# Supplementary material for: Possible cross-feeding pathway of facultative methylotroph Methyloceanibacter caenitepidi Gela4 on methanotroph Methylocaldum marinum S8
Source: PubMed Central journal article supplement (PMC6417678; doi:10.1371/journal.pone.0213535), 2019-03-14
Supplement: pone.0213535.s001.pdf [file pone.0213535.s001.pdf]

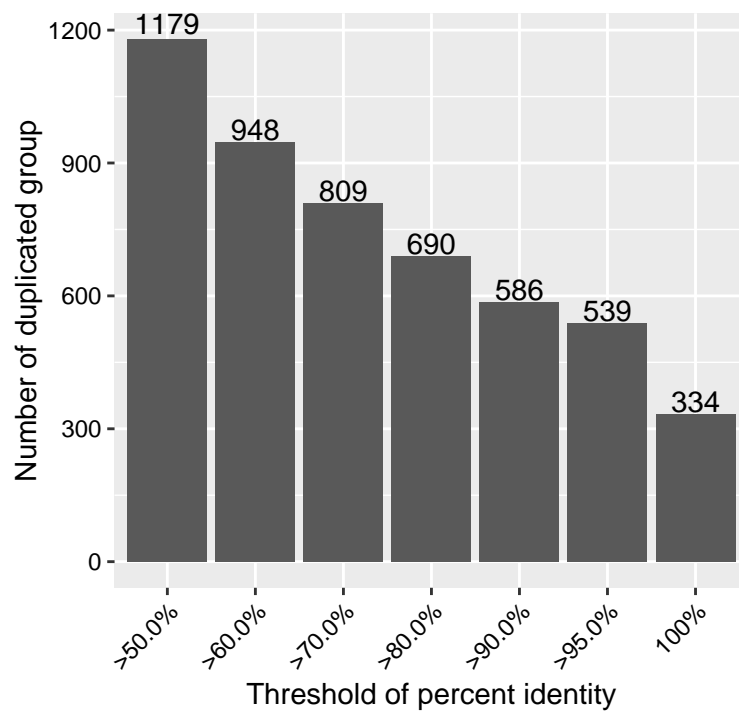

S1 Fig. Number of duplicated genes in the *M. marinum* S8 genome.
