# Supplementary material for: Possible cross-feeding pathway of facultative methylotroph Methyloceanibacter caenitepidi Gela4 on methanotroph Methylocaldum marinum S8
Source: PubMed Central journal article supplement (PMC6417678; doi:10.1371/journal.pone.0213535), 2019-03-14
Supplement: pone.0213535.s004.pdf [file pone.0213535.s004.pdf]

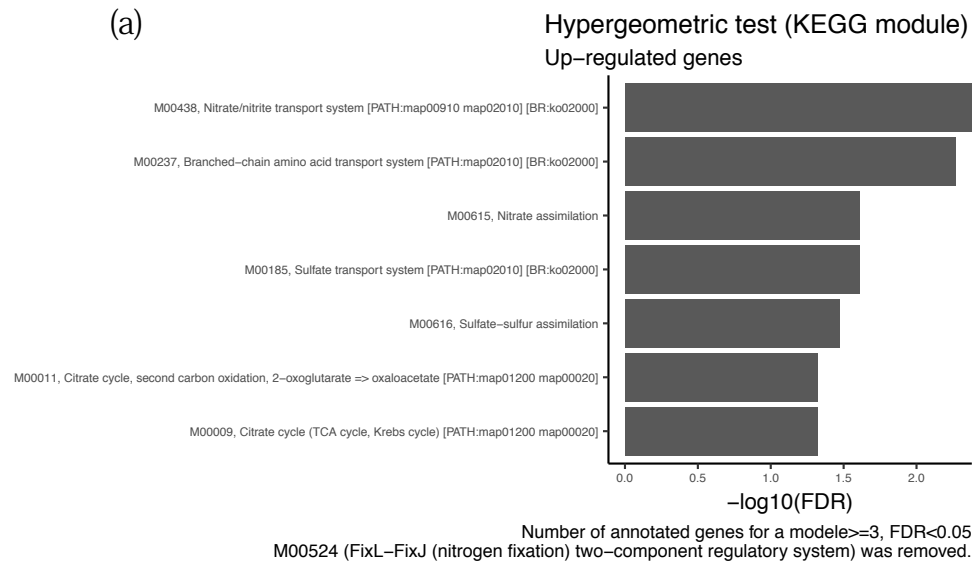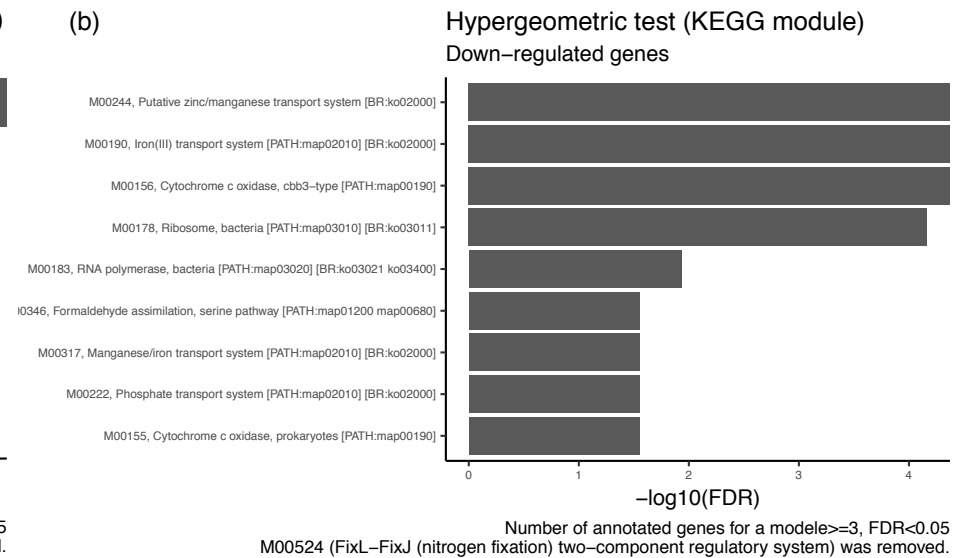

**S4 Fig. The results of hypergeometric test for overlaps of KEGG modules with (a) up- or (b) downregulated genes.**  
The modules with  $\text{FDR} < 0.05$  and  $\geq 3$  annotated *M. caenitepidi* Gela4 genes are shown according to the value of  $\log_{10}(\text{FDR})$ .
