# Supplementary material for: Possible cross-feeding pathway of facultative methylotroph Methyloceanibacter caenitepidi Gela4 on methanotroph Methylocaldum marinum S8
Source: PubMed Central journal article supplement (PMC6417678; doi:10.1371/journal.pone.0213535), 2019-03-14
Supplement: pone.0213535.s005.pdf [file pone.0213535.s005.pdf]

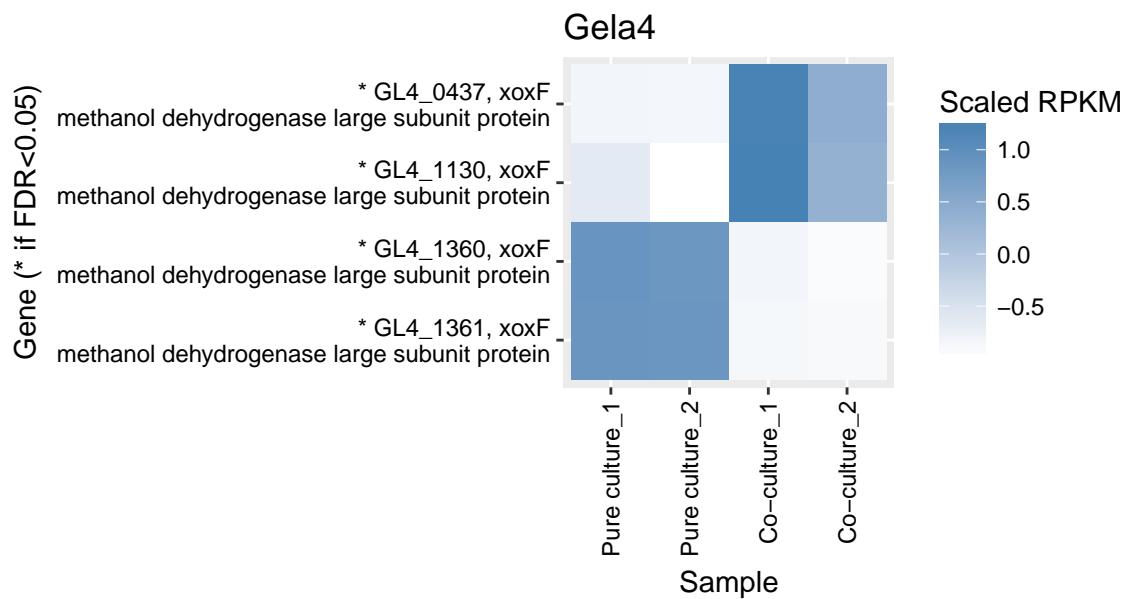

**S5 Fig. Heat maps showing the expression levels of four xoxF genes of *M. caenitepidi* Gela4 in pure culture and co-culture with *M. marinum* S8. Scaled RPKM was calculated as a z-score of RPKM values for each gene per culture.**
