# Supplementary material for: Possible cross-feeding pathway of facultative methylotroph Methyloceanibacter caenitepidi Gela4 on methanotroph Methylocaldum marinum S8
Source: PLoS One. 2019 Mar 14;14(3):e0213535. doi: 10.1371/journal.pone.0213535 (PMC6417678; doi:10.1371/journal.pone.0213535)
Supplement: S5 Table — (XLSX) [file pone.0213535.s010.xlsx]

## Sheet: sheet1
S5 Table. Transcriptomics data of M. caenitepidi Gela4 grown in pure culture with methanol as well as in co-culture with M. marinum and methane.
column title			description
count_pure_culture_1			Raw read count for the first replicate of pure culture
count_pure_culture_2			Raw read count for the second replicate of pure culture
count_co_culture_1			Raw read count for the first replicate of co-culture
count_co_culture_2			Raw read count for the second replicate of co-culture
RPM_pure_culture_1			Reads per million mapped reads for the first replicate of pure culture
RPM_pure_culture_2			Reads per million mapped reads for the second replicate of pure culture
RPM_co_culture_1			Reads per million mapped reads for the first replicate of co-culture
RPM_co_culture_2			Reads per million mapped reads for the second replicate of co-culture
mean_RPM_pure_culture			Arithmetic mean of RPM for replicates of pure culture
mean_RPM_co_culture			Arithmetic mean of RPM for replicates of co-culture
RPKM_pure_culture_1			RPKM for the first replicate of pure culture
RPKM_pure_culture_2			RPKM for the second replicate of pure culture
RPKM_co_culture_1			RPKM for the first replicate of co-culture
RPKM_co_culture_2			RPKM for the second replicate of co-culture
mean_RPKM_pure_culture			Arithmetic mean of RPKM for replicates of pure culture
mean_RPKM_co_culture			Arithmetic mean of RPKM for replicates of co-culture
log2FC_RPKM			Log2 fold change of RPKM (co-culture/pure culture)
meanFittedValue_pure_culture			Mean fitted value for pure culture (calculated by EdgeR)
meanFittedValue_co_culture			Mean fitted value for co-culture (calculated by EdgeR)
fittedValue_pure_culture_1			Fitted value for the first replicate of pure culture (calculated by EdgeR)
fittedValue_pure_culture_2			Fitted value for the second replicate of pure culture (calculated by EdgeR)
fittedValue_co_culture_1			Fitted value for the first replicate of co-culture (calculated by EdgeR)
fittedValue_co_culture_2			Fitted value for the second replicate of co-culture (calculated by EdgeR)
logFC			Log fold changes (calculated by EdgeR)
logCPM			Logarithm of counts per million reads (calculated by EdgeR)
F			Test statistic for the quasi-likelihood test (calculated by EdgeR)
PValue			p-value (calculated by EdgeR)
FDR			False discovery rate (calculated by EdgeR)
gene_id	feature	start	end	EC_number	gene_name	swiss_prot_accession	swiss_prot_gene_name	length	count_pure_culture_1	count_pure_culture_2	count_co_culture_1	count_co_culture_2	RPM_pure_culture_1	RPM_pure_culture_2	RPM_co_culture_1	RPM_co_culture_2	mean_RPM_pure_culture	mean_RPM_co_culture	RPKM_pure_culture_1	RPKM_pure_culture_2	RPKM_co_culture_1	RPKM_co_culture_2	mean_RPKM_pure_culture	mean_RPKM_co_culture	log2FC_RPKM	meanFittedValue_pure_culture	meanFittedValue_co_culture	fittedValue_pure_culture_1	fittedValue_pure_culture_2	fittedValue_co_culture_1	fittedValue_co_culture_2	logFC	logCPM	F	PValue	FDR
GL4_0001	CDS	445	1842	4.3.2.1	argininosuccinate lyase	Q20WT9	argH,RPC_4875	1398	3867	4304	742	920	151.422	149.435	182.84	168.096	150.429	175.468	108.313	106.892	130.787	120.241	107.603	125.514	0.220235	4085.75	832.548	3861.69	4309.82	719.975	945.121	0.21104	7.87748	13.9105	0.0025491	0.00570292
GL4_0002	CDS	1949	2137	.	hypothetical protein	NA	NA	189	1661	1948	272	356	65.0407	67.6347	67.0251	65.046	66.3377	66.0355	344.131	357.855	354.63	344.159	350.993	349.394	-0.0065674	1803.15	314.011	1704.26	1902.03	271.552	356.47	-0.0155812	6.61153	0.0507264	0.825328	0.857259
GL4_0003	CDS	2179	3462	4.1.1.20	diaminopimelate decarboxylase	Q9Z661	lysA,ZMO1768	1284	3078	3244	390	507	120.527	112.632	96.1021	92.6358	116.579	94.3689	93.8683	87.7195	74.8459	72.1462	90.7939	73.4961	-0.301235	3164.6	448.579	2991.05	3338.15	387.924	509.234	-0.312517	7.32758	25.1684	0.000240402	0.000732203
GL4_0004	CDS	3577	6285	.	hypothetical protein	NA	NA	2709	12478	13929	1921	2415	488.608	483.616	473.364	441.253	486.112	457.309	180.365	178.522	174.738	162.884	179.443	168.811	-0.0876161	13203.4	2173.05	12479.3	13927.5	1879.22	2466.87	-0.0970729	9.44401	2.82219	0.116976	0.162935
GL4_0005	CDS	6383	7489	.	hypothetical protein	NA	NA	1107	2389	2591	352	444	93.5474	89.9597	86.7383	81.1248	91.7535	83.9316	84.5053	81.2644	78.3544	73.2835	82.8849	75.8189	-0.126949	2491.27	398.242	2354.65	2627.89	344.394	452.091	-0.139102	7.03863	5.01418	0.0433794	0.0684583
GL4_0006	CDS	7486	8031	2.4.2.8	hypoxanthine-guanine phosphoribosyltransferase	P37171	hpt,RCAP_rcc01790	546	860	971	165	169	33.6755	33.7132	40.6586	30.8786	33.6943	35.7686	61.6767	61.7458	74.4663	56.5542	61.7112	65.5102	0.0848521	915.367	167.373	865.168	965.566	144.742	190.005	0.0547556	5.65484	0.267494	0.613759	0.67611
GL4_0007	CDS	8082	8753	.	hypothetical protein	NA	NA	672	5158	5464	734	894	201.975	189.71	180.869	163.346	195.843	172.107	300.558	282.307	269.15	243.074	291.432	256.112	-0.185704	5317.62	816.091	5026	5609.25	705.743	926.439	-0.197924	8.10179	10.3449	0.00680029	0.0133874
GL4_0008	CDS	9335	10012	.	cell division transporter, ATP-binding protein FtsE	P0A9S0	ftsE,SF3481,S4282	678	1653	1926	317	425	64.7274	66.8708	78.1138	77.6533	65.7991	77.8835	95.4682	98.6296	115.212	114.533	97.0489	114.872	0.240964	1788.34	370.895	1690.27	1886.42	320.744	421.046	0.236481	6.6799	12.931	0.00328754	0.00709363
GL4_0009	CDS	10024	11022	.	cell division protein FtsX	P44872	ftsX,HI_0770	999	1400	1637	238	307	54.8206	56.8367	58.6469	56.0931	55.8287	57.37	54.8755	56.8936	58.7056	56.1492	55.8845	57.4274	0.0386088	1517.5	272.551	1434.28	1600.72	235.698	309.405	0.0289488	6.3762	0.155657	0.699623	0.750578
GL4_0010	CDS	11112	11828	.	hypothetical protein	Q92FX1	RC1356	717	757	795	140	211	29.6423	27.6025	34.4982	38.5526	28.6224	36.5254	41.3421	38.4971	48.1146	53.7693	39.9196	50.9419	0.344108	776.583	175.251	733.994	819.171	151.554	198.947	0.358242	5.49856	12.8553	0.00335425	0.00721336
GL4_0011	CDS	11835	12560	2.3.1.51	1-acyl-sn-glycerol-3-phosphate acyltransferase	Q95JH0	AGPAT1	726	507	528	107	144	19.8529	18.3322	26.3665	26.3108	19.0925	26.3386	27.3456	25.251	36.3175	36.2407	26.2983	36.2791	0.449557	517.995	125.459	489.588	546.402	108.495	142.423	0.460161	4.93536	15.7762	0.00161307	0.00383291
GL4_0012	CDS	12709	13140	.	hypothetical protein	NA	NA	432	4249	4646	347	484	166.38	161.309	85.5062	88.4334	163.845	86.9698	385.14	373.401	197.931	204.707	379.271	201.319	-0.910395	4449.54	415.009	4205.52	4693.55	358.894	471.125	-0.916332	7.64968	220.386	1.70344e-09	2.30519e-08
GL4_0013	CDS	13204	13815	.	Polybetahydroxybutyrate accumulation regulatory protein	P45373	Alvin_0064	612	5965	7185	1237	1569	233.575	249.464	304.816	286.678	241.519	295.747	381.658	407.62	498.066	468.427	394.639	483.246	0.291556	6562.55	1405.2	6202.65	6922.44	1215.2	1595.21	0.282561	8.60084	21.7755	0.000448568	0.0012698
GL4_0014	CDS	14040	15221	2.3.1.9	acetyl-CoA acetyltransferase	P50174	phaA,R03262,SMc03879	1182	22836	25268	4205	4830	894.202	877.307	1036.18	882.506	885.754	959.342	756.516	742.222	876.631	746.621	749.369	811.626	0.114991	24057.6	4554.41	22738.2	25376.9	3938.59	5170.24	0.104894	10.4016	2.36422	0.148272	0.200161
GL4_0015	CDS	15377	16099	1.1.1.36	acetoacetyl-CoA reductase	P23238	phaB,phbB	723	6035	6982	1315	1537	236.316	242.415	324.037	280.831	239.366	302.434	326.855	335.291	448.183	388.424	331.073	418.304	0.336496	6502.68	1433.65	6146.07	6859.3	1239.8	1627.51	0.324699	8.60702	25.6781	0.000220008	0.000675652
GL4_0016	CDS	16143	16580	.	hypothetical protein of Cupin superfamily	NA	NA	438	887	964	193	203	34.7328	33.4701	47.5582	37.0908	34.1014	42.3245	79.2985	76.4158	108.58	84.6823	77.8572	96.6314	0.308102	925.8	198.433	875.028	976.571	171.602	225.264	0.283942	5.7339	8.08649	0.0138965	0.0253209
GL4_0017	CDS	16586	17356	3.1.2.6	hydroxyacylglutathione hydrolase	B0CIU0	gloB,BSUIS_A1776	771	1571	1723	314	366	61.5165	59.8227	77.3745	66.8732	60.6696	72.1238	79.788	77.591	100.356	86.7356	78.6895	93.5458	0.246624	1647.42	340.516	1557.07	1737.76	294.473	386.559	0.231606	6.55912	10.4161	0.00665753	0.0131297
GL4_0018	CDS	18232	18876	2.3.1.31	homoserine O-acetyltransferase	NA	NA	645	1339	1525	210	277	52.432	52.9481	51.7473	50.6117	52.69	51.1795	81.2899	82.0901	80.2283	78.4677	81.69	79.348	-0.04145	1431.6	243.488	1353.09	1510.11	210.565	276.412	-0.0496458	6.27043	0.448583	0.514803	0.586107
GL4_0019	CDS	18873	20075	2.3.1.31	homoserine O-acetyltransferase	Q98G09	metX,mlr3538	1203	3915	4426	827	1010	153.302	153.671	203.786	184.541	153.486	194.163	127.433	127.74	169.398	153.4	127.586	161.399	0.336806	4169.28	920.829	3940.63	4397.92	796.319	1045.34	0.327241	7.95664	32.1172	7.89137e-05	0.000272232
GL4_0020	CDS	20277	21455	2.6.1.57	biosynthetic aromatic amino acid aminotransferase beta	Q11DR9	hisC,Meso_3084	1179	2064	2391	338	449	80.8212	83.0157	83.2885	82.0384	81.9184	82.6634	68.5506	70.4119	70.6433	69.583	69.4813	70.1132	0.0128767	2226.1	393.431	2104.02	2348.18	340.233	446.629	0.0057107	6.92148	0.00824644	0.929037	0.942142
GL4_0021	CDS	21452	22378	1.3.1.43	cyclohexadienyl dehydrogenase	Q04983	tyrC,ZMO0420	927	1187	1268	192	213	46.48	44.025	47.3118	38.918	45.2525	43.1149	50.1403	47.492	51.0375	41.9827	48.8161	46.5101	-0.0683769	1228.21	202.808	1160.86	1295.57	175.386	230.231	-0.0923107	6.0403	1.04648	0.325095	0.397379
GL4_0022	CDS	22362	22934	.	cation transport protein chaC	P39163	chaC,b1218,JW1209	573	418	500	65	87	16.3679	17.36	16.017	15.8961	16.8639	15.9565	28.5652	30.2967	27.9529	27.7418	29.431	27.8474	-0.0771001	458.526	75.9837	433.38	483.672	65.7096	86.2579	-0.0871525	4.6319	0.404857	0.535703	0.605143
GL4_0023	CDS	22931	24652	.	hypothetical protein	Q8EJM6	pdeB,SO_0437	1722	4095	4685	587	654	160.35	162.663	144.646	119.495	161.507	132.07	93.1186	94.462	83.9988	69.3929	93.7903	76.6959	-0.286901	4387.54	623.254	4146.92	4628.15	538.981	707.528	-0.309456	7.79163	19.7833	0.00066716	0.00180714
GL4_0024	CDS	24953	25108	.	LSU ribosomal protein L32p	B0UPF9	rpmF,M446_5277	156	2307	2451	478	625	90.3365	85.0989	117.787	114.196	87.7177	115.991	579.08	545.506	755.043	732.025	562.293	743.534	0.402453	2381.08	551.543	2250.5	2511.66	476.966	626.12	0.395949	7.16058	44.5842	1.57205e-05	6.51969e-05
GL4_0025	CDS	25241	26077	.	monofunctional biosynthetic peptidoglycan transglycosylase	B3PR74	mtgA,RHECIAT_CH0004300	837	1605	1867	292	370	62.8479	64.8224	71.9534	67.604	63.8351	69.7787	75.0871	77.4461	85.9658	80.7694	76.2666	83.3676	0.126845	1734.93	331.145	1639.79	1830.08	286.369	375.921	0.116689	6.59648	2.9273	0.110982	0.155956
GL4_0026	CDS	26155	27060	2.5.1.90	Octaprenyl diphosphate synthase	P45204	ispA,HI_1438	906	966	1042	201	257	37.8262	36.1783	49.5295	46.9574	37.0023	48.2435	41.7508	39.9319	54.6684	51.8293	40.8413	53.2489	0.374664	1004.42	229.063	949.338	1059.5	198.09	260.036	0.37343	5.88021	21.0959	0.000512199	0.00143891
GL4_0027	CDS	27170	27784	.	probable transmembrane protein	NA	NA	615	679	785	115	131	26.588	27.2552	28.3378	23.9355	26.9216	26.1366	43.2325	44.3175	46.0777	38.9195	43.775	42.4986	-0.0417241	731.661	123.157	691.536	771.786	106.505	139.81	-0.064604	5.30452	0.351648	0.56342	0.631813
GL4_0028	CDS	27788	29056	1.17.7.1	1-hydroxy-2-methyl-2-(E)-butenyl 4-diphosphate synthase	A5ETI5	ispG,BBta_7633	1269	4621	5299	637	818	180.947	183.982	156.967	149.46	182.464	153.213	142.59	144.982	123.693	117.778	143.786	120.735	-0.250173	4956.85	728	4685.01	5228.68	629.564	826.437	-0.261352	7.97998	20.9239	0.000529921	0.00147964
GL4_0029	CDS	29143	29472	.	hypothetical protein	NA	NA	330	455	431	47	64	17.8167	14.9643	11.5815	11.6937	16.3905	11.6376	53.99	45.3465	35.0956	35.4354	49.6682	35.2655	-0.482486	444.088	55.4824	419.734	468.442	47.9803	62.9845	-0.494414	4.51576	9.16586	0.00977119	0.018577
GL4_0030	CDS	29544	30794	.	putative metal chaperone	P94400	yciC,BSU03360	1251	2104	2252	161	220	82.3875	78.1896	39.6729	40.197	80.2885	39.9349	65.8573	62.5017	31.713	32.1319	64.1795	31.9224	-0.985348	2179.49	190.442	2059.97	2299.02	164.691	216.192	-1.01038	6.65243	175.57	6.79686e-09	7.55312e-08
GL4_0031	CDS	30933	31958	.	zinc ABC transporter, periplasmic-binding protein ZnuA	Q57449	HI_0362	1026	4285	4945	334	389	167.79	171.691	82.3028	71.0756	169.74	76.6892	163.538	167.34	80.2172	69.2744	165.439	74.7458	-1.13576	4611.53	362.271	4358.63	4864.43	313.287	411.256	-1.16397	7.64866	292.914	2.94723e-10	5.05738e-09
GL4_0032	CDS	31994	32860	.	zinc ABC transporter, inner membrane permease protein ZnuB	P31309		867	1252	1226	107	146	49.0253	42.5668	26.3665	26.6762	45.796	26.5213	56.5459	49.0967	30.4112	30.7684	52.8213	30.5898	-0.768719	1241.22	126.47	1173.15	1309.29	109.369	143.571	-0.788664	5.91261	50.6686	8.11572e-06	3.64605e-05
GL4_0033	CDS	32857	33636	.	zinc ABC transporter, ATP-binding protein ZnuC	Q9KD30	mntB,BH1389	780	1737	1855	128	167	68.0167	64.4057	31.5412	30.5132	66.2112	31.0272	87.2009	82.5714	40.4374	39.1194	84.8861	39.7784	-1.07462	1797.21	147.506	1698.65	1895.78	127.561	167.451	-1.10068	6.37423	172.078	7.67423e-09	8.34886e-08
GL4_0034	CDS	33648	33770	.	hypothetical protein	NA	NA	123	380	426	21	22	14.8799	14.7907	5.17473	4.0197	14.8353	4.59721	120.975	120.25	42.071	32.6805	120.612	37.3757	-1.66402	402.973	21.5193	380.874	425.073	18.6096	24.4291	-1.71918	4.25623	78.3627	7.61133e-07	4.66632e-06
GL4_0035	CDS	33833	34267	.	zinc uptake regulation protein ZUR	P0AC52	zur,SF4159,S3572	435	2863	3130	174	276	112.108	108.674	42.8763	50.4289	110.391	46.6526	257.72	249.825	98.5663	115.929	253.772	107.247	-1.23488	2997.67	224.6	2833.28	3162.06	194.23	254.969	-1.23223	7.05011	246.594	8.54259e-10	1.25833e-08
GL4_0036	CDS	34335	34769	.	transcriptional regulator, AraC family	P07642	araC	435	475	512	70	79	18.5998	17.7767	17.2491	14.4344	18.1883	15.8417	42.7582	40.8659	39.6531	33.1825	41.8121	36.4178	-0.194294	493.762	74.6209	466.684	520.841	64.531	84.7108	-0.220014	4.71181	2.53509	0.135504	0.185407
GL4_0037	CDS	35189	36172	.	hypothetical protein	NA	NA	984	929	1040	174	236	36.3774	36.1089	42.8763	43.1204	36.2431	42.9984	36.9689	36.696	43.5735	43.8215	36.8324	43.6975	0.240571	984.463	204.935	930.474	1038.45	177.225	232.645	0.241828	5.81073	8.46064	0.0122702	0.0226805
GL4_0038	CDS	36223	36744	.	macro domain, possibly ADP-ribose binding module	Q8KAE4	CT2219	522	254	301	41	64	9.94602	10.4507	10.103	11.6937	10.1984	10.8984	19.0537	20.0206	19.3545	22.4017	19.5371	20.8781	0.0912515	277.285	52.4134	262.078	292.491	45.3263	59.5004	0.102609	3.95027	0.386596	0.544911	0.613463
GL4_0039	CDS	36741	38186	4.1.99.3	deoxyribodipyrimidine photolyase	A9CJC9	phrA,Atu1218	1446	600	648	117	151	23.4945	22.4986	28.8306	27.5897	22.9966	28.2102	16.2479	15.5592	19.9382	19.08	15.9036	19.5091	0.278937	624.269	134.025	590.034	658.505	115.903	152.147	0.286293	5.1603	7.35843	0.0178434	0.0313791
GL4_0040	CDS	38190	39233	3.2.1.52	beta-hexosaminidase	P40406	nagZ,ybbD,yzbA,BSU01660	1044	1177	1247	218	271	46.0884	43.2959	53.7186	49.5154	44.6922	51.617	44.146	41.4712	51.4546	47.4285	42.8086	49.4416	0.203399	1212.82	244.638	1146.31	1279.34	211.56	277.717	0.196366	6.10142	6.07089	0.0285617	0.0475409
GL4_0041	CDS	39273	39419	.	hypothetical protein	NA	NA	147	267	319	71	84	10.4551	11.0757	17.4955	15.3479	10.7654	16.4217	71.1229	75.3449	119.017	104.408	73.2339	111.712	0.602496	292.743	77.6031	276.689	308.797	67.11	88.0962	0.590248	4.13924	16.2226	0.00145271	0.00350948
GL4_0042	CDS	39529	40110	.	hypothetical protein	NA	NA	582	1573	1664	328	352	61.5948	57.7742	80.8243	64.3152	59.6845	72.5697	105.833	99.2684	138.873	110.507	102.551	124.69	0.279536	1619.76	340.879	1530.93	1708.58	294.787	386.971	0.257574	6.54355	9.40187	0.00907132	0.0173754
GL4_0043	CDS	40256	40669	.	integral membrane protein	NA	NA	414	470	508	82	109	18.4041	17.6378	20.2061	19.9158	18.0209	20.0609	44.4542	42.6034	48.807	48.1057	43.5288	48.4564	0.151417	489.232	95.4852	462.402	516.062	82.5741	108.396	0.148815	4.77398	1.4163	0.255426	0.322454
GL4_0044	CDS	40690	41346	2.3.1.51	1-acyl-sn-glycerol-3-phosphate acyltransferase	Q8GXU8	LPAT1,ATS2,EMB1995,LPAAT1,At4g30580,F17I23.80	657	449	521	63	96	17.5817	18.0892	15.5242	17.5405	17.8354	16.5323	26.7606	27.533	23.6289	26.6979	27.1468	25.1634	-0.105422	484.714	79.3685	458.132	511.296	68.6367	90.1003	-0.104402	4.70785	0.58564	0.457864	0.531276
GL4_0045	CDS	41367	42323	2.7.7.41	phosphatidate cytidylyltransferase	P76091	ynbB,b1409,JW1406	957	832	867	148	224	32.5791	30.1023	36.4695	40.9278	31.3407	38.6987	34.0429	31.4549	38.1082	42.7668	32.7489	40.4375	0.296096	850.215	185.738	803.588	896.841	160.623	210.853	0.311419	5.6173	10.1105	0.00729603	0.0142789
GL4_0046	CDS	42320	42928	2.7.8.5	CDP-diacylglycerol--glycerol-3-phosphate 3-phosphatidyltransferase	P76090	ynbA,b1408,JW1405	609	377	409	82	80	14.7624	14.2005	20.2061	14.6171	14.4815	17.4116	24.2404	23.3177	33.1791	24.0018	23.7791	28.5904	0.25601	393.158	81.295	371.597	414.719	70.3027	92.2873	0.232062	4.47725	2.32655	0.151287	0.203818
GL4_0047	CDS	42954	44480	.	probable low-affinity inorganic phosphate transporter	Q9ZJC8	jhp_1384	1527	1753	2013	318	468	68.6432	69.8915	78.3602	85.5099	69.2673	81.9351	44.953	45.7705	51.3164	55.9987	45.3617	53.6575	0.237486	1882.18	392.375	1778.96	1985.39	339.32	445.43	0.243925	6.75693	12.6947	0.00350116	0.0074954
GL4_0048	CDS	44647	45069	3.6.1.17	bis(5'-nucleosyl)-tetraphosphatase	NA	NA	423	1618	1761	405	488	63.3569	61.142	99.7983	89.1642	62.2495	94.4813	149.78	144.544	235.93	210.79	147.162	223.36	0.598641	1690.12	447.095	1597.43	1782.81	386.641	507.55	0.587516	6.72953	81.5633	6.07797e-07	3.79195e-06
GL4_0049	CDS	45066	45740	3.1.1.2	arylesterase precursor	P0ADA1	tesA,apeA,pldC,b0494,JW0483	675	2192	2526	562	717	85.8334	87.7029	138.486	131.006	86.7681	134.746	127.161	129.93	205.164	194.082	128.545	199.623	0.63103	2357.66	639.907	2228.36	2486.96	553.382	726.432	0.62458	7.24408	122.003	5.9665e-08	5.13242e-07
GL4_0050	CDS	45842	46558	.	ABC transporter, ATP-binding protein	P0A9U0	ybbA,SF0439,S0447	717	2416	2840	493	612	94.6047	98.605	121.483	111.821	96.6048	116.652	131.945	137.524	169.432	155.956	134.735	162.694	0.270214	2625.49	553.126	2481.5	2769.47	478.335	627.917	0.259123	7.25022	18.1867	0.000934632	0.00242888
GL4_0051	CDS	46555	49131	.	ABC transporter, permease protein	P77504	ybbP,b0496,JW0485	2577	6432	6739	1273	1519	251.861	233.979	313.687	277.542	242.92	295.614	97.7343	90.7949	121.726	107.7	94.2646	114.713	0.280534	6595.87	1402.11	6234.15	6957.59	1212.52	1591.69	0.272071	8.60326	18.2503	0.000921838	0.00239911
GL4_0052	CDS	49302	50060	.	membrane protein	Q9ZE15	RP147	759	21490	23191	2366	2968	841.496	805.193	583.019	542.294	823.344	562.657	1108.69	1060.86	768.142	714.485	1084.78	741.313	-0.548626	22360.6	2673.86	21134.4	23586.9	2312.31	3035.41	-0.557912	10.0159	87.0401	4.20816e-07	2.79633e-06
GL4_0053	CDS	50341	50724	.	hypothetical protein	NA	NA	384	2553	2909	472	611	99.9692	101.001	116.308	111.638	100.485	113.973	260.337	263.023	302.886	290.724	261.68	296.805	0.181064	2729.94	541.653	2580.22	2879.65	468.413	614.893	0.172608	7.27453	9.17664	0.00973788	0.0185242
GL4_0054	CDS	51047	51862	.	hypothetical protein that often co-occurs with aconitase	NA	NA	816	2523	2799	447	556	98.7945	97.1815	110.148	101.589	97.988	105.868	121.072	119.095	134.985	124.496	120.083	129.741	0.110706	2661.29	502.007	2515.35	2807.24	434.128	569.886	0.0996916	7.21146	2.88901	0.113121	0.158488
GL4_0055	CDS	52004	54706	4.2.1.3	aconitate hydratase	P70920	acnA,bll0466	2703	20463	22652	1677	2259	801.281	786.479	413.239	412.75	793.88	412.994	296.441	290.965	152.882	152.701	293.703	152.791	-0.938291	21562.2	1965.3	20379.7	22744.7	1699.56	2231.04	-0.949622	9.83608	260.191	6.13552e-10	9.45609e-09
GL4_0056	CDS	54871	55674	.	ABC transporter, ATPase component CcmA	Q11CZ6	ccmA,Meso_3358	804	1343	1430	168	215	52.5886	49.6497	41.3978	39.2834	51.1191	40.3406	65.4087	61.7533	51.4898	48.86	63.581	50.1749	-0.335674	1387.41	191.54	1311.32	1463.49	165.641	217.439	-0.350562	6.15212	18.2652	0.000918864	0.0023935
GL4_0057	CDS	55671	56339	.	ABC transporter, CcmB subunit	P30964	cycW,ccmB,blr0468	669	600	636	128	152	23.4945	22.082	31.5412	27.7725	22.7882	29.6568	35.1189	33.0074	47.1468	41.5134	34.0631	44.3301	0.370513	618.415	140.16	584.501	652.329	121.208	159.112	0.364438	5.16754	11.3586	0.00506179	0.0103315
GL4_0058	CDS	56433	57176	.	cytochrome c-type biogenesis protein CcmC, putative heme lyase for CcmE	P30962	cycZ,ccmC,blr0469	744	2086	2388	293	340	81.6827	82.9115	72.1998	62.1226	82.2971	67.1612	109.789	111.44	97.0427	83.4981	110.614	90.2704	-0.290303	2236.05	316.975	2113.42	2358.68	274.115	359.835	-0.31243	6.83633	19.5014	0.000707163	0.00190311
GL4_0059	CDS	57191	57400	.	hypothetical protein	P30959	cycX,ccmD,bsr0470	210	834	852	67	100	32.6574	29.5815	16.5098	18.2714	31.1194	17.3906	155.511	140.864	78.6183	87.0064	148.188	82.8124	-0.831895	844.024	83.4364	797.737	890.311	72.1545	94.7182	-0.832205	5.36907	46.4448	1.27493e-05	5.42743e-05
GL4_0060	CDS	57403	58101	.	cytochrome c-type biogenesis protein CcmG/DsbE, thiol:disulfide oxidoreductase	P30960	cycY,ccmG,blr0471	699	12189	13684	869	1092	477.291	475.109	214.135	199.523	476.2	206.829	682.82	679.699	306.345	285.441	681.259	295.893	-1.20038	12934.5	982.292	12225.2	13643.8	849.471	1115.11	-1.21285	9.05256	411.865	3.51162e-11	8.35014e-10
GL4_0061	CDS	58098	58541	.	transcriptional regulator, MarR family	Q93CC3	hosA	444	33535	37395	2342	3210	1313.15	1298.36	577.105	586.51	1305.75	581.808	2957.54	2924.23	1299.79	1320.97	2940.88	1310.38	-1.16566	35465.8	2769.19	33520.8	37410.8	2394.75	3143.62	-1.17284	10.4743	383.162	5.52311e-11	1.20173e-09
GL4_0062	CDS	58794	59420	.	probable intracellular septation protein	B6JAN9	OCAR_4259,OCA5_c02590	627	16146	17921	1561	2154	632.238	622.218	384.655	393.565	627.228	389.11	1008.35	992.374	613.485	627.695	1000.36	620.59	-0.687931	17036	1852.69	16101.7	17970.2	1602.18	2103.2	-0.694837	9.58291	137.532	2.93838e-08	2.76324e-07
GL4_0063	CDS	59404	60369	.	signal recognition particle receptor protein FtsY	A9CHH2	ftsY,Atu2693	966	3404	3787	446	671	133.292	131.485	109.901	122.601	132.389	116.251	137.984	136.113	113.77	126.916	137.048	120.343	-0.186085	3595.74	556.76	3398.55	3792.93	481.478	632.043	-0.185102	7.54737	8.05073	0.0140647	0.0255715
GL4_0064	CDS	60366	61640	.	MiaB family protein	Q9ZDB6	mtaB,RP416	1275	4909	5385	728	894	192.224	186.968	179.391	163.346	189.596	171.368	150.764	146.641	140.698	128.114	148.703	134.406	-0.144804	5149.11	812.837	4866.73	5431.49	702.929	922.745	-0.15723	8.07014	7.20014	0.0188674	0.0328502
GL4_0065	CDS	61691	62578	5.1.1.7	diaminopimelate epimerase	B6JAP3	dapF,OCAR_4263,OCA5_c02550	888	1427	1490	192	258	55.8778	51.7329	47.3118	47.1401	53.8054	47.2259	62.9255	58.2578	53.2791	53.0857	60.5916	53.1824	-0.184911	1459.87	224.951	1379.81	1539.93	194.534	255.368	-0.192074	6.26168	5.70263	0.0329218	0.0540151
GL4_0066	CDS	62633	63832	.	permeases of the major facilitator superfamily	Q58713	MJ1317	1200	878	975	161	224	34.3803	33.8521	39.6729	40.9278	34.1162	40.3004	28.6503	28.2101	33.0608	34.1065	28.4302	33.5836	0.232794	926.557	192.393	875.744	977.37	166.379	218.408	0.238174	5.72143	7.60254	0.0163891	0.0291294
GL4_0067	CDS	63944	65140	.	amidase	Q9FR37	AMI1,TOC64-I,At1g08980,F7G19.15	1197	941	1044	182	250	36.8473	36.2477	44.8476	45.6784	36.5475	45.263	30.783	30.2822	37.4667	38.1607	30.5326	37.8137	0.299723	992.573	215.902	938.139	1047.01	186.708	245.095	0.305189	5.8415	13.8016	0.0026209	0.00584784
GL4_0068	CDS	65189	65530	.	ethidium bromide-methyl viologen resistance protein EmrE	P23895	emrE,eb,mvrC,b0543,JW0531	342	368	357	54	79	14.41	12.3951	13.3064	14.4344	13.4025	13.8704	42.1344	36.2429	38.9077	42.2058	39.1887	40.5567	0.0482943	363.211	66.4239	343.292	383.13	57.4424	75.4054	0.0549806	4.32573	0.123532	0.730901	0.777619
GL4_0069	CDS	65766	66176	.	hypothetical protein	NA	NA	411	1240	1423	243	328	48.5554	49.4066	59.879	59.93	48.981	59.9045	118.14	120.211	145.691	145.815	119.175	145.753	0.288252	1331	285.41	1258.01	1404	246.818	324.002	0.284599	6.26407	15.4064	0.00176159	0.00412399
GL4_0070	CDS	66176	67696	.	signal recognition particle, subunit Ffh SRP54	Q4UKH4	ffh,RF_1106	1521	4845	5426	826	1083	189.718	188.391	203.539	197.879	189.055	200.709	124.733	123.86	133.819	130.098	124.296	131.959	0.0856331	5135.08	954.543	4853.47	5416.69	825.474	1083.61	0.0785398	8.15551	2.01826	0.179102	0.236412
GL4_0071	CDS	67743	68234	.	SSU ribosomal protein S16p	A8IKU6	rpsP,AZC_3952	492	7990	9411	957	1135	312.869	326.751	235.82	207.38	319.81	221.6	635.912	664.127	479.308	421.504	650.02	450.406	-0.528275	8688.56	1050.42	8212.08	9165.05	908.39	1192.46	-0.542084	8.68244	70.0633	1.41882e-06	8.06016e-06
GL4_0072	CDS	68262	68795	.	16S rRNA processing protein RimM	Q3SNV7	rimM,Nwi_2781	534	2293	2513	396	470	89.7883	87.2515	97.5806	85.8754	88.5199	91.728	168.143	163.392	182.735	160.815	165.768	171.775	0.0510575	2403.77	433.714	2271.94	2535.59	375.07	492.359	0.0355634	7.04258	0.304916	0.590243	0.655847
GL4_0073	CDS	68837	70135	4.6.1.1	adenylate cyclase	P9WQ35	cya,Rv1625c,MTCY01B2.17c	1299	3346	3744	289	407	131.021	129.992	71.2141	74.3644	130.507	72.7893	100.863	100.071	54.8223	57.2474	100.467	56.0348	-0.831094	3544.81	347.632	3350.41	3739.21	300.627	394.637	-0.843961	7.35221	178.92	6.06252e-09	6.88938e-08
GL4_0074	CDS	70149	70853	2.1.1.31	tRNA (Guanine37-N1) -methyltransferase	Q2J399	trmD,RPB_0350	705	1105	1217	135	178	43.2691	42.2543	33.2661	32.523	42.7617	32.8946	61.3746	59.9352	47.186	46.1319	60.6549	46.659	-0.371468	1161.2	156.495	1097.52	1224.89	135.334	177.655	-0.385307	5.89305	19.7086	0.000677498	0.00183216
GL4_0075	CDS	70914	71237	.	cytochrome c552	P24059	cycB,blr6128	324	1291	1307	90	139	50.5524	45.3791	22.1774	25.3972	47.9658	23.7873	156.026	140.059	68.4488	78.3864	148.042	73.4176	-1.00201	1300.76	114.398	1229.43	1372.1	98.9299	129.867	-1.00094	5.94465	83.8929	5.18478e-07	3.30654e-06
GL4_0076	CDS	71418	72125	.	LSU ribosomal protein L19p	A7IIA9	rplS,Xaut_2510	708	20201	22555	3567	4371	791.022	783.111	878.965	798.641	787.066	838.803	1117.26	1106.09	1241.48	1128.02	1111.68	1184.75	0.0917663	21377.8	3985.41	20205.4	22550.1	3446.52	4524.29	0.0827344	10.2203	1.88954	0.19263	0.251938
GL4_0077	CDS	72311	73717	4.2.1.33	3-isopropylmalate dehydratase large subunit	Q6ND69	leuC,RPA0240	1407	7768	8459	1170	1483	304.176	293.697	288.306	270.964	298.936	279.635	216.188	208.74	204.909	192.583	212.464	198.746	-0.0958262	8118.57	1328.61	7673.34	8563.79	1148.96	1508.26	-0.105259	8.74199	3.41501	0.0876241	0.127071
GL4_0078	CDS	73759	74517	.	hypothetical protein	O31474	ycgJ,BSU03160	759	1360	1273	233	252	53.2543	44.1986	57.4148	46.0438	48.7265	51.7293	70.1637	58.2327	75.6454	60.6638	64.1982	68.1546	0.084992	1319.63	242.978	1247.26	1392	210.124	275.832	0.0648046	6.18631	0.325154	0.57831	0.645388
GL4_0079	CDS	74640	75272	2.7.2.8	acetylglutamate kinase	NA	NA	633	1676	1832	232	305	65.6281	63.6072	57.1684	55.7276	64.6176	56.448	103.678	100.485	90.3135	88.0373	102.082	89.1754	-0.19298	1754.55	268.496	1658.33	1850.77	232.191	304.801	-0.202055	6.5208	8.3654	0.012662	0.0232713
GL4_0080	CDS	75372	75980	.	hypothetical protein	NA	NA	609	7618	8492	1031	1269	298.302	294.843	254.055	231.863	296.573	242.959	489.823	484.142	417.167	380.728	486.983	398.947	-0.28702	8055.24	1153.18	7613.49	8497	997.254	1309.11	-0.298252	8.65784	25.9497	0.000209963	0.000650202
GL4_0081	CDS	76011	76331	.	hypothetical protein	NA	NA	321	1042	1157	124	174	40.8022	40.1711	30.5555	31.7922	40.4866	31.1738	127.11	125.144	95.1886	99.041	126.127	97.1148	-0.373724	1099.57	148.927	1039.27	1159.87	128.79	169.064	-0.378134	5.81736	17.693	0.00104122	0.00266222
GL4_0082	CDS	76371	76763	.	hypothetical protein	NA	NA	393	1310	1406	217	267	51.2964	48.8164	53.4722	48.7845	50.0564	51.1284	130.525	124.215	136.062	124.134	127.37	130.098	0.0303333	1358.72	242.157	1284.21	1433.24	209.414	274.9	0.0178072	6.21427	0.0526385	0.822127	0.855001
GL4_0083	CDS	76887	77492	4.2.1.33	3-isopropylmalate dehydratase small subunit	B8ENI5	leuD,Msil_1147	606	3909	4476	500	635	153.067	155.407	123.208	116.023	154.237	119.615	252.586	256.447	203.313	191.457	254.516	197.385	-0.365111	4190.11	567.962	3960.32	4419.9	491.165	644.759	-0.377052	7.70534	42.2268	2.07091e-05	8.26628e-05
GL4_0084	CDS	77499	77924	.	hypothetical protein	NA	NA	426	2132	2351	395	458	83.4839	81.6269	97.3342	83.6828	82.5554	90.5085	195.972	191.612	228.484	196.439	193.792	212.461	0.13204	2241.96	427.344	2119.01	2364.91	369.561	485.128	0.114749	6.96832	2.93725	0.110435	0.155417
GL4_0085	CDS	78040	79146	1.1.1.85	3-isopropylmalate dehydrogenase	Q2J3B4	leuB,RPB_0335	1107	3332	3840	812	1112	130.473	133.325	200.089	203.177	131.899	201.633	117.862	120.438	180.749	183.539	119.15	182.144	0.608143	3583.47	960.588	3386.95	3779.99	830.702	1090.47	0.606648	7.86258	117.839	7.31629e-08	6.0738e-07
GL4_0086	CDS	79191	79976	.	hypothetical protein	NA	NA	786	2472	2931	524	662	96.7975	101.765	129.122	120.956	99.281	125.039	123.152	129.471	164.277	153.889	126.312	159.083	0.330453	2698.42	593.499	2550.43	2846.4	513.249	673.75	0.32123	7.31468	28.2563	0.000143053	0.000461009
GL4_0087	CDS	80093	81121	1.2.1.11	aspartate-semialdehyde dehydrogenase	O67716	asd,aq_1866	1029	7338	8135	1057	1296	287.338	282.448	260.461	236.797	284.893	248.629	279.24	274.488	253.121	230.123	276.864	241.622	-0.195668	7737.81	1179.97	7313.46	8162.15	1020.42	1339.52	-0.207118	8.63392	12.4454	0.00374429	0.00795452
GL4_0088	CDS	81183	81821	4.2.1.1	carbonic anhydrase	P0ABE9	cynT,b0339,JW0330	639	2946	3376	459	546	115.358	117.215	113.105	99.7616	116.287	106.433	180.529	183.435	177.003	156.121	181.982	166.562	-0.127006	3159.33	503.503	2986.07	3332.59	435.422	571.585	-0.143487	7.37681	5.25094	0.0393908	0.063014
GL4_0089	CDS	82268	83473	1.2.1.2	NAD-dependent formate dehydrogenase	P33160		1206	361069	418623	16704	22444	14138.6	14534.6	4116.13	4100.82	14336.6	4108.47	11723.5	12051.9	3413.04	3400.35	11887.7	3406.7	-1.80273	389440	19544	368082	410797	16901.3	22186.6	-1.81055	13.7357	785.651	5.91618e-13	2.73541e-11
GL4_0090	CDS	83604	83738	.	hypothetical protein	NA	NA	135	6086	6873	246	336	238.313	238.631	60.6182	61.3918	238.472	61.005	1765.28	1767.64	449.024	454.754	1766.46	451.889	-1.96445	6477.64	290.801	6122.4	6832.88	251.481	330.122	-1.97118	7.98023	897.636	2.53241e-13	1.39752e-11
GL4_0091	CDS	83789	85192	.	permeases of the major facilitator superfamily	P37662	yhjX,b3547,JW3516	1404	17002	19095	1284	1621	665.757	662.98	316.398	296.179	664.368	306.288	474.186	472.208	225.354	210.953	473.197	218.154	-1.11354	18045.5	1455.28	17055.8	19035.1	1258.51	1652.06	-1.1262	9.53719	357.324	8.54797e-11	1.73513e-09
GL4_0092	CDS	85193	85330	.	hypothetical protein	NA	NA	138	1008	1260	96	118	39.4708	43.7473	23.6559	21.5602	41.609	22.608	286.02	317.009	171.42	156.233	301.515	163.826	-0.876058	1132.28	107.039	1070.18	1194.37	92.566	121.513	-0.896734	5.76785	63.4495	2.44276e-06	1.26864e-05
GL4_0093	CDS	86062	86175	.	hypothetical protein	NA	NA	114	2199	2613	174	318	86.1075	90.7235	42.8763	58.1029	88.4155	50.4896	755.329	795.82	376.108	509.675	775.575	442.891	-0.806918	2403.42	245.233	2271.61	2535.22	212.074	278.392	-0.786723	6.82651	61.2348	2.96181e-06	1.50303e-05
GL4_0094	CDS	86447	86770	.	quaternary ammonium compound-resistance protein SugE	Q7MZY0	sugE,plu4129	324	1215	1398	228	322	47.5764	48.5386	56.1828	58.8338	48.0575	57.5083	146.841	149.811	173.404	181.586	148.326	177.495	0.257418	1305.97	274.779	1234.35	1377.59	237.624	311.933	0.257229	6.22739	11.6684	0.00463799	0.00956028
GL4_0095	CDS	86767	87837	.	mesaconyl-CoA hydratase	A9WC34	mch,Caur_0173	1071	5266	5670	829	1007	206.204	196.863	204.279	183.993	201.533	194.136	192.534	183.812	190.736	171.795	188.173	181.266	-0.0536628	5472.73	920.636	5172.6	5772.86	796.152	1045.12	-0.0655086	8.19113	1.18332	0.296561	0.366725
GL4_0096	CDS	87965	88486	1.15.1.1	superoxide dismutase [Cu-Zn] precursor	O67149	sodC1,aq_1050	522	3359	3791	513	691	131.53	131.624	126.411	126.255	131.577	126.333	251.974	252.153	242.167	241.868	252.063	242.018	-0.0584375	3574.15	601.62	3378.14	3770.16	520.272	682.968	-0.0646248	7.57931	1.30893	0.273346	0.342222
GL4_0097	CDS	88585	88740	.	hypothetical protein	NA	NA	156	1623	1944	292	335	63.5527	67.4958	71.9534	61.209	65.5243	66.5812	407.389	432.665	461.24	392.366	420.027	426.803	0.0230314	1781.6	314.003	1683.9	1879.31	271.545	356.461	0.00171874	6.59976	0.000477305	0.982904	0.98765
GL4_0098	CDS	88956	89300	.	succinate dehydrogenase cytochrome b-556 subunit	Q59659	sdhC	345	6096	6573	1084	1480	238.704	228.215	267.115	270.416	233.46	268.765	691.897	661.493	774.245	783.815	676.695	779.03	0.202894	6339.91	1279.8	5992.22	6687.59	1106.75	1452.85	0.197495	8.51197	11.9557	0.00428135	0.0089302
GL4_0099	CDS	89303	89677	.	succinate dehydrogenase hydrophobic membrane anchor protein	Q59660	sdhD	375	1283	1581	209	275	50.2391	54.8924	51.5009	50.2462	52.5658	50.8735	133.971	146.38	137.336	133.99	140.175	135.663	-0.0468684	1430.04	241.994	1351.61	1508.46	209.273	274.716	-0.0569504	6.26655	0.452124	0.513176	0.584655
GL4_0100	CDS	89684	91525	1.3.99.1	succinate dehydrogenase flavoprotein subunit	Q6ZDY8	SDH1,Os07g0134800,LOC_Os07g04240,P0507H12.27	1842	11932	13322	1612	2196	467.228	462.541	397.222	401.239	464.884	399.23	253.653	251.108	215.647	217.828	252.38	216.738	-0.218714	12626.9	1900.35	11934.4	13319.3	1643.39	2157.3	-0.22611	9.32689	15.5098	0.00171854	0.00404313
GL4_0101	CDS	91590	92378	1.3.99.1	succinate dehydrogenase iron-sulfur protein	Q59662	sdhB	789	5824	6877	894	1158	228.054	238.77	220.296	211.582	233.412	215.939	289.041	302.623	279.209	268.165	295.832	273.687	-0.111861	6341.68	1026.54	5993.9	6689.46	887.74	1165.35	-0.121018	8.38158	4.25061	0.0599541	0.091386
GL4_0102	CDS	92472	92963	.	hypothetical protein	NA	NA	492	700	844	190	274	27.4103	29.3037	46.819	50.0635	28.357	48.4412	55.712	59.5604	95.1605	101.755	57.6362	98.4578	0.762293	771.312	231.74	729.013	813.612	200.406	263.075	0.771077	5.62426	70.5134	1.36953e-06	7.80678e-06
GL4_0103	CDS	93091	93576	.	putative exported protein	NA	NA	486	710	840	144	165	27.8019	29.1649	35.4839	30.1477	28.4834	32.8158	57.2055	60.01	73.012	62.0324	58.6077	67.5222	0.201072	774.43	154.706	731.96	816.9	133.787	175.625	0.182395	5.44578	3.13998	0.0999643	0.142702
GL4_0104	CDS	93622	94122	.	hypothetical protein	NA	NA	501	919	1038	181	269	35.9858	36.0394	44.6012	49.1499	36.0126	46.8756	71.8279	71.935	89.0244	98.1037	71.8815	93.564	0.37574	978.357	224.712	924.703	1032.01	194.327	255.096	0.383689	5.84443	19.9476	0.000645053	0.00175727
GL4_0105	CDS	94316	95284	1.1.1.37	malate dehydrogenase	Q07UX5	mdh,RPE_0300	969	6782	7561	1683	2148	265.567	262.518	414.718	392.469	264.042	403.593	274.062	270.917	427.985	405.024	272.49	416.505	0.610306	7171.69	1918.25	6778.39	7564.99	1658.87	2177.62	0.603507	8.89273	117.654	7.38411e-08	6.08901e-07
GL4_0106	CDS	95317	96483	6.2.1.5	succinyl-CoA ligase [ADP-forming] beta chain	A7HT39	sucC,Plav_1452	1167	6465	7268	3337	4094	253.154	252.345	822.289	748.029	252.75	785.159	216.927	216.234	704.618	640.985	216.581	672.801	1.63077	6865.23	3730.34	6488.74	7241.72	3225.94	4234.74	1.62602	9.49028	729.303	9.49599e-13	3.92661e-11
GL4_0107	CDS	96542	97414	6.2.1.5	succinyl-CoA ligase [ADP-forming] alpha chain	Q1RH56	sucD,RBE_1227	873	2895	3359	2541	3262	113.361	116.625	626.142	596.012	114.993	611.077	129.852	133.591	717.23	682.717	131.722	699.973	2.40096	3124.22	2905.1	2952.89	3295.56	2512.29	3297.92	2.40106	8.89984	1698.4	4.28862e-15	5.65355e-13
GL4_0108	CDS	97493	100381	1.2.4.2	2-oxoglutarate dehydrogenase E1 component	A6WXF0	sucA,odhA,Oant_0933	2889	28222	32405	7834	10043	1105.1	1125.1	1930.42	1834.99	1115.1	1882.71	382.521	389.444	668.197	635.165	385.983	651.681	0.754109	30290.3	8952.08	28629.1	31951.4	7741.62	10162.5	0.747483	11.0908	161.934	1.10674e-08	1.15859e-07
GL4_0109	CDS	100454	101758	2.3.1.61	dihydrolipoamide succinyltransferase component (E2) of 2-oxoglutarate dehydrogenase complex	Q8GCY1	sucB	1305	8911	9849	3224	4009	348.933	341.958	794.444	732.499	345.445	763.471	267.382	262.037	608.769	561.302	264.709	585.035	1.14114	9382.36	3628.05	8867.83	9896.9	3137.48	4118.61	1.13527	9.61363	371.976	6.6486e-11	1.38332e-09
GL4_0110	CDS	101782	103185	1.8.1.4	dihydrolipoamide dehydrogenase of 2-oxoglutarate dehydrogenase	Q9M5K2	LPD2,At3g17240,MGD8.7	1404	9539	10569	3846	4909	373.524	366.956	947.715	896.941	370.24	922.328	266.043	261.365	675.01	638.847	263.704	656.929	1.31355	10055.9	4384.92	9504.43	10607.4	3792.01	4977.83	1.30861	9.8354	510.154	9.13137e-12	2.64333e-10
GL4_0111	CDS	103219	104193	.	tyrosine recombinase XerC	B8I9N8	xerC,Mnod_0247	975	1142	1242	231	306	44.7179	43.1223	56.922	55.9103	43.9201	56.4162	45.8645	44.228	58.3816	57.3439	45.0463	57.8627	0.35427	1192.4	268.473	1127.01	1257.79	232.171	304.775	0.354974	6.12611	22.5473	0.00038711	0.0011206
GL4_0112	CDS	104290	106509	.	helicase PriA essential for oriC/DnaA-independent DNA replication	P05445	priA	2220	1367	1483	233	296	53.5284	51.4899	57.4148	54.0832	52.5091	55.749	24.1119	23.1936	25.8625	24.3618	23.6528	25.1122	0.0829737	1425.56	264.592	1347.38	1503.74	228.815	300.369	0.0763502	6.30013	1.08322	0.317066	0.389057
GL4_0113	CDS	106735	107295	3.6.3.14	ATP synthase delta chain	Q7CWL8	atpH,Atu2625,AGR_C_4759	561	6744	7782	1287	1662	264.079	270.192	317.137	303.67	267.135	310.403	470.728	481.625	565.306	541.301	476.177	553.304	0.216154	7256.91	1475.63	6858.93	7654.88	1276.1	1675.16	0.208018	8.71327	13.6469	0.00272696	0.00601594
GL4_0114	CDS	107295	108824	3.6.3.14	ATP synthase alpha chain	Q11DD7	atpA,Meso_3216	1530	22711	25797	3548	4187	889.307	895.673	874.283	765.022	892.49	819.652	581.247	585.407	571.427	500.014	583.327	535.72	-0.122605	24242.5	3892.23	22913.1	25572	3365.94	4418.52	-0.132824	10.3022	4.22821	0.0605446	0.092244
GL4_0115	CDS	108833	109720	3.6.3.14	ATP synthase gamma chain	B8IN02	atpG,Mnod_7381	888	12621	14525	2194	2877	494.208	504.309	540.636	525.667	499.258	533.151	556.54	567.915	608.824	591.967	562.228	600.396	0.0945963	13562	2535.65	12818.3	14305.8	2192.79	2878.51	0.0869021	9.56454	2.29614	0.153776	0.206837
GL4_0116	CDS	109740	111227	3.6.3.14	ATP synthase beta chain	A7IH31	atpD,Xaut_2080	1488	24026	27329	3442	3864	940.799	948.865	848.163	706.005	944.832	777.084	632.258	637.678	570.002	474.466	634.968	522.234	-0.281498	25664.4	3687.17	24256.9	27071.8	3188.61	4185.73	-0.293131	10.3154	16.5424	0.00134917	0.00329521
GL4_0117	CDS	111227	111628	3.6.3.14	ATP synthase epsilon chain	A7HT53	atpC,Plav_1466	402	4397	4971	610	787	172.176	172.593	150.314	143.796	172.385	147.055	428.298	429.337	373.914	357.7	428.817	365.807	-0.228701	4682.6	698.862	4425.81	4939.4	604.365	793.358	-0.238173	7.90673	17.8485	0.0010062	0.00258061
GL4_0118	CDS	111729	112235	.	adenosine (5')-pentaphospho-(5'')-adenosine pyrophosphohydrolase	Q8UBS8	rppH,ialA,nudH,Atu2772,AGR_C_5030	507	1760	1959	272	388	68.9173	68.0166	67.0251	70.8929	68.467	68.959	135.932	134.155	132.199	139.828	135.043	136.014	0.0102545	1859.58	329.667	1757.6	1961.56	285.091	374.243	0.0101528	6.66352	0.0224789	0.883136	0.904325
GL4_0119	CDS	112320	113504	.	putative periplasmic protein YibQ, distant homology with nucleoside diphosphatase and polysaccharide deacetylase	P37691	yibQ,b3614,JW5645	1185	9003	9854	1698	2101	352.535	342.132	418.414	383.881	347.333	401.147	297.498	288.719	353.092	323.95	293.108	338.521	0.207153	9433.24	1905.29	8915.91	9950.56	1647.66	2162.91	0.198298	9.09012	11.589	0.00474247	0.00975753
GL4_0120	CDS	113707	115074	3.4.21.102	carboxyl-terminal protease	Q44879	ctpA,BARBAKC583_0324	1368	27929	31932	5761	6687	1093.63	1108.68	1419.6	1221.81	1101.16	1320.7	799.438	810.439	1037.72	893.133	804.939	965.426	0.261989	29911	6272.26	28270.7	31551.4	5424.15	7120.36	0.252425	10.7912	14.0373	0.00246835	0.00553716
GL4_0121	CDS	115071	116435	.	periplasmic septal ring factor with murein hydrolase activity EnvC/YibP	P37690	envC,yibP,b3613,JW5646	1365	12546	14332	2590	2849	491.271	497.608	638.217	520.551	494.439	579.384	359.905	364.548	467.558	381.356	362.227	424.457	0.228143	13430.8	2746.85	12694.2	14167.3	2375.44	3118.27	0.216355	9.61165	8.33994	0.0127693	0.0234209
GL4_0122	CDS	116521	117006	.	LSU m3Psi1915 methyltransferase RlmH	B8IEM4	rlmH,Mnod_4731	486	2722	3078	282	377	106.587	106.868	69.4892	68.883	106.728	69.1861	219.315	219.894	142.982	141.735	219.604	142.358	-0.621835	2899.28	329.42	2740.28	3058.28	284.877	373.963	-0.631591	7.12143	101.82	1.71297e-07	1.29308e-06
GL4_0123	CDS	117046	117432	.	Iojap protein	Q5NLX3	rsfS,ZMO1663	387	21218	23651	2368	3033	830.845	821.164	583.512	554.17	826.005	568.841	2146.89	2121.87	1507.78	1431.96	2134.38	1469.87	-0.537818	22435.2	2704.26	21204.9	23665.6	2338.61	3069.92	-0.546406	10.0249	88.7127	3.77652e-07	2.54985e-06
GL4_0124	CDS	117635	118243	2.7.7.18	nicotinate-nucleotide adenylyltransferase	A9W6Q3	nadD,Mext_2869	609	720	701	121	151	28.1934	24.3388	29.8163	27.5897	26.2661	28.703	46.2946	39.9651	48.9594	45.3034	43.1299	47.1314	0.125222	711.758	136.067	672.725	750.791	117.669	154.466	0.118946	5.30782	1.04859	0.324627	0.397018
GL4_0125	CDS	118276	119562	1.2.1.41	gamma-glutamyl phosphate reductase	Q2K2X4	proA,RHE_CH04069	1287	3189	3581	526	692	124.873	124.333	129.615	126.438	124.603	128.026	97.0268	96.6065	100.711	98.2422	96.8166	99.4765	0.0387059	3384.57	608.968	3198.95	3570.18	526.626	691.309	0.0315113	7.53477	0.318082	0.582422	0.648673
GL4_0126	CDS	119598	120725	2.7.2.11	glutamate 5-kinase	Q2J3J7	proB,RPB_0252	1128	3133	3472	494	490	122.681	120.548	121.729	89.5296	121.614	105.629	108.759	106.869	107.916	79.3702	107.814	93.6432	-0.201296	3302.97	494.824	3121.84	3484.11	427.916	561.731	-0.232715	7.41303	7.01655	0.0201425	0.0347522
GL4_0127	CDS	120722	121765	.	GTP-binding protein Obg	A8HS51	obg,AZC_4141	1044	2977	3399	477	589	116.572	118.013	117.54	107.618	117.293	112.579	111.659	113.04	112.586	103.083	112.349	107.835	-0.0586401	3186.54	533.698	3011.78	3361.29	461.534	605.862	-0.0718421	7.41236	1.47205	0.246742	0.313274
GL4_0128	CDS	121829	122359	.	50S ribosomal protein acetyltransferase	P05332	p20	531	943	970	135	187	36.9256	33.6785	33.2661	34.1674	35.302	33.7168	69.5397	63.4246	62.648	64.3454	66.4821	63.4967	-0.0652794	957.489	160.928	904.98	1010	139.168	182.687	-0.0667819	5.68952	0.476558	0.502201	0.574116
GL4_0129	CDS	122447	122707	.	LSU ribosomal protein L27p	A8HRT6	rpmA,AZC_4093	261	4209	4726	527	610	164.814	164.087	129.861	111.455	164.451	120.658	631.472	628.686	497.552	427.032	630.079	462.292	-0.445899	4466.89	570.314	4221.92	4711.85	493.199	647.429	-0.463368	7.7704	51.6287	7.35517e-06	3.36117e-05
GL4_0130	CDS	122720	123322	.	LSU ribosomal protein L21p	A9IM54	rplU,BT_0151	603	13803	15357	2530	3272	540.492	533.196	623.432	597.839	536.844	610.635	896.338	884.239	1033.88	991.441	890.288	1012.66	0.185612	14581.2	2903.47	13781.6	15380.8	2510.88	3296.06	0.177785	9.71254	9.71915	0.00822048	0.0159105
GL4_0132	CDS	123896	124819	.	hypothetical protein	NA	NA	924	1372	1604	239	348	53.7242	55.691	58.8933	63.5843	54.7076	61.2388	58.143	60.2716	63.7374	68.8142	59.2073	66.2758	0.160148	1487.03	293.155	1405.48	1568.58	253.516	332.794	0.163326	6.38683	4.63382	0.0508398	0.079013
GL4_0133	CDS	124816	124941	.	hypothetical protein	NA	NA	126	163	187	29	38	6.38268	6.49265	7.14605	6.94311	6.43767	7.04458	50.6562	51.529	56.7147	55.1041	51.0926	55.9094	0.127589	174.949	33.5004	165.354	184.543	28.9707	38.0302	0.121228	3.29755	0.412947	0.533543	0.603112
GL4_0134	CDS	125200	125331	.	hypothetical protein	NA	NA	132	258	292	38	46	10.1026	10.1383	9.36379	8.40482	10.1205	8.88431	76.5352	76.805	70.9378	63.6729	76.6701	67.3054	-0.18536	274.95	42.0278	259.871	290.028	36.345	47.7106	-0.203534	3.88297	1.44606	0.250739	0.317622
GL4_0135	CDS	125515	129576	.	hypothetical protein	NA	NA	4062	7808	8442	990	1434	305.742	293.107	243.951	262.011	299.424	252.981	75.2689	72.1582	60.057	64.503	73.7136	62.28	-0.239621	8131.55	1206.84	7685.61	8577.49	1043.65	1370.02	-0.246247	8.69021	15.611	0.00167756	0.0039551
GL4_0136	CDS	129696	130868	.	integrase	Q8R890	TTE2127	1173	1941	2283	395	548	76.0048	79.2659	97.3342	100.127	77.6354	98.7306	64.7952	67.5754	82.9788	85.3598	66.1853	84.1693	0.342188	2110.16	471.058	1994.44	2225.89	407.364	534.752	0.342638	6.96088	29.0751	0.000125505	0.000412853
GL4_0137	CDS	132067	133371	.	TnpY	NA	NA	1305	1712	1804	324	451	67.0377	62.635	79.8387	82.4038	64.8364	81.1212	51.3699	47.9962	61.1791	63.1447	49.683	62.1619	0.317551	1759.51	387.186	1663.02	1856	334.832	439.539	0.321938	6.6864	22.3811	0.000399478	0.00114709
GL4_0138	CDS	133524	136073	.	hypothetical protein	NA	NA	2550	7536	8503	1170	1474	295.091	295.225	288.306	269.32	295.158	278.813	115.722	115.774	113.061	105.616	115.748	109.338	-0.0814653	8017.28	1324.46	7577.6	8456.95	1145.38	1503.55	-0.0916557	8.72939	2.60294	0.130816	0.179804
GL4_0139	CDS	136070	137848	2.1.1.72	type III restriction-modification system methylation subunit	P40814	mod,STM0357	1779	8870	10706	1635	1966	347.328	371.713	402.89	359.215	359.52	381.052	195.238	208.945	226.47	201.92	202.091	214.195	0.0835141	9768.24	1808.55	9232.54	10303.9	1564	2053.09	0.0727771	9.0834	1.25135	0.283665	0.353179
GL4_0140	CDS	138470	141175	5.4.99.15	malto-oligosyltrehalose synthase	Q44315	treY	2706	4306	4946	741	1008	168.612	171.725	182.594	184.175	170.169	183.385	62.3106	63.461	67.4775	68.0618	62.8858	67.7696	0.106277	4622.9	873.426	4369.38	4876.43	755.325	991.526	0.102	8.01267	3.24729	0.0949127	0.136133
GL4_0141	CDS	141172	143001	3.2.1.141	malto-oligosyltrehalose trehalohydrolase	P95867	treZ,SSO2093	1830	1454	1585	253	366	56.9351	55.0313	62.3432	66.8732	55.9832	64.6082	31.1121	30.0717	34.0673	36.5427	30.5919	35.305	0.200613	1520.01	309.146	1436.65	1603.36	267.345	350.947	0.208302	6.43334	8.24814	0.0131647	0.0241064
GL4_0142	CDS	143040	145268	2.4.1.18	1,4-alpha-glucan (glycogen) branching enzyme, GH-13-type	Q11EX1	glgB,Meso_2677	2229	3198	3500	602	781	125.226	121.52	148.342	142.699	123.373	145.521	56.1803	54.5178	66.551	64.0194	55.3491	65.2852	0.234296	3350.37	691.719	3166.64	3534.11	598.188	785.25	0.22997	7.59543	17.2077	0.00115993	0.00291427
GL4_0143	CDS	145265	148636	5.4.99.16	trehalose synthase	A0R6E0	treS,MSMEG_6515,MSMEI_6343	3372	4866	5468	905	1245	190.541	189.849	223.006	227.478	190.195	225.242	56.5067	56.3017	66.1347	67.461	56.4042	66.7978	0.240082	5166.15	1073.01	4882.84	5449.47	927.922	1218.1	0.238611	8.23162	17.9134	0.000991984	0.002554
GL4_0144	CDS	148633	150675	3.2.1.1	alpha-amylase	Q3J3M8	glgE,RHOS4_10380,RSP_2445	2043	3178	3575	736	996	124.443	124.124	181.362	181.983	124.283	181.672	60.9118	60.7559	88.7723	89.0762	60.8338	88.9243	0.540315	3375.93	865.166	3190.79	3561.07	748.182	982.149	0.541783	7.74231	99.3244	1.97681e-07	1.46893e-06
GL4_0145	CDS	151440	151727	.	hypothetical protein	NA	NA	288	284	282	54	85	11.1207	9.79106	13.3064	15.5307	10.4559	14.4185	38.6137	33.9967	46.2029	53.9259	36.3052	50.0644	0.452941	283.426	69.3527	267.883	298.969	59.9752	78.7303	0.474795	4.06283	8.86004	0.0107739	0.020275
GL4_0146	CDS	151858	151989	.	hypothetical protein	NA	NA	132	281	327	47	76	11.0033	11.3535	11.5815	13.8862	11.1784	12.7339	83.3581	86.0111	87.7389	105.199	84.6846	96.4688	0.185905	303.832	61.3666	287.17	320.494	53.0689	69.6643	0.198169	4.10058	1.56711	0.23282	0.297299
GL4_0147	CDS	152061	154217	.	phospholipase D/transphosphatidylase	Q54UK0	pldA,pld1,DDB_G0281031	2157	3261	3522	440	628	127.693	122.284	108.423	114.744	124.988	111.583	59.1993	56.6917	50.2656	53.1962	57.9455	51.7309	-0.160734	3393.8	533.032	3207.69	3579.92	460.958	605.105	-0.164553	7.47174	7.18425	0.0189739	0.0330184
GL4_0148	CDS	154214	154918	.	endonuclease/Exonuclease/phosphatase family protein	P0AAW4	ybhP,SF0740,S0781	705	1169	1323	220	277	45.7752	45.9346	54.2114	50.6117	45.8549	52.4115	64.9293	65.1555	76.8957	71.7896	65.0424	74.3426	0.190073	1245.77	248.608	1177.45	1314.09	214.993	282.224	0.180925	6.13545	5.68493	0.0331504	0.0543099
GL4_0149	CDS	155201	156130	.	Mll4591 protein	NA	NA	930	1951	2110	407	416	76.3964	73.2593	100.291	76.0088	74.8279	88.15	82.1467	78.7735	107.84	81.7299	80.4601	94.7849	0.233706	2031.53	413.066	1920.12	2142.94	357.213	468.918	0.207903	6.85759	5.83719	0.0312431	0.0516171
GL4_0150	CDS	156130	156765	.	hypothetical protein	NA	NA	636	910	964	166	209	35.6334	33.4701	40.905	38.1871	34.5518	39.5461	56.0273	52.626	64.316	60.0427	54.3267	62.1793	0.191478	937.603	187.574	886.184	989.022	162.211	212.936	0.184487	5.72389	4.30034	0.058667	0.0897117
GL4_0151	CDS	156749	157213	.	hypothetical protein	A3DIJ8	Cthe_2577	465	932	1045	176	258	36.4948	36.2825	43.3692	47.1401	36.3887	45.2546	78.4835	78.0268	93.267	101.377	78.2552	97.3218	0.311006	988.443	216.76	934.237	1042.65	187.45	246.069	0.316923	5.83882	13.7845	0.00263237	0.0058695
GL4_0152	CDS	157319	157618	.	hypothetical protein	NA	NA	300	775	832	158	209	30.3471	28.8871	38.9337	38.1871	29.6171	38.5604	101.157	96.2903	129.779	127.29	98.7237	128.535	0.377331	803.882	183.485	759.797	847.967	158.675	208.295	0.374642	5.55394	17.0315	0.00120689	0.00300729
GL4_0153	CDS	157697	157885	.	hypothetical protein	NA	NA	189	763	835	192	202	29.8772	28.9913	47.3118	36.9081	29.4342	42.11	158.08	153.393	250.327	195.281	155.737	222.804	0.513893	799.189	197.477	755.361	843.017	170.775	224.179	0.489084	5.58056	22.6757	0.000377864	0.00109861
GL4_0154	CDS	158061	160607	6.5.1.1	ATP-dependent DNA ligase clustered with Ku protein, LigD	Q9I1X7	ligD,PA2138	2547	2056	2204	342	480	80.5079	76.523	84.2741	87.7025	78.5155	85.9883	31.6089	30.0444	33.0876	34.4336	30.8266	33.7606	0.127219	2131.42	410.587	2014.53	2248.31	355.069	466.104	0.129978	6.89944	4.04446	0.0656629	0.0990239
GL4_0155	CDS	160614	161489	.	Ku domain protein	C1F735	ku,ACP_3505	876	1033	1194	140	214	40.4498	41.4558	34.4982	39.1007	40.9528	36.7994	46.1755	47.3239	39.3815	44.6355	46.7497	42.0085	-0.150871	1112.99	176.778	1051.96	1174.03	152.875	200.681	-0.148361	5.88479	2.59918	0.13107	0.18008
GL4_0156	CDS	161898	162026	.	hypothetical protein	NA	NA	129	678	806	83	142	26.5488	27.9844	20.4525	25.9453	27.2666	23.1989	205.805	216.933	158.546	201.127	211.369	179.837	-0.231887	741.377	112.257	700.719	782.034	97.078	127.436	-0.217291	5.2909	3.10737	0.101564	0.144861
GL4_0157	CDS	162664	163290	.	cobalt-zinc-cadmium resistance protein CzcD	NA	NA	627	883	1031	121	199	34.5761	35.7964	29.8163	36.36	35.1863	33.0881	55.1453	57.0915	47.5539	57.9904	56.1184	52.7722	-0.0870968	956.453	159.704	904.001	1008.91	138.11	181.298	-0.0762301	5.68509	0.53468	0.477701	0.550265
GL4_0158	CDS	163881	164366	.	hypothetical protein	P21362	yciF,b1258,JW1250	486	801	893	148	158	31.3652	31.005	36.4695	28.8687	31.1851	32.6691	64.5375	63.7963	75.0402	59.4007	64.1669	67.2204	0.0660646	847.011	153.287	800.561	893.462	132.56	174.014	0.0398924	5.53925	0.145639	0.708942	0.757889
GL4_0159	CDS	164562	164747	.	hypothetical protein	NA	NA	186	660	790	166	227	25.844	27.4288	40.905	41.476	26.6364	41.1905	138.946	147.467	219.919	222.989	143.207	221.454	0.625372	724.393	196.407	684.667	764.12	169.85	222.964	0.622972	5.47858	43.7492	1.73093e-05	7.05997e-05
GL4_0160	CDS	164787	164924	.	hypothetical protein	NA	NA	138	319	317	61	72	12.4913	11.0063	15.0314	13.1554	11.7488	14.0934	90.5164	79.7555	108.923	95.3288	85.1359	102.126	0.259718	318.495	66.579	301.029	335.962	57.5765	75.5814	0.247761	4.17752	2.54475	0.134824	0.184655
GL4_0161	CDS	165006	165437	.	general stress protein	P80238	ydaG,yzzA,BSU04220	432	960	1053	285	327	37.5913	36.5602	70.2285	59.7473	37.0757	64.9879	87.0168	84.6302	162.566	138.304	85.8235	150.435	0.802541	1006.71	306.528	951.5	1061.92	265.081	347.975	0.790362	6.03307	95.3334	2.50274e-07	1.78026e-06
GL4_0162	CDS	166078	166758	.	hypothetical protein	NA	NA	681	1362	1584	317	405	53.3326	54.9966	78.1138	73.999	54.1646	76.0564	78.3151	80.7586	114.704	108.662	79.5368	111.683	0.484554	1472.16	361.131	1391.43	1552.89	312.301	409.962	0.47865	6.48042	49.5191	9.14874e-06	4.06082e-05
GL4_0163	CDS	166837	167184	.	hypothetical protein	NA	NA	348	731	833	131	198	28.6242	28.9218	32.2804	36.1773	28.773	34.2289	82.2534	83.1087	92.7599	103.958	82.681	98.3588	0.247748	781.797	164.271	738.922	824.671	142.059	186.483	0.255269	5.47899	6.6616	0.0229065	0.0388861
GL4_0164	CDS	167351	167539	.	hypothetical protein	NA	NA	189	445	482	78	87	17.4251	16.7351	19.2204	15.8961	17.0801	17.5582	92.1964	88.5453	101.695	84.1062	90.3709	92.9008	0.0394033	463.707	82.6589	438.277	489.137	71.4822	93.8357	0.018068	4.66831	0.0174643	0.8969	0.916164
GL4_0165	CDS	167766	168347	.	RNA polymerase sigma-70 factor, ECF subfamily	Q3IYV6	rpoE,RHOS4_27100,RSP_1092	582	6658	8080	752	910	260.711	280.538	185.305	166.269	270.625	175.787	447.957	482.024	318.393	285.686	464.991	302.039	-0.620796	7353.59	833.478	6950.31	7756.86	720.779	946.177	-0.635162	8.41954	90.7451	3.31909e-07	2.29238e-06
GL4_0166	CDS	168344	169006	.	transcriptional activator chrR	P40685	chrR,RHOS4_27110,RSP_1093	663	5887	6596	591	676	230.521	229.014	145.632	123.514	229.767	134.573	347.693	345.42	219.656	186.296	346.557	202.976	-0.76885	6240.9	636.164	5898.65	6583.16	550.145	722.183	-0.788201	8.14863	137.934	2.88786e-08	2.72342e-07
GL4_0167	CDS	169007	169774	.	oxidoreductase, short-chain dehydrogenase/reductase family	P25970	MXAN_5909	768	3355	3869	406	496	131.374	134.332	100.045	90.6259	132.853	95.3353	171.059	174.911	130.267	118.002	172.985	124.135	-0.475486	3609.52	451.631	3411.57	3807.47	390.563	512.698	-0.49251	7.46278	62.9762	2.54423e-06	1.30908e-05
GL4_0168	CDS	169784	171007	2.1.1.79	cyclopropane-fatty-acyl-phospholipid synthase, plant type	O53732	ufaA1,Rv0447c,RVBD_0447c,LH57_02385,P425_00460	1224	4160	4517	594	642	162.895	156.831	146.371	117.302	159.863	131.836	133.085	128.13	119.584	95.835	130.607	107.71	-0.275758	4341.19	621.233	4103.11	4579.26	537.233	705.234	-0.298818	7.78006	16.2398	0.00144691	0.00350131
GL4_0169	CDS	171004	171792	.	hypothetical protein	NA	NA	789	3467	3961	382	532	135.759	137.526	94.1308	97.2036	136.643	95.6672	172.065	174.304	119.304	123.198	173.185	121.251	-0.510769	3712.16	456.468	3508.58	3915.73	394.747	518.189	-0.517589	7.49486	72.902	1.1388e-06	6.65101e-06
GL4_0170	CDS	171789	173132	.	amine oxidase, flavin-containing	NA	NA	1344	8425	9459	928	1136	329.902	328.417	228.674	207.563	329.16	218.118	245.463	244.358	170.144	154.436	244.911	162.29	-0.590694	8940.64	1034.99	8450.33	9430.95	895.04	1174.93	-0.604701	8.70294	102.747	1.62548e-07	1.23544e-06
GL4_0171	CDS	173243	173647	.	hypothetical protein	NA	NA	405	2741	2961	304	370	107.331	102.806	74.9104	67.604	105.068	71.2572	265.014	253.842	184.964	166.923	259.428	175.944	-0.557596	2852.74	337.347	2696.3	3009.19	291.733	382.962	-0.573943	7.113	76.5042	8.70557e-07	5.26924e-06
GL4_0172	CDS	174120	175115	.	hypothetical protein	Q7NDN8	glvI,glr4197	996	3197	3739	591	736	125.187	129.818	145.632	134.477	127.503	140.054	125.689	130.34	146.217	135.017	128.015	140.617	0.134459	3464.57	664.422	3274.57	3654.57	574.582	754.262	0.123536	7.60273	4.37668	0.0567551	0.0872289
GL4_0173	CDS	175213	177060	.	ABC transporter, ATP-binding protein	Q45978	hfaC,CC_2631	1848	2172	2468	317	447	85.0502	85.6891	78.1138	81.673	85.3697	79.8934	46.0228	46.3686	42.2693	44.1953	46.1957	43.2323	-0.0935542	2319.28	381.607	2192.09	2446.48	330.008	433.206	-0.0974627	6.94824	2.32848	0.15113	0.203753
GL4_0174	CDS	177234	178934	.	predicted membrane protein	NA	NA	1701	3614	3953	568	669	141.515	137.248	139.964	122.235	139.382	131.1	83.1954	80.6869	82.2834	71.8609	81.9412	77.0721	-0.0872802	3785.15	620.225	3577.57	3992.73	536.361	704.089	-0.103434	7.64871	2.76115	0.12064	0.167407
GL4_0175	CDS	178984	179376	.	hypothetical protein	NA	NA	393	622	707	142	180	24.356	24.5471	34.991	32.8884	24.4515	33.9397	61.9746	62.4608	89.0357	83.6856	62.2177	86.3606	0.466656	664.348	161.064	627.915	700.781	139.285	182.842	0.461613	5.30016	22.2134	0.00041242	0.00117749
GL4_0176	CDS	179659	179826	.	hypothetical protein	NA	NA	168	298	316	42	60	11.669	10.9715	10.3495	10.9628	11.3202	10.6561	69.458	65.3068	61.6039	65.2548	67.3824	63.4294	-0.0859068	307.211	50.9608	290.363	324.058	44.0702	57.8515	-0.0856604	4.06045	0.286942	0.601288	0.665898
GL4_0177	CDS	179981	180847	.	transcription regulator [contains diacylglycerol kinase catalytic domain]	Q87IB3	VPA0693	867	1063	1195	212	250	41.6245	41.4905	52.2401	45.6784	41.5575	48.9593	48.0098	47.8552	60.2539	52.6856	47.9325	56.4697	0.232009	1128.9	231.253	1066.99	1190.8	199.984	262.522	0.21864	6.00353	7.11842	0.0194229	0.033659
GL4_0178	CDS	181097	181639	.	hypothetical protein	NA	NA	543	1842	2163	322	406	72.1282	75.0995	79.3458	74.1817	73.6139	76.7638	132.833	138.305	146.125	136.615	135.569	141.37	0.0600146	2000.89	364.196	1891.16	2110.62	314.951	413.441	0.0481878	6.78121	0.523535	0.482235	0.555104
GL4_0179	CDS	181782	181901	.	hypothetical protein	NA	NA	120	208	281	45	62	8.14477	9.75634	11.0887	11.3282	8.95055	11.2085	67.8731	81.3028	92.4059	94.402	74.588	93.4039	0.320691	243.925	53.4736	230.548	257.302	46.2431	60.704	0.316261	3.81151	3.14811	0.0995705	0.142262
GL4_0180	CDS	181931	184306	.	potassium efflux system KefA protein / Small-conductance mechanosensitive channel	P77338	mscK,aefA,kefA,b0465,JW0454	2376	4189	4768	978	1190	164.031	165.545	240.994	217.429	164.788	229.212	69.0366	69.6739	101.429	91.5106	69.3553	96.4696	0.470294	4476.44	1087.23	4230.95	4721.93	940.223	1234.24	0.464337	8.12422	63.341	2.46561e-06	1.27851e-05
GL4_0181	CDS	184490	184636	.	hypothetical protein	NA	NA	147	421	456	155	191	16.4853	15.8323	38.1944	34.8983	16.1588	36.5464	112.145	107.703	259.826	237.403	109.924	248.615	1.17013	438.668	173.188	414.611	462.724	149.77	196.605	1.16487	4.92514	115.94	8.04694e-08	6.5497e-07
GL4_0182	CDS	184723	185178	.	hypothetical protein	NA	NA	456	1135	1290	229	280	44.4438	44.7889	56.4292	51.1598	44.6164	53.7945	97.4645	98.2212	123.748	112.193	97.8429	117.97	0.267393	1212.21	254.694	1145.73	1278.69	220.255	289.132	0.255198	6.11836	10.9602	0.00567503	0.0114221
GL4_0183	CDS	185330	186109	.	hypothetical protein	NA	NA	780	836	922	123	186	32.7357	32.0119	30.3091	33.9847	32.3738	32.1469	41.9689	41.0409	38.8579	43.5702	41.5049	41.214	-0.00990692	879.132	154.311	830.92	927.345	133.446	175.176	-0.00419336	5.58173	0.00184471	0.966398	0.972533
GL4_0184	CDS	186189	186398	.	hypothetical protein	NA	NA	210	237	277	34	63	9.28034	9.61746	8.37813	11.511	9.4489	9.94454	44.1921	45.7974	39.8959	54.8141	44.9948	47.355	0.0721946	256.85	48.3493	242.764	270.935	41.8117	54.8868	0.0966095	3.83995	0.282725	0.603945	0.667729
GL4_0185	CDS	186551	187039	.	hypothetical protein	Q6AKK4	rimK,DP2392	489	730	863	138	199	28.585	29.9634	34.0054	36.36	29.2742	35.1827	58.4561	61.2749	69.5406	74.3558	59.8655	71.9482	0.261249	795.93	168.343	752.281	839.58	145.581	191.106	0.264746	5.50759	7.39421	0.0176211	0.0310538
GL4_0186	CDS	187119	188012	.	ribosomal protein S6 glutaminyl transferase	Q2N9S1	rimK,ELI_07390	894	1666	1856	235	398	65.2365	64.4404	57.9077	72.72	64.8385	65.3138	72.9715	72.081	64.7737	81.3423	72.5262	73.058	0.0103959	1761.05	315.564	1664.47	1857.62	272.895	358.233	0.0256132	6.58912	0.0848924	0.775399	0.814806
GL4_0187	CDS	188009	189055	.	predicted deacylase	E1V7W0	doeB,HELO_3664	1047	2715	2917	319	440	106.313	101.278	78.6066	80.394	103.796	79.5003	101.54	96.732	75.0779	76.7851	99.1362	75.9315	-0.380317	2818	379.22	2663.46	2972.55	327.944	430.496	-0.387487	7.14258	37.4772	3.75083e-05	0.000139514
GL4_0188	CDS	189340	191334	2.8.3.8	acetyl-CoA:acetoacetyl-CoA transferase, alpha subunit	F1CYZ5	carA	1995	9794	11121	719	955	383.509	386.122	177.173	174.491	384.815	175.832	192.235	193.545	88.8084	87.4644	192.89	88.1364	-1.12115	10452.8	836.626	9879.6	11026.1	723.502	949.751	-1.13709	8.77579	373.795	6.44875e-11	1.35592e-09
GL4_0189	CDS	191484	192449	3.4.16.4	D-alanyl-D-alanine carboxypeptidase	P44466	dacA,HI_0029	966	2290	2561	232	336	89.6708	88.9181	57.1684	61.3918	89.2944	59.2801	92.8269	92.0477	59.1806	63.5525	92.4373	61.3666	-0.583226	2425.41	283.691	2292.4	2558.42	245.331	322.05	-0.58973	6.88206	73.4704	1.09073e-06	6.44948e-06
GL4_0190	CDS	192605	193219	.	hypothetical protein	NA	NA	615	4472	5012	703	918	175.113	174.017	173.23	167.731	174.565	170.481	284.736	282.954	281.675	272.733	283.845	277.204	-0.0340334	4741.53	810.641	4481.51	5001.56	701.03	920.252	-0.0421696	7.99366	0.577464	0.460952	0.534114
GL4_0191	CDS	193226	195097	.	glucans biosynthesis glucosyltransferase H	Q9KSG9	opgH,VC_1287	1872	2209	2549	329	392	86.499	88.5014	81.0707	71.6237	87.5002	76.3472	46.2068	47.2764	43.307	38.2605	46.7416	40.7838	-0.192303	2377.63	360.986	2247.23	2508.02	312.175	409.796	-0.21344	6.95035	10.094	0.00733238	0.0143416
GL4_0192	CDS	195101	196600	.	glucans biosynthesis protein G precursor	C3LLY3	opgG,VCM66_1243	1500	1578	1762	220	319	61.7906	61.1768	54.2114	58.2856	61.4837	56.2485	41.1937	40.7845	36.141	38.8571	40.9891	37.499	-0.125194	1669.99	269.22	1578.4	1761.57	232.817	305.622	-0.126917	6.46991	2.99955	0.10708	0.151431
GL4_0193	CDS	196885	197145	.	hypothetical protein	NA	NA	261	503	609	78	100	19.6963	21.1445	19.2204	18.2714	20.4204	18.7459	75.4646	81.0135	73.6415	70.0052	78.239	71.8233	-0.12181	555.34	89.0218	524.884	585.795	76.9847	101.059	-0.135039	4.89589	1.12668	0.307927	0.379241
GL4_0194	CDS	197300	198106	.	Bll0856 protein	NA	NA	807	702	695	100	140	27.4886	24.1304	24.6416	25.5799	25.8095	25.1107	34.0627	29.9014	30.5348	31.6975	31.9821	31.1161	-0.0383828	699.609	119.929	661.242	737.976	103.713	136.146	-0.0383068	5.24617	0.106238	0.749688	0.794813
GL4_0195	CDS	198066	198551	.	hypothetical protein	Q6C2X0	PKAR,YALI0F04422g	486	1542	1724	185	257	60.3809	59.8574	45.5869	46.9574	60.1192	46.2721	124.241	123.163	93.8002	96.6201	123.702	95.2102	-0.374223	1632.96	220.888	1543.41	1722.51	191.021	250.755	-0.379997	6.37513	25.7051	0.000218986	0.000673962
GL4_0196	CDS	198617	200986	.	hypothetical protein	P28249	asmA,yegA,b2064,JW2049	2370	9749	10995	1983	2466	381.747	381.747	488.642	450.572	381.747	469.607	161.075	161.075	206.178	190.115	161.075	198.146	0.29717	10369.2	2230.98	9800.52	10937.8	1929.31	2532.64	0.289487	9.27162	24.9628	0.000249242	0.000756359
GL4_0197	CDS	201215	201958	5.4.2.1	phosphoglycerate mutase	Q8R7C8	gpmA,TTE2487	744	1597	1698	300	371	62.5346	58.9547	73.9247	67.7867	60.7446	70.8557	84.0519	79.2401	99.3611	91.1112	81.646	95.2362	0.219634	1648.67	335.752	1558.25	1739.08	290.353	381.151	0.210191	6.55305	8.99011	0.0103334	0.0195344
GL4_0198	CDS	201982	202323	.	hypothetical protein	NA	NA	342	620	663	87	154	24.2777	23.0194	21.4382	28.1379	23.6485	24.788	70.9874	67.3082	62.6847	82.2745	69.1478	72.4796	0.0669462	641.868	120.145	606.668	677.068	103.899	136.39	0.0885125	5.15142	0.479122	0.501074	0.573024
GL4_0199	CDS	202369	203067	.	hypothetical protein	NA	NA	699	3632	4048	614	850	142.22	140.547	151.299	155.307	141.384	153.303	203.462	201.068	216.451	222.184	202.265	219.317	0.116219	3840.11	730.878	3629.52	4050.71	632.052	829.704	0.112595	7.74771	3.99034	0.0672682	0.100963
GL4_0200	CDS	203545	204303	2.4.1.187	N-acetylmannosaminyltransferase	Q8RKI7	tarA,BSUW23_17555	759	1038	1155	150	232	40.6455	40.1017	36.9623	42.3895	40.3736	39.6759	53.5514	52.8349	48.6987	55.8492	53.1932	52.274	-0.0246799	1096.54	190.725	1036.41	1156.68	164.936	216.514	-0.0173443	5.89582	0.036701	0.851053	0.879043
GL4_0201	CDS	204372	205565	.	xanthan biosynthesis glycosyltransferase GumH	Q44571	aceC,aceA	1194	929	1006	117	205	36.3774	34.9284	28.8306	37.4563	35.6529	33.1435	30.4668	29.2533	24.1463	31.3704	29.86	27.7583	-0.101759	967.87	160.623	914.791	1020.95	138.904	182.342	-0.0850684	5.70013	0.596491	0.453819	0.527685
GL4_0202	CDS	205537	206922	.	xanthan biosynthesis exopolysaccharide polymerase GumE	NA	NA	1386	1245	1439	190	279	48.7512	49.9622	46.819	50.9771	49.3567	48.898	35.174	36.0477	33.7799	36.78	35.6109	35.28	-0.0130991	1341.36	234.246	1267.8	1414.92	202.572	265.919	-0.0115566	6.18689	0.0204894	0.888387	0.909106
GL4_0203	CDS	207009	207830	.	hypothetical protein	NA	NA	822	1369	1560	203	265	53.6067	54.1633	50.0224	48.4191	53.885	49.2207	65.215	65.8921	60.8545	58.904	65.5535	59.8792	-0.128565	1464.07	234.012	1383.78	1544.36	202.37	265.655	-0.139261	6.27888	3.47683	0.0851101	0.12378
GL4_0204	CDS	207844	208959	.	hypothetical protein	P17974	egl	1116	734	820	121	157	28.7416	28.4705	29.8163	28.686	28.606	29.2512	25.7542	25.5112	26.7171	25.7043	25.6327	26.2107	0.0309784	776.99	139.015	734.379	819.601	120.218	157.812	0.0233829	5.41093	0.0569445	0.815136	0.849855
GL4_0205	CDS	208968	210089	.	hypothetical protein	Q48454		1122	2181	2379	306	315	85.4026	82.599	75.4032	57.5548	84.0008	66.479	76.1164	73.6177	67.2043	51.2966	74.867	59.2504	-0.332502	2280.88	311.414	2155.8	2405.97	269.306	353.521	-0.366601	6.85102	18.6295	0.000849657	0.00223598
GL4_0206	CDS	210311	211921	.	hypothetical protein	NA	NA	1611	5000	5648	665	844	195.788	196.099	163.866	154.21	195.943	159.038	121.532	121.725	101.717	95.7233	121.628	98.7202	-0.298335	5322.47	755.33	5030.58	5614.36	653.198	857.462	-0.310856	8.0647	29.659	0.000114509	0.000381582
GL4_0207	CDS	211958	213115	.	glycosyltransferase	Q0P9C6	pglI,Cj1128c	1158	3820	4562	579	727	149.582	158.393	142.675	132.833	153.987	137.754	129.173	136.781	123.208	114.709	132.977	118.958	-0.159453	4184.67	653.797	3955.18	4414.16	565.393	742.2	-0.172143	7.76862	7.83815	0.0151155	0.0271996
GL4_0208	CDS	213284	213937	.	hypothetical protein	Q81ST8	bshB1,bshB,BA_1557,BAS1444,GBAA_1557,BF27_424,TM00_07895	654	2302	2635	293	421	90.1407	91.4874	72.1998	76.9224	90.814	74.5611	137.83	139.889	110.397	117.618	138.859	114.008	-0.282245	2467.4	356.558	2332.09	2602.71	308.346	404.77	-0.284708	6.98234	18.6107	0.000853081	0.00224144
GL4_0209	CDS	213942	214742	2.7.7.33	glucose-1-phosphate cytidylyltransferase	Q8Z5I4	rfbF,STY2302,t0780	801	5500	6330	698	903	215.367	219.778	171.998	164.99	217.572	168.494	268.872	274.38	214.729	205.98	271.626	210.355	-0.367255	5910.58	800.903	5586.44	6234.72	692.609	909.197	-0.377538	8.19139	43.0287	1.88308e-05	7.58012e-05
GL4_0210	CDS	215098	215703	5.1.3.13	dTDP-4-dehydrorhamnose 3,5-epimerase	P55468	NGR_a03520,y4gL	606	749	855	175	215	29.329	29.6857	43.1227	39.2834	29.5073	41.2031	48.3977	48.9862	71.1596	64.8241	48.692	67.9919	0.473414	801.782	195.139	757.811	845.752	168.753	221.525	0.467235	5.57823	27.1435	0.000171651	0.000539589
GL4_0211	CDS	215731	217062	.	methyltransferase, putative	Q9L9E7	novU	1332	3405	3959	578	785	133.331	137.457	142.428	143.43	135.394	142.929	100.099	103.196	106.928	107.68	101.647	107.304	0.0773945	3678.75	680.871	3477	3880.49	588.807	772.935	0.0722801	7.67011	1.57646	0.231507	0.29585
GL4_0212	CDS	217098	218426	.	hypothetical protein	Q97H19	CA_C2195	1329	1968	2248	297	382	77.0621	78.0507	73.1854	69.7966	77.5564	71.491	57.985	58.7289	55.0681	52.5181	58.3569	53.7931	-0.115423	2107.21	339.588	1991.64	2222.77	293.67	385.505	-0.127413	6.80251	3.91773	0.0694964	0.103886
GL4_0213	CDS	218524	219570	5.1.3.2	UDP-glucose 4-epimerase	Q6K2E1	UGE-4,Os09g0323000,LOC_Os09g15420,OsJ_28859,OSJNBb0024J13.13-1	1047	2605	2844	396	487	102.005	98.7439	97.5806	88.9815	100.375	93.281	97.4264	94.3112	93.2002	84.9871	95.8688	89.0936	-0.104607	2725.61	441.989	2576.14	2875.09	382.226	501.753	-0.11844	7.17359	3.74962	0.0750052	0.110876
GL4_0214	CDS	219781	221898	.	succinoglycan biosynthesis transport protein exop	P33698	exoP,RB1086,SMb20961	2118	9011	10130	1155	1437	352.849	351.714	284.61	262.559	352.281	273.585	166.595	166.06	134.377	123.966	166.327	129.171	-0.362263	9568.71	1299.17	9043.96	10093.5	1123.5	1474.84	-0.374679	8.87533	41.5967	2.2338e-05	8.80036e-05
GL4_0215	CDS	221944	223410	2.7.8.6	undecaprenyl-phosphate galactosephosphotransferase	P71241	wcaJ,b2047,JW2032	1467	2622	2828	260	428	102.671	98.1883	64.0681	78.2014	100.43	71.1347	69.9871	66.9314	43.6728	53.307	68.4593	48.4899	-0.489032	2726.71	342.959	2577.18	2876.25	296.586	389.332	-0.484963	7.07033	36.0312	4.54621e-05	0.000165222
GL4_0216	CDS	223842	224513	.	polysaccharide export protein	Q02728	exoF,RB1068,SMb20945	672	1702	1738	125	150	66.6462	60.3435	30.802	27.407	63.4948	29.1045	99.1758	89.7968	45.8362	40.7843	94.4863	43.3103	-1.10765	1722.31	137.574	1627.86	1816.77	118.972	156.176	-1.13981	6.31066	141.146	2.5183e-08	2.42998e-07
GL4_0217	CDS	224634	225980	5.4.3.8	glutamate-1-semialdehyde aminotransferase	A4J6H0	hemL,Dred_2156	1347	2638	2865	351	448	103.298	99.473	86.4919	81.8557	101.385	84.1738	76.6872	73.8478	64.2108	60.7689	75.2675	62.4898	-0.264543	2752.89	399.675	2601.92	2903.86	345.633	453.717	-0.277978	7.14007	20.6604	0.000558464	0.00154927
GL4_0218	CDS	225999	226448	.	Kef-type K+ transport systems, predicted NAD-binding component	NA	NA	450	1064	1247	131	165	41.6636	43.2959	32.2804	30.1477	42.4798	31.2141	92.5859	96.2132	71.7343	66.995	94.3995	69.3646	-0.439131	1154.75	148.044	1091.42	1218.08	128.026	168.062	-0.457336	5.87054	25.1063	0.000243034	0.000739542
GL4_0219	CDS	226452	229646	.	RND efflux system, inner membrane transporter CmeB	Q8FWV9	bepG,BRA0334,BS1330_II0331	3195	11925	13699	1624	1972	466.954	475.63	400.179	360.311	471.292	380.245	146.151	148.867	125.252	112.773	147.509	119.013	-0.307367	12802.3	1805.21	12100.2	13504.4	1561.12	2049.3	-0.32011	9.30987	27.4948	0.000161963	0.000514479
GL4_0220	CDS	229650	231110	.	RND efflux system, membrane fusion protein CmeA	Q8FWV8	bepF,BRA0335,BS1330_II0332	1461	9944	11372	1609	1897	389.383	394.837	396.483	346.608	392.11	371.545	266.518	270.251	271.378	237.24	268.384	254.309	-0.0774231	10651.2	1762.57	10067.1	11235.4	1524.24	2000.89	-0.0892238	9.13845	1.97288	0.183729	0.241752
GL4_0221	CDS	231367	231780	.	hypothetical protein	NA	NA	414	3582	4155	180	237	140.262	144.262	44.3548	43.3031	142.262	43.829	338.798	348.459	107.137	104.597	343.628	105.867	-1.68922	3865.38	208.494	3653.4	4077.36	180.302	236.685	-1.70631	7.32511	591.731	3.5756e-12	1.18294e-10
GL4_0222	CDS	231810	234287	.	hypothetical protein	Q24UI6	infB,DSY2517	2478	88436	98492	738	940	3462.94	3419.65	181.855	171.751	3441.29	176.803	1397.47	1380	73.3877	69.3102	1388.74	71.349	-4.2637	93469.3	840.075	88343.4	98595.3	726.484	953.666	-4.29172	11.4232	3767.62	2.55958e-17	2.13021e-14
GL4_0223	CDS	234308	235432	.	DegT/DnrJ/EryC1/StrS family protein	Q9HZ76	wbpE,PA3155	1125	3400	3835	424	658	133.136	133.151	104.48	120.226	133.144	112.353	118.343	118.357	92.8713	106.867	118.35	99.8692	-0.242711	3616.69	538.988	3418.35	3815.03	466.109	611.867	-0.240282	7.53798	11.9993	0.00423003	0.00883978
GL4_0224	CDS	235583	236590	.	hypothetical protein	P94409	yclG,BSU03680	1008	20069	22767	1226	1583	785.853	790.472	302.106	289.236	788.162	295.671	779.616	784.198	299.708	286.94	781.907	293.324	-1.41144	21408.6	1405.64	20234.6	22582.7	1215.57	1595.7	-1.42283	9.70315	562.508	4.92626e-12	1.55931e-10
GL4_0225	CDS	236609	237736	1.2.1.19	aminobutyraldehyde dehydrogenase	Q9LES4	L2HGDH,At3g56840,T8M16_170	1128	6402	6792	291	384	250.687	235.819	71.707	70.162	243.253	70.9345	222.24	209.059	63.57	62.2004	215.65	62.8852	-1.76181	6605.17	337.465	6242.94	6967.4	291.835	383.096	-1.78462	8.03114	719.128	1.03826e-12	4.1643e-11
GL4_0226	CDS	237880	239445	.	hypothetical protein	Q148F3	ARSK	1566	2330	2539	264	396	91.2371	88.1542	65.0537	72.3546	89.6957	68.7041	58.2612	56.2926	41.5413	46.2034	57.2769	43.8724	-0.377097	2435.52	329.442	2301.95	2569.08	284.897	373.988	-0.380046	6.93856	29.1105	0.000124805	0.000411361
GL4_0227	CDS	239610	239951	.	cytochrome c552	P24059	cycB,blr6128	342	879	945	133	161	34.4195	32.8105	32.7733	29.4169	33.615	31.0951	100.642	95.937	95.8283	86.0143	98.2894	90.9213	-0.111241	912.437	147.099	862.398	962.475	127.209	166.989	-0.126862	5.60662	1.75016	0.208798	0.270252
GL4_0228	CDS	240038	240985	.	phosphoesterase	O35040	ykoQ,BSU13370	948	1121	1207	191	261	43.8956	41.9071	47.0654	47.6882	42.9014	47.3768	46.3034	44.2058	49.647	50.304	45.2546	49.9755	0.140208	1164.54	225.911	1100.68	1228.41	195.364	256.457	0.140085	6.02563	3.06881	0.103496	0.146924
GL4_0229	CDS	240979	241467	.	hypothetical protein	Q975E2	carS,STK_04650	489	650	650	95	120	25.4524	22.568	23.4095	21.9256	24.0102	22.6676	52.0499	46.1514	47.8722	44.8377	49.1007	46.3549	-0.0813155	650.978	107.539	615.278	686.678	92.9982	122.08	-0.0916704	5.13135	0.579871	0.460039	0.533242
GL4_0230	CDS	241584	242804	.	hypothetical protein	A0QRI8	menJ,MSMEG_1132,MSMEI_1100	1221	1314	1503	242	346	51.453	52.1843	59.6326	63.2189	51.8186	61.4257	42.1401	42.7389	48.8391	51.7763	42.4395	50.3077	0.240168	1408.03	293.713	1330.81	1485.24	253.998	333.427	0.244817	6.33329	11.0807	0.00548086	0.0110692
GL4_0231	CDS	242918	244255	1.1.1.22	UDP-glucose dehydrogenase	O54068	rkpK,R01082,SMc02641	1338	4305	4731	841	1043	168.573	164.261	207.236	190.57	166.417	198.903	125.989	122.766	154.885	142.429	124.377	148.657	0.255381	4519.62	943.94	4271.76	4767.48	816.305	1071.57	0.246601	8.03978	18.7627	0.00082587	0.00217682
GL4_0232	CDS	244531	245538	4.2.1.46	dTDP-glucose 4,6-dehydratase	P39858	capI	1008	1528	1767	307	454	59.8327	61.3504	75.6496	82.9519	60.5915	79.3008	59.3579	60.8634	75.0492	82.2936	60.1107	78.6714	0.382638	1646.65	379.881	1556.35	1736.95	328.516	431.247	0.390089	6.61288	30.1186	0.000106632	0.00035784
GL4_0233	CDS	245599	246423	.	hypothetical protein	NA	NA	825	1001	1081	158	270	39.1967	37.5324	38.9337	49.3327	38.3646	44.1332	47.5112	45.4938	47.1923	59.7972	46.5025	53.4947	0.198114	1041.43	213.458	984.317	1098.54	184.595	242.321	0.219463	5.88588	4.65386	0.0504103	0.0785288
GL4_0234	CDS	246829	247599	.	hypothetical protein	Q9C9Q6	RRA1,At1g75120,F9E10.3	771	2091	2321	280	441	81.8784	80.5853	68.9964	80.5767	81.2319	74.7865	106.198	104.52	89.4895	104.509	105.359	96.9994	-0.118099	2206.2	359.625	2085.21	2327.19	310.998	408.252	-0.11094	6.87229	2.19423	0.162504	0.217466
GL4_0235	CDS	247745	248938	.	sulfolipid (UDP-sulfoquinovose) biosynthesis protein	Q84KI6	SQD1	1194	2347	2854	389	505	91.9028	99.0911	95.8557	92.2703	95.4969	94.063	76.9705	82.9908	80.2811	77.2783	79.9807	78.7797	-0.0215551	2596.45	447.084	2454.06	2738.84	386.632	507.537	-0.0318741	7.13092	0.224743	0.643362	0.701669
GL4_0236	CDS	249242	250177	.	hypothetical protein	NA	NA	936	2520	2879	463	614	98.677	99.9591	114.09	112.186	99.3181	113.138	105.424	106.794	121.891	119.857	106.109	120.874	0.186313	2698.32	538.391	2550.34	2846.3	465.592	611.189	0.180697	7.26045	10.0174	0.00750432	0.014635
GL4_0237	CDS	250270	254433	.	hypothetical protein	NA	NA	4164	28131	31790	4178	5398	1101.54	1103.75	1029.52	986.288	1102.65	1007.91	264.539	265.07	247.244	236.861	264.805	242.052	-0.129098	29950.4	4792.66	28307.9	31592.9	4144.62	5440.7	-0.13763	10.6044	5.68501	0.0331494	0.0543099
GL4_0238	CDS	255089	255751	.	inner membrane protein translocase component YidC, long form	B5RLZ9	yidC,BDU_440	663	1934	2067	288	354	75.7307	71.7664	70.9677	64.6806	73.7485	67.8241	114.224	108.245	107.04	97.5575	111.235	102.299	-0.119693	2001.87	321.252	1892.08	2111.65	277.814	364.69	-0.133505	6.72793	3.77191	0.0742454	0.109948
GL4_0239	CDS	255751	257202	.	nodulation protein noeA	Q52892	noeA,RA0416,SMa0773	1452	6696	7888	1108	1477	262.199	273.872	273.029	269.868	268.035	271.448	180.578	188.617	188.036	185.859	184.597	186.948	0.0181556	7282.11	1291.62	6882.76	7681.47	1116.97	1466.26	0.0108696	8.63268	0.0350156	0.85447	0.881995
GL4_0240	CDS	257211	257393	.	hypothetical protein	NA	NA	183	1575	2058	288	343	61.6731	71.4539	70.9677	62.6707	66.5635	66.8192	337.012	390.458	387.802	342.463	363.735	365.132	0.00551639	1812.18	315.866	1712.8	1911.56	273.156	358.576	-0.0142949	6.61897	0.0228063	0.882295	0.903741
GL4_0241	CDS	258209	259924	.	hypothetical protein	NA	NA	1716	2889	3305	507	756	113.126	114.75	124.933	138.131	113.938	131.532	65.9243	66.8705	72.8046	80.4962	66.3974	76.6504	0.2043	3095.45	629.561	2925.7	3265.21	544.435	714.687	0.208302	7.47083	10.5506	0.00639748	0.0126618
GL4_0242	CDS	260114	260608	.	hypothetical protein	NA	NA	495	1192	1375	214	283	46.6758	47.7401	52.7329	51.7079	47.2079	52.2204	94.2946	96.4446	106.531	104.46	95.3696	105.496	0.144147	1282.94	248.481	1212.58	1353.29	214.883	282.079	0.137784	6.16512	3.2965	0.0927004	0.13342
GL4_0243	CDS	261016	261780	1.1.1.46	predicted L-arabinose 1-dehydrogenase	P0DOV5	PpSQ1_00405	765	1988	2168	343	444	77.8452	75.2731	84.5206	81.1248	76.5592	82.8227	101.758	98.3962	110.484	106.046	100.077	108.265	0.112371	2078.78	393.58	1964.78	2192.78	340.362	446.798	0.105026	6.85508	2.84977	0.115366	0.160893
GL4_0244	CDS	261781	262755	1.1.1.95	D-3-phosphoglycerate dehydrogenase	Q9X1C1	TM_1401,THEMA_07310,Tmari_1408	975	2899	3252	530	642	113.518	112.91	130.6	117.302	113.214	123.951	116.428	115.805	133.949	120.31	116.117	127.129	0.129656	3075.18	587.082	2906.54	3243.83	507.7	666.465	0.117001	7.4274	3.89107	0.0703366	0.104906
GL4_0245	CDS	262759	263442	2.7.7.38	3-deoxy-manno-octulosonate cytidylyltransferase	Q45982	ptmB	684	2063	2511	445	473	80.782	87.1821	109.655	86.4235	83.9821	98.0392	118.102	127.459	160.314	126.35	122.781	143.332	0.221606	2283.6	460.661	2158.36	2408.83	398.373	522.949	0.1965	7.02358	5.44374	0.0364608	0.058825
GL4_0246	CDS	263439	264476	.	hypothetical protein	P26403	rfbN,STM2085	1038	5236	5643	1037	1246	205.029	195.925	255.533	227.661	200.477	241.597	197.523	188.753	246.178	219.327	193.138	232.752	0.2679	5444.1	1145.68	5145.55	5742.66	990.769	1300.6	0.257551	8.31641	17.9935	0.000974753	0.00251376
GL4_0247	CDS	264711	265604	3.1.1.68	xylonolactonase	Q9I923	RGN	894	1376	1448	227	301	53.8808	50.2747	55.9363	54.9968	52.0777	55.4666	60.2693	56.2356	62.5686	61.5176	58.2525	62.0431	0.0894636	1413.15	263.972	1335.65	1490.64	228.279	299.665	0.0855804	6.2902	1.26294	0.281546	0.351037
GL4_0248	CDS	265741	266880	.	hypothetical protein	NA	NA	1140	2461	2788	417	531	96.3667	96.7995	102.755	97.0209	96.5831	99.8881	84.5322	84.9119	90.1362	85.106	84.7221	87.6211	0.0479846	2623.78	474.257	2479.89	2767.67	410.131	538.384	0.0381389	7.16951	0.423073	0.526807	0.596533
GL4_0249	CDS	266922	267734	.	ABC transporter, ATP-binding subunit	Q56903	rfbE	813	4412	4775	731	912	172.763	165.788	180.13	166.635	169.276	173.382	212.501	203.922	221.562	204.963	208.211	213.262	0.0344182	4596.78	822.893	4344.69	4848.87	711.625	934.161	0.0242004	7.97412	0.17621	0.681548	0.734501
GL4_0250	CDS	267739	268497	.	O-antigen export system permease protein RfbD	Q56902	rfbD	759	5942	6500	1035	1392	232.674	225.68	255.04	254.337	229.177	254.689	306.554	297.339	336.021	335.095	301.946	335.558	0.151794	6224.08	1212.24	5882.74	6565.41	1048.33	1376.16	0.145862	8.46253	6.79896	0.0217871	0.0372326
GL4_0251	CDS	268685	269785	.	hypothetical protein	O23461	ARA1,ISA1,At4g16130,dl4105w,FCAALL.288	1101	827	803	123	190	32.3833	27.8802	30.3091	34.7156	30.1318	32.5123	29.4126	25.3226	27.5287	31.5309	27.3676	29.5298	0.105974	816.436	156.265	771.662	861.209	135.135	177.394	0.120668	5.50649	1.08036	0.317682	0.389526
GL4_0252	CDS	269944	271959	.	O-antigen acetylase	Q7A1B1	MW0856	2016	2228	2388	400	613	87.243	82.9115	98.5663	112.003	85.0773	105.285	43.2753	41.1267	48.892	55.5572	42.201	52.2246	0.301028	2309.62	505.078	2182.96	2436.29	436.784	573.372	0.31294	7.08234	19.889	0.000652842	0.00177269
GL4_0253	CDS	272164	273240	.	hypothetical protein	NA	NA	1077	1612	1798	258	346	63.122	62.4267	63.5752	63.2189	62.7743	63.3971	58.6091	57.9635	59.0299	58.6991	58.2863	58.8645	0.0140023	1705.01	301.926	1611.51	1798.52	261.101	342.751	0.00852748	6.53824	0.0158916	0.901624	0.919579
GL4_0254	CDS	273278	274201	5.1.3.2	UDP-glucose 4-epimerase	Q57664	MJ0211	924	906	1032	145	220	35.4767	35.8311	35.7303	40.197	35.6539	37.9636	38.3947	38.7783	38.6691	43.5032	38.5865	41.0862	0.0883378	968.754	182.264	915.627	1021.88	157.619	206.909	0.0959265	5.74674	1.08039	0.317675	0.389526
GL4_0255	CDS	274224	275486	2.4.1.21	glycosyl transferase, group 1	Q8S4F6	SQD2,At5g01220,F7J8.200	1263	1187	1268	174	322	46.48	44.025	42.8763	58.8338	45.2525	50.855	36.8013	34.8575	33.948	46.5826	35.8294	40.2653	0.16407	1228.21	247.143	1160.85	1295.56	213.725	280.56	0.19288	6.11775	3.08635	0.102612	0.145856
GL4_0256	CDS	275576	277363	.	hemolytic protein hlpA	NA	NA	1788	2633	2876	459	614	103.102	99.8549	113.105	112.186	101.478	112.645	57.6632	55.8473	63.2577	62.7439	56.7552	63.0008	0.148138	2755.62	536.297	2604.5	2906.74	463.782	608.813	0.144765	7.27793	6.40811	0.025155	0.0423576
GL4_0257	CDS	277377	278798	.	hypothetical protein	NA	NA	1422	1849	2131	340	469	72.4023	73.9885	83.7813	85.6927	73.1954	84.737	50.9158	52.0313	58.9179	60.2621	51.4735	59.59	0.207489	1988.98	404.207	1879.91	2098.06	349.552	458.862	0.207163	6.82499	10.598	0.00630849	0.0125229
GL4_0258	CDS	278841	280271	2.7.7.22	mannose-1-phosphate guanylyltransferase	B0RVK6	xanB,xcc-b100_3730	1431	4166	4717	817	1027	163.13	163.775	201.322	187.647	163.452	194.484	113.997	114.448	140.686	131.13	114.223	135.908	0.248783	4440.02	923.422	4196.53	4683.51	798.562	1048.28	0.240533	8.01121	18.3926	0.00089394	0.00233041
GL4_0259	CDS	280463	281461	1.1.1.271	GDP-L-fucose synthetase	P55353	fcl,NGR_a00420,y4aF	999	3170	3661	655	800	124.129	127.11	161.402	146.171	125.62	153.787	124.254	127.237	161.564	146.317	125.746	153.94	0.289779	3413.03	728.982	3225.86	3600.2	630.413	827.551	0.278934	7.64248	22.5529	0.000386704	0.0011204
GL4_0260	CDS	281477	282553	4.2.1.47	GDP-mannose 4,6-dehydratase	P55354	gmd,noeL,NGR_a00410,y4aG	1077	4409	4828	787	1036	172.646	167.628	193.929	189.291	170.137	191.61	160.302	155.644	180.064	175.758	157.973	177.911	0.170459	4620.55	911.41	4367.15	4873.94	788.173	1034.65	0.164147	8.03724	8.80607	0.0109631	0.0205729
GL4_0261	CDS	282701	283582	.	glycosyltransferase	Q4UM29	RF_0543	882	941	1083	120	184	36.8473	37.6018	29.5699	33.6193	37.2245	31.5946	41.7769	42.6325	33.5259	38.1171	42.2047	35.8215	-0.230639	1011.6	151.819	956.125	1067.08	131.291	172.347	-0.230117	5.73018	5.64918	0.0336179	0.0549405
GL4_0262	CDS	283585	284508	.	glycosyl transferase, family 2	P9WMX9	Rv1514c,MTCY277.36c	924	1092	1205	137	203	42.7601	41.8377	33.7589	37.0908	42.2989	35.4249	46.2771	45.2789	36.5357	40.1416	45.778	38.3386	-0.249883	1148.67	169.837	1085.68	1211.66	146.872	192.801	-0.251648	5.90618	8.00576	0.0142797	0.0258916
GL4_0263	CDS	284540	285316	.	hypothetical protein	NA	NA	777	1087	1141	161	227	42.5643	39.6156	39.6729	41.476	41.0899	40.5744	54.7803	50.9853	51.0591	53.3796	52.8828	52.2194	-0.0178732	1114.88	193.877	1053.74	1176.02	167.662	220.092	-0.0176318	5.91998	0.0404437	0.843747	0.872851
GL4_0264	CDS	285410	285571	.	hypothetical protein	NA	NA	162	180	187	18	45	7.04836	6.49265	4.43548	8.22211	6.77051	6.3288	43.5084	40.0781	27.3795	50.7538	41.7932	39.0666	-0.0949816	183.644	31.3716	173.573	193.716	27.1297	35.6135	-0.0432933	3.33738	0.0335879	0.857431	0.883712
GL4_0265	CDS	285568	287493	6.3.5.4	asparagine synthetase [glutamine-hydrolyzing]	P54420	asnB,asn,BSU30540	1926	2750	2930	513	660	107.683	101.73	126.411	120.591	104.707	123.501	55.9103	52.8192	65.6341	62.6121	54.3648	64.1231	0.234201	2842.55	586.762	2686.67	2998.44	507.423	666.101	0.229692	7.35523	15.4441	0.00174575	0.00409269
GL4_0266	CDS	287704	288951	.	possible polysaccharide pyruvyl transferase	NA	NA	1248	1313	1398	191	302	51.4139	48.5386	47.0654	55.1795	49.9763	51.1224	41.197	38.8931	37.7126	44.2143	40.0451	40.9635	0.0319255	1356.37	246.044	1281.98	1430.75	212.775	279.312	0.0432767	6.21828	0.245239	0.628764	0.688085
GL4_0267	CDS	289119	290996	.	hypothetical protein	P54736	pkn2	1878	1871	2043	390	458	73.2638	70.9331	96.1021	83.6828	72.0984	89.8925	39.0116	37.7705	51.1726	44.5595	38.3911	47.8661	0.310964	1957.68	424.726	1850.32	2065.04	367.296	482.155	0.301478	6.83621	20.3301	0.000596795	0.00163922
GL4_0268	CDS	291228	291383	.	hypothetical protein	NA	NA	156	320	307	66	63	12.5304	10.6591	16.2634	11.511	11.5947	13.8872	80.3232	68.3273	104.253	73.7882	74.3252	89.0205	0.25712	314.134	64.7273	296.907	331.362	55.9752	73.4794	0.226969	4.15258	1.65813	0.220447	0.283566
GL4_0269	CDS	291398	292735	.	polysaccharide biosynthesis related protein	NA	NA	1338	1245	1436	241	294	48.7512	49.858	59.3862	53.7178	49.3046	56.552	36.4358	37.2631	44.3843	40.1478	36.8495	42.2661	0.192963	1339.91	267.713	1266.42	1413.39	231.514	303.912	0.182646	6.2419	5.81778	0.031479	0.0519551
GL4_0270	CDS	292807	293760	2.3.2.6	leucyl/phenylalanyl-tRNA--protein transferase	B0TQ11	aat,Shal_1724	954	1369	1490	185	273	53.6067	51.7329	45.5869	49.8808	52.6698	47.7338	56.1915	54.2274	47.785	52.286	55.2094	50.0355	-0.139312	1430	228.749	1351.58	1508.42	197.819	259.68	-0.138107	6.24541	2.97985	0.108127	0.152681
GL4_0271	CDS	293977	295020	.	oxidoreductase, aldo/keto reductase family	P0A9T5	tas,SF2844,S3042	1044	3379	3742	797	958	132.313	129.922	196.393	175.04	131.118	185.716	126.737	124.447	188.116	167.662	125.592	177.889	0.498882	3561.1	880.035	3365.81	3756.39	761.041	999.029	0.489332	7.79725	69.8589	1.44188e-06	8.09684e-06
GL4_0272	CDS	295105	295662	.	2'-5' RNA ligase	O34570	ytlP,BSU29960	558	1028	1195	233	270	40.254	41.4905	57.4148	49.3327	40.8722	53.3738	72.1397	74.3557	102.894	88.4098	73.2477	95.6519	0.380451	1110.93	251.842	1050	1171.85	217.789	285.895	0.364811	6.02534	19.104	0.000768362	0.00204303
GL4_0273	CDS	295659	296183	3.1.3.48	low molecular weight protein tyrosine phosphatase	Q55535	slr0328	525	1090	1069	184	209	42.6817	37.1157	45.3405	38.1871	39.8987	41.7638	81.2985	70.6967	86.3628	72.7374	75.9976	79.5501	0.0650729	1081.29	196.762	1021.99	1140.58	170.157	223.367	0.0478127	5.89369	0.210771	0.653793	0.709876
GL4_0274	CDS	296281	296691	.	hypothetical protein	O31670	ykvA,BSU13630	411	2217	2292	119	177	86.8123	79.5784	29.3235	32.3403	83.1953	30.8319	211.222	193.621	71.3466	78.6869	202.422	75.0167	-1.42008	2257.37	147.888	2133.58	2381.17	127.891	167.885	-1.42579	6.63882	250.848	7.68812e-10	1.1477e-08
GL4_0275	CDS	296713	297693	.	putative Zn-dependent oxidoreductase PA5234	B0BNC9		981	1827	1949	264	314	71.5409	67.6694	65.0537	57.3721	69.6051	61.2129	72.9265	68.98	66.3137	58.4832	70.9532	62.3985	-0.182612	1889.32	289.316	1785.71	1992.93	250.196	328.436	-0.201078	6.62688	7.54491	0.0167195	0.0296691
GL4_0276	CDS	297821	298369	.	putative RNA methyltransferase, TrmH family	NA	NA	549	1621	1799	378	528	63.4744	62.4614	93.1451	96.4728	62.9679	94.8089	115.618	113.773	169.663	175.725	114.696	172.694	0.586213	1710.14	452.562	1616.36	1803.93	391.369	513.755	0.588058	6.74675	88.6512	3.79145e-07	2.54985e-06
GL4_0277	CDS	298472	298954	.	Mlr4354 like protein	NA	NA	483	3059	3509	760	937	119.783	121.833	187.276	171.203	120.808	179.239	247.998	252.242	387.735	354.457	250.12	371.096	0.567298	3282.1	850.166	3102.1	3462.09	735.211	965.121	0.557216	7.70764	95.9656	2.40954e-07	1.73681e-06
GL4_0278	CDS	299095	300291	.	ribosomal RNA large subunit methyltransferase N	Q11EE0	rlmN,Meso_2859	1197	2296	2606	304	423	89.9057	90.4805	74.9104	77.2878	90.1931	76.0991	75.1092	75.5894	62.5817	64.5679	75.3493	63.5748	-0.241643	2450.27	363.205	2315.9	2584.65	314.094	412.316	-0.248017	6.9828	15.2666	0.00182183	0.00424712
GL4_0279	CDS	300288	300851	.	alkyl hydroperoxide reductase subunit C-like protein	P0AE55	bcp,SF2523,S2673	564	693	702	55	90	27.1362	24.3735	13.5529	16.4442	25.7548	14.9985	48.1138	43.2154	24.0299	29.1564	45.6646	26.5932	-0.758018	698.469	72.3938	660.164	736.773	62.605	82.1825	-0.763906	5.11423	30.7729	9.64722e-05	0.000327376
GL4_0280	CDS	300855	301448	.	2-hydroxychromene-2-carboxylate isomerase	Q9X9Q7	nsaD	594	2094	2391	180	264	81.9959	83.0157	44.3548	48.2364	82.5058	46.2956	138.04	139.757	74.6714	81.206	138.899	77.9387	-0.825577	2241.65	221.788	2118.72	2364.59	191.799	251.777	-0.831158	6.72256	124.643	5.2601e-08	4.60813e-07
GL4_0281	CDS	301533	302015	.	hypothetical protein	NA	NA	483	1955	2236	356	406	76.553	77.6341	87.724	74.1817	77.0935	80.9528	158.495	160.733	181.623	153.585	159.614	167.604	0.0700433	2094.66	381.761	1979.79	2209.54	330.141	433.381	0.0500667	6.8485	0.501035	0.49162	0.563957
GL4_0282	CDS	301981	302202	.	hypothetical protein	NA	NA	222	1771	2093	251	268	69.348	72.6691	61.8503	48.9672	71.0086	55.4088	312.379	327.338	278.605	220.573	319.858	249.589	-0.356613	1930.28	260.046	1824.42	2036.13	224.884	295.208	-0.385874	6.6103	20.0254	0.00063488	0.00173381
GL4_0283	CDS	302430	303254	.	hypothetical membrane protein	A0Q4N6	lpxF,FTN_0295,AW25_1746	825	1157	1288	203	295	45.3053	44.7194	50.0224	53.9005	45.0124	51.9614	54.9155	54.2054	60.6332	65.3339	54.5604	62.9836	0.203643	1222.54	248.737	1155.5	1289.59	215.104	282.37	0.208825	6.1162	7.01583	0.0201477	0.0347522
GL4_0284	CDS	303373	304584	6.3.4.5	argininosuccinate synthase	Q92L73	argG,R03209,SMc03826	1212	3309	3740	636	792	129.572	129.853	156.72	144.709	129.713	150.715	106.908	107.139	129.307	119.397	107.024	124.352	0.214639	3523.55	715.055	3330.31	3716.78	618.369	811.742	0.205133	7.65913	13.16	0.00309476	0.00672484
GL4_0285	CDS	304617	305681	1.3.1.9	enoyl-[acyl-carrier-protein] reductase [FMN]	Q49W60	SSP1854	1065	1644	1824	311	376	64.375	63.3294	76.6353	68.7003	63.8522	72.6678	60.446	59.4642	71.958	64.5073	59.9551	68.2327	0.183705	1734.15	343.861	1639.05	1829.25	297.366	390.356	0.171695	6.61393	6.40469	0.025187	0.0423901
GL4_0286	CDS	305718	306800	4.1.1.2	oxalate decarboxylase	O34767	oxdD,yoaN,BSU18670	1083	3019	3225	561	705	118.217	111.972	138.239	128.813	115.094	133.526	109.157	103.391	127.645	118.941	106.274	123.293	0.212446	3124.78	633.68	2953.41	3296.14	547.997	719.363	0.204106	7.4836	12.168	0.00403816	0.00847595
GL4_0287	CDS	307041	308870	.	GTP-binding protein TypA/BipA	P0A3B4	typA,bipA,SF3941,S3805	1830	9389	10239	1668	2168	367.65	355.499	411.021	396.123	361.575	403.572	200.902	194.262	224.602	216.461	197.582	220.531	0.157777	9819.87	1918.98	9281.35	10358.4	1659.51	2178.46	0.150679	9.12643	7.16339	0.0191149	0.0332463
GL4_0288	CDS	308989	309495	.	GCN5-related N-acetyltransferase	O32075	yuaI,BSU31000	507	1739	1838	321	417	68.095	63.8155	79.0994	76.1915	65.9552	77.6455	134.31	125.869	156.015	150.279	130.089	153.147	0.233757	1789.97	369.052	1691.8	1888.13	319.15	418.953	0.227984	6.67889	11.5807	0.00475364	0.00977448
GL4_0289	CDS	309601	311679	.	diguanylate cyclase/phosphodiesterase (GGDEF & EAL domains) with PAS/PAC sensor(s)	Q9ABX9	CC_0091	2079	8002	8861	1312	1698	313.339	307.654	323.297	310.248	310.497	316.772	150.716	147.982	155.506	149.229	149.349	152.368	0.0286792	8433.18	1506.02	7970.7	8895.66	1302.38	1709.65	0.0207057	8.84854	0.137896	0.716401	0.764635
GL4_0290	CDS	311707	312276	.	hypothetical protein	NA	NA	570	662	689	113	157	25.9223	23.9221	27.845	28.686	24.9222	28.2655	45.4777	41.9686	48.8508	50.3264	43.7232	49.5886	0.177789	676.113	134.923	639.034	713.191	116.679	153.166	0.180861	5.2489	2.86095	0.11472	0.160329
GL4_0291	CDS	312438	313235	1.3.1.26	dihydrodipicolinate reductase	Q576R4	dapB,BruAb2_0991	798	2112	2308	1312	1798	82.7008	80.1339	323.297	328.519	81.4173	325.908	103.635	100.418	405.134	411.678	102.027	408.406	1.99051	2210.93	1552.07	2089.68	2332.18	1342.21	1761.94	1.99549	8.00532	1287.29	2.53194e-14	2.1072e-12
GL4_0292	CDS	313527	314090	5.4.2.1	phosphoglycerate mutase	Q89WK1	gpmA,blr0686	564	4669	5281	1623	2063	182.827	183.357	399.933	376.938	183.092	388.435	324.161	325.1	709.1	668.33	324.631	688.715	1.08276	4973.39	1845.95	4700.65	5246.13	1596.35	2095.54	1.07614	8.62011	375.964	6.21945e-11	1.32722e-09
GL4_0293	CDS	314112	314618	.	hypothetical protein	NA	NA	507	1735	1835	298	421	67.9384	63.7113	73.4319	76.9224	65.8248	75.1771	134.001	125.663	144.836	151.721	129.832	148.278	0.190289	1786.44	359.156	1688.47	1884.41	310.593	407.719	0.191616	6.66342	7.60397	0.016381	0.0291294
GL4_0294	CDS	314661	315371	4.2.99.18	endonuclease III	P0AB83	nth,b1633,JW1625	711	977	1053	198	242	38.2569	36.5602	48.7903	44.2167	37.4086	46.5035	53.8072	51.4209	68.6221	62.1894	52.614	65.4057	0.308697	1015.44	220.16	959.752	1071.13	190.391	249.929	0.30051	5.87368	12.9254	0.00329238	0.00709866
GL4_0295	CDS	315368	316096	.	protein of unknown function DUF540	NA	NA	729	850	950	160	253	33.2839	32.9841	39.4265	46.2265	33.134	42.8265	45.657	45.2456	54.083	63.4109	45.4513	58.7469	0.363146	899.984	206.115	850.629	949.34	178.245	233.985	0.379516	5.72059	16.0957	0.00149634	0.00359857
GL4_0296	CDS	316204	317202	2.7.1.4	fructokinase	Q55480	slr0537	999	2892	3354	480	581	113.244	116.451	118.28	106.157	114.847	112.218	113.357	116.568	118.398	106.263	114.962	112.33	-0.0331218	3120.6	531.41	2949.47	3291.74	459.556	603.265	-0.0478763	7.39041	0.603597	0.451202	0.52556
GL4_0297	CDS	317214	318158	2.7.1.33	pantothenate kinase	A7HSG6	coaA,Plav_1229	945	1431	1628	320	458	56.0345	56.5243	78.853	83.6828	56.2794	81.2679	59.2957	59.814	83.4423	88.5532	59.5549	85.9978	0.522735	1529.09	388.529	1445.23	1612.94	335.994	441.064	0.529409	6.55595	60.9386	3.04047e-06	1.53359e-05
GL4_0298	CDS	318189	318506	3.5.4.19	phosphoribosyl-AMP cyclohydrolase	B0T797	hisE,Caul_5041	318	1222	1382	255	338	47.8505	47.9831	62.836	61.7572	47.9168	62.2966	150.473	150.89	197.597	194.205	150.682	195.901	0.376423	1301.77	296.466	1230.38	1373.16	256.38	336.553	0.371458	6.26046	27.2906	0.000167512	0.000529079
GL4_0299	CDS	318567	319343	.	imidazole glycerol phosphate synthase cyclase subunit	A7IHN9	hisF,Xaut_2289	777	1419	1474	184	235	55.5646	51.1774	45.3405	42.9377	53.371	44.1391	71.5117	65.8653	58.3533	55.2609	68.6885	56.8071	-0.269675	1447.96	209.551	1368.55	1527.37	181.216	237.885	-0.282557	6.22827	11.596	0.00473321	0.0097445
GL4_0300	CDS	319347	319658	.	hypothetical protein	NA	NA	312	545	639	91	101	21.3409	22.1861	22.4238	18.4541	21.7635	20.4389	68.4002	71.1094	71.8712	59.1477	69.7548	65.5094	-0.0892686	591.585	96.1622	559.142	624.028	83.1596	109.165	-0.114952	4.98994	0.841984	0.375644	0.449019
GL4_0301	CDS	319682	320440	5.3.1.16	phosphoribosylformimino-5-aminoimidazole carboxamide ribotide isomerase	A5E8E8	hisA,BBta_0145	759	2932	3337	439	534	114.81	115.861	108.176	97.569	115.335	102.873	151.265	152.649	142.525	128.549	151.957	135.537	-0.163832	3133.28	487.225	2961.45	3305.11	421.345	553.106	-0.178952	7.35372	8.68724	0.0113935	0.0212607
GL4_0302	CDS	320454	321104	.	imidazole glycerol phosphate synthase amidotransferase subunit	Q92TB1	hisH,R00053,SMc02572	651	1623	1864	257	333	63.5527	64.7182	63.3288	60.8436	64.1355	62.0862	97.6232	99.4135	97.2793	93.4618	98.5184	95.3705	-0.0463707	1742.75	295.043	1647.18	1838.33	255.149	334.938	-0.0563152	6.55087	0.671238	0.427478	0.501789
GL4_0303	CDS	321109	321609	.	hypothetical protein	NA	NA	501	2134	2348	293	421	83.5622	81.5227	72.1998	76.9224	82.5425	74.5611	166.791	162.72	144.111	153.538	164.755	148.825	-0.145782	2241.54	356.568	2118.61	2364.46	308.355	404.782	-0.146176	6.88507	4.90702	0.0453412	0.0713331
GL4_0304	CDS	321668	322300	4.2.1.19	imidazoleglycerol-phosphate dehydratase	B7KPM4	hisB,Mchl_2771	633	2393	2559	399	458	93.704	88.8486	98.3198	83.6828	91.2763	91.0013	148.032	140.361	155.324	132.2	144.196	143.762	-0.00432334	2477.89	429.44	2342	2613.77	371.374	487.507	-0.0225304	7.06763	0.10581	0.750174	0.795075
GL4_0305	CDS	322418	322987	.	hypothetical protein	NA	NA	570	1157	1254	218	257	45.3053	43.539	53.7186	46.9574	44.4221	50.338	79.483	76.3841	94.2432	82.3814	77.9336	88.3123	0.17822	1205.96	237.761	1139.83	1272.1	205.612	269.91	0.163419	6.08341	4.03947	0.0658089	0.0991303
GL4_0306	CDS	323056	323634	.	ATP-dependent protease HslV	P61477	hslV,RPA0308	579	2574	2732	352	445	100.792	94.8552	86.7383	81.3075	97.8234	84.0229	174.079	163.826	149.807	140.428	168.952	145.117	-0.218003	2655.44	398.732	2509.81	2801.06	344.818	452.647	-0.229391	7.10297	12.9208	0.00329642	0.00710276
GL4_0307	CDS	323667	324971	.	ATP-dependent hsl protease ATP-binding subunit HslU	A7HSH7	hslU,Plav_1240	1305	3765	4062	449	592	147.428	141.033	110.641	108.166	144.231	109.404	112.972	108.071	84.7821	82.8861	110.521	83.8341	-0.394605	3916.38	520.449	3701.6	4131.16	450.076	590.821	-0.405621	7.60155	47.8182	1.09693e-05	4.76557e-05
GL4_0308	CDS	324984	325526	.	hypothetical protein	NA	NA	543	764	822	113	151	29.9164	28.5399	27.845	27.5897	29.2281	27.7174	55.0946	52.5597	51.2799	50.8098	53.8271	51.0449	-0.0751344	793.377	131.98	749.868	836.887	114.134	149.825	-0.0816223	5.41669	0.662393	0.430463	0.504227
GL4_0309	CDS	325523	327328	.	hypothetical protein	NA	NA	1806	1334	1453	217	317	52.2362	50.4483	53.4722	57.9202	51.3422	55.6962	28.9237	27.9337	29.6081	32.071	28.4287	30.8395	0.113596	1393.97	266.697	1317.52	1470.41	230.635	302.758	0.120108	6.28019	2.44497	0.14206	0.192634
GL4_0310	CDS	327356	327880	.	hypothetical protein	NA	NA	525	475	489	69	94	18.5998	16.9781	17.0027	17.1751	17.789	17.0889	35.4283	32.3393	32.3861	32.7144	33.8838	32.5502	-0.0562325	482.589	81.4654	456.124	509.055	70.4501	92.4808	-0.0604626	4.70952	0.200769	0.661523	0.717099
GL4_0311	CDS	328121	328306	.	hypothetical protein	NA	NA	186	294	316	39	63	11.5123	10.9715	9.61021	11.511	11.2419	10.5606	61.8942	58.9868	51.6678	61.8868	60.4405	56.7773	-0.0886864	305.154	50.9049	288.419	321.888	44.0218	57.788	-0.0775591	4.05255	0.221461	0.645776	0.70325
GL4_0312	CDS	328377	328838	.	thioredoxin domain-containing protein EC-YbbN	P9WG67	trxA,trx,trxC,Rv3914,MTV028.05	462	1006	1101	141	198	39.3925	38.2268	34.7446	36.1773	38.8096	35.4609	85.2652	82.742	75.2048	78.3058	84.0036	76.7553	-0.128582	1053.76	169.406	995.975	1111.55	146.5	192.312	-0.130921	5.81119	2.21572	0.160613	0.215336
GL4_0313	CDS	328942	329592	.	Smr protein/MutS2	Q0HKC5	Shewmr4_1414	651	643	654	82	112	25.1783	22.7069	20.2061	20.4639	23.9426	20.335	38.6764	34.8801	31.0385	31.4346	36.7782	31.2366	-0.228857	649.341	96.9657	613.731	684.951	83.8545	110.077	-0.237298	5.0984	3.82301	0.0725379	0.107755
GL4_0314	CDS	329617	330621	.	membrane-bound lytic murein transglycosylase A precursor	P0A935	mltA,mlt,ygdM,b2813,JW2784	1005	987	1045	108	170	38.6485	36.2825	26.6129	31.0613	37.4655	28.8371	38.4562	36.102	26.4805	30.9068	37.2791	28.6936	-0.366403	1016.69	138.819	960.938	1072.45	120.049	157.59	-0.366473	5.70895	12.7469	0.00345261	0.00741053
GL4_0315	CDS	330631	331356	.	transporter	O43615	TIMM44,MIMT44,TIM44	726	9273	10045	1333	1683	363.108	348.763	328.472	307.507	355.936	317.989	500.149	480.39	452.441	423.563	490.269	438.002	-0.162287	9666.43	1510.82	9136.32	10196.5	1306.54	1715.11	-0.1716	8.96592	8.84877	0.0108131	0.0203258
GL4_0316	CDS	331655	332173	.	protein export cytoplasm chaperone protein	A4YJU2	secB,BRADO0203	519	2959	3528	558	719	115.867	122.492	137.5	131.371	119.18	134.435	223.251	236.016	264.932	253.123	229.634	259.028	0.173064	3239.09	638.797	3061.46	3416.73	552.422	725.172	0.163876	7.52017	7.4059	0.0175491	0.0309433
GL4_0317	CDS	332231	332920	2.7.7.7	DNA polymerase III epsilon subunit	Q4UN31	dnaQ,RF_0176	690	1706	1941	309	381	66.8028	67.3916	76.1424	69.6139	67.0972	72.8781	96.8156	97.669	110.351	100.89	97.2423	105.621	0.118068	1822.97	345.275	1722.99	1922.94	298.589	391.962	0.105566	6.66491	2.52045	0.136543	0.186598
GL4_0318	CDS	332944	333567	2.7.1.24	dephospho-CoA kinase	Q2J352	coaE,RPB_0397	624	705	750	113	157	27.6061	26.04	27.845	28.686	26.8231	28.2655	44.2405	41.7308	44.6233	45.9712	42.9857	45.2973	0.0738934	727.952	134.928	688.031	767.873	116.683	153.172	0.0743671	5.32932	0.51967	0.483825	0.556357
GL4_0319	CDS	333567	334385	1.1.1.25	shikimate 5-dehydrogenase I alpha	Q1QP91	aroE,Nham_1109	819	1246	1378	193	255	48.7903	47.8442	47.5582	46.592	48.3173	47.0751	59.573	58.4179	58.0686	56.8888	58.9955	57.4787	-0.0369411	1312.16	223.986	1240.2	1384.12	193.7	254.273	-0.0444087	6.14692	0.335718	0.572277	0.640158
GL4_0320	CDS	334417	335007	.	septum formation protein Maf	Q11CM5	Meso_3479	591	1260	1362	233	242	49.3385	47.2887	57.4148	44.2167	48.3136	50.8158	83.4831	80.0148	97.1486	74.8167	81.7489	85.9827	0.0719873	1311.56	238.059	1239.64	1383.49	205.87	270.248	0.044143	6.17109	0.223039	0.644612	0.702657
GL4_0321	CDS	335037	335873	.	ATP/GTP-binding protein	Q89WP1	blr0637	837	1215	1388	261	305	47.5764	48.1914	64.3145	55.7276	47.8839	60.0211	56.8416	57.5764	76.8393	66.5802	57.209	71.7097	0.320906	1301.1	283.375	1229.74	1372.45	245.059	321.692	0.30706	6.23851	15.7333	0.00162953	0.003861
GL4_0322	CDS	336145	336294	.	hypothetical protein	NA	NA	150	58	63	16	16	2.27114	2.18736	3.94265	2.92342	2.22925	3.43303	15.1409	14.5824	26.2843	19.4894	14.8617	22.8869	0.590674	60.5086	16.0174	57.1903	63.827	13.8516	18.1832	0.586854	1.90071	4.84505	0.0493243	0.0769451
GL4_0323	CDS	336303	337346	4.1.1.37	uroporphyrinogen III decarboxylase	Q2VYH1	hemE,amb4550	1044	1860	2178	331	429	72.8331	75.6203	81.5636	78.3841	74.2267	79.9738	69.7635	72.4332	78.126	75.0806	71.0983	76.6033	0.106152	2017.45	380.067	1906.82	2128.09	328.677	431.458	0.0978289	6.80901	2.26652	0.156251	0.209996
GL4_0324	CDS	337362	337790	.	protoporphyrinogen IX oxidase, novel form, HemJ	Q9ZC85	RP883	429	669	756	131	151	26.1964	26.2484	32.2804	27.5897	26.2224	29.9351	61.0639	61.185	75.2458	64.3118	61.1244	69.7788	0.188156	712.386	141.183	673.318	751.454	122.093	160.274	0.170911	5.32195	2.69159	0.124989	0.172934
GL4_0325	CDS	338062	339327	.	transcription termination factor Rho	P52156	rho,RHOS4_28440,RSP_1231	1266	33146	37900	2642	3057	1297.92	1315.89	651.03	558.555	1306.9	604.793	1025.21	1039.41	514.242	441.197	1032.31	477.719	-1.11002	35499.7	2870.28	33552.9	37446.6	2482.17	3258.38	-1.12249	10.4898	267.703	5.14618e-10	8.11926e-09
GL4_0326	CDS	339352	341397	2.7.4.9	thymidylate kinase	P37512	yyaL,BSU40820	2046	7245	7885	792	965	283.696	273.768	195.161	176.319	278.732	185.74	138.659	133.806	95.3867	86.1772	136.233	90.782	-0.580342	7569.78	880.975	7154.65	7984.91	761.854	1000.1	-0.59701	8.47146	96.9745	2.26899e-07	1.6601e-06
GL4_0327	CDS	341505	342788	.	GTPase and tRNA-U34 5-formylation enzyme TrmE	A6WX76	mnmE,trmE,Oant_0858	1284	1185	1329	206	260	46.4017	46.143	50.7616	47.5055	46.2723	49.1336	36.1384	35.9369	39.534	36.9981	36.0376	38.266	0.0842891	1256.92	233.091	1187.99	1325.85	201.573	264.608	0.0751077	6.11767	0.95521	0.346345	0.418962
GL4_0328	CDS	342938	344833	.	tRNA uridine 5-carboxymethylaminomethyl modification enzyme GidA	A5E8G8	mnmG,gidA,BBta_0165	1896	2719	2911	432	541	106.469	101.07	106.452	98.848	103.77	102.65	56.1547	53.307	56.1453	52.135	54.7309	54.1402	-0.0153728	2817.21	486.924	2662.71	2971.71	421.085	552.764	-0.0264486	7.25061	0.191386	0.668991	0.72378
GL4_0329	CDS	344830	345495	.	rRNA small subunit 7-methylguanosine (m7G) methyltransferase GidB	A7HSL2	rsmG,Plav_1275	666	1024	1133	197	268	40.0973	39.3378	48.5439	48.9672	39.7176	48.7556	60.2062	59.0658	72.8887	73.5244	59.636	73.2065	0.291371	1078.62	232.415	1019.47	1137.77	200.989	263.841	0.291584	5.9589	13.6124	0.0027513	0.0060576
GL4_0330	CDS	345492	346295	.	chromosome (plasmid) partitioning protein ParA	P0CAV7	parA,CC_3753	804	1384	1544	298	361	54.1941	53.6078	73.4319	65.9596	53.9009	69.6957	67.4055	66.6763	91.3332	82.0393	67.0409	86.6862	0.365947	1464.01	329.833	1383.72	1544.3	285.235	374.432	0.355886	6.42826	25.7071	0.000218911	0.000673962
GL4_0331	CDS	346339	347205	.	chromosome (plasmid) partitioning protein ParB	P0CAV8	parB,CC_3752	867	1459	1644	311	373	57.1309	57.0798	76.6353	68.1522	57.1053	72.3937	65.8949	65.836	88.3913	78.6069	65.8654	83.4991	0.337675	1551.29	342.398	1466.22	1636.36	296.1	388.695	0.326285	6.5031	21.8956	0.000438303	0.00124498
GL4_0332	CDS	347243	347830	2.4.2.10	orotate phosphoribosyltransferase	A5EST0	pyrE,BBta_7360	588	993	1023	163	239	38.8835	35.5186	40.1657	43.6685	37.201	41.9171	66.1283	60.4058	68.3091	74.2662	63.2671	71.2877	0.16967	1009.01	200.79	953.674	1064.34	173.64	227.94	0.176833	5.82817	3.63266	0.0791498	0.116147
GL4_0333	CDS	347901	348902	2.7.7.7	DNA polymerase III delta subunit	Q9ZDX5	RP189	1002	1296	1432	162	215	50.7482	49.7191	39.9193	39.2834	50.2337	39.6014	50.6469	49.6199	39.8397	39.205	50.1334	39.5223	-0.335549	1364.19	188.483	1289.38	1439	162.997	213.969	-0.349427	6.12828	19.132	0.000763869	0.00203434
GL4_0334	CDS	348987	349511	.	hypothetical protein	NA	NA	525	5784	6371	922	1200	226.487	221.202	227.195	219.256	223.844	223.226	431.404	421.336	432.753	417.631	426.37	425.192	-0.00398357	6079.46	1061.37	5746.06	6412.86	917.853	1204.88	-0.0119741	8.36312	0.0461538	0.833251	0.864949
GL4_0335	CDS	349498	352104	6.1.1.4	leucyl-tRNA synthetase	B6JAI4	leuS,OCAR_4363,OCA5_c01660	2607	4655	5333	798	1005	182.278	185.162	196.64	183.627	183.72	190.133	69.9188	71.025	75.4276	70.4362	70.4719	72.9319	0.0488202	4990.91	902.843	4717.2	5264.61	780.765	1024.92	0.0392898	8.09872	0.475645	0.502603	0.574379
GL4_0336	CDS	352276	352971	.	hypothetical protein YggS, proline synthase co-transcribed bacterial homolog PROSC	O66631	aq_274	696	934	1019	217	248	36.5732	35.3797	53.4722	45.313	35.9765	49.3926	52.5476	50.833	76.8279	65.1048	51.6903	70.9663	0.449785	976.77	232.847	923.203	1030.34	201.362	264.331	0.437327	5.85977	25.2811	0.000235711	0.000718574
GL4_0337	CDS	352982	353509	.	hypothetical protein	NA	NA	528	481	484	85	127	18.8348	16.8045	20.9453	23.2046	17.8196	22.075	35.6719	31.8267	39.6692	43.9481	33.7493	41.8087	0.300918	483.227	105.821	456.727	509.728	91.5121	120.129	0.314841	4.79583	5.76786	0.0320951	0.0528672
GL4_0338	CDS	353657	354346	.	DNA-binding response regulator	Q4LAJ9	walR,vicR,SH0017	690	2137	2377	437	585	83.6797	82.5296	107.684	106.887	83.1046	107.286	121.275	119.608	156.063	154.909	120.442	155.486	0.365774	2257.13	510.815	2133.35	2380.91	441.745	579.885	0.362401	7.06807	39.1905	3.00818e-05	0.000114842
GL4_0339	CDS	354384	355205	3.1.11.2	exodeoxyribonuclease III	P44318	xthA,HI_0041	822	1062	1248	231	323	41.5853	43.3306	56.922	59.0165	42.458	57.9692	50.5904	52.7137	69.2482	71.7962	51.652	70.5222	0.441901	1154.24	276.8	1090.94	1217.54	239.373	314.228	0.445947	6.10828	32.7099	7.2366e-05	0.000251206
GL4_0340	CDS	355546	356370	.	outer membrane lipoprotein carrier protein LolA	Q7NXL2	lolA,CV_1614	825	8259	9377	1980	2517	323.402	325.57	487.903	459.89	324.486	473.896	392.003	394.63	591.398	557.442	393.317	574.42	0.545261	8814.11	2252.37	8330.74	9297.48	1947.82	2556.93	0.537666	9.16151	90.415	3.38884e-07	2.33088e-06
GL4_0341	CDS	356485	358920	.	cell division protein FtsK	Q8FYI0	ftsK,BS1330_I1889,BR1895	2436	6348	7239	957	1186	248.572	251.339	235.82	216.698	249.955	226.259	102.041	103.177	96.8061	88.9566	102.609	92.8814	-0.142238	6789.86	1074.03	6417.5	7162.22	928.805	1219.26	-0.154295	8.46686	7.03102	0.0200385	0.034631
GL4_0342	CDS	359016	360230	2.6.1.17	N-succinyl-L,L-diaminopimelate aminotransferase alternative	Q3Z8H5	dapL,DET0739	1215	1748	2018	297	404	68.4474	70.0651	73.1854	73.8163	69.2562	73.5009	56.3353	57.6667	60.2349	60.7541	57.001	60.4945	0.0843797	1882.02	350.341	1778.81	1985.23	302.969	397.712	0.0805854	6.70269	1.50188	0.242257	0.30805
GL4_0343	CDS	360437	361858	.	ammonium transporter	O66515	amt,amtB,aq_112	1422	34389	37579	10975	15664	1346.59	1304.75	2704.41	2862.02	1325.67	2783.22	946.968	917.542	1901.84	2012.68	932.255	1957.26	1.06923	36004.5	13247.4	34030	37979	11456.1	15038.6	1.06357	11.5458	281.328	3.78511e-10	6.30032e-09
GL4_0344	CDS	361876	362214	.	nitrogen regulatory protein P-II	O54053	glnB,glnK,RHE_CH03974	339	7696	9246	2718	4114	301.357	321.022	669.758	751.684	311.189	710.721	888.957	946.967	1975.69	2217.36	917.962	2096.52	1.19061	8454.97	3388.09	7991.29	8918.64	2929.97	3846.21	1.1867	9.49354	268.123	5.09662e-10	8.07935e-09
GL4_0345	CDS	362440	363306	.	acyl-CoA thioesterase II	P0AGG2	tesB,b0452,JW0442	867	1446	1460	245	266	56.6218	50.6913	60.3718	48.6018	53.6566	54.4868	65.3078	58.4675	69.633	56.0574	61.8876	62.8452	0.0218031	1455.04	256.005	1375.24	1534.83	221.389	290.62	-0.000765506	6.30836	6.60301e-05	0.993641	0.994836
GL4_0346	CDS	363478	364725	.	2-octaprenyl-3-methyl-6-methoxy-1,4-benzoquinol hydroxylase	P72835	slr1300	1248	2611	2959	302	430	102.24	102.737	74.4175	78.5668	102.489	76.4922	81.9234	82.321	59.6294	62.9542	82.1222	61.2918	-0.416192	2784.21	365.572	2631.52	2936.89	316.141	415.003	-0.422953	7.11593	43.7476	1.73125e-05	7.05997e-05
GL4_0347	CDS	364730	365635	.	glutamyl-Q-tRNA synthetase	O68142	gluQ,RCAP_rcc01961	906	1082	1182	124	170	42.3685	41.0391	30.5555	31.0613	41.7038	30.8084	46.7643	45.297	33.7258	34.284	46.0307	34.0049	-0.426046	1132.32	146.954	1070.22	1194.42	127.084	166.825	-0.4397	5.84649	24.101	0.000290627	0.000864684
GL4_0348	CDS	365660	365872	.	UPF0434 protein YcaR	A4YK44	BRADO0313	213	286	351	48	51	11.1991	12.1867	11.828	9.31839	11.6929	10.5732	52.5777	57.2148	55.5303	43.7483	54.8963	49.6393	-0.142494	318.091	49.5935	300.647	335.535	42.8877	56.2992	-0.175044	4.09501	1.06371	0.321294	0.393375
GL4_0349	CDS	365869	366546	.	uncharacterized protein, similar to the N-terminal domain of Lon protease	A5FG89	lon,Fjoh_2754	678	1653	1762	258	345	64.7274	61.1768	63.5752	63.0362	62.9521	63.3057	95.4682	90.2312	93.7688	92.9737	92.8497	93.3712	0.00799524	1708.66	301.436	1614.96	1802.37	260.677	342.195	0.003101	6.53993	0.00195337	0.965423	0.97214
GL4_0350	CDS	366566	367480	.	thioredoxin domain-containing protein EC-YbbN	Q4UNK3	trxA,RF_0002	915	4733	5116	686	772	185.333	177.628	169.041	141.055	181.48	155.048	202.549	194.129	184.744	154.158	198.339	169.451	-0.225865	4928.19	732.543	4657.93	5198.46	633.492	831.594	-0.244015	7.97782	12.5811	0.00360963	0.00768807
GL4_0351	CDS	367611	368105	.	similarity to aminoacyl-tRNA editing enzymes YbaK, ProX	Q9L4Q7	proX,prdX,CLOST_2238	495	605	650	118	156	23.6903	22.568	29.077	28.5033	23.1292	28.7902	47.8592	45.592	58.7415	57.5825	46.7256	58.162	0.309906	627.812	136.989	593.383	662.242	118.466	155.512	0.309683	5.17475	8.71788	0.0112807	0.0210856
GL4_0353	CDS	368466	370460	.	hypothetical protein	NA	NA	1995	15047	16690	2506	2841	589.204	579.478	617.518	519.089	584.341	568.303	295.34	290.465	309.533	260.195	292.903	284.864	-0.0400102	15871.1	2695.78	15000.7	16741.5	2331.27	3060.28	-0.0515818	9.72839	0.545834	0.473236	0.546635
GL4_0354	CDS	370564	370680	.	hypothetical protein	NA	NA	117	523	666	97	129	20.4794	23.1236	23.9023	23.57	21.8015	23.7362	175.038	197.637	204.293	201.453	186.337	202.873	0.122034	593.424	112.984	560.88	625.967	97.707	128.261	0.113067	5.04423	0.829502	0.379098	0.452498
GL4_0355	CDS	370894	371505	.	LemA family protein	A8AVK0	lemA,SGO_0494	612	4380	4771	785	963	171.51	165.649	193.436	175.953	168.58	184.695	280.245	270.669	316.072	287.505	275.457	301.789	0.131256	4578.08	876.054	4327.02	4829.15	757.599	994.51	0.12039	8.00603	4.27331	0.0593624	0.0905671
GL4_0356	CDS	371534	372310	.	beta-propeller domains of methanol dehydrogenase type	P55140	ygcG,b2778,JW5445	777	932	1070	164	215	36.4948	37.1505	40.4122	39.2834	36.8227	39.8478	46.9689	47.8127	52.0105	50.5578	47.3908	51.2842	0.111641	1000.65	189.502	945.77	1055.52	163.879	215.126	0.105382	5.79625	1.52881	0.2383	0.303714
GL4_0357	CDS	372316	373083	.	hypothetical protein	NA	NA	768	473	506	87	121	18.5215	17.5684	21.4382	22.1083	18.0449	21.7732	24.1166	22.8755	27.9143	28.7869	23.496	28.3506	0.260842	489.802	103.923	462.941	516.663	89.8708	117.975	0.269253	4.80416	4.78653	0.0476742	0.0746859
GL4_0358	CDS	373245	373847	.	hypothetical protein	NA	NA	603	906	1000	143	168	35.4767	34.7201	35.2374	30.6959	35.0984	32.9667	58.8337	57.5789	58.4369	50.9053	58.2063	54.6711	-0.0888231	953.134	155.643	900.864	1005.4	134.598	176.689	-0.108364	5.67323	1.33502	0.268839	0.33734
GL4_0359	CDS	373840	375207	.	major facilitator superfamily MFS_1	P42306	yxiO,S3AR,BSU39100	1368	1461	1560	246	333	57.2092	54.1633	60.6182	60.8436	55.6862	60.7309	41.8196	39.5931	44.3116	44.4763	40.7063	44.394	0.122234	1511.44	289.4	1428.56	1594.33	250.269	328.531	0.121238	6.39812	2.81755	0.11725	0.163179
GL4_0360	CDS	375405	376274	.	Mlr2412 protein	NA	NA	870	6440	7409	1171	1455	252.175	257.241	288.553	265.848	254.708	277.2	289.856	295.679	331.67	305.573	292.768	318.621	0.121688	6919.24	1316.23	6539.79	7298.7	1138.26	1494.2	0.111841	8.60137	3.72454	0.0758717	0.11188
GL4_0361	CDS	376341	377927	3.5.4.10	IMP cyclohydrolase	Q89WU7	purH,blr0581	1587	2643	2894	304	442	103.493	100.48	74.9104	80.7594	101.987	77.8349	65.2132	63.3143	47.2025	50.8881	64.2638	49.0453	-0.383049	2769.48	372.445	2617.6	2921.36	322.084	422.805	-0.388437	7.11758	35.2703	5.04226e-05	0.000180686
GL4_0362	CDS	377931	379709	.	heparinase II/III-like	NA	NA	1779	4688	5145	672	887	183.571	178.635	165.591	162.067	181.103	163.829	103.188	100.413	93.0811	91.1	101.8	92.0906	-0.143137	4918.44	779.361	4648.71	5188.17	673.979	884.742	-0.151783	8.00643	7.325	0.0180542	0.0316828
GL4_0363	CDS	379840	381198	.	16S rRNA m(5)C 967 methyltransferase	A6TEU2	rsmB,sun,KPN78578_36520,KPN_03689	1359	1714	1749	218	319	67.116	60.7254	53.7186	58.2856	63.9207	56.0021	49.3863	44.6839	39.528	42.8886	47.0351	41.2083	-0.186562	1733.82	268.198	1638.74	1828.91	231.933	304.462	-0.186518	6.5079	5.09226	0.0420132	0.0665171
GL4_0364	CDS	381330	382286	.	probable protease htpX homolog	Q98ET0	htpX,mlr4097	957	2731	2861	234	298	106.939	99.3341	57.6613	54.4486	103.137	56.0549	111.744	103.797	60.2521	56.8951	107.771	58.5736	-0.868546	2799.27	266.088	2645.76	2952.79	230.109	302.068	-0.888934	7.01832	154.981	1.44039e-08	1.45746e-07
GL4_0365	CDS	382509	382988	.	putative bacterial haemoglobin	Q99JA8	Ngb	480	3044	3543	814	999	119.196	123.013	200.582	182.531	121.104	191.557	248.324	256.277	417.88	380.273	252.301	399.076	0.659423	3290.56	908.503	3110.11	3471.02	785.659	1031.35	0.649241	7.75595	125.526	5.04564e-08	4.47918e-07
GL4_0366	CDS	383066	383410	.	hypothetical protein	NA	NA	345	1174	1316	834	1079	45.971	45.6916	205.511	197.148	45.8313	201.329	133.249	132.439	595.683	571.443	132.844	583.563	2.1268	1244.93	956.894	1176.65	1313.2	827.508	1086.28	2.12623	7.1634	1532.77	8.27969e-15	8.79262e-13
GL4_0367	CDS	383529	385496	6.2.1.1	acetyl-coenzyme A synthetase	A7HSR8	acsA,Plav_1331	1968	4919	5614	9644	12434	192.616	194.918	2376.43	2271.86	193.767	2324.15	97.874	99.0439	1207.54	1154.4	98.459	1180.97	3.57095	5263.55	11051.9	4974.89	5552.21	9557.48	12546.2	3.57617	10.7905	3125.95	8.51269e-17	4.04839e-14
GL4_0368	CDS	385639	386052	.	hypothetical protein	NA	NA	414	1099	1134	190	270	43.0342	39.3726	46.819	49.3327	41.2034	48.0758	103.947	95.1028	113.089	119.161	99.525	116.125	0.220497	1117.62	229.816	1056.33	1178.91	198.742	260.891	0.224132	5.99054	6.71074	0.0224984	0.0382911
GL4_0369	CDS	386122	386553	.	protein of unknown function DUF55	Q91YJ3	Thyn1,Thy28	432	679	774	133	160	26.588	26.8733	32.7733	29.2342	26.7307	31.0037	61.5462	62.2068	75.8641	67.6717	61.8765	71.7679	0.210781	726.304	146.628	686.473	766.135	126.802	166.454	0.197582	5.3568	3.86894	0.0710434	0.105818
GL4_0370	CDS	386567	386857	.	YciL protein	P0AB57	yciI,SF1254,S1340	291	411	499	75	98	16.0938	17.3253	18.4812	17.9059	16.7095	18.1936	55.305	59.5372	63.5092	61.5324	57.4211	62.5208	0.12074	454.434	86.5049	429.513	479.356	74.8081	98.2016	0.112778	4.66024	0.708502	0.415252	0.48951
GL4_0371	CDS	386911	387918	1.1.1.94	glycerol-3-phosphate dehydrogenase [NAD(P)+]	P58141	gpsA,CC_0070	1008	1576	1697	240	351	61.7123	58.9199	59.1398	64.1325	60.3161	61.6361	61.2225	58.4523	58.6704	63.6235	59.8374	61.1469	0.0307239	1637.36	295.14	1547.56	1727.15	255.233	335.048	0.034148	6.48733	0.212457	0.652513	0.709179
GL4_0372	CDS	387988	389070	.	YgjD/Kae1/Qri7 family	B8EJI6	tsaD,gcp,Msil_0004	1083	1497	1701	219	277	58.6189	59.0588	53.965	50.6117	58.8388	52.2883	54.1264	54.5326	49.8292	46.7328	54.3295	48.281	-0.167017	1598.58	248.092	1510.92	1686.25	214.546	281.637	-0.181776	6.39343	6.23617	0.0268283	0.0448576
GL4_0373	CDS	389067	390014	.	membrane protein, putative	P46125	yedI,b1958,JW1941	948	2238	2477	352	443	87.6346	86.0016	86.7383	80.9421	86.8181	83.8402	92.4416	90.719	91.4961	85.382	91.5803	88.439	-0.0498003	2357.84	397.753	2228.54	2487.15	343.97	451.535	-0.06147	6.98346	0.997107	0.336349	0.408835
GL4_0374	CDS	390293	391156	2.5.1.61	porphobilinogen deaminase	Q6H6D2	HEMC,Os02g0168800,LOC_Os02g07230,OsJ_05540,P0669G09.15-1,P0669G09.15-2	864	1595	1889	284	348	62.4563	65.5862	69.982	63.5843	64.0212	66.7832	72.2874	75.91	80.9977	73.593	74.0987	77.2953	0.0601392	1740.46	316.26	1645.01	1835.91	273.497	359.023	0.0457581	6.57912	0.399346	0.538451	0.607216
GL4_0375	CDS	391166	391882	4.2.1.75	uroporphyrinogen-III synthase	NA	NA	717	2652	2858	461	618	103.846	99.2299	113.598	112.917	101.538	113.257	144.834	138.396	158.435	157.485	141.615	157.96	0.156539	2756.82	539.272	2605.64	2908.01	466.354	612.189	0.152115	7.28127	6.86254	0.0212907	0.0364968
GL4_0376	CDS	391971	393509	.	hypothetical protein	NA	NA	1539	5496	6130	965	1229	215.21	212.834	237.791	224.555	214.022	231.173	139.838	138.294	154.51	145.91	139.066	150.21	0.11045	5813.09	1098.35	5494.29	6131.88	949.839	1246.87	0.10208	8.3448	3.33836	0.0908677	0.130952
GL4_0377	CDS	393513	395276	.	hypothetical protein	NA	NA	1764	5554	5850	759	1000	217.481	203.112	187.029	182.714	210.297	184.872	123.289	115.143	106.026	103.579	119.216	104.802	-0.184254	5710	879.384	5396.86	6023.14	760.478	998.29	-0.192872	8.20508	10.6558	0.00620208	0.0123338
GL4_0379	CDS	395604	396203	3.3.2.1	isochorismatase	P96654	yddQ,BSU05070	600	1356	1556	258	313	53.0976	54.0244	63.5752	57.1893	53.561	60.3823	88.4961	90.0407	105.959	95.3156	89.2684	100.637	0.171135	1455.44	285.754	1375.62	1535.25	247.116	324.392	0.157418	6.35443	4.58513	0.0519013	0.080625
GL4_0380	CDS	396211	396444	.	hypothetical protein	NA	NA	234	1382	1690	120	141	54.1157	58.6769	29.5699	25.7626	56.3963	27.6662	231.264	250.756	126.367	110.097	241.01	118.232	-1.0213	1533.96	130.585	1449.84	1618.09	112.928	148.242	-1.04794	6.16461	109.913	1.09904e-07	8.60874e-07
GL4_0381	CDS	396534	398999	.	hypothetical protein	Q9X447		2466	37059	42000	2616	3414	1451.14	1458.24	644.623	623.784	1454.69	634.204	588.459	591.339	261.404	252.954	589.899	257.179	-1.19454	39513.1	3016.02	37346.1	41680	2608.21	3423.83	-1.20555	10.6181	416.873	3.25506e-11	7.85224e-10
GL4_0382	CDS	399089	399940	.	outer membrane protein V	Q9AB80	CC_0351	852	5619	6102	867	1100	220.026	211.862	213.642	200.985	215.944	207.314	258.247	248.664	250.754	235.898	253.455	243.326	-0.0586067	5864.41	984.795	5542.8	6186.02	851.636	1117.95	-0.0680401	8.28945	1.42249	0.254442	0.321578
GL4_0383	CDS	400200	401393	2.7.2.1	acetate kinase	B8EIS2	ackA,Msil_2978	1194	2976	3373	220	292	116.533	117.111	54.2114	53.3524	116.822	53.7819	97.5987	98.0827	45.4032	44.6837	97.8407	45.0435	-1.10211	3173.55	255.969	2999.51	3347.59	221.358	290.58	-1.12589	7.14596	292.625	2.96536e-10	5.06241e-09
GL4_0384	CDS	401393	402802	2.3.1.8	phosphate acetyltransferase	Q9X448	pta	1410	4611	5488	272	379	180.555	190.544	67.0251	69.2484	185.55	68.1367	128.054	135.137	47.5355	49.1124	131.595	48.3239	-1.42667	5042.05	325.177	4765.54	5318.56	281.208	369.145	-1.44856	7.71892	443.358	2.21042e-11	5.57461e-10
GL4_0385	CDS	402872	405226	.	poly(3-hydroxyalkanoate) synthetase	Q9X447		2355	4269	4739	352	525	167.164	164.538	86.7383	95.9246	165.851	91.3315	70.9824	69.8677	36.8316	40.7323	70.425	38.7819	-0.844317	4504.54	437.365	4257.51	4751.57	378.226	496.503	-0.85837	7.67934	169.439	8.42446e-09	9.0177e-08
GL4_0386	CDS	405216	405980	1.3.1.9	enoyl-[acyl-carrier-protein] reductase [NADH]	Q9ZMN7	fabI,jhp_0181	765	931	949	122	171	36.4557	32.9493	30.0627	31.244	34.7025	30.6534	47.6545	43.071	39.2977	40.8419	45.3628	40.0698	-0.17489	941.094	146.423	889.484	992.704	126.625	166.222	-0.178103	5.63926	3.08206	0.102827	0.1461
GL4_0387	CDS	406150	407328	.	deblocking aminopeptidase	O07603	yhfE,BSU10200	1179	5633	6248	618	771	220.575	216.931	152.285	140.872	218.753	146.579	187.086	183.996	129.164	119.484	185.541	124.324	-0.573824	5941.39	695.624	5615.56	6267.22	601.565	789.683	-0.588348	8.13436	100.55	1.84182e-07	1.38407e-06
GL4_0388	CDS	407399	409162	6.3.2.30	cyanophycin synthase	O86109	cphA,Ava_1814	1764	6982	8149	739	958	273.398	282.934	182.101	175.04	278.166	178.57	154.988	160.393	103.232	99.2288	157.69	101.23	-0.634391	7557.01	848.894	7142.58	7971.44	734.11	963.677	-0.648089	8.45384	120.227	6.50375e-08	5.52321e-07
GL4_0389	CDS	409170	410945	6.3.5.4	asparagine synthetase [glutamine-hydrolyzing]	P54420	asnB,asn,BSU30540	1776	10384	11692	1066	1321	406.612	405.947	262.679	241.365	406.28	252.022	228.948	228.574	147.905	135.903	228.761	141.904	-0.685086	11035.5	1196.57	10430.3	11640.7	1034.78	1358.37	-0.699103	8.96967	139.729	2.67418e-08	2.55815e-07
GL4_0390	CDS	411145	411312	.	hypothetical protein	NA	NA	168	301	388	40	71	11.7864	13.4714	9.85663	12.9727	12.6289	11.4146	70.1573	80.1868	58.6704	77.2182	75.172	67.9443	-0.14383	343.817	55.347	324.962	362.672	47.8633	62.8308	-0.128936	4.21443	0.535201	0.47749	0.550265
GL4_0391	CDS	411402	414905	.	hypothetical protein	P22525	ycbB,b0925,JW0908	3504	22692	25262	3889	4732	888.563	877.098	958.31	864.6	882.831	911.455	253.585	250.313	273.49	246.747	251.949	260.119	0.0458562	23978.6	4330.35	22663.6	25293.6	3744.83	4915.88	0.0368557	10.3642	0.365728	0.555816	0.624262
GL4_0392	CDS	414915	416864	6.3.2.8	UDP-N-acetylmuramate--alanine ligase	A5D144	murC,PTH_1860	1950	3965	4302	436	580	155.26	149.366	107.437	105.974	152.313	106.706	79.6204	76.5978	55.096	54.3456	78.1091	54.7208	-0.505628	4136.07	507.849	3909.25	4362.9	439.18	576.517	-0.519713	7.64606	78.5348	7.51831e-07	4.6178e-06
GL4_0393	CDS	416921	417202	.	hypothetical protein	NA	NA	282	1154	1199	81	125	45.1878	41.6294	19.9597	22.8392	43.4086	21.3994	160.24	147.622	70.779	80.99	153.931	75.8845	-1.01086	1177.65	102.913	1113.06	1242.23	88.9977	116.829	-1.0101	5.80615	86.9645	4.22898e-07	2.80444e-06
GL4_0394	CDS	417347	418096	.	cobalamin synthase	Q89Q75	cobS,bll3255	750	748	845	104	139	29.2899	29.3385	25.6272	25.3972	29.3142	25.5122	39.0531	39.1179	34.1696	33.8629	39.0855	34.0163	-0.195056	796.373	121.482	752.699	840.047	105.056	137.908	-0.206594	5.39508	4.14114	0.0629081	0.0954953
GL4_0395	CDS	418151	419170	2.4.2.21	nicotinate-nucleotide--dimethylbenzimidazole phosphoribosyltransferase	Q98KN9	cobT,mlr1389	1020	3867	4464	329	452	151.422	154.99	81.0707	82.5865	153.206	81.8286	148.453	151.951	79.4811	80.9672	150.202	80.2242	-0.896499	4162.42	390.179	3934.15	4390.69	337.421	442.937	-0.909103	7.55947	212.02	2.1586e-09	2.80703e-08
GL4_0396	CDS	419193	420506	.	cobyrinic acid A,C-diamide synthase	Q98KP1	cobB,mlr1387	1314	1958	2174	261	348	76.6705	75.4814	64.3145	63.5843	76.076	63.9494	58.3489	57.444	48.9456	48.3899	57.8965	48.6677	-0.245872	2066.17	304.446	1952.86	2179.48	263.28	345.612	-0.256624	6.73866	15.3952	0.00176633	0.00412834
GL4_0397	CDS	420557	421663	.	cobalt-precorrin-6 synthase, anaerobic	A5EGH4	cbiD,BBta_3153	1107	2009	2308	321	376	78.6675	80.1339	79.0994	68.7003	79.4007	73.8999	71.0637	72.3884	71.4539	62.0599	71.726	66.7569	-0.102105	2157.47	349.023	2039.15	2275.79	301.83	396.216	-0.121888	6.83818	3.10259	0.101801	0.144976
GL4_0398	CDS	421642	422403	2.1.1.133	cobalt-precorrin-4 C11-methyltransferase	P21922	cobM	762	1041	1096	168	185	40.763	38.0532	41.3978	33.802	39.4081	37.5999	53.4948	49.9386	54.3279	44.3596	51.7167	49.3437	-0.0664473	1069.3	176.765	1010.66	1127.94	152.864	200.667	-0.0906942	5.84231	0.872419	0.367417	0.439976
GL4_0399	CDS	422400	422786	.	cobalamin biosynthesis protein CobE	O87697	cbiG	387	632	653	127	145	24.7476	22.6722	31.2948	26.4935	23.7099	28.8941	63.9472	58.5845	80.8651	68.4586	61.2659	74.6618	0.281124	643.146	136.205	607.876	678.417	117.788	154.622	0.266603	5.19836	5.59076	0.0343988	0.0560791
GL4_0400	CDS	422783	424030	.	cobalt-precorrin-6y C5-methyltransferase	P21921	cobL	1248	1838	1845	231	276	71.9716	64.0585	56.922	50.4289	68.0151	53.6755	57.6695	51.3289	45.6106	40.4078	54.4992	43.0092	-0.334663	1844.5	253.738	1743.35	1945.65	219.429	288.047	-0.355724	6.55371	17.1297	0.00118045	0.00295467
GL4_0401	CDS	424064	424828	.	cobalt-precorrin-3b C17-methyltransferase	P21640	cobJ	765	1360	1414	122	193	53.2543	49.0942	30.0627	35.2637	51.1742	32.6632	69.6134	64.1754	39.2977	46.0964	66.8944	42.697	-0.635758	1388.38	157.296	1312.24	1464.52	136.027	178.565	-0.635679	6.09467	42.1863	2.08095e-05	8.29637e-05
GL4_0402	CDS	424825	425556	2.1.1.130	cobalt-precorrin-2 C20-methyltransferase	P21639	cobI	732	1413	1379	147	178	55.3296	47.879	36.2231	32.523	51.6043	34.3731	75.5869	65.4084	49.4851	44.4303	70.4977	46.9577	-0.576133	1398.63	162.595	1321.93	1475.33	140.61	184.581	-0.598498	6.1128	32.5971	7.35624e-05	0.000254828
GL4_0403	CDS	425567	426199	5.4.1.2	cobalt-precorrin-8x methylmutase	P21638	cobH	633	903	1045	110	109	35.3593	36.2825	27.1057	19.9158	35.8209	23.5107	55.8598	57.3183	42.821	31.4625	56.5891	37.1418	-0.594422	973.531	109.699	920.142	1026.92	94.8661	124.532	-0.643451	5.59768	30.1989	0.000105319	0.00035415
GL4_0404	CDS	426192	427469	.	cobalamin biosynthesis protein CobG	P21637	cobG	1278	2034	2215	256	320	79.6465	76.9049	63.0824	58.4683	78.2757	60.7754	62.3212	60.176	49.3603	45.7499	61.2486	47.5551	-0.35842	2125.34	288.154	2008.79	2241.9	249.191	327.117	-0.376695	6.74807	30.9908	9.33414e-05	0.000317724
GL4_0405	CDS	427466	430804	.	CobN component of cobalt chelatase	P29929	cobN	3339	6025	6524	652	923	235.924	226.514	160.663	168.645	231.219	164.654	70.6572	67.8388	48.1171	50.5075	69.248	49.3123	-0.481545	6279.15	785.461	5934.8	6623.51	679.255	891.667	-0.492892	8.24015	65.838	1.9969e-06	1.06876e-05
GL4_0406	CDS	430820	431890	.	CobW GTPase	P29937	cobW	1071	2740	3018	343	398	107.292	104.785	84.5206	72.72	106.038	78.6203	100.179	97.8386	78.9174	67.8992	99.0088	73.4083	-0.426592	2879.71	371.179	2721.79	3037.64	320.99	421.368	-0.449651	7.15734	45.0611	1.48889e-05	6.23462e-05
GL4_0407	CDS	431887	432312	.	hypothetical protein	NA	NA	426	3194	3460	359	469	125.069	120.131	88.4632	85.6927	122.6	87.0779	293.59	281.999	207.66	201.156	287.794	204.408	-0.491547	3329	414.034	3146.44	3511.57	358.051	470.018	-0.501183	7.34688	69.0525	1.53719e-06	8.55738e-06
GL4_0408	CDS	433049	433627	.	HupE-UreJ family cobalt transporter	NA	NA	579	5395	5880	814	972	211.255	204.154	200.582	177.598	207.704	189.09	364.862	352.598	346.429	306.732	358.73	326.58	-0.135065	5640.73	896.101	5331.39	5950.08	774.935	1017.27	-0.148096	8.20386	5.82577	0.0313816	0.0518201
GL4_0409	CDS	433635	434171	2.7.7.62	adenosylcobinamide-phosphate guanylyltransferase	P29931	cobP	537	2049	2361	308	354	80.2338	81.9741	75.896	64.6806	81.1039	70.2883	149.411	152.652	141.333	120.448	151.032	130.891	-0.205028	2203.83	331.556	2082.97	2324.69	286.725	376.388	-0.226617	6.83885	10.0085	0.00752467	0.0146661
GL4_0410	CDS	434168	434785	2.5.1.17	Cob(I)alamin adenosyltransferase	Q9I472	cobO,PA1272	618	2026	2291	301	370	79.3332	79.5437	74.1711	67.604	79.4384	70.8876	128.371	128.711	120.018	109.392	128.541	114.705	-0.162962	2158.03	335.779	2039.69	2276.38	290.377	381.182	-0.178066	6.82229	7.38852	0.0176562	0.0310992
GL4_0411	CDS	434788	436248	.	cobyric acid synthase	Q8UBP3	cobQ,cbiP,Atu2808,AGR_C_5093	1461	1454	1568	273	303	56.9351	54.4411	67.2715	55.3622	55.6881	61.3168	38.9699	37.2629	46.0448	37.8934	38.1164	41.9691	0.135525	1511.73	288.549	1428.83	1594.64	249.533	327.565	0.116717	6.39759	2.07358	0.173662	0.230143
GL4_0412	CDS	436232	437209	.	adenosylcobinamide-phosphate synthase	P0CY56	cobD,bluD	978	648	727	130	162	25.3741	25.2415	32.034	29.5996	25.3078	30.8168	25.9449	25.8093	32.7546	30.2654	25.8771	31.51	0.274508	687.454	146.08	649.754	725.154	126.327	165.832	0.271462	5.29648	7.34295	0.0179407	0.0315169
GL4_0413	CDS	437283	438269	4.1.1.81	L-threonine 3-O-phosphate decarboxylase	P21633	cobC	987	1240	1269	219	311	48.5554	44.0598	53.965	56.8239	46.3076	55.3945	49.1949	44.6401	54.6758	57.5724	46.9175	56.1241	0.253547	1255.93	264.775	1187.06	1324.81	228.973	300.576	0.260084	6.17176	9.70171	0.00826477	0.0159683
GL4_0414	CDS	438291	438512	.	hypothetical protein	NA	NA	222	2585	3092	670	916	101.222	107.354	165.098	167.366	104.288	166.232	455.956	483.579	743.687	753.899	469.767	748.793	0.671478	2834.58	792.079	2679.13	2990.03	684.978	899.181	0.666587	7.54037	125.076	5.15366e-08	4.55081e-07
GL4_0415	CDS	438662	439348	.	extensin-like protein	NA	NA	687	1032	1203	183	249	40.4106	41.7682	45.0941	45.4957	41.0894	45.2949	58.8218	60.798	65.6391	66.2237	59.8099	65.9314	0.138376	1116.88	215.925	1055.63	1178.13	186.729	245.122	0.135155	5.96334	2.71121	0.123743	0.171284
GL4_0416	CDS	439575	440501	6.5.1.1	ATP-dependent DNA ligase clustered with Ku protein, LigD	Q9I1X7	ligD,PA2138	927	1174	1292	136	189	45.971	44.8583	33.5125	34.5329	45.4146	34.0227	49.5911	48.3909	36.1516	37.2523	48.991	36.7019	-0.407029	1233.23	162.431	1165.6	1300.86	140.467	184.394	-0.41842	5.97102	23.7786	0.000308115	0.000909358
GL4_0417	CDS	440758	441612	.	short-chain dehydrogenase/reductase SDR	Q5HLD8	SERP2049	855	2843	3083	541	603	111.325	107.042	133.311	110.176	109.183	121.744	130.205	125.195	155.919	128.861	127.7	142.39	0.155934	2964.68	574.087	2802.09	3127.26	496.462	651.712	0.137503	7.3822	3.90874	0.0697783	0.104167
GL4_0418	CDS	441661	442314	.	two component transcriptional regulator, LuxR family	P29904	moxX	654	14103	16242	2228	2802	552.239	563.923	549.014	511.963	558.081	530.489	844.402	862.268	839.471	782.819	853.335	811.145	-0.073065	15159.9	2521.01	14328.5	15991.3	2180.13	2861.89	-0.0821368	9.64919	1.94698	0.186438	0.244975
GL4_0419	CDS	442315	443835	.	methanol utilization control sensor protein MoxY	P29905	moxY	1521	22837	25869	3862	4841	894.241	898.173	951.657	884.516	896.207	918.087	587.93	590.515	625.679	581.536	589.222	603.607	0.0347399	24343.3	4363.68	23008.3	25678.3	3773.64	4953.72	0.0261407	10.381	0.197846	0.663826	0.719127
GL4_0420	CDS	443828	444379	.	hypothetical protein	NA	NA	552	7790	8860	1453	1884	305.037	307.62	358.042	344.232	306.329	351.137	552.604	557.282	648.627	623.609	554.943	636.118	0.196623	8320.98	1669.51	7864.66	8777.31	1443.77	1895.25	0.188714	8.90346	11.4255	0.00496665	0.0101685
GL4_0421	CDS	444977	446854	1.1.99.8	methanol dehydrogenase large subunit protein	P15279	moxF	1878	2008600	2362445	317924	404270	78651.9	82024.2	78341.4	73865.6	80338.1	76103.5	41880.7	43676.4	41715.4	39332.1	42778.5	40523.7	-0.0781183	2.18238e+06	361875	2.0627e+06	2.30207e+06	312944	410805	-0.0862966	16.8124	1.49876	0.24272	0.308403
GL4_0422	CDS	447040	447924	.	MxaJ	P16028	moxJ,mxaJ,MexAM1_META1p4537	885	181929	203541	32550	38619	7123.89	7066.96	8020.83	7056.21	7095.43	7538.52	8049.6	7985.26	9063.08	7973.12	8017.43	8518.1	0.0873818	192722	35826	182153	203291	30981.8	40670.2	0.0786032	13.393	1.37479	0.26216	0.32983
GL4_0423	CDS	448002	448625	.	cytochrome c-L precursor	P29899	moxG	624	111856	132668	17526	21073	4380.01	4606.24	4318.68	3850.32	4493.12	4084.5	7019.24	7381.8	6920.96	6170.39	7200.52	6545.68	-0.137539	122059	19411.8	115365	128753	16787.1	22036.6	-0.146526	12.6242	4.82388	0.046936	0.0735641
GL4_0424	CDS	448651	448947	1.1.99.8	methanol dehydrogenase, small subunit	P14775	moxI,mxaI,MexAM1_META1p4535	297	139441	164817	25697	34037	5460.17	5722.46	6332.14	6219.02	5591.31	6275.58	18384.4	19267.5	21320.3	20939.5	18826	21129.9	0.166554	151891	29849.2	143561	160221	25813.1	33885.2	0.158776	13.0908	6.47925	0.0244987	0.0413362
GL4_0425	CDS	449119	450177	.	methanol dehydrogenase regulatory protein MoxR	P30621	moxR,mxaR,MexAM1_META1p4534	1059	33538	39277	5624	6813	1313.27	1363.7	1385.84	1244.83	1338.48	1315.33	1240.1	1287.72	1308.63	1175.47	1263.91	1242.05	-0.025149	36360.1	6249.9	34366.1	38354.1	5404.82	7094.98	-0.0344058	10.9311	0.294972	0.596299	0.661473
GL4_0426	CDS	450174	451064	.	hypothetical protein	P64854	Mb1516	891	11708	12850	1660	2073	458.457	446.153	409.05	378.765	452.305	393.908	514.542	500.733	459.091	425.101	507.637	442.096	-0.199018	12284.4	1871.32	11610.7	12958.1	1618.29	2124.36	-0.208643	9.2944	12.8168	0.00338884	0.00728306
GL4_0427	CDS	451061	451981	.	MxaA protein	NA	NA	921	12973	13825	2020	2537	507.991	480.005	497.76	463.544	493.998	480.652	551.565	521.178	540.456	503.305	536.371	521.88	-0.0394379	13415.3	2283.99	12679.6	14151	1975.16	2592.81	-0.0482078	9.48796	0.656966	0.432312	0.506036
GL4_0428	CDS	451978	453018	.	MoxR-like ATPases	NA	NA	1041	10383	11673	1497	1763	406.573	405.287	368.884	322.124	405.93	345.504	390.56	389.325	354.356	309.437	389.942	331.896	-0.231883	11025.9	1638.81	10421.2	11630.6	1417.22	1860.41	-0.244121	9.12576	14.8289	0.00202646	0.00466857
GL4_0429	CDS	453015	453632	.	MxaK protein	NA	NA	618	6151	7061	714	879	240.858	245.158	175.941	160.605	243.008	168.273	389.738	396.696	284.694	259.879	393.217	272.286	-0.528577	6601.41	798.301	6239.38	6963.43	690.359	906.244	-0.5417	8.29593	81.5523	6.08261e-07	3.79195e-06
GL4_0430	CDS	453638	454639	.	MxaL protein	NA	NA	1002	12321	13768	1690	2192	482.46	478.026	416.442	400.508	480.243	408.475	481.497	477.072	415.611	399.709	479.284	407.66	-0.232988	13044.1	1942.22	12328.7	13759.4	1679.6	2204.84	-0.241565	9.36721	18.1356	0.00094506	0.00245215
GL4_0431	CDS	454636	455169	.	MxaD protein	NA	NA	534	12606	14445	1700	2073	493.62	501.531	418.907	378.765	497.576	398.836	924.382	939.197	784.469	709.298	931.79	746.884	-0.318738	13516.1	1893.76	12774.9	14257.3	1637.7	2149.83	-0.329302	9.38377	29.4425	0.000118451	0.000392754
GL4_0432	CDS	455172	456146	.	hypothetical protein	Q79FU0	PE_PGRS18,Rv0980c,LH57_05345	975	15218	16666	2074	2454	595.9	578.645	511.066	448.379	587.272	479.723	611.179	593.482	524.17	459.876	602.33	492.023	-0.291293	15950	2276.9	15075.3	16824.7	1969.03	2584.77	-0.302362	9.63066	22.3189	0.00040422	0.00115616
GL4_0433	CDS	456160	457062	.	hypothetical protein	NA	NA	903	5312	6056	785	1045	208.005	210.265	193.436	190.936	209.135	192.186	230.349	232.851	214.215	211.446	231.6	212.831	-0.121383	5681.07	914.528	5369.52	5992.62	790.87	1038.19	-0.129012	8.22095	5.2406	0.0395557	0.0632473
GL4_0434	CDS	457046	457669	.	hypothetical protein	NA	NA	624	14674	16648	3757	4917	574.598	578.02	925.784	898.402	576.309	912.093	920.83	926.313	1483.63	1439.75	923.572	1461.69	0.661764	15654.2	4337.79	14795.7	16512.7	3751.25	4924.32	0.654524	10.0709	130.994	3.92221e-08	3.59698e-07
GL4_0435	CDS	458001	458348	.	hypothetical protein	NA	NA	348	2534	2712	343	401	99.2252	94.1608	84.5206	73.2681	96.693	78.8943	285.13	270.577	242.875	210.541	277.854	226.708	-0.292323	2625	372.631	2481.04	2768.95	322.245	423.016	-0.310422	7.06403	20.4742	0.000579715	0.00160022
GL4_0436	CDS	458619	459341	.	hypothetical protein	P29904	moxX	723	3786	4343	882	1086	148.251	150.789	217.339	198.427	149.52	207.883	205.049	208.56	300.607	274.449	206.805	287.528	0.473482	4061.96	986.299	3839.2	4284.72	852.936	1119.66	0.463945	7.98033	65.2134	2.1037e-06	1.11694e-05
GL4_0437	CDS	459716	461641	1.1.99.8	methanol dehydrogenase large subunit protein	P29968	xoxF	1926	54973	61918	11163	13796	2152.61	2149.8	2750.74	2520.72	2151.2	2635.73	1117.66	1116.2	1428.21	1308.78	1116.93	1368.5	0.29282	58430.9	12528.6	55226.5	61635.3	10834.6	14222.7	0.284544	11.7774	21.9718	0.000431933	0.00122793
GL4_0438	CDS	461820	463676	.	hypothetical protein	P16028	moxJ,mxaJ,MexAM1_META1p4537	1857	6639	7963	1377	1677	259.967	276.476	339.314	306.411	268.221	322.862	139.993	148.883	182.722	165.003	144.438	173.862	0.265815	7287.78	1532.45	6888.11	7687.45	1325.24	1739.66	0.256398	8.74161	16.736	0.00129065	0.00317325
GL4_0439	CDS	463679	464980	.	hypothetical protein	NA	NA	1302	2721	2875	465	567	106.548	99.8202	114.583	103.599	103.184	109.091	81.8339	76.6668	88.0056	79.5688	79.2503	83.7872	0.0793388	2800.9	516.746	2647.3	2954.51	446.874	586.618	0.0676774	7.27448	1.15974	0.301219	0.371668
GL4_0440	CDS	464986	465960	.	hypothetical protein	Q79FU0	PE_PGRS18,Rv0980c,LH57_05345	975	1568	1719	264	368	61.399	59.6838	65.0537	67.2386	60.5414	66.1462	62.9734	61.2141	66.7218	68.9627	62.0938	67.8422	0.125796	1643.93	315.774	1553.77	1734.08	273.077	358.471	0.125848	6.52117	3.3418	0.0907189	0.130794
GL4_0442	CDS	466337	466630	.	integral membrane protein YggT	Q8U530	Atu2659.1,AGR_C_4820	294	3422	3957	392	514	133.997	137.387	96.5949	93.9148	135.692	95.2548	455.773	467.304	328.554	319.438	461.538	323.996	-0.50915	3686.74	453.01	3484.55	3888.92	391.756	514.264	-0.518646	7.48517	74.7463	9.91099e-07	5.93412e-06
GL4_0443	CDS	466638	466997	.	hypothetical protein	Q98EP2	msl4154	360	887	916	116	217	34.7328	31.8036	28.5842	39.6488	33.2682	34.1165	96.4799	88.3433	79.4006	110.136	92.4116	94.7681	0.0359444	902.379	165.989	852.892	951.867	143.545	188.433	0.0633849	5.63599	0.262309	0.617181	0.679205
GL4_0444	CDS	466994	467701	4.1.1.23	orotidine 5'-phosphate decarboxylase	B6JCI7	pyrF,OCAR_4421,OCA5_c01100	708	1931	1992	267	313	75.6132	69.1624	65.793	57.1893	72.3878	61.4912	106.798	97.687	92.9279	80.7759	102.243	86.8519	-0.232894	1963.92	290.363	1856.22	2071.63	251.102	329.625	-0.251731	6.66871	10.254	0.00698775	0.0137078
GL4_0445	CDS	467724	468287	.	NADPH:quinone oxidoreductase	P0AGE8	chrR,yieF,SF3747,S4025	564	2766	2996	289	448	108.31	104.021	71.2141	81.8557	106.166	76.5349	192.039	184.435	126.266	145.134	188.237	135.7	-0.469178	2882.63	367.615	2724.54	3040.71	317.908	417.322	-0.465028	7.15361	41.516	2.2557e-05	8.85523e-05
GL4_0446	CDS	468499	469656	.	chaperone protein DnaJ	Q92T07	dnaJ,R00183,SMc02858	1158	4866	5286	621	785	190.541	183.53	153.024	143.43	187.035	148.227	164.543	158.489	132.145	123.86	161.516	128.003	-0.33318	5079.23	703.817	4800.68	5357.78	608.65	798.983	-0.345275	7.98727	35.5348	4.86309e-05	0.00017483
GL4_0447	CDS	469777	471702	.	chaperone protein DnaK	Q11KJ6	dnaK,Meso_0679	1926	34828	38272	3289	4120	1363.78	1328.81	810.461	752.78	1346.29	781.62	708.089	689.931	420.8	390.851	699.01	405.826	-0.782964	36565.3	3714.85	34560.1	38570.6	3212.54	4217.15	-0.793049	10.6338	176.187	6.65435e-09	7.43367e-08
GL4_0448	CDS	472053	472649	.	alkylated DNA repair protein AlkB	P0CAT7	alkB,CC_0009	597	975	1067	143	176	38.1786	37.0463	35.2374	32.1576	37.6125	33.6975	63.9508	62.0541	59.0242	53.8653	63.0024	56.4447	-0.155952	1021.26	159.583	965.25	1077.26	138.005	181.161	-0.171884	5.75721	3.65923	0.0781846	0.114963
GL4_0449	CDS	472659	473327	.	heat shock protein GrpE	B3Q970	grpE,Rpal_0334	669	2754	3106	520	630	107.84	107.841	128.136	115.11	107.84	121.623	161.196	161.197	191.534	172.062	161.196	181.798	0.172511	2929.4	576.022	2768.75	3090.05	498.135	653.909	0.159629	7.37263	7.21087	0.0187959	0.0327771
GL4_0450	CDS	473428	474522	.	heat-inducible transcription repressor HrcA	A4YJR2	hrcA,BRADO0172	1095	4180	4532	540	663	163.679	157.351	133.064	121.139	160.515	127.102	149.478	143.7	121.52	110.629	146.589	116.075	-0.334156	4358.84	602.552	4119.8	4597.88	521.078	684.027	-0.34872	7.76988	34.2265	5.82815e-05	0.000205529
GL4_0451	CDS	474589	475509	.	putative hemolysin	NA	NA	921	1704	1802	398	525	66.7245	62.5656	98.0734	95.9246	64.645	96.999	72.4479	67.9322	106.486	104.153	70.19	105.319	0.578656	1754.41	461.464	1658.2	1850.63	399.067	523.861	0.57929	6.78178	83.4277	5.3503e-07	3.3926e-06
GL4_0452	CDS	475792	478065	.	hypothetical protein	Q54YZ9	dhkJ,DDB_G0277883	2274	2341	2448	377	531	91.6678	84.9947	92.8987	97.0209	88.3313	94.9598	40.3113	37.3767	40.8525	42.6653	38.844	41.7589	0.101863	2397.25	453.463	2265.78	2528.71	392.148	514.778	0.103717	7.06107	2.47354	0.139939	0.190379
GL4_0453	CDS	478176	479711	.	MG(2+) chelatase family protein	P45049	comM,HI_1117	1536	612	641	101	157	23.9644	22.2556	24.888	28.686	23.11	26.787	15.6018	14.4893	16.2031	18.6758	15.0456	17.4395	0.200621	627.028	128.768	592.642	661.415	111.357	146.18	0.222226	5.15025	3.69612	0.0768679	0.113277
GL4_0454	CDS	479834	480781	.	ISSpo8, transposase	P04137	VNG_0918H,VNG_5149H	948	3353	3707	355	503	131.295	128.707	87.4776	91.9049	130.001	89.6912	138.497	135.767	92.2759	96.9461	137.132	94.611	-0.530801	3530.69	428.404	3337.06	3724.32	370.477	486.33	-0.536821	7.41958	76.0431	9.00458e-07	5.43048e-06
GL4_0455	CDS	481735	481914	.	hypothetical protein	NA	NA	180	1242	1483	126	179	48.6337	51.4899	31.0484	32.7057	50.0618	31.877	270.187	286.055	172.491	181.698	278.121	177.095	-0.648246	1361.22	152.417	1286.57	1435.87	131.808	173.026	-0.652627	6.06371	50.5543	8.21219e-06	3.68442e-05
GL4_0456	CDS	481992	482150	.	hypothetical protein	NA	NA	159	12166	14965	1646	2043	476.391	519.586	405.6	373.284	497.988	389.442	2996.17	3267.83	2550.94	2347.7	3132	2449.32	-0.354575	13530.9	1849.86	12788.8	14272.9	1599.73	2099.99	-0.364717	9.37196	30.8184	9.58086e-05	0.000325789
GL4_0457	CDS	482771	482974	.	hypothetical protein	NA	NA	204	357	405	36	53	13.9792	14.0616	8.87096	9.68382	14.0204	9.27739	68.5257	68.9295	43.4851	47.4697	68.7276	45.4774	-0.585201	380.91	44.4616	360.021	401.8	38.4497	50.4734	-0.592367	4.28647	13.6932	0.00269468	0.00597025
GL4_0458	CDS	482971	483918	6.3.2.3	glutathione synthetase	Q98DE8	gshB,mll4735	948	2570	2661	246	316	100.635	92.3901	60.6182	57.7375	96.5125	59.1779	106.155	97.4579	63.9433	60.9045	101.806	62.4239	-0.696832	2619.03	281.069	2475.4	2762.66	243.064	319.074	-0.713914	6.96224	96.2518	2.36868e-07	1.71793e-06
GL4_0459	CDS	484030	484389	.	endonuclease	A4YJR8	BRADO0179	360	676	697	66	93	26.4705	24.1999	16.2634	16.9924	25.3352	16.6279	73.5292	67.2219	45.1762	47.201	70.3755	46.1886	-0.596991	687.273	79.4588	649.582	724.963	68.7147	90.2028	-0.606325	5.11488	23.3599	0.000332677	0.000973183
GL4_0460	CDS	484386	485309	.	rRNA small subunit methyltransferase I	Q98DM9	rsmI,mlr4632	924	1121	1317	159	238	43.8956	45.7263	39.1801	43.4858	44.811	41.333	47.5061	49.4874	42.4027	47.0626	48.4967	44.7326	-0.114109	1218.17	198.272	1151.37	1284.98	171.463	225.082	-0.113095	6.02228	1.6443	0.22227	0.285801
GL4_0461	CDS	485385	486584	.	radical SAM family enzyme	A4IGH2	rsad1	1200	1694	1861	190	293	66.3329	64.614	46.819	53.5351	65.4735	50.177	55.2774	53.845	39.0158	44.6126	54.5612	41.8142	-0.37599	1777.92	241.133	1680.42	1875.43	208.528	273.738	-0.376196	6.49571	22.3317	0.000403242	0.00115524
GL4_0462	CDS	486553	487188	3.6.1.15	nucleoside 5-triphosphatase RdgB	Q2RN61	Rru_A3640	636	1744	1946	287	377	68.2908	67.5652	70.7213	68.883	67.928	69.8021	107.375	106.235	111.197	108.307	106.805	109.752	0.0389055	1845.01	331.997	1743.82	1946.19	287.106	376.888	0.0316616	6.65903	0.237579	0.634127	0.693043
GL4_0463	CDS	487199	487720	2.7.7.56	ribonuclease PH	B1ZJ73	rph,Mpop_0469	522	1898	2104	317	377	74.321	73.051	78.1138	68.883	73.686	73.4984	142.377	139.944	149.643	131.96	141.161	140.801	-0.00365265	2001.21	347.439	1891.47	2110.96	300.46	394.419	-0.0199923	6.76078	0.0877306	0.77179	0.811782
GL4_0464	CDS	488059	488970	.	hypothetical protein	NA	NA	912	1465	1610	210	292	57.3658	55.8993	51.7473	53.3524	56.6326	52.5498	62.9011	61.2931	56.7404	58.5004	62.0971	57.6204	-0.106171	1537.84	250.855	1453.5	1622.17	216.936	284.775	-0.109914	6.35681	2.23155	0.159238	0.213579
GL4_0465	CDS	488943	491714	.	DNA mismatch repair protein MutS	A7HZ64	mutS,Plav_3599	2772	3222	3544	351	456	126.166	123.048	86.4919	83.3174	124.607	84.9046	45.5143	44.3896	31.202	30.0568	44.9519	30.6294	-0.538861	3384	403.571	3198.42	3569.58	349.002	458.14	-0.561744	7.3542	88.2585	3.88846e-07	2.60456e-06
GL4_0466	CDS	491740	494520	2.7.7.59	[Protein-PII] uridylyltransferase	A5ETJ9	glnD,BBta_7648	2781	9682	10820	978	1226	379.123	375.671	240.994	224.007	377.397	232.501	136.326	135.085	86.6575	80.549	135.706	83.6033	-0.692287	10250.6	1104.19	9688.49	10812.8	954.883	1253.49	-0.708595	8.86322	147.474	1.93871e-08	1.93813e-07
GL4_0467	CDS	494571	496130	.	proposed peptidoglycan lipid II flippase MurJ	O05467	murJ,mviN	1560	3844	4398	403	501	150.522	152.699	99.3055	91.5395	151.61	95.4225	96.4882	97.8839	63.6574	58.6792	97.1861	61.1683	-0.65934	4118.76	452.504	3892.88	4344.63	391.319	513.689	-0.680114	7.59849	125.289	5.10205e-08	4.51722e-07
GL4_0468	CDS	496218	497108	.	L-malyl-CoA/beta-methylmalyl-CoA lyase	B9KNB6	mcl2,RSKD131_2362	891	1161	1258	812	1214	45.4619	43.6778	200.089	221.814	44.5699	210.952	51.0235	49.0211	224.567	248.95	50.0223	236.759	2.2203	1209.97	1009.17	1143.62	1276.33	872.712	1145.62	2.24404	7.21138	1170.54	4.65112e-14	3.68656e-12
GL4_0469	CDS	497207	498253	6.1.1.2	tryptophanyl-tRNA synthetase	Q89W91	trpS,bll0802	1047	2878	3237	548	690	112.695	112.389	135.036	126.072	112.542	130.554	107.637	107.344	128.974	120.413	107.49	124.693	0.212346	3057.02	619.618	2889.37	3224.67	535.837	703.4	0.203358	7.45122	12.9306	0.00328792	0.00709363
GL4_0470	CDS	498395	499039	1.8.4.11	peptide methionine sulfoxide reductase MsrA	Q9A9I6	msrA1,CC_0994	645	3697	4182	388	467	144.765	145.199	95.6093	85.3272	144.982	90.4682	224.443	225.115	148.231	132.29	224.779	140.261	-0.676549	3938.35	428.215	3722.37	4154.34	370.314	486.116	-0.695091	7.53269	123.141	5.64922e-08	4.89746e-07
GL4_0471	CDS	499120	499437	.	hypothetical protein	NA	NA	318	6298	7239	524	627	246.614	251.339	129.122	114.561	248.976	121.842	775.517	790.373	406.043	360.256	782.945	383.15	-1.02908	6763.59	577.056	6392.67	7134.51	499.029	655.082	-1.04491	8.19751	266.403	5.30337e-10	8.32779e-09
GL4_0473	CDS	499775	501157	.	ATP-dependent RNA helicase RhlE	P25888	rhlE,b0797,JW0781	1383	60139	69346	1405	1793	2354.9	2407.7	346.214	327.605	2381.3	336.91	1702.74	1740.92	250.335	236.88	1721.83	243.608	-2.81624	64685	1601.33	61137.7	68232.4	1384.8	1817.85	-2.83002	11.014	1906.66	2.04182e-15	3.57748e-13
GL4_0474	CDS	501403	502779	1.6.1.1	soluble pyridine nucleotide transhydrogenase	P9WHH5	sthA,Rv2713,MTCY05A6.34	1377	767	818	129	210	30.0338	28.401	31.7876	38.3698	29.2174	35.0787	21.8111	20.6253	23.0847	27.8648	21.2182	25.4748	0.252877	792.948	169.141	749.462	836.434	146.27	192.011	0.276978	5.50572	6.82664	0.0215694	0.0368985
GL4_0475	CDS	503233	506472	6.2.1.3	long-chain-fatty-acid--CoA ligase	Q7TXK5	fadD29,Mb2974c	3240	3185	3401	507	666	124.717	118.083	124.933	121.687	121.4	123.31	38.4928	36.4454	38.5595	37.5578	37.4691	38.0586	0.0219415	3296	586.491	3115.25	3476.76	507.188	665.793	0.0155095	7.49089	0.0709251	0.794198	0.83141
GL4_0476	CDS	506536	507000	.	hypothetical protein	NA	NA	465	705	728	116	144	27.6061	25.2762	28.5842	26.3108	26.4411	27.4475	59.3679	54.3574	61.4714	56.5823	56.8627	59.0268	0.0529749	717.227	130.069	677.894	756.56	112.481	147.656	0.0428782	5.30049	0.158421	0.697114	0.748369
GL4_0477	CDS	507087	507812	.	failed axon connections protein	F7E235	faxc	726	702	797	104	167	27.4886	27.6719	25.6272	30.5132	27.5802	28.0702	37.8631	38.1156	35.2992	42.0291	37.9893	38.6642	0.0247577	749.334	135.251	708.24	790.428	116.963	153.539	0.0360692	5.36171	0.108305	0.747357	0.792846
GL4_0478	CDS	507945	509441	.	glucose transport protein	P31679	yaaU,yabE,b0045,JW0044	1497	877	968	185	256	34.3412	33.609	45.5869	46.7747	33.9751	46.1808	22.94	22.4509	30.4522	31.2456	22.6955	30.8489	0.426632	922.623	220.378	872.026	973.22	190.58	250.177	0.440201	5.77637	28.039	0.000148175	0.000474759
GL4_0479	CDS	509448	510362	.	UDP-galactose-lipid carrier transferase	Q04605		915	896	966	168	245	35.0852	33.5396	41.3978	44.7648	34.3124	43.0813	38.3444	36.6553	45.2435	48.9233	37.4999	47.0834	0.320686	931.392	206.284	880.314	982.47	178.392	234.177	0.331225	5.75635	14.1263	0.00241347	0.00543603
GL4_0480	CDS	510540	510779	.	transcriptional regulator, XRE family	O31834	yozG,BSU18740	240	213	263	35	58	8.34056	9.13138	8.62455	10.5974	8.73597	9.61097	34.7523	38.0474	35.9356	44.1558	36.3999	40.0457	0.134198	237.703	46.4016	224.667	250.738	40.1274	52.6757	0.149007	3.73978	0.684172	0.42317	0.497785
GL4_0481	CDS	510789	511385	.	hypothetical protein	NA	NA	597	737	739	159	196	28.8591	25.6581	39.1801	35.8119	27.2586	37.496	48.3402	42.9784	65.6283	59.9864	45.6593	62.8073	0.451556	738.972	177.622	698.446	779.497	153.605	201.639	0.449226	5.453	19.2038	0.000752435	0.00201032
GL4_0482	CDS	511413	512003	.	hypothetical protein	NA	NA	591	926	1056	206	303	36.2599	36.6644	50.7616	55.3622	36.4621	53.0619	61.3535	62.0379	85.8911	93.6755	61.6957	89.7833	0.534061	990.741	254.176	936.408	1045.07	219.808	288.545	0.543271	5.9159	43.1073	1.86574e-05	7.52853e-05
GL4_0483	CDS	512126	512587	.	hypothetical protein	NA	NA	462	2492	2738	730	945	97.5806	95.0635	179.883	172.664	96.3221	176.274	211.213	205.765	389.358	373.732	208.489	381.545	0.868753	2615.8	837.844	2472.34	2759.25	724.555	951.133	0.863497	7.51863	255.427	6.87664e-10	1.04056e-08
GL4_0484	CDS	512678	512836	.	hypothetical protein	NA	NA	159	99	121	16	12	3.8766	4.20113	3.94265	2.19256	4.03886	3.06761	24.3811	26.4222	24.7965	13.7897	25.4017	19.2931	-0.379637	109.918	14.0274	103.89	115.946	12.1307	15.9241	-0.463	2.5571	2.71546	0.123475	0.171056
GL4_0485	CDS	512826	514097	.	fosmidomycin resistance protein	P52067	fsr,b0479,JW0468	1272	1424	1600	275	386	55.7604	55.5521	67.7643	70.5274	55.6562	69.1459	43.8368	43.673	53.2738	55.4461	43.7549	54.36	0.306797	1511.86	330.225	1428.95	1594.77	285.573	374.876	0.311207	6.45961	20.3332	0.000596422	0.00163922
GL4_0486	CDS	514212	514334	.	hypothetical protein	NA	NA	123	617	712	220	295	24.1602	24.7207	54.2114	53.9005	24.4404	54.056	196.424	200.981	440.743	438.215	198.703	439.479	1.14122	664.256	257.425	627.828	700.684	222.617	292.232	1.13821	5.54616	178.915	6.06365e-09	6.88938e-08
GL4_0487	CDS	514520	515416	.	ferric siderophore transport system, periplasmic binding protein TonB	NA	NA	897	6256	6841	1712	2020	244.97	237.52	421.864	369.081	241.245	395.472	273.099	264.794	470.305	411.462	268.946	440.883	0.710994	6551.84	1876.08	6192.53	6911.15	1622.4	2129.75	0.701849	8.8123	126.394	4.84465e-08	4.31226e-07
GL4_0488	CDS	515427	516221	2.3.1.51	1-acyl-sn-glycerol-3-phosphate acyltransferase	Q59601	plsC	795	2183	2269	372	431	85.4809	78.7798	91.6666	78.7495	82.1304	85.2081	107.523	99.0941	115.304	99.056	103.309	107.18	0.0525745	2228.68	402.257	2106.46	2350.9	347.866	456.649	0.0360455	6.93385	0.243987	0.629633	0.68881
GL4_0489	CDS	516273	516662	.	hypothetical protein	NA	NA	390	1512	1735	253	324	59.2062	60.2393	62.3432	59.1992	59.7228	60.7712	151.811	154.46	159.854	151.793	153.135	155.824	0.0249447	1622.84	288.58	1533.85	1711.84	249.559	327.6	0.0145629	6.46888	0.0432547	0.838489	0.868491
GL4_0490	CDS	516752	517138	.	manganese uptake regulation protein MUR	O07315	fur	387	871	926	138	182	34.1062	32.1508	34.0054	33.2539	33.1285	33.6296	88.1298	83.0769	87.8691	85.9273	85.6034	86.8982	0.0214108	899.051	159.993	849.747	948.356	138.36	181.627	0.0156529	5.61903	0.0282672	0.869086	0.894339
GL4_0491	CDS	517179	517310	.	hypothetical protein	NA	NA	132	218	232	39	40	8.53635	8.05505	9.61021	7.30854	8.2957	8.45938	64.6693	61.0231	72.8046	55.3677	62.8462	64.0862	0.0277501	225.13	39.5807	212.784	237.476	34.2288	44.9326	-0.00184027	3.63267	9.88878e-05	0.992218	0.994009
GL4_0492	CDS	517320	517814	.	ribosomal-protein-S18p-alanine acetyltransferase	P0A947	rimI,SF4404,S4676	495	340	411	55	88	13.3136	14.2699	13.5529	16.0788	13.7918	14.8158	26.8961	28.8282	27.3795	32.4824	27.8621	29.931	0.0998736	375.08	71.3451	354.51	395.649	61.6981	80.992	0.111674	4.38475	0.549925	0.471616	0.544953
GL4_0493	CDS	517811	518503	.	TsaB protein	Q8K9L9	tsaB,BUsg_315	693	602	649	120	138	23.5728	22.5333	29.5699	25.2145	23.0531	27.3922	34.0157	32.5156	42.6694	36.3845	33.2656	39.5269	0.242119	625.787	129.186	591.469	660.106	111.718	146.654	0.229751	5.14912	4.275	0.0593188	0.0905421
GL4_0494	CDS	518513	519103	.	predicted reductase RutE in novel pyrimidine catabolism pathway	Q398D7	Bcep18194_B1060	591	983	1036	276	313	38.4919	35.97	68.0107	57.1893	37.2309	62.6	65.1301	60.8629	115.077	96.7671	62.9965	105.922	0.740497	1010.2	295.038	954.796	1065.6	255.144	334.932	0.730264	6.01466	73.2724	1.10721e-06	6.515e-06
GL4_0495	CDS	519100	519660	.	NifU-like domain protein	B4M375	GJ19011	561	3023	2754	764	931	118.373	95.6191	188.262	170.106	106.996	179.184	211.004	170.444	335.582	303.22	190.724	319.401	0.740847	2900.41	849.425	2741.35	3059.47	734.57	964.28	0.734308	7.60909	69.8983	1.43741e-06	8.09684e-06
GL4_0496	CDS	519785	520333	.	universal stress protein UspA and related nucleotide-binding proteins	NA	NA	549	3091	3441	560	761	121.036	119.472	137.993	139.045	120.254	138.519	220.466	217.617	251.353	253.27	219.042	252.311	0.203135	3266.17	659.914	3087.05	3445.29	570.683	749.144	0.198784	7.54578	12.6627	0.0035313	0.00754538
GL4_0497	CDS	520428	520667	.	hypothetical protein	NA	NA	240	1040	1014	206	257	40.7239	35.2061	50.7616	46.9574	37.965	48.8595	169.683	146.692	211.507	195.656	158.188	203.581	0.361947	1028.72	231.624	972.308	1085.14	200.305	262.943	0.35498	5.90995	13.4294	0.00288462	0.00631354
GL4_0498	CDS	520888	522177	.	murein endopeptidase	P44566	mepA,HI_0197	1290	1906	2050	389	561	74.6343	71.1761	95.8557	102.502	72.9052	99.179	57.856	55.1753	74.3067	79.4591	56.5157	76.8829	0.437352	1979.17	474.25	1870.64	2087.71	410.125	538.376	0.444828	6.90621	47.0258	1.19584e-05	5.11692e-05
GL4_0499	CDS	522433	522858	.	hypothetical protein	NA	NA	426	9483	10288	202	230	371.331	357.2	49.776	42.0241	364.266	45.9	871.669	838.498	116.845	98.6482	855.083	107.747	-2.97678	9892.68	216.491	9350.15	10435.2	187.218	245.764	-3.00772	8.44219	1519.9	8.73973e-15	8.79262e-13
GL4_0500	CDS	522985	523722	4.2.1.1	carbonic anhydrase	A0R566	cynT,MSMEG_6082,MSMEI_5922	738	9743	10464	283	368	381.512	363.311	69.7356	67.2386	372.411	68.4871	516.954	492.291	94.4927	91.1092	504.622	92.801	-2.43039	10113.5	325.567	9558.85	10668.1	281.545	369.588	-2.451	8.51889	1315.54	2.20353e-14	1.92316e-12
GL4_0501	CDS	523734	524783	.	putative membrane protein	Q9ZUA5	VIT1,At2g01770,T8O11.6	1050	7711	8285	306	331	301.944	287.656	75.4032	60.4782	294.8	67.9407	287.566	273.958	71.8126	57.5983	280.762	64.7054	-2.10039	8005.63	319.754	7566.6	8444.67	276.519	362.99	-2.1398	8.24265	728.816	9.5364e-13	3.92661e-11
GL4_0502	CDS	524890	525222	.	cytochrome c4	A4VND9	tsdB,PST_2844	333	771	796	77	88	30.1905	27.6372	18.974	16.0788	28.9138	17.5264	90.6621	82.9945	56.979	48.2847	86.8283	52.6318	-0.711596	784.343	82.5739	741.329	827.356	71.4087	93.7391	-0.741416	5.27995	36.3008	4.38417e-05	0.000159682
GL4_0503	CDS	525487	526617	3.5.1.24	choloylglycine hydrolase	P54948	yxeI,BSU39540,LP9A	1131	2661	3016	559	714	104.198	104.716	137.746	130.457	104.457	134.102	92.1293	92.5868	121.792	115.347	92.3581	118.569	0.357001	2837.65	636.916	2682.03	2993.26	550.796	723.037	0.350505	7.40067	39.2825	2.97334e-05	0.000113773
GL4_0504	CDS	526658	527734	.	hypothetical protein	NA	NA	1077	2051	2473	372	496	80.3121	85.8627	91.6666	90.6259	83.0874	91.1463	74.5702	79.724	85.1129	84.1466	77.1471	84.6298	0.13192	2259.02	433.891	2135.14	2382.91	375.223	492.56	0.125743	6.98218	3.55261	0.0821463	0.119836
GL4_0505	CDS	527806	527931	.	hypothetical protein	NA	NA	126	30	53	4	8	1.17473	1.84016	0.985663	1.46171	1.50744	1.22369	9.32323	14.6045	7.82272	11.6009	11.9638	9.71179	-0.275295	41.4284	5.99625	39.1564	43.7004	5.18547	6.80704	-0.280842	1.24754	0.418098	0.529209	0.598823
GL4_0506	CDS	527923	529878	.	transport protein	P0AGM0	yhhT,b3474,JW5680	1956	1256	1368	276	377	49.1819	47.497	68.0107	68.883	48.3395	68.4469	25.1441	24.2827	34.7703	35.2163	24.7134	34.9933	0.485206	1312.42	326.337	1240.45	1384.4	282.211	370.463	0.49818	6.31736	50.3301	8.40524e-06	3.75966e-05
GL4_0507	CDS	529875	531176	.	nitrate/nitrite transporter	Q44470	ttuB	1302	1069	1218	201	250	41.8594	42.289	49.5295	45.6784	42.0742	47.604	32.1501	32.4801	38.0411	35.0832	32.3151	36.5622	0.173106	1143.2	225.621	1080.5	1205.89	195.114	256.129	0.16492	6.0059	4.27186	0.0594	0.090583
GL4_0508	CDS	531252	531842	.	uncharacterized conserved protein	NA	NA	591	1778	1965	359	471	69.6221	68.2249	88.4632	86.0581	68.9235	87.2606	117.804	115.44	149.684	145.614	116.622	147.649	0.337755	1871.78	415.003	1769.13	1974.43	358.889	471.118	0.332796	6.78127	29.3797	0.000119624	0.000396247
GL4_0509	CDS	531839	533155	.	hypothetical protein	NA	NA	1317	3254	3500	1104	1240	127.419	121.52	272.043	226.565	124.469	249.304	96.7492	92.2705	206.563	172.031	94.5098	189.297	0.99453	3379.74	1179.24	3194.39	3565.09	1019.79	1338.69	0.986948	7.97748	205.617	2.60329e-09	3.30777e-08
GL4_0510	CDS	533198	534334	.	hypothetical protein	P0A3T2	bcsP31,BMEI0796	1137	4621	5556	1759	1812	180.947	192.905	433.445	331.077	186.926	382.261	159.144	169.661	381.218	291.185	164.403	336.201	1.02763	5079.34	1807.04	4800.78	5357.89	1562.7	2051.38	1.01501	8.61291	130.77	3.96219e-08	3.62367e-07
GL4_0511	CDS	534646	536457	.	translation elongation factor LepA	Q89BJ8	lepA,blr8150	1812	4171	4600	1041	1263	163.326	159.712	256.519	230.767	161.519	243.643	90.1359	88.1414	141.567	127.355	89.1386	134.461	0.587658	4386.72	1155.68	4146.15	4627.29	999.412	1311.94	0.58162	8.15163	99.4142	1.96653e-07	1.46456e-06
GL4_0512	CDS	536702	536929	.	hypothetical protein	NA	NA	228	22506	26083	6804	7506	881.28	905.603	1676.61	1371.45	893.442	1524.03	3865.26	3971.94	7353.56	6015.12	3918.6	6684.34	0.770293	24269.9	7234.36	22938.9	25600.9	6256.17	8212.56	0.759811	10.7747	98.7751	2.04102e-07	1.51326e-06
GL4_0513	CDS	537173	537301	.	hypothetical protein	NA	NA	129	2826	2963	1273	1485	110.659	102.876	313.687	271.33	106.767	292.508	857.824	797.485	2431.68	2103.33	827.654	2267.51	1.4529	2898.37	1385.93	2739.42	3057.32	1198.53	1573.33	1.4416	8.02612	485.434	1.24904e-11	3.46505e-10
GL4_0514	CDS	537378	537989	1.8.4.11	peptide methionine sulfoxide reductase MsrA	Q9A9E9	msrA2,CC_1039	612	752	829	192	241	29.4465	28.7829	47.3118	44.034	29.1147	45.6729	48.1152	47.0309	77.3069	71.9509	47.5731	74.6289	0.638781	790.615	216.611	747.257	833.972	187.322	245.9	0.63804	5.61386	54.8448	5.34604e-06	2.50661e-05
GL4_0515	CDS	538144	539808	.	putative cholesterol oxidase	P9WMV9	choD,Rv3409c	1665	2790	2940	455	626	109.25	102.077	112.119	114.379	105.663	113.249	65.6154	61.3075	67.3388	68.6959	63.4614	68.0174	0.098523	2868.17	539.979	2710.88	3025.47	466.966	612.993	0.0968836	7.31872	2.50038	0.137984	0.18818
GL4_0516	CDS	539912	541258	.	capsule biosynthesis protein capA	P96738	capA,pgsA,ywtB,BSU35880	1347	1638	1829	293	372	64.1401	63.503	72.1998	67.9694	63.8215	70.0846	47.617	47.144	53.6004	50.4599	47.3805	52.0301	0.132387	1733.49	332.638	1638.42	1828.55	287.66	377.615	0.124379	6.5979	3.54754	0.0823406	0.120014
GL4_0517	CDS	541650	544061	6.1.1.20	phenylalanyl-tRNA synthetase beta chain	Q92SS9	pheT,R00286,SMc00366	2412	10999	12154	1391	1721	430.694	421.988	342.764	314.45	426.341	328.607	178.563	174.953	142.108	130.369	176.758	136.238	-0.373232	11579.5	1560.52	10944.5	12214.5	1349.51	1771.53	-0.385418	9.14255	42.9466	1.90137e-05	7.6445e-05
GL4_0518	CDS	544065	545150	6.1.1.20	phenylalanyl-tRNA synthetase alpha chain	Q21C64	pheS,RPC_0447	1086	5603	6333	832	1007	219.4	219.882	205.018	183.993	219.641	194.505	202.026	202.47	188.783	169.422	202.248	179.102	-0.174422	5966.15	922.304	5638.97	6293.34	797.595	1047.01	-0.187432	8.26977	9.80499	0.00800653	0.0155144
GL4_0519	CDS	545184	545540	.	LSU ribosomal protein L20p	Q11KK1	rplT,Meso_0674	357	9868	11166	1526	1952	386.407	387.684	376.03	356.657	387.045	366.344	1082.37	1085.95	1053.31	999.039	1084.16	1026.17	-0.0792308	10513.2	1741.27	9936.69	11089.8	1505.82	1976.71	-0.0879485	9.12035	2.40992	0.144715	0.195757
GL4_0520	CDS	545602	545805	.	LSU ribosomal protein L35p	Q6G1G3	rpmI,BQ00750	204	12938	15127	2001	2814	506.62	525.21	493.078	514.156	515.915	503.617	2483.43	2574.56	2417.05	2520.37	2529	2468.71	-0.0347942	14015.3	2398.44	13246.7	14783.9	2074.13	2722.74	-0.0407871	9.55446	0.442825	0.517468	0.588538
GL4_0521	CDS	545993	546514	.	translation initiation factor 3	P0A3K9	infC,pifC,BR2117,BS1330_I2111	522	14997	17583	1893	2219	587.246	610.483	466.465	405.441	598.864	435.953	1124.99	1169.51	893.611	776.708	1147.25	835.159	-0.457587	16268.7	2068.51	15376.5	17160.9	1788.82	2348.21	-0.46938	9.59551	49.5594	9.11005e-06	4.04904e-05
GL4_0522	CDS	546672	547985	.	lipid A core - O-antigen ligase and related enzymes	Q1RJI4	rfaL,RBE_0399	1314	2652	2842	329	437	103.846	98.6744	81.0707	79.8458	101.26	80.4583	79.0303	75.0947	61.6977	60.7655	77.0625	61.2316	-0.326983	2749.07	382.932	2598.31	2899.83	331.154	434.711	-0.337705	7.12129	29.1039	0.000124936	0.000411388
GL4_0523	CDS	548176	549042	.	hypothetical protein	NA	NA	867	7625	8552	1237	1539	298.576	296.926	304.816	281.196	297.751	293.006	344.379	342.475	351.576	324.332	343.427	337.954	-0.0231084	8087.48	1391.44	7643.96	8531.01	1203.3	1579.58	-0.0330646	8.76566	0.332013	0.574379	0.642225
GL4_0524	CDS	549280	550476	.	glycosyltransferase	Q9R9N2	lpsB,R01572,SMc01219	1197	1513	1693	255	335	59.2454	58.7811	62.836	61.209	59.0132	62.0225	49.4949	49.107	52.4946	51.1354	49.3009	51.815	0.0703614	1602.94	294.997	1515.03	1690.85	255.109	334.886	0.0640931	6.46577	0.873168	0.367218	0.439896
GL4_0525	CDS	550547	551314	.	2-hydroxymuconic semialdehyde hydrolase	Q5E9H9	ABHD10	768	1067	1117	221	294	41.7811	38.7823	54.4579	53.7178	40.2817	54.0878	54.4025	50.4978	70.9087	69.945	52.4501	70.4268	0.418273	1092.88	257.462	1032.94	1152.81	222.649	292.275	0.420277	6.01963	27.4173	0.000164043	0.000520589
GL4_0526	CDS	551318	552193	.	nucleoside-diphosphate-sugar epimerases	P0AD12	yeeZ,b2016,JW1998	876	750	891	138	201	29.3682	30.9356	34.0054	36.7254	30.1519	35.3654	33.5253	35.3146	38.8189	41.924	34.4199	40.3715	0.224074	819.863	169.329	774.902	864.825	146.433	192.225	0.230439	5.54118	5.56646	0.0347299	0.0565083
GL4_0527	CDS	552190	553320	.	epoxyqueuosine (oQ) reductase QueG	F7ZDR3	queG,RLO149_c039460	1131	1504	1585	235	264	58.893	55.0313	57.9077	48.2364	56.9621	53.072	52.0716	48.6572	51.2004	42.6493	50.3644	46.9249	-0.0999942	1545.77	249.893	1461	1630.54	216.103	283.682	-0.12288	6.36156	2.14533	0.166913	0.222529
GL4_0528	CDS	553379	554065	.	glutathione S-transferase family protein	Q12390	GTT2,YLL060C,L0560	687	1770	1992	368	477	69.3089	69.1624	90.681	87.1544	69.2356	88.9177	100.886	100.673	131.996	126.862	100.78	129.429	0.357815	1880.76	422.581	1777.61	1983.9	365.441	479.72	0.351997	6.79537	33.1111	6.82897e-05	0.000238298
GL4_0529	CDS	554201	554998	3.6.1.27	undecaprenyl-diphosphatase	Q2N736	uppP,ELI_12065	798	2464	2757	464	592	96.4842	95.7232	114.337	108.166	96.1037	111.252	120.908	119.954	143.279	135.547	120.431	139.413	0.209544	2610.38	528.293	2467.22	2753.53	456.859	599.726	0.201183	7.21994	12.4224	0.0037677	0.00798388
GL4_0530	CDS	555006	555422	.	Gfa-like protein	NA	NA	417	723	847	120	158	28.3109	29.4079	29.5699	28.8687	28.8594	29.2193	67.8919	70.5225	70.911	69.2296	69.2072	70.0703	0.0176274	784.511	138.996	741.488	827.534	120.202	157.791	0.0092974	5.42136	0.00866776	0.927252	0.941391
GL4_0531	CDS	555448	556395	.	NAD-dependent epimerase/dehydratase	Q9SK66	At2g20360,F11A3.9	948	3421	3728	545	647	133.958	129.436	134.297	118.216	131.697	126.256	141.306	136.536	141.663	124.7	138.921	133.182	-0.0604273	3576.31	597.472	3380.18	3772.44	516.684	678.259	-0.0754789	7.5769	1.494	0.243431	0.309188
GL4_0532	CDS	556354	556491	.	hypothetical protein	NA	NA	138	34	47	9	8	1.33136	1.63184	2.21774	1.46171	1.4816	1.83972	9.64751	11.8249	16.0706	10.5921	10.7362	13.3313	0.288204	40.4675	8.5073	38.2482	42.6867	7.35698	9.65761	0.254841	1.29264	0.53192	0.517976	0.588829
GL4_0534	CDS	556738	557358	.	ribonuclease D related protein	Q0BVP4	rnd,GbCGDNIH1_0211	621	3867	4311	774	1067	151.422	149.678	190.726	194.955	150.55	192.841	243.836	241.028	307.127	313.938	242.432	310.532	0.355863	4089.1	918.939	3864.85	4313.35	794.685	1043.19	0.352288	7.93917	39.7966	2.78724e-05	0.000107149
GL4_0535	CDS	557489	558229	.	hypothetical protein	NA	NA	741	1559	1696	363	460	61.0466	58.8852	89.4489	84.0482	59.9659	86.7486	82.3841	79.4672	120.714	113.425	80.9257	117.07	0.52725	1628.1	411.713	1538.81	1717.39	356.043	467.383	0.522511	6.6473	66.9003	1.82934e-06	9.90225e-06
GL4_0536	CDS	558256	558984	.	OstA-like protein	P25893	R00383,SMc01137	729	1989	2359	392	528	77.8844	81.9046	96.5949	96.4728	79.8945	96.5338	106.837	112.352	132.503	132.336	109.595	132.42	0.270688	2171.78	459.802	2052.68	2290.89	397.63	521.974	0.266227	6.97463	17.461	0.00109613	0.00277281
GL4_0537	CDS	559004	559153	.	hypothetical protein	NA	NA	150	454	568	76	102	17.7775	19.721	18.7276	18.6368	18.7493	18.6822	118.517	131.473	124.851	124.245	124.995	124.548	-0.00512957	510.136	88.9775	482.16	538.112	76.9464	101.009	-0.0133164	4.79938	0.00988497	0.922329	0.937823
GL4_0538	CDS	559480	560298	.	lipopolysaccharide ABC transporter, ATP-binding protein LptB	P33982	AZC_3926	819	2062	2339	248	328	80.7429	81.2102	61.1111	59.93	80.9766	60.5206	98.5872	99.1578	74.6167	73.1747	98.8725	73.8957	-0.415205	2199.91	287.976	2079.27	2320.56	249.038	326.915	-0.427328	6.7838	41.7358	2.19661e-05	8.67439e-05
GL4_0539	CDS	560325	561866	.	RNA polymerase sigma-54 factor RpoN	P30333	rpoN2,blr0723	1542	4169	4700	610	723	163.248	163.184	150.314	132.102	163.216	141.208	105.868	105.826	97.4796	85.6692	105.847	91.5744	-0.206861	4433.48	668.446	4190.35	4676.62	578.062	758.83	-0.223499	7.834	13.2239	0.00304336	0.0066218
GL4_0540	CDS	562287	562754	.	PTS IIA-like nitrogen-regulatory protein PtsN	P30335	ptsN,blr0725	468	3442	3768	666	809	134.78	130.825	164.113	147.815	132.803	155.964	287.992	279.541	350.668	315.845	283.767	333.256	0.231176	3606.5	739.155	3408.72	3804.28	639.21	839.1	0.219384	7.69891	14.1191	0.00241785	0.00544221
GL4_0541	CDS	562801	563067	.	hypothetical protein	NA	NA	267	1560	1692	195	241	61.0858	58.7463	48.051	44.034	59.9161	46.0425	228.786	220.024	179.966	164.921	224.405	172.444	-0.378049	1626.68	218.118	1537.47	1715.89	188.625	247.61	-0.392648	6.36729	26.3781	0.000195176	0.000606662
GL4_0542	CDS	563088	563501	.	small heat shock protein	C6DGL0	ibpA,PC1_0034	414	2795	3164	209	338	109.445	109.854	51.5009	61.7572	109.65	56.629	264.361	265.349	124.398	149.172	264.855	136.785	-0.948218	2978.7	272.863	2815.34	3142.05	235.968	309.758	-0.942291	7.09222	144.028	2.23252e-08	2.19603e-07
GL4_0543	CDS	563727	564734	.	Zn-dependent hydrolases, including glyoxylases	NA	NA	1008	7233	7288	668	747	283.227	253.04	164.606	136.487	268.133	150.546	280.979	251.032	163.299	135.404	266.005	149.352	-0.828528	7279.06	711.323	6879.87	7678.25	615.142	807.505	-0.849094	8.34648	117.639	7.38948e-08	6.08901e-07
GL4_0544	CDS	564769	565596	.	hypothetical protein	NA	NA	828	7111	8084	796	928	278.449	280.677	196.147	169.558	279.563	182.853	336.292	338.982	236.892	204.78	337.637	220.836	-0.610242	7593.98	865.844	7177.52	8010.44	748.769	982.92	-0.626607	8.46718	93.4094	2.81304e-07	1.9715e-06
GL4_0545	CDS	565631	566209	.	transcriptional regulator, TetR family	P94548	fadR,ysiA,BSU28550	579	2862	3238	364	437	112.069	112.424	89.6953	79.8458	112.246	84.7706	193.556	194.169	154.914	137.903	193.862	146.409	-0.402634	3049.2	401.073	2881.98	3216.42	346.842	455.304	-0.420413	7.24526	44.5336	1.58118e-05	6.53072e-05
GL4_0546	CDS	566305	566616	.	hypothetical protein	NA	NA	312	1142	1268	205	279	44.7179	44.025	50.5152	50.9771	44.3715	50.7461	143.327	141.106	161.908	163.388	142.216	162.648	0.192399	1205.08	241.91	1138.99	1271.17	209.2	274.62	0.18943	6.08961	6.12362	0.0279947	0.0466671
GL4_0547	CDS	566597	567181	.	hypothetical protein	NA	NA	585	1844	2046	286	356	72.2065	71.0372	70.4749	65.046	71.6219	67.7604	123.43	121.431	120.47	111.19	122.431	115.83	-0.0792913	1945.18	321.204	1838.5	2051.85	277.773	364.636	-0.0922814	6.69841	1.94559	0.186585	0.245026
GL4_0549	CDS	567412	567528	.	hypothetical protein	NA	NA	117	762	911	201	234	29.8381	31.63	49.5295	42.755	30.734	46.1423	255.026	270.342	423.329	365.427	262.684	394.378	0.584424	835.821	217.79	789.984	881.657	188.341	247.238	0.565672	5.6715	37.0461	3.9698e-05	0.000146838
GL4_0550	CDS	567574	567936	.	hypothetical protein	NA	NA	363	4249	4888	1229	1370	166.38	169.712	302.845	250.318	168.046	276.581	458.348	467.525	834.283	689.58	462.937	761.932	0.717626	4565.23	1308.73	4314.87	4815.59	1131.77	1485.69	0.703505	8.27403	99.9382	1.90781e-07	1.42401e-06
GL4_0551	CDS	568066	569379	2.5.1.19	5-Enolpyruvylshikimate-3-phosphate synthase	P0A2Y4	aroA	1314	2194	2419	401	451	85.9117	83.9878	98.8127	82.4038	84.9498	90.6082	65.3818	63.9177	75.1999	62.7122	64.6497	68.956	0.0916594	2306.98	427.058	2180.47	2433.5	369.313	484.802	0.0725357	6.99566	1.0654	0.320925	0.393068
GL4_0552	CDS	569376	570017	2.7.4.14	cytidylate kinase	B3Q5Z9	cmk,Rpal_0066	642	612	703	69	122	23.9644	24.4082	17.0027	22.2911	24.1863	19.6469	37.3278	38.019	26.4839	34.7213	37.6734	30.6026	-0.291298	657.236	95.2591	621.193	693.279	82.3786	108.14	-0.280337	5.10754	4.52664	0.0532114	0.0824433
GL4_0553	CDS	570044	570250	.	hypothetical protein	NA	NA	207	2039	2552	322	342	79.8423	88.6056	79.3458	62.488	84.2239	70.9169	385.711	428.046	383.313	301.875	406.879	342.594	-0.247436	2291.06	332.905	2165.41	2416.7	287.891	377.919	-0.276754	6.8803	8.99345	0.0103224	0.0195246
GL4_0554	CDS	570212	572056	.	SSU ribosomal protein S1p	P14129	rpsA,R00255,SMc00335	1845	78588	88842	8973	11371	3077.31	3084.6	2211.09	2077.64	3080.96	2144.36	1667.92	1671.87	1198.42	1126.09	1669.9	1162.26	-0.522453	83685.7	10195.2	79096.3	88275.1	8816.63	11573.7	-0.531046	11.915	79.4199	7.0601e-07	4.3605e-06
GL4_0555	CDS	572167	573129	.	hypothetical protein	O34525	sppA,yteI,BSU29530	963	8465	9391	1846	2201	331.469	326.056	454.883	402.153	328.762	428.518	344.204	338.584	472.361	417.604	341.394	444.982	0.381329	8929.37	2033.71	8439.68	9419.06	1758.72	2308.7	0.371592	9.09406	36.5697	4.22913e-05	0.000154882
GL4_0556	CDS	573181	573480	.	integration host factor beta subunit	Q92SJ7	ihfB,himD,R00386,SMc01134	300	2635	2982	563	702	103.18	103.535	138.732	128.265	103.358	133.498	343.934	345.117	462.44	427.55	344.526	444.995	0.368234	2807.74	633.272	2653.76	2961.72	547.644	718.9	0.35751	7.38803	39.4342	2.91699e-05	0.000111745
GL4_0557	CDS	573526	573870	.	permeases of the major facilitator superfamily	NA	NA	345	1033	1112	180	210	40.4498	38.6087	44.3548	38.3698	39.5292	41.3623	117.246	111.909	128.565	111.217	114.577	119.891	0.0648442	1072.99	195.211	1014.15	1131.84	168.816	221.607	0.0475024	5.88208	0.289958	0.599404	0.664252
GL4_0558	CDS	573881	574099	.	hypothetical protein	NA	NA	219	551	570	94	82	21.5758	19.7904	23.1631	14.9825	20.6831	19.0728	98.5197	90.3673	105.767	68.4133	94.4435	87.0904	-0.115663	561.123	88.3709	530.35	591.895	76.4218	100.32	-0.160561	4.90492	1.05011	0.324289	0.396751
GL4_0559	CDS	574210	574869	5.3.1.24	phosphoribosylanthranilate isomerase	A6UEI0	trpF,Smed_3236	660	2468	2556	467	604	96.6408	88.7445	115.076	110.359	92.6927	112.718	146.426	134.461	174.358	167.211	140.443	170.784	0.280372	2515.4	535.656	2377.46	2653.35	463.227	608.084	0.274614	7.19365	19.0031	0.000784872	0.0020836
GL4_0560	CDS	574866	576092	4.2.1.20	tryptophan synthase beta chain	A7HPD3	trpB,Plav_0143	1227	6250	7344	1129	1335	244.735	254.984	278.203	243.923	249.859	261.063	199.458	207.811	226.735	198.796	203.634	212.765	0.0629783	6788.28	1237.63	6416.01	7160.56	1070.28	1404.98	0.0505794	8.54768	0.626704	0.442861	0.51693
GL4_0561	CDS	576095	576931	4.2.1.20	tryptophan synthase alpha chain	A8HQ60	trpA,AZC_1020	837	6243	7109	1230	1468	244.461	246.825	303.091	268.223	245.643	285.657	292.068	294.892	362.116	320.458	293.48	341.287	0.217037	6672.66	1354.81	6306.72	7038.59	1171.62	1538.01	0.205875	8.58998	11.3979	0.00500569	0.0102421
GL4_0562	CDS	576960	578027	6.4.1.2	acetyl-coenzyme A carboxyl transferase beta chain	A8HQ90	accD,AZC_1024	1068	8426	9348	1502	1859	329.942	324.563	370.116	339.664	327.252	354.89	308.934	303.898	346.551	318.038	306.416	332.294	0.116604	8888.36	1685.4	8400.91	9375.8	1457.51	1913.3	0.107222	8.96217	3.43642	0.0867435	0.12588
GL4_0563	CDS	578165	579466	6.3.2.12	dihydrofolate synthase	Q05865	folC,BSU28080	1302	5032	5344	719	945	197.041	185.544	177.173	172.664	191.292	174.919	151.337	142.507	136.077	132.615	146.922	134.346	-0.128184	5194.13	831.965	4909.28	5478.98	719.471	944.459	-0.136236	8.09002	5.49377	0.0357431	0.0578458
GL4_0564	CDS	579478	579810	.	thioredoxin	P10473	trxA	333	3005	3415	408	606	117.668	118.569	100.538	110.724	118.119	105.631	353.359	356.063	301.915	332.506	354.711	317.21	-0.160725	3208.83	505.737	3032.85	3384.8	437.354	574.121	-0.159529	7.39307	6.11824	0.0280519	0.0467391
GL4_0565	CDS	579874	583413	.	ATP-dependent nuclease subunit A	B7GM51	addA,Aflv_2230	3540	3033	3385	373	587	118.765	117.527	91.913	107.253	118.146	99.5829	33.5494	33.1998	25.9641	30.2974	33.3746	28.1308	-0.2388	3209	478.34	3033.02	3384.98	413.662	543.019	-0.23995	7.36796	11.2856	0.00516825	0.0105127
GL4_0566	CDS	583410	586385	.	ATP-dependent nuclease subunit B	Q1RIZ9	RBE_0584	2976	2755	3004	345	484	107.879	104.299	85.0134	88.4334	106.089	86.7234	36.2497	35.0467	28.5663	29.7155	35.6482	29.1409	-0.282019	2880.77	414.057	2722.78	3038.75	358.07	470.043	-0.292483	7.19988	22.4214	0.000396441	0.00114165
GL4_0567	CDS	586494	587222	.	nucleotidyltransferase	Q61S97	tag-335,CBG06266	729	1930	2082	256	316	75.5741	72.2872	63.0824	57.7375	73.9306	60.4099	103.668	99.1594	86.5328	79.2009	101.414	82.8669	-0.288237	2007.08	286.192	1897.01	2117.15	247.494	324.889	-0.303961	6.68561	19.0909	0.000770487	0.00204705
GL4_0568	CDS	587232	588758	.	ATPase YjeE, predicted to have essential role in cell wall biosynthesis	Q1RGZ7	tsaE,RBE_1286	1527	3169	3275	416	556	124.09	113.708	102.509	101.589	118.899	102.049	81.2641	74.4651	67.1309	66.5283	77.8646	66.8296	-0.217463	3227	485.828	3050.03	3403.97	420.137	551.519	-0.225612	7.38109	12.2435	0.00395563	0.00835551
GL4_0569	CDS	588755	590995	.	hypothetical protein	Q9RQQ9	divL,CC_3484	2241	5725	6336	904	1085	224.177	219.986	222.76	198.244	222.082	210.502	100.034	98.1644	99.4019	88.4624	99.0994	93.9322	-0.0764639	6031.74	997.991	5700.95	6362.52	863.047	1132.93	-0.0894256	8.3217	2.19319	0.162596	0.21747
GL4_0570	CDS	591328	592689	.	hypothetical protein	NA	NA	1362	807	924	160	204	31.6001	32.0813	39.4265	37.2736	31.8407	38.35	23.2013	23.5546	28.9475	27.3668	23.3779	28.1571	0.258274	865.227	182.052	817.778	912.677	157.436	206.668	0.25726	5.62716	8.35507	0.0127054	0.0233166
GL4_0571	CDS	592693	592833	.	hypothetical protein	NA	NA	141	113	128	25	37	4.4248	4.44417	6.16039	6.7604	4.43449	6.4604	31.3816	31.5189	43.6907	47.9461	31.4503	45.8184	0.528846	120.485	30.974	113.877	127.092	26.7858	35.1621	0.545526	2.85512	7.26952	0.0184103	0.0322399
GL4_0572	CDS	593082	593396	.	hypothetical protein	NA	NA	315	1412	1577	307	368	55.2905	54.7535	75.6496	67.2386	55.022	71.4441	175.525	173.821	240.157	213.456	174.673	226.807	0.374917	1494.48	337.892	1412.53	1576.44	292.204	383.581	0.360989	6.4604	26.3726	0.000195357	0.000606662
GL4_0573	CDS	593500	594720	.	probable integral membrane protein	I6YET7	Rv2963,RVBD_2963,P425_03084	1221	2359	2602	358	523	92.3727	90.3416	88.2168	95.5592	91.3571	91.888	75.6533	73.9898	72.2496	78.263	74.8216	75.2563	0.00824894	2481.02	439.726	2344.96	2617.08	380.268	499.184	0.00978988	7.07885	0.0231792	0.881344	0.903602
GL4_0574	CDS	595030	595449	.	transcriptional regulator	NA	NA	420	583	643	111	91	22.8289	22.325	27.3521	16.6269	22.5769	21.9895	54.3544	53.1548	65.1241	39.5879	53.7546	52.356	-0.0373285	613.102	101.474	579.479	646.724	87.7529	115.194	-0.0889404	5.04611	0.322304	0.57996	0.646579
GL4_0575	CDS	595431	595664	.	hypothetical protein	Q9PCQ3	XF_1725	234	393	400	56	77	15.3889	13.888	13.7993	14.0689	14.6385	13.9341	65.7646	59.3505	58.9713	60.1237	62.5576	59.5475	-0.0699972	397.025	66.4681	375.252	418.799	57.4806	75.4556	-0.0724106	4.4283	0.242633	0.630576	0.689615
GL4_0576	CDS	595725	596012	.	hypothetical protein	NA	NA	288	502	570	107	121	19.6571	19.7904	26.3665	22.1083	19.7238	24.2374	68.2538	68.7168	91.5503	76.7651	68.4853	84.1577	0.293429	535.87	114.209	506.483	565.258	98.7663	129.652	0.275742	4.93582	5.25288	0.03936	0.0629949
GL4_0577	CDS	596183	598714	3.1.6.1	arylsulfatase	P51691	atsA,PA0183	2532	11985	14060	2470	2975	469.303	488.164	608.647	543.573	478.734	576.11	185.349	192.798	240.382	214.681	189.073	227.531	0.265837	13005.4	2735.76	12292.2	13718.7	2365.84	3105.67	0.256942	9.58515	16.6071	0.00132928	0.00325381
GL4_0578	CDS	598778	600166	3.3.1.1	adenosylhomocysteinase	Q11CD0	ahcY,Meso_3576	1389	42743	47452	1297	1797	1673.71	1647.54	319.601	328.336	1660.62	323.969	1204.98	1186.13	230.094	236.383	1195.55	233.239	-2.35283	45104	1542.78	42630.4	47577.5	1334.17	1751.38	-2.36358	10.5686	1372.68	1.67844e-14	1.51014e-12
GL4_0579	CDS	600392	600967	.	Ni,Fe-hydrogenase I cytochrome b subunit	P27648	hupC	576	5866	6761	227	315	229.698	234.742	55.9363	57.5548	232.22	56.7456	398.782	407.539	97.1117	99.9215	403.16	98.5166	-2.02192	6308.59	270.759	5962.63	6654.56	234.148	307.37	-2.03604	7.9371	896.068	2.56079e-13	1.39752e-11
GL4_0580	CDS	601014	601331	.	phosphocarrier protein, nitrogen regulation associated	P23537	phbH,ptsH,H16_A0325	318	740	768	91	83	28.9766	26.665	22.4238	15.1652	27.8208	18.7945	91.1214	83.8522	70.5152	47.6894	87.4868	59.1023	-0.558042	754.754	87.2228	713.363	796.145	75.429	99.0167	-0.606968	5.24669	18.4949	0.000874512	0.00228692
GL4_0581	CDS	601332	601733	.	PTS system permease (IIAMan), nitrogen regulatory IIA protein	P69800	manX,SF1411,S1526	402	2816	2973	475	584	110.268	103.223	117.047	106.705	106.745	111.876	274.298	256.773	291.163	265.435	265.535	278.299	0.0674819	2897.61	530.208	2738.7	3056.52	458.516	601.9	0.0558103	7.31936	0.804329	0.386211	0.459505
GL4_0582	CDS	601834	602331	.	HPr kinase/phosphorylase	Q5WDH1	hprK,ABC3055	498	1594	1655	215	277	62.4171	57.4617	52.9794	50.6117	59.9394	51.7955	125.336	115.385	106.384	101.63	120.36	104.007	-0.20881	1626.22	246.045	1537.04	1715.4	212.776	279.314	-0.218447	6.40879	7.78159	0.0154103	0.0276555
GL4_0583	CDS	602348	604162	.	sensor histidine kinase ChvG	Q07737	chvG,Atu0033,AGR_C_52	1815	10735	11839	1621	2043	420.356	411.051	399.44	373.284	415.704	386.362	231.601	226.474	220.077	205.666	229.038	212.871	-0.105127	11290.5	1835.83	10671.3	11909.7	1587.6	2084.06	-0.114558	9.21176	3.98231	0.0675102	0.101235
GL4_0584	CDS	604175	604870	.	DNA-binding response regulator ChvI	P50350	chvI,R00044,SMc02560	696	7829	8725	1460	1795	306.564	302.933	359.767	327.971	304.749	343.869	440.466	435.248	516.906	471.222	437.857	494.064	0.173865	8277.3	1632.72	7823.37	8731.23	1411.95	1853.48	0.164157	8.88449	7.96709	0.0144676	0.0262039
GL4_0585	CDS	605047	605793	.	putative heme iron utilization protein	NA	NA	747	1216	1361	177	215	47.6156	47.254	43.6156	39.2834	47.4348	41.4495	63.7424	63.2584	58.3876	52.5882	63.5004	55.4879	-0.191365	1288.45	196.132	1217.79	1359.11	169.612	222.652	-0.209658	6.07951	6.60759	0.0233651	0.0395839
GL4_0586	CDS	605907	607712	4.1.1.32	phosphoenolpyruvate carboxykinase [GTP]	Q0RCJ7	pckG,FRAAL6204	1806	11181	12744	7057	9512	437.821	442.472	1738.96	1737.97	440.147	1738.46	242.426	245.001	962.877	962.332	243.713	962.604	1.97735	11955.9	8270.58	11300.2	12611.5	7152.27	9388.89	1.97437	10.5961	1089.84	7.34226e-14	5.17319e-12
GL4_0587	CDS	607838	609361	2.3.2.2	gamma-glutamyltranspeptidase	P74181	ggt,slr1269	1524	1301	1474	378	496	50.944	51.1774	93.1451	90.6259	51.0607	91.8855	33.4278	33.581	61.1188	59.4658	33.5044	60.2923	0.828927	1387.22	437.003	1311.14	1463.3	377.913	496.092	0.839467	6.53983	175.529	6.80666e-09	7.55312e-08
GL4_0588	CDS	609466	610161	6.3.5.2	glutamine amidotransferase class-I	P40194	yfeJ,STM2437	696	680	752	135	180	26.6271	26.1095	33.2661	32.8884	26.3683	33.0773	38.2574	37.5136	47.7961	47.2535	37.8855	47.5248	0.31949	716.082	157.474	676.812	755.353	136.181	178.767	0.320952	5.36942	11.0929	0.00546158	0.0110392
GL4_0589	CDS	610165	611325	.	hypothetical protein	O66504	aq_097	1161	3099	3419	151	225	121.349	118.708	37.2088	41.1105	120.029	39.1597	104.521	102.246	32.0489	35.4096	103.384	33.7292	-1.58767	3259.73	187.805	3080.97	3438.5	162.411	213.199	-1.61121	7.1089	466.559	1.60356e-11	4.27059e-10
GL4_0590	CDS	611453	612715	.	sulfate permease	O06984	yvdB,BSU34660	1263	4805	5242	158	263	188.152	182.003	38.9337	48.0537	185.077	43.4937	148.972	144.103	30.8263	38.0472	146.538	34.4368	-2.05777	5026.11	209.939	4750.47	5301.74	181.552	238.326	-2.07516	7.63045	624.628	2.5382e-12	9.18442e-11
GL4_0591	CDS	612865	613119	.	hypothetical protein	NA	NA	255	244	248	41	54	9.55444	8.61058	10.103	9.86653	9.08251	9.98479	37.4684	33.767	39.6198	38.6923	35.6177	39.156	0.133076	246.289	47.4985	232.782	259.796	41.076	53.9211	0.13154	3.78545	0.599568	0.452682	0.526916
GL4_0592	CDS	613123	616092	2.7.7.7	DNA polymerase I	Q9S1G2	polA	2970	3627	3981	532	678	142.024	138.221	131.093	123.88	140.123	127.486	47.8197	46.5389	44.1391	41.7104	47.1793	42.9247	-0.13338	3805.37	605.451	3596.69	4014.06	523.585	687.317	-0.145902	7.64173	6.58846	0.0235301	0.0398431
GL4_0593	CDS	616189	617865	1.6.99.3	NADH dehydrogenase	O05267	yumB,BSU32100	1677	3912	4444	671	855	153.184	154.296	165.345	156.22	153.74	160.782	91.3443	92.0071	98.5956	93.1545	91.6757	95.8751	0.0639342	4176.33	763.7	3947.3	4405.36	660.436	866.964	0.0548858	7.84724	0.963979	0.344218	0.416691
GL4_0594	CDS	617962	618987	.	Mll2248 protein	NA	NA	1026	1752	1893	330	432	68.604	65.7251	81.3172	78.9323	67.1646	80.1247	66.8655	64.0595	79.2565	76.932	65.4625	78.0943	0.251032	1823.39	381.014	1723.4	1923.39	329.496	432.533	0.247311	6.71245	14.9285	0.00197766	0.00456562
GL4_0596	CDS	619299	619472	.	hypothetical protein	NA	NA	174	345	406	40	67	13.5094	14.0963	9.85663	12.2418	13.8029	11.0492	77.64	81.0135	56.6473	70.3552	79.3267	63.5012	-0.316553	375.217	53.3867	354.64	395.794	46.168	60.6054	-0.306934	4.30781	3.60927	0.0800115	0.117235
GL4_0597	CDS	619469	620017	.	glycerol-3-phosphate ABC transporter, permease protein UgpE	NA	NA	549	338	400	59	77	13.2353	13.888	14.5385	14.0689	13.5616	14.3037	24.1079	25.2969	26.4818	25.6265	24.7024	26.0542	0.073945	368.697	68.0043	348.478	388.917	58.8091	77.1995	0.0672697	4.35057	0.217691	0.648575	0.705821
GL4_0598	CDS	620014	620193	.	hypothetical protein	NA	NA	180	43	39	9	14	1.68377	1.35408	2.21774	2.55799	1.51893	2.38787	9.3543	7.52268	12.3208	14.2111	8.43849	13.2659	0.595944	41.0326	11.4944	38.7824	43.2829	9.9402	13.0486	0.667436	1.38894	4.58459	0.0592103	0.0904179
GL4_0599	CDS	620190	622394	2.7.7.7	DNA polymerase I	P06225	L	2205	1837	1984	269	331	71.9324	68.8846	66.2858	60.4782	70.4085	63.382	32.6224	31.2402	30.0616	27.4277	31.9313	28.7447	-0.146828	1911.47	300.221	1806.65	2016.3	259.626	340.815	-0.164523	6.65323	5.63636	0.0337875	0.0551906
GL4_0600	CDS	622391	622510	.	hypothetical protein	NA	NA	120	151	159	13	22	5.91279	5.52049	3.2034	4.0197	5.71664	3.61155	49.2733	46.0041	26.695	33.4975	47.6387	30.0963	-0.645363	155.091	17.4822	146.586	163.596	15.1183	19.846	-0.642009	3.01626	7.47123	0.0171534	0.0303581
GL4_0601	CDS	622882	623328	.	hypothetical protein	P0CAW8	ctrA,sokA,CC_3035	447	227	252	39	61	8.88876	8.74946	9.61021	11.1455	8.81911	10.3779	19.8854	19.5737	21.4994	24.9341	19.7296	23.2167	0.224314	239.516	49.9155	226.381	252.651	43.1662	56.6648	0.243286	3.76895	2.08201	0.172851	0.229251
GL4_0602	CDS	623292	623846	.	predicted hydrolases of HD superfamily	P76514	yfdR,b2361,JW2358	555	548	608	102	110	21.4583	21.1098	25.1344	20.0985	21.2841	22.6164	38.6637	38.0357	45.2872	36.2135	38.3497	40.7503	0.0854365	578.048	106.227	546.347	609.748	91.8638	120.591	0.0619919	4.99437	0.251813	0.624245	0.684264
GL4_0603	CDS	623939	624214	.	hypothetical protein	A7HUR5	Plav_2034	276	137	151	22	46	5.36459	5.24273	5.42114	8.40482	5.30366	6.91298	19.4369	18.9954	19.6418	30.4523	19.2161	25.047	0.365611	144.017	33.8872	136.119	151.915	29.3051	38.4692	0.418075	3.08065	3.65582	0.0783076	0.115093
GL4_0604	CDS	624211	624516	.	hypothetical protein	NA	NA	306	126	141	16	28	4.93385	4.89553	3.94265	5.11598	4.91469	4.52931	16.1237	15.9985	12.8845	16.7189	16.0611	14.8017	-0.110631	133.497	21.9682	126.176	140.818	18.9978	24.9387	-0.0971084	2.879	0.184811	0.682651	0.735451
GL4_0605	CDS	624522	625112	.	phage protein	NA	NA	591	327	346	42	73	12.8045	12.0131	10.3495	13.3381	12.4088	11.8438	21.6659	20.3268	17.5118	22.5687	20.9963	20.0402	-0.0641127	336.747	57.3469	318.279	355.214	49.5928	65.1011	-0.0477995	4.1984	0.0845425	0.775849	0.815021
GL4_0606	CDS	625552	626847	.	phage protein	Q9T1P7	51	1296	769	770	105	184	30.1122	26.7344	25.8736	33.6193	28.4233	29.7465	23.2347	20.6284	19.9642	25.9408	21.9316	22.9525	0.0628429	770.57	144.118	728.312	812.829	124.631	163.605	0.0873512	5.4145	0.486555	0.497831	0.569708
GL4_0607	CDS	626844	627062	.	hypothetical protein	NA	NA	219	90	119	23	25	3.52418	4.13169	5.66756	4.56784	3.82793	5.1177	16.0921	18.8662	25.8793	20.8577	17.4791	23.3685	0.399118	104.361	24.0261	98.6375	110.084	20.7774	27.2748	0.386456	2.61906	2.73189	0.122446	0.169772
GL4_0608	CDS	627059	627274	.	hypothetical protein	NA	NA	216	95	122	13	18	3.71997	4.23585	3.2034	3.28884	3.97791	3.24612	17.2221	19.6104	14.8306	15.2261	18.4162	15.0283	-0.276638	108.377	15.4969	102.433	114.32	13.4015	17.5923	-0.299304	2.55871	1.38523	0.264249	0.332081
GL4_0609	CDS	627274	627477	.	hypothetical protein	NA	NA	204	106	129	17	23	4.1507	4.47889	4.18907	4.20241	4.31479	4.19574	20.3466	21.9553	20.5346	20.6001	21.151	20.5673	-0.0385201	117.413	19.9971	110.974	123.852	17.2932	22.701	-0.0475915	2.70689	0.04289	0.843437	0.872802
GL4_0610	CDS	627474	627662	.	hypothetical protein	NA	NA	189	66	92	10	30	2.5844	3.19425	2.46416	5.48141	2.88932	3.97278	13.6741	16.9008	13.0379	29.0021	15.2874	21.02	0.435057	78.8876	19.9284	74.5614	83.2139	17.2338	22.623	0.519893	2.25591	2.7945	0.118621	0.164811
GL4_0611	CDS	627761	628258	.	hypothetical protein	NA	NA	498	1183	1507	233	284	46.3234	52.3231	57.4148	51.8906	49.3233	54.6527	93.0189	105.067	115.291	104.198	99.0427	109.744	0.146619	1342.61	258.703	1268.98	1416.24	223.722	293.683	0.130355	6.22861	1.97926	0.183069	0.241074
GL4_0612	CDS	628345	629625	.	superfamily II DNA/RNA helicases, SNF2 family	Q8MNV7	smrc-1,C16A3.1	1281	1913	2195	287	410	74.9084	76.2105	70.7213	74.9126	75.5595	72.8169	58.4765	59.493	55.2079	58.4797	58.9848	56.8438	-0.0524333	2053.09	348.123	1940.5	2165.68	301.052	395.195	-0.0540732	6.78639	0.649757	0.434788	0.508219
GL4_0613	CDS	630118	630579	.	hypothetical protein	NA	NA	462	1284	1494	196	300	50.2783	51.8718	48.2975	54.8141	51.075	51.5558	108.827	112.277	104.54	118.645	110.552	111.593	0.0133948	1388.21	247.62	1312.08	1464.34	214.138	281.102	0.01902	6.24458	0.0522228	0.822817	0.855401
GL4_0614	CDS	631348	631503	.	hypothetical protein	NA	NA	156	156	185	36	50	6.10858	6.42321	8.87096	9.13568	6.2659	9.00332	39.1576	41.1744	56.8651	58.562	40.166	57.7136	0.512241	170.392	42.9783	161.047	179.736	37.1669	48.7896	0.518327	3.34228	8.38605	0.0125759	0.0231299
GL4_0615	CDS	631571	631882	.	hypothetical protein	NA	NA	312	226	256	36	61	8.84961	8.88834	8.87096	11.1455	8.86897	10.0082	28.3641	28.4883	28.4326	35.7228	28.4262	32.0777	0.168758	240.956	48.3846	227.741	254.17	41.8423	54.927	0.189742	3.7668	1.17693	0.297814	0.368011
GL4_0616	CDS	631895	632359	.	putative bacteriophage-related protein	A4XJS1	ruvC,Csac_1564	465	382	374	61	91	14.9582	12.9853	15.0314	16.6269	13.9717	15.8291	32.1681	27.9254	32.3255	35.7568	30.0468	34.0412	0.174608	378.698	75.8881	357.93	399.466	65.6269	86.1493	0.186845	4.41351	1.54658	0.235737	0.300908
GL4_0617	CDS	632527	633030	.	hypothetical protein	O64246	55	504	590	583	69	119	23.103	20.2418	17.0027	21.7429	21.6724	19.3728	45.8392	40.1623	33.7355	43.1407	43.0007	38.4381	-0.157939	587.525	93.7515	555.305	619.746	81.0749	106.428	-0.141638	4.97456	0.986308	0.338885	0.411007
GL4_0618	CDS	633027	633242	.	hypothetical protein	NA	NA	216	123	136	17	23	4.81638	4.72193	4.18907	4.20241	4.76915	4.19574	22.2981	21.8608	19.3938	19.4556	22.0794	19.4247	-0.176291	129.511	19.9971	122.409	136.613	17.2932	22.7011	-0.188831	2.8224	0.711379	0.433727	0.507513
GL4_0619	CDS	633414	633872	.	DNA primase/helicase, phage-associated	NA	NA	459	222	229	48	75	8.69298	7.95089	11.828	13.7035	8.32194	12.7657	18.9389	17.3222	25.769	29.8552	18.1306	27.8121	0.590792	225.713	61.3772	213.335	238.091	53.078	69.6763	0.62685	3.77233	14.4964	0.00219987	0.00502288
GL4_0620	CDS	633859	634632	.	putative regulatory prophage protein	NA	NA	774	339	401	60	95	13.2744	13.9227	14.7849	17.3578	13.5986	16.0714	17.1504	17.988	19.102	22.4261	17.5692	20.764	0.229033	369.701	77.3302	349.426	389.975	66.874	87.7864	0.248661	4.39376	2.90445	0.112253	0.157608
GL4_0621	CDS	634629	635315	.	DNA helicase, phage-associated	NA	NA	687	820	874	147	209	32.1092	30.3453	36.2231	38.1871	31.2273	37.2051	46.7383	44.1708	52.7265	55.5853	45.4545	54.1559	0.247696	847.482	177.862	801.005	893.958	153.812	201.911	0.253562	5.59607	7.4399	0.0173419	0.0306104
GL4_0622	CDS	635445	635906	.	hypothetical protein	NA	NA	462	619	660	132	153	24.2385	22.9152	32.5269	27.9552	23.5769	30.241	52.4643	49.6001	70.4045	60.509	51.0322	65.4567	0.353011	639.877	142.697	604.785	674.968	123.402	161.992	0.341106	5.2109	10.0367	0.00746072	0.0145585
GL4_0623	CDS	635903	636142	.	hypothetical protein	NA	NA	240	1491	1735	207	275	58.3839	60.2393	51.008	50.2462	59.3116	50.6271	243.266	250.997	212.533	209.359	247.132	210.946	-0.227407	1612.02	240.972	1523.62	1700.42	208.389	273.555	-0.23585	6.39135	9.99798	0.00754877	0.0147044
GL4_0624	CDS	637299	637520	.	hypothetical protein	NA	NA	222	87	96	22	31	3.40671	3.33313	5.42114	5.66412	3.36992	5.54263	15.3455	15.0141	24.4196	25.5141	15.1798	24.9668	0.682475	91.5075	26.4883	86.4892	96.5258	22.9067	30.07	0.716203	2.50607	11.0064	0.00559959	0.0112771
GL4_0625	CDS	637538	638047	.	antirestriction protein ArdA	NA	NA	510	286	314	38	63	11.1991	10.9021	9.36379	11.511	11.0506	10.4374	21.9589	21.3767	18.3604	22.5705	21.6678	20.4654	-0.078629	300.065	50.3946	283.61	316.521	43.5805	57.2087	-0.0678432	4.03051	0.165803	0.690535	0.742744
GL4_0626	CDS	638081	638515	.	hypothetical protein	NA	NA	435	447	469	70	111	17.5034	16.2837	17.2491	20.2812	16.8936	18.7651	40.2378	37.4338	39.6531	46.6235	38.8358	43.1383	0.147965	458.42	90.2886	433.28	483.56	78.0802	102.497	0.161922	4.68342	1.38782	0.26002	0.327509
GL4_0627	CDS	638908	639093	.	hypothetical protein	NA	NA	186	204	204	28	43	7.98814	7.08289	6.89964	7.85668	7.53552	7.37816	42.947	38.0801	37.0948	42.2402	40.5135	39.6675	-0.0297044	204.26	35.4587	193.058	215.462	30.6641	40.2533	-0.0201285	3.49141	0.0110253	0.928471	0.942142
GL4_0628	CDS	639318	639638	.	hypothetical protein	NA	NA	321	614	691	65	129	24.0427	23.9916	16.017	23.57	24.0172	19.7935	74.8995	74.7401	49.8972	73.4269	74.8198	61.6621	-0.274981	652.424	96.6592	616.645	688.203	83.5894	109.729	-0.248697	5.10308	2.95891	0.109254	0.153983
GL4_0629	CDS	639635	639799	.	hypothetical protein	NA	NA	165	432	516	46	71	16.9161	17.9156	11.3351	12.9727	17.4158	12.1539	102.522	108.579	68.6977	78.6222	105.55	73.6599	-0.513129	473.512	58.4171	447.544	499.48	50.5182	66.3159	-0.512617	4.605	11.7185	0.00457341	0.00944998
GL4_0630	CDS	640151	643939	.	hypothetical protein	NA	NA	3789	3471	3794	433	663	135.916	131.728	106.698	121.139	133.822	113.919	35.8712	34.7659	28.1599	31.9713	35.3185	30.0656	-0.225388	3634.11	546.1	3434.81	3833.4	472.259	619.94	-0.228304	7.54867	11.3101	0.00513221	0.0104624
GL4_0631	CDS	643945	644625	.	hypothetical protein	P40784	ycdD,STM0927	681	742	774	121	184	29.0549	26.8733	29.8163	33.6193	27.9641	31.7178	42.6651	39.4616	43.7831	49.3675	41.0633	46.5753	0.177651	758.65	152.283	717.045	800.255	131.692	172.873	0.189314	5.41787	3.23051	0.0956818	0.137118
GL4_0632	CDS	644662	644946	.	hypothetical protein	NA	NA	285	686	855	111	152	26.8621	29.6857	27.3521	27.7725	28.2739	27.5623	94.2529	104.16	95.9724	97.4472	99.2066	96.7098	-0.0364015	769.399	131.451	727.204	811.593	113.677	149.225	-0.0431501	5.38121	0.151797	0.703171	0.753172
GL4_0633	CDS	645086	646240	.	hypothetical protein	NA	NA	1155	1592	1632	270	349	62.3388	56.6631	66.5322	63.767	59.501	65.1496	53.973	49.059	57.6037	55.2095	51.516	56.4066	0.128459	1613.99	309.556	1525.48	1702.5	267.7	351.413	0.123676	6.49439	2.65589	0.127296	0.175328
GL4_0634	CDS	646272	647933	.	terminase, large subunit, putative	Q9P9T5	XF_1569,XF_1674	1662	1004	1159	136	268	39.3142	40.2406	33.5125	48.9672	39.7774	41.2399	23.6547	24.2121	20.164	29.4628	23.9334	24.8134	0.0500388	1081.03	201.267	1021.75	1140.32	174.053	228.481	0.0808008	5.90053	0.434654	0.521294	0.591475
GL4_0635	CDS	647933	649975	.	hypothetical protein	NA	NA	2043	1690	1803	225	330	66.1763	62.6003	55.4435	60.2955	64.3883	57.8695	32.3917	30.6413	27.1383	29.5132	31.5165	28.3257	-0.149006	1747.68	277.173	1651.84	1843.53	239.695	314.651	-0.150519	6.52864	3.97667	0.067681	0.101445
GL4_0636	CDS	650166	651080	.	hypothetical protein	NA	NA	915	2819	3048	202	331	110.385	105.827	49.776	60.4782	108.106	55.1271	120.64	115.658	54.4	66.0964	118.149	60.2482	-0.960023	2935.25	265.858	2774.28	3096.22	229.91	301.807	-0.958609	7.06901	139.026	2.75561e-08	2.61351e-07
GL4_0637	CDS	651099	652142	.	hypothetical protein	NA	NA	1044	1701	1754	159	240	66.607	60.899	39.1801	43.8513	63.753	41.5157	63.7998	58.3324	37.5288	42.0031	61.0661	39.766	-0.60644	1729.56	199.274	1634.71	1824.41	172.329	226.219	-0.611436	6.40604	47.8093	1.09799e-05	4.76557e-05
GL4_0638	CDS	652170	653081	.	hypothetical protein	NA	NA	912	2014	2285	285	389	78.8633	79.3353	70.2285	71.0756	79.0993	70.652	86.4729	86.9905	77.0049	77.9337	86.7317	77.4693	-0.16097	2148.92	336.834	2031.07	2266.77	291.289	382.379	-0.167436	6.81883	6.74549	0.022215	0.0378861
GL4_0639	CDS	653136	653960	.	hypothetical protein	NA	NA	825	662	706	96	143	25.9223	24.5124	23.6559	26.128	25.2173	24.892	31.421	29.712	28.6738	31.6703	30.5665	30.1721	-0.0181381	684.413	119.36	646.879	721.946	103.221	135.499	-0.0134995	5.22019	0.0147686	0.905144	0.922322
GL4_0640	CDS	653976	654413	.	hypothetical protein	NA	NA	438	388	461	51	65	15.1931	16.0059	12.5672	11.8764	15.5995	12.2218	34.6875	36.5433	28.6922	27.115	35.6154	27.9036	-0.3412	424.11	58.0157	400.851	447.368	50.1711	65.8603	-0.363668	4.47213	6.04716	0.0288211	0.0479488
GL4_0641	CDS	654420	655127	.	hypothetical protein	NA	NA	708	448	443	90	113	17.5426	15.381	22.1774	20.6466	16.4618	21.412	24.7777	21.7246	31.324	29.1619	23.2511	30.243	0.365481	446.29	101.562	421.815	470.764	87.8296	115.295	0.370277	4.69396	7.67027	0.0160106	0.0285327
GL4_0642	CDS	655373	657214	.	hypothetical protein	NA	NA	1842	1457	1592	266	395	57.0526	55.2743	65.5466	72.1719	56.1634	68.8592	30.9732	30.0078	35.5845	39.1812	30.4905	37.3828	0.285546	1524.96	329.996	1441.33	1608.59	285.376	374.617	0.297764	6.46763	16.4218	0.00138718	0.00337815
GL4_0643	CDS	657701	658345	.	hypothetical protein	NA	NA	645	2702	3197	287	392	105.804	111	70.7213	71.6237	108.402	71.1725	164.037	172.093	109.645	111.045	168.065	110.345	-0.602541	2946.24	339.316	2784.66	3107.81	293.435	385.196	-0.612071	7.14818	84.0355	5.13523e-07	3.29387e-06
GL4_0644	CDS	658345	659037	.	hypothetical protein	NA	NA	693	1065	1085	78	136	41.7028	37.6713	19.2204	24.849	39.687	22.0347	60.1772	54.3597	27.7351	35.8572	57.2684	31.7961	-0.829188	1076.31	106.83	1017.29	1135.34	92.385	121.275	-0.826439	5.70808	46.1061	1.32382e-05	5.60688e-05
GL4_0645	CDS	659038	660426	.	hypothetical protein	NA	NA	1389	1562	1838	158	206	61.1641	63.8155	38.9337	37.639	62.4898	38.2863	44.0346	45.9435	28.03	27.0979	44.989	27.564	-0.687095	1698.66	182.009	1605.5	1791.81	157.399	206.62	-0.716145	6.36047	77.8551	7.89359e-07	4.83047e-06
GL4_0646	CDS	660426	663314	.	hypothetical protein	NA	NA	2889	4146	4471	410	561	162.347	155.233	101.03	102.502	158.79	101.766	56.195	53.7326	34.9707	35.4802	54.9638	35.2255	-0.627489	4311.8	485.06	4075.34	4548.26	419.472	550.647	-0.645968	7.67056	114.894	8.48525e-08	6.87285e-07
GL4_0647	CDS	663413	663889	3.2.1.17	lysozyme	O80288	19	477	380	449	52	122	14.8799	15.5893	12.8136	22.2911	15.2346	17.5523	31.1947	32.682	26.8629	46.7318	31.9383	36.7973	0.198517	414.161	86.409	391.448	436.873	74.7252	98.0928	0.244991	4.55738	1.72533	0.21186	0.273577
GL4_0648	CDS	663886	664335	.	hypothetical protein	NA	NA	450	205	225	17	46	8.0273	7.81201	4.18907	8.40482	7.91966	6.29694	17.8384	17.36	9.30904	18.6774	17.5992	13.9932	-0.310934	215.043	31.3601	203.25	226.836	27.1197	35.6004	-0.271288	3.52482	1.2918	0.276361	0.345477
GL4_0649	CDS	664379	664612	.	hypothetical protein	NA	NA	234	113	132	13	23	4.4248	4.58305	3.2034	4.20241	4.50393	3.70291	18.9094	19.5857	13.6898	17.959	19.2475	15.8244	-0.267193	122.451	17.9773	115.735	129.166	15.5465	20.4081	-0.261412	2.73399	1.17579	0.300617	0.371199
GL4_0650	CDS	664617	665192	.	hypothetical protein	NA	NA	576	471	536	64	122	18.4432	18.61	15.7706	22.2911	18.5266	19.0308	32.0195	32.3089	27.3795	38.6997	32.1642	33.0396	0.0375885	503.355	92.6039	475.751	530.959	80.0825	105.125	0.0635879	4.79664	0.179122	0.67909	0.732152
GL4_0651	CDS	665236	665640	.	hypothetical protein	NA	NA	405	321	383	61	95	12.5696	13.2978	15.0314	17.3578	12.9337	16.1946	31.036	32.834	37.1145	42.8587	31.935	39.9866	0.31553	351.678	77.8409	332.392	370.965	67.3156	88.3662	0.330212	4.34057	5.10445	0.0418046	0.0662386
GL4_0652	CDS	665779	666258	.	hypothetical protein	NA	NA	480	6580	7226	476	622	257.657	250.887	117.294	113.648	254.272	115.471	536.785	522.682	244.362	236.766	529.733	240.564	-1.13558	6905.76	549.071	6527.04	7284.47	474.828	623.314	-1.14663	8.20341	367.075	7.22385e-11	1.49368e-09
GL4_0653	CDS	666421	667497	.	integrase	Q8NNZ9	xerC,Cgl2028,cg2224	1077	8210	9338	735	990	321.484	324.216	181.115	180.886	322.85	181.001	298.499	301.036	168.167	167.954	299.768	168.06	-0.831111	8769.77	861.661	8288.83	9250.71	745.151	978.171	-0.841271	8.60718	208.072	2.42134e-09	3.11221e-08
GL4_0654	CDS	667921	668235	.	cytochrome c class I	P20958	fccA	315	2595	3081	343	373	101.614	106.973	84.5206	68.1522	104.293	76.3364	322.584	339.595	268.319	216.356	331.089	242.338	-0.448612	2834.72	358.973	2679.26	2990.18	310.434	407.512	-0.475169	7.12874	36.58	4.22332e-05	0.00015484
GL4_0655	CDS	668279	669565	.	sulfide dehydrogenase [flavocytochrome C] flavoprotein chain precursor	Q06530	fccB,Alvin_1092	1287	2912	3174	336	410	114.027	110.201	82.7957	74.9126	112.114	78.8541	88.5989	85.6266	64.3323	58.2071	87.1128	61.2697	-0.500821	3044.39	373.41	2877.43	3211.34	322.92	423.901	-0.521227	7.21683	67.9769	1.67586e-06	9.20337e-06
GL4_0656	CDS	669810	670952	.	nucleoside permease NupC	O25792	nupC,HP_1180	1143	1070	1191	147	205	41.8986	41.3516	36.2231	37.4563	41.6251	36.8397	36.6567	36.1781	31.6913	32.7701	36.4174	32.2307	-0.171193	1130.54	175.912	1068.54	1192.54	152.126	199.698	-0.178	5.90046	4.35852	0.057203	0.0878767
GL4_0657	CDS	670941	672416	.	beta-lactamase class C and other penicillin binding proteins	NA	NA	1476	1978	1953	266	375	77.4536	67.8083	65.5466	68.5176	72.631	67.0321	52.4754	45.9406	44.4082	46.4211	49.208	45.4147	-0.113335	1969.28	320.23	1861.28	2077.28	276.93	363.53	-0.114429	6.7097	1.87293	0.194469	0.254077
GL4_0658	CDS	672435	672899	1.11.1.15	thiol peroxidase, Bcp-type	Q83CY8	bcp,CBU_0963	465	2130	2489	359	423	83.4056	86.4182	88.4632	77.2878	84.9119	82.8755	179.367	185.846	190.243	166.21	182.606	178.227	-0.0348279	2307.68	391.628	2181.13	2434.24	338.674	444.581	-0.0528377	6.95534	0.596623	0.45377	0.527685
GL4_0659	CDS	672955	673899	.	Ava_C0101 and related proteins	NA	NA	945	1226	1308	170	254	48.0072	45.4138	41.8907	46.4092	46.7105	44.1499	50.8012	48.057	44.3287	49.1103	49.4291	46.7195	-0.0796769	1267.77	211.751	1198.24	1337.29	183.119	240.383	-0.0757895	6.08922	0.784491	0.39196	0.465514
GL4_0660	CDS	673908	674357	.	acetyltransferase, GNAT family	Q6GI30	SAR1027	450	519	600	88	111	20.3228	20.832	21.6846	20.2812	20.5774	20.9829	45.1617	46.2934	48.1879	45.0693	45.7276	46.6286	0.0275556	559.218	99.5433	528.55	589.886	86.0835	113.003	0.0160262	4.93688	0.018002	0.895335	0.915127
GL4_0661	CDS	674363	675466	.	poly (3-hydroxybutyrate) depolymerase	NA	NA	1104	1814	2025	313	367	71.0318	70.3081	77.1281	67.0559	70.67	72.092	64.3404	63.6849	69.8624	60.739	64.0127	65.3007	0.0283038	1919.49	340.483	1814.23	2024.76	294.445	386.521	0.0109757	6.71021	0.0251162	0.876528	0.899773
GL4_0662	CDS	675491	675850	.	hypothetical protein	NA	NA	360	532	643	144	190	20.8318	22.325	35.4839	34.7156	21.5784	35.0997	57.8662	62.0139	98.5663	96.4321	59.94	97.4992	0.692722	586.917	166.989	554.73	619.104	144.41	189.569	0.692444	5.18962	44.5501	1.57819e-05	6.52647e-05
GL4_0663	CDS	675823	676221	4.1.1.50	S-adenosylmethionine decarboxylase proenzyme, prokaryotic class 1B	B9KXN0	speH,trd_0217	399	1643	1878	506	608	64.3359	65.2043	124.686	111.09	64.7701	117.888	161.243	163.419	312.497	278.421	162.331	295.459	0.860033	1759.86	557.943	1663.35	1856.37	482.501	633.386	0.848701	6.90694	184.161	5.08964e-09	5.94506e-08
GL4_0664	CDS	676299	677024	2.5.1.16	spermidine synthase	Q9X6R0	speE1,speE,PA1687	726	1319	1426	293	357	51.6488	49.5108	72.1998	65.2287	50.5798	68.7143	71.1416	68.1967	99.4487	89.8467	69.6692	94.6477	0.43665	1373.09	325.304	1297.79	1448.39	281.318	369.29	0.428424	6.3594	35.5398	4.85976e-05	0.00017483
GL4_0665	CDS	677050	678300	2.7.1.11	6-phosphofructokinase	Q2RNU4	pfp,Rru_A3407	1251	3007	3343	566	721	117.747	116.069	139.471	131.736	116.908	135.604	94.1221	92.7811	111.488	105.305	93.4516	108.396	0.211918	3175.25	643.985	3001.12	3349.38	556.908	731.061	0.204261	7.50692	13.3753	0.00292548	0.00639036
GL4_0666	CDS	678406	679425	.	hypothetical protein	P9WN47	egtD,Rv3701c	1020	1330	1437	325	448	52.0795	49.8927	80.0851	81.8557	50.9861	80.9704	51.0584	48.9144	78.5148	80.2507	49.9864	79.3827	0.656773	1384.1	386.233	1308.2	1460.01	334.009	438.458	0.664557	6.4613	97.067	2.25658e-07	1.65466e-06
GL4_0667	CDS	679425	680636	.	hypothetical protein	G7CFI3	egtB,KEK_08772	1212	1646	1811	376	431	64.4533	62.878	92.6523	78.7495	63.6657	85.7009	53.1793	51.8796	76.4458	64.9749	52.5294	70.7103	0.421848	1728.86	404.292	1634.05	1823.68	349.625	458.958	0.409647	6.69325	33.7297	6.25137e-05	0.000220039
GL4_0668	CDS	680795	681322	.	transcription elongation factor	NA	NA	528	1369	1512	194	256	53.6067	52.4967	47.8046	46.7747	53.0517	47.2897	101.528	99.4256	90.5391	88.5884	100.477	89.5637	-0.164144	1440.71	224.989	1361.7	1519.72	194.567	255.411	-0.172779	6.24749	5.26547	0.0391605	0.0627058
GL4_0669	CDS	681335	681910	.	Dna binding response regulator PrrA	P0C5S3	actR,R00065,SMc02584	576	7449	8242	1273	1568	291.685	286.163	313.687	286.495	288.924	300.091	506.397	496.81	544.596	497.387	501.604	520.991	0.0546046	7847.22	1424.71	7416.87	8277.56	1232.07	1617.35	0.0445311	8.75462	0.589021	0.456597	0.530545
GL4_0670	CDS	682152	683597	.	sensor histidine kinase PrrB	Q3J6C1	regB,prrB,RHOS4_00950,RSP_1520	1446	3863	4201	435	595	151.266	145.859	107.191	108.715	148.562	107.953	104.61	100.871	74.1292	75.183	102.74	74.6561	-0.455447	4034.29	514.525	3813.05	4255.53	444.953	584.096	-0.464926	7.62621	61.9963	2.77015e-06	1.42093e-05
GL4_0671	CDS	683641	684528	.	hypothetical protein	P42332	bcrA	888	1575	1765	393	436	61.6731	61.2809	96.8413	79.6631	61.477	88.2522	69.4517	69.01	109.056	89.7107	69.2309	99.3831	0.515339	1669.9	415.534	1578.32	1761.48	359.348	471.721	0.499271	6.67622	45.0184	1.49612e-05	6.25703e-05
GL4_0672	CDS	684525	685379	.	ABC-type multidrug transport system, permease component	NA	NA	855	1490	1805	305	406	58.3448	62.6697	75.1568	74.1817	60.5072	74.6692	68.2395	73.2979	87.9027	86.7622	70.7687	87.3324	0.299589	1645.54	355.435	1555.3	1735.78	307.375	403.495	0.295109	6.57815	16.5787	0.00133796	0.00327148
GL4_0673	CDS	685396	685989	.	cytochrome oxidase biogenesis protein Sco1/SenC/PrrC, putative copper metallochaperone	Q8VYP0	HCC1,SCO1-1,At3g08950,T16O11.9	594	1818	2022	372	520	71.1884	70.204	91.6666	95.011	70.6962	93.3388	119.846	118.188	154.321	159.951	119.017	157.136	0.397926	1920.1	445.557	1814.8	2025.4	385.311	505.803	0.398507	6.84325	41.2465	2.33071e-05	9.09607e-05
GL4_0674	CDS	686093	687364	.	intracellular PHB depolymerase	NA	NA	1272	4321	4806	763	1113	169.2	166.865	188.015	203.36	168.032	195.688	133.019	131.183	147.811	159.874	132.101	153.842	0.218282	4563.86	934.472	4313.58	4814.15	808.118	1060.83	0.218006	8.04177	12.7365	0.00346228	0.00742172
GL4_0675	CDS	687454	688275	.	protein of unknown function DUF45	NA	NA	822	2055	2382	311	447	80.4688	82.7032	76.6353	81.673	81.586	79.1541	97.8939	100.612	93.2302	99.3588	99.253	96.2945	-0.043215	2217.09	378.516	2095.5	2338.68	327.335	429.697	-0.0441907	6.89971	0.437892	0.519772	0.59015
GL4_0676	CDS	688302	690413	2.4.1.129	multimodular transpeptidase-transglycosylase	P70997	pbpG,ywhE,BSU37510	2112	4766	5283	418	538	186.625	183.426	103.002	98.2999	185.026	100.651	88.3641	86.8495	48.7698	46.5435	87.6068	47.6566	-0.86478	5025.29	478.217	4749.7	5300.88	413.555	542.879	-0.887372	7.82417	225.464	1.48151e-09	2.06357e-08
GL4_0677	CDS	690381	690506	.	hypothetical protein	NA	NA	126	147	122	6	10	5.75616	4.23585	1.47849	1.82714	4.996	1.65281	45.6838	33.6178	11.7341	14.5011	39.6508	13.1176	-1.52579	134.875	7.99626	127.479	142.272	6.91504	9.07747	-1.56565	2.74203	21.0883	0.000512971	0.00143987
GL4_0678	CDS	690549	692981	5.99.1.3	DNA gyrase subunit B	P0CAX1	gyrB,CC_0160	2433	20779	23515	1675	2110	813.655	816.442	412.746	385.526	815.049	399.136	334.425	335.57	169.645	158.457	334.997	164.051	-1.02554	22138.8	1896.63	20924.7	23352.9	1640.18	2153.08	-1.039	9.84747	301.856	2.44533e-10	4.30714e-09
GL4_0679	CDS	692991	693110	.	hypothetical protein	NA	NA	120	4	0	0	0	0.15663	0	0	0	0.0783151	0	1.30525	0	0	0	0.652626	0	-0.72476	NA	NA	NA	NA	NA	NA	NA	NA	NA	NA	NA
GL4_0680	CDS	693071	694261	.	DNA recombination and repair protein RecF	Q98BH1	recF,mll5578	1191	1780	1917	250	347	69.7004	66.5584	61.6039	63.4016	68.1294	62.5028	58.5226	55.8844	51.7245	53.2339	57.2035	52.4792	-0.122128	1849.51	298.313	1748.08	1950.94	257.976	338.649	-0.126184	6.61635	3.29152	0.0929213	0.13368
GL4_0681	CDS	694258	695373	2.7.7.7	DNA polymerase III beta subunit	P0CAU5	dnaN,CC_0156	1116	4948	5618	943	1144	193.752	195.057	232.37	209.024	194.404	220.697	173.613	174.783	208.217	187.298	174.198	197.757	0.182025	5280.82	1046.75	4991.21	5570.42	905.211	1188.28	0.171192	8.23446	8.3924	0.0125495	0.0231069
GL4_0682	CDS	695672	697132	.	chromosomal replication initiator protein DnaA	Q6NDV3	dnaA,RPA0001	1461	15112	17312	2196	2540	591.749	601.074	541.129	464.092	596.411	502.611	405.03	411.413	370.382	317.654	408.221	344.018	-0.246209	16200.8	2384.63	15312.3	17089.2	2062.19	2707.06	-0.258177	9.67059	14.7502	0.00206603	0.00474659
GL4_0683	CDS	697250	697573	.	hypothetical protein	Q9ZCV8	RP600	324	7875	9490	1474	1664	308.366	329.493	363.217	304.035	318.93	333.626	951.746	1016.95	1121.04	938.381	984.351	1029.71	0.0649293	8665.49	1580.53	8190.27	9140.71	1366.82	1794.25	0.0511763	8.90067	0.497569	0.493094	0.565259
GL4_0684	CDS	698543	698809	.	SSU ribosomal protein S20p	B8EMX4	rpsT,Msil_3922	267	4681	5105	1002	1250	183.297	177.246	246.908	228.392	180.271	237.65	686.504	663.842	924.751	855.4	675.173	890.076	0.398155	4895.69	1128.32	4627.21	5164.17	975.758	1280.89	0.388703	8.22063	46.776	1.22913e-05	5.24587e-05
GL4_0685	CDS	698925	699740	4.2.1.17	enoyl-CoA hydratase	P9WNN9	echA8,Rv1070c,MTV017.23c	816	2520	2869	895	1039	98.677	99.6119	220.542	189.839	99.1444	205.191	120.928	122.073	270.272	232.646	121.501	251.459	1.04326	2693.43	970.953	2545.72	2841.14	839.666	1102.24	1.03402	7.65687	273.274	4.53073e-10	7.32175e-09
GL4_0686	CDS	699755	700654	3.2.2.23	formamidopyrimidine-DNA glycosylase	B2IE81	mutM,fpg,Bind_0452	900	2826	3059	936	1108	110.659	106.209	230.645	202.447	108.434	216.546	122.955	118.01	256.272	224.941	120.482	240.606	0.991914	2944.37	1025.71	2782.9	3105.84	887.014	1164.4	0.984654	7.76555	264.989	5.48076e-10	8.5259e-09
GL4_0687	CDS	700784	701557	.	ubiquinone/menaquinone biosynthesis methyltransferase UbiE	Q89WD0	ubiE,bll0761	774	2191	2444	462	597	85.7942	84.8558	113.844	109.08	85.325	111.462	110.845	109.633	147.085	140.93	110.239	144.008	0.382467	2317.52	529.66	2190.43	2444.62	458.042	601.277	0.376572	7.11273	43.2349	1.838e-05	7.43464e-05
GL4_0688	CDS	701680	703254	.	ubiquinone biosynthesis monooxygenase UbiB	Q7NZD1	ubiB,CV_0991	1575	3079	3623	619	736	120.566	125.791	152.531	134.477	123.178	143.504	76.5499	79.8672	96.8453	85.3823	78.2085	91.1138	0.217761	3347.29	679.288	3163.73	3530.86	587.438	771.138	0.205135	7.58433	10.5999	0.0063051	0.0125229
GL4_0689	CDS	703315	704541	4.1.1.36	phosphopantothenoylcysteine decarboxylase	Q9KVD1	coaBC,VC_0215	1227	3460	3883	609	667	135.485	134.818	150.067	121.87	135.152	135.969	110.42	109.876	122.304	99.3235	110.148	110.814	0.00861648	3671.06	641.033	3469.74	3872.39	554.355	727.71	-0.0116798	7.637	0.0268808	0.872305	0.897374
GL4_0690	CDS	704550	704999	3.6.1.23	deoxyuridine 5'-triphosphate nucleotidohydrolase	B9J7P6	dut,Arad_0561	450	1079	1134	164	173	42.251	39.3726	40.4122	31.6094	40.8118	36.0108	93.8911	87.4946	89.8048	70.2432	90.6928	80.024	-0.17846	1107.37	168.801	1046.64	1168.1	145.976	191.625	-0.207648	5.86487	4.15259	0.0625911	0.0951442
GL4_0691	CDS	705071	705874	.	sulfur carrier protein adenylyltransferase ThiF	B0W377	CPIJ001621	804	852	927	158	212	33.3622	32.1855	38.9337	38.7353	32.7739	38.8345	41.4953	40.0317	48.425	48.1782	40.7635	48.3016	0.239391	889.778	184.961	840.982	938.574	159.951	209.97	0.239769	5.66306	7.44057	0.0173378	0.0306104
GL4_0692	CDS	706028	707308	.	FAD-dependent monooxygenase	O07561	yhjG,BSU10500	1281	3181	3603	509	585	124.56	125.096	125.426	106.887	124.828	116.156	97.2367	97.6553	97.9122	83.4406	97.446	90.6764	-0.102781	3390.96	548.638	3205	3576.92	474.454	622.822	-0.121713	7.48519	3.47823	0.085054	0.123752
GL4_0693	CDS	707315	708307	1.1.1.79	glyoxylate reductase	B6YWH0	gyaR,TON_0945	993	7637	8313	1047	1343	299.046	288.628	257.997	245.384	293.837	251.691	301.154	290.663	259.816	247.114	295.908	253.465	-0.222551	7980.05	1196.2	7542.42	8417.68	1034.46	1357.95	-0.231884	8.6687	16.6638	0.00131212	0.0032189
GL4_0694	CDS	708525	709106	.	hypothetical protein	NA	NA	582	2853	3247	534	662	111.717	112.736	131.586	120.956	112.226	126.271	191.953	193.705	226.093	207.829	192.829	216.961	0.169287	3048.81	598.796	2881.61	3216	517.83	679.763	0.15793	7.43001	7.43003	0.0174017	0.0306997
GL4_0695	CDS	709156	709602	.	iron-responsive regulator Irr	Q8CNQ7	perR,SE_1545	447	8879	9855	1270	1546	347.68	342.166	312.948	282.475	344.923	297.712	777.807	765.473	700.107	631.935	771.64	666.021	-0.212064	9368.33	1412.99	8854.56	9882.09	1221.93	1604.05	-0.222989	8.90112	14.0385	0.00246761	0.00553716
GL4_0696	CDS	709794	710369	4.2.1.60	3-hydroxydecanoyl-[acyl-carrier-protein] dehydratase	Q11BB9	fabA,Meso_3939	576	7100	7867	1197	1488	278.019	273.143	294.96	271.878	275.581	283.419	482.671	474.206	512.082	472.01	478.439	492.046	0.0403766	7484.86	1345.82	7074.39	7895.33	1163.85	1527.8	0.0305571	8.68045	0.284042	0.603112	0.667252
GL4_0697	CDS	710409	711629	2.3.1.41	3-oxoacyl-[acyl-carrier-protein] synthase, KASI	Q02K94	fabB,PA14_43690	1221	5945	6720	960	1168	232.792	233.319	236.559	213.409	233.055	224.984	190.657	191.088	193.742	174.782	190.872	184.262	-0.0505785	6330.51	1067.29	5983.34	6677.68	922.974	1211.6	-0.0623244	8.40156	1.10953	0.311489	0.383061
GL4_0698	CDS	711676	712560	1.3.1.9	enoyl-[acyl-carrier-protein] reductase [NADH]	P58381	fabI2,R00246,SMc00326	885	7779	8579	1335	1662	304.607	297.863	328.965	303.67	301.235	316.317	344.188	336.569	371.712	343.13	340.379	357.421	0.0702819	8181.48	1502.27	7732.8	8630.16	1299.14	1705.4	0.0608314	8.82191	1.12397	0.308485	0.379788
GL4_0699	CDS	712607	712819	.	hypothetical protein	NA	NA	213	2289	2548	323	428	89.6316	88.4667	79.5923	78.2014	89.0492	78.8968	420.806	415.337	373.673	367.143	418.071	370.408	-0.174192	2418.61	375.449	2285.97	2551.25	324.683	426.216	-0.181424	6.98358	8.73611	0.0112142	0.0209731
GL4_0700	CDS	712901	715021	2.7.7.8	polyribonucleotide nucleotidyltransferase	Q11BC3	pnp,Meso_3935	2121	58756	67635	11329	12945	2300.74	2348.29	2791.64	2365.23	2324.52	2578.43	1084.74	1107.16	1316.19	1115.15	1095.95	1215.67	0.149435	63142.3	12247.3	59679.6	66605.1	10591.3	13903.3	0.1399	11.8135	3.91627	0.0695421	0.103891
GL4_0701	CDS	715138	715407	.	SSU ribosomal protein S15p	B8EP10	rpsO,Msil_0269	270	16826	20304	2827	3284	658.865	704.956	696.617	600.031	681.911	648.324	2440.24	2610.95	2580.06	2222.34	2525.59	2401.2	-0.0728377	18526.4	3077.2	17510.4	19542.4	2661.12	3493.28	-0.0838472	9.93692	1.42869	0.253461	0.320582
GL4_0702	CDS	715570	716490	4.2.1.70	tRNA pseudouridine synthase B	Q89WB1	truB,bll0781	921	2687	3007	361	458	105.216	104.403	88.956	83.6828	104.81	86.3194	114.241	113.359	96.5864	90.8608	113.8	93.7236	-0.277327	2846.85	409.724	2690.73	3002.98	354.323	465.125	-0.290573	7.184	23.5223	0.00032289	0.00094872
GL4_0703	CDS	716515	716928	.	ribosome-binding factor A	B1ZDQ7	rbfA,Mpop_2818	414	2567	2899	360	474	100.517	100.653	88.7096	86.6062	100.585	87.6579	242.796	243.124	214.274	209.194	242.96	211.734	-0.197593	2732.4	416.98	2582.55	2882.25	360.598	473.362	-0.206055	7.1501	11.984	0.004248	0.00887177
GL4_0704	CDS	716993	719503	.	translation initiation factor 2	B8EIA7	infB,Msil_2295	2511	38039	42203	5162	6083	1489.51	1465.29	1272	1111.45	1477.4	1191.72	593.196	583.549	506.57	442.631	588.372	474.601	-0.309429	40127.4	5660.41	37926.8	42328	4895.04	6425.78	-0.319561	10.9458	24.0538	0.000293111	0.000871221
GL4_0705	CDS	719500	720060	.	predicted nucleic-acid-binding protein	NA	NA	561	4416	4659	662	885	172.92	161.761	163.127	161.701	167.34	162.414	308.235	288.344	290.779	288.238	298.289	289.509	-0.0429596	4543.39	773.053	4294.23	4792.55	668.524	877.581	-0.0490814	7.92971	0.698767	0.418392	0.492687
GL4_0706	CDS	720208	721872	.	transcription termination protein NusA	Q92HF4	nusA,RC0817	1665	25744	28680	3017	3599	1008.07	995.771	743.436	657.586	1001.92	700.511	605.449	598.061	446.508	394.947	601.755	420.727	-0.515261	27213.3	3326.63	25720.9	28705.7	2876.82	3776.44	-0.526129	10.3076	68.8897	1.55731e-06	8.64045e-06
GL4_0707	CDS	721934	722491	.	clustered with transcription termination protein NusA	A6WWW8	rimP,Oant_0750	558	6729	7815	991	1235	263.491	271.337	244.198	225.651	267.414	234.925	472.206	486.268	437.631	404.393	479.237	421.012	-0.186463	7264.74	1115.43	6866.34	7663.15	964.605	1266.25	-0.197261	8.54747	11.2299	0.00525104	0.0106655
GL4_0708	CDS	722709	723149	.	hypothetical protein	NA	NA	441	401	472	98	111	15.7022	16.3879	24.1487	20.2812	16.045	22.215	35.6058	37.1607	54.759	45.9891	36.3833	50.3741	0.458648	436.164	104.72	412.245	460.084	90.5602	118.88	0.447526	4.68105	11.6896	0.00461052	0.00950955
GL4_0709	CDS	723177	723905	2.1.1.33	tRNA (guanine46-N7-)-methyltransferase	Q2RMS4	trmB,Rru_A3777	729	888	1008	143	186	34.7719	34.9978	35.2374	33.9847	34.8849	34.6111	47.6981	48.008	48.3367	46.6183	47.853	47.4775	-0.0111338	947.797	164.513	895.82	999.775	142.268	186.758	-0.0203256	5.68592	0.0518603	0.823422	0.855547
GL4_0710	CDS	723987	725162	2.5.1.6	S-adenosylmethionine synthetase	A7HZ88	metK,Plav_3623	1176	12126	13348	2778	3397	474.825	463.443	684.543	620.678	469.134	652.61	403.762	394.085	582.094	527.787	398.923	554.941	0.475207	12741.6	3100.15	12042.9	13440.4	2680.97	3519.34	0.466903	9.6639	60.3297	3.20988e-06	1.60446e-05
GL4_0711	CDS	725272	725688	.	transcriptional regulator	P0C5S2	R00410,SMc01110	417	1702	1813	327	409	66.6462	62.9475	80.5779	74.7298	64.7968	77.6539	159.823	150.953	193.232	179.208	155.388	186.22	0.259607	1758.72	368.239	1662.28	1855.17	318.447	418.03	0.250202	6.66088	13.8549	0.00258547	0.00577654
GL4_0712	CDS	725783	727417	.	apolipoprotein N-acyltransferase	Q89WA1	lnt,bll0791	1635	2037	2164	274	351	79.7639	75.1342	67.5179	64.1325	77.4491	65.8252	48.7853	45.9536	41.2953	39.2247	47.3695	40.26	-0.229351	2102.17	312.59	1986.89	2217.46	270.323	354.856	-0.243466	6.76704	12.7659	0.00343515	0.00737781
GL4_0713	CDS	727426	728406	.	magnesium and cobalt efflux protein CorC	Q4UK99	tlyC,RF_1185	981	4179	4665	541	682	163.639	161.969	133.311	124.611	162.804	128.961	166.809	165.106	135.893	127.024	165.957	131.458	-0.33394	4421.98	612.158	4179.47	4664.48	529.385	694.931	-0.346649	7.79075	36.6162	4.20301e-05	0.000154265
GL4_0714	CDS	728406	728933	.	metal-dependent hydrolase YbeY	Q5NRF6	ybeY,ZMO0074	528	2588	2954	361	475	101.34	102.563	88.956	86.7889	101.951	87.8725	191.931	194.248	168.477	164.373	193.09	166.425	-0.213208	2769.84	417.984	2617.94	2921.74	361.466	474.502	-0.222217	7.16466	13.7674	0.00264393	0.00589132
GL4_0715	CDS	729002	729991	.	phosphate starvation-inducible protein PhoH, predicted ATPase	P46343	phoH,yqfE,BSU25340	990	4699	5502	874	954	184.001	191.03	215.367	174.309	187.516	194.838	185.86	192.959	217.543	176.069	189.41	196.806	0.0549799	5094.69	920.192	4815.29	5374.09	795.768	1044.62	0.0370582	8.12765	0.247858	0.626955	0.686557
GL4_0716	CDS	729971	730168	.	hypothetical protein	NA	NA	198	358	348	62	56	14.0184	12.0826	15.2778	10.232	13.0505	12.7549	70.8	61.0231	77.1605	51.6766	65.9116	64.4185	-0.0325572	353.68	59.2197	334.284	373.076	51.2123	67.2271	-0.0722032	4.26258	0.159722	0.695942	0.747352
GL4_0717	CDS	730119	731498	.	tRNA-i(6)A37 methylthiotransferase	Q11BD9	miaB,Meso_3919	1380	6570	7383	1094	1317	257.265	256.338	269.579	240.634	256.802	255.106	186.424	185.752	195.347	174.372	186.088	184.86	-0.0095053	6975.3	1210.03	6592.77	7357.83	1046.41	1373.64	-0.0211674	8.55744	0.124312	0.73009	0.777501
GL4_0718	CDS	731581	733611	2.4.1.129	multimodular transpeptidase-transglycosylase	P76577	pbpC,yfgN,b2519,JW2503	2031	3707	3977	451	553	145.157	138.082	111.133	101.041	141.619	106.087	71.4707	67.987	54.7186	49.7492	69.7289	52.2339	-0.409955	3845.27	502.747	3634.4	4056.15	434.768	570.726	-0.429107	7.56928	48.5922	1.00935e-05	4.42702e-05
GL4_0719	CDS	733671	738887	.	PAN domain protein	Q9PDX7	XF_1252	5217	17398	19078	1925	2483	681.263	662.389	474.35	453.678	671.826	464.014	130.585	126.967	90.9239	86.9614	128.776	88.9427	-0.52895	18246.6	2206.11	17245.9	19247.2	1907.81	2504.4	-0.541996	9.73248	87.0394	4.20836e-07	2.79633e-06
GL4_0720	CDS	739085	740014	.	transcriptional regulator, LysR family	Q9EXL7	nagR	930	2768	3059	270	379	108.388	106.209	66.5322	69.2484	107.298	67.8903	116.546	114.203	71.54	74.4607	115.375	73.0004	-0.653172	2914.04	324.215	2754.23	3073.85	280.376	368.054	-0.661889	7.12138	106.114	1.34848e-07	1.03674e-06
GL4_0721	CDS	740284	741561	.	iron-regulated protein A precursor	P12608	irpA,Synpcc7942_1462	1278	237519	285113	16877	20952	9300.66	9899.14	4158.76	3828.21	9599.9	3993.49	7277.51	7745.81	3254.11	2995.47	7511.66	3124.79	-1.2651	260796	18984.3	246494	275098	16417.4	21551.3	-1.27399	13.2947	361.729	7.91786e-11	1.62707e-09
GL4_0722	CDS	741710	743119	.	carbohydrate-selective porin	Q51485	oprB,PA3186	1410	359455	418111	19372	25150	14075.4	14516.8	4773.56	4595.25	14296.1	4684.4	9982.54	10295.6	3385.51	3259.04	10139.1	3322.27	-1.60939	388343	22277.3	367046	409640	19265.1	25289.5	-1.61764	13.7761	635.528	2.27461e-12	8.41354e-11
GL4_0723	CDS	743261	744703	.	probable thiol oxidoreductase with 2 cytochrome c heme-binding sites	NA	NA	1443	48050	55910	3174	4122	1881.52	1941.2	782.123	753.145	1911.36	767.634	1303.9	1345.25	542.012	521.93	1324.57	531.971	-1.31449	51921.2	3650.33	49073.8	54768.6	3156.75	4143.91	-1.32417	10.9731	479.065	1.35745e-11	3.67394e-10
GL4_0724	CDS	744763	745875	.	iron-regulated protein A precursor	NA	NA	1113	10740	11668	951	1298	420.552	405.114	234.341	237.162	412.833	235.752	377.855	363.984	210.549	213.084	370.919	211.816	-0.805379	11211.8	1122.6	10597	11826.7	970.807	1274.39	-0.814041	8.95765	190.98	4.08163e-09	4.9231e-08
GL4_0725	CDS	745878	746975	.	putative exported protein	NA	NA	1098	6776	7748	583	760	265.332	269.011	143.66	138.862	267.171	141.261	241.65	245.001	130.838	126.468	243.325	128.653	-0.914145	7257.61	671.651	6859.6	7655.62	580.834	762.469	-0.927625	8.32223	247.265	8.40087e-10	1.24296e-08
GL4_0726	CDS	747093	749405	.	hypothetical protein	NA	NA	2313	19402	21598	3325	3957	759.735	749.884	819.332	722.997	754.809	771.165	328.463	324.204	354.229	312.58	326.334	333.405	0.0308332	20501.4	3662.25	19377.1	21625.7	3167.06	4157.44	0.0211255	10.1307	0.111718	0.74356	0.789573
GL4_0727	CDS	749433	750011	.	hypothetical protein	NA	NA	579	1668	1798	326	413	65.3148	62.4267	80.3315	75.4607	63.8707	77.8961	112.806	107.818	138.742	130.329	110.312	134.536	0.28406	1733.89	369.677	1638.81	1828.98	319.691	419.663	0.276336	6.64901	17.6788	0.00104448	0.00266852
GL4_0728	CDS	750190	751572	.	ribosomal protein S12p Asp88 (E. coli) methylthiotransferase	Q7VS95	rimO,BP0545	1383	1916	2162	382	500	75.0259	75.0648	94.1308	91.3568	75.0453	92.7438	54.2486	54.2768	68.0627	66.057	54.2627	67.0599	0.300498	2038.64	441.02	1926.84	2150.44	381.388	500.653	0.297332	6.89361	24.4143	0.000274723	0.00082244
GL4_0729	CDS	751569	752117	.	superfamily I DNA and RNA helicases	NA	NA	549	817	897	156	206	31.9917	31.1439	38.4408	37.639	31.5678	38.0399	58.2727	56.7284	70.0197	68.5592	57.5006	69.2895	0.264858	857.173	180.989	810.165	904.181	156.517	205.462	0.262307	5.61506	8.74059	0.0111979	0.0209544
GL4_0730	CDS	752171	752638	.	similar to TadZ/CpaE, associated with Flp pilus assembly	NA	NA	468	1776	2063	374	418	69.5438	71.6275	92.1594	76.3743	70.5857	84.2669	148.598	153.05	196.922	163.193	150.824	180.057	0.254047	1918.31	396.917	1813.11	2023.51	343.248	450.586	0.2331	6.78198	9.85051	0.00789571	0.0153354
GL4_0731	CDS	752962	754554	.	hypothetical protein	NA	NA	1593	5556	6432	1359	1713	217.559	223.319	334.879	312.988	220.439	323.934	136.572	140.188	210.219	196.477	138.38	203.348	0.552005	5988.59	1538.93	5660.17	6317.01	1330.85	1747.02	0.545744	8.59534	91.7498	3.11681e-07	2.17068e-06
GL4_0732	CDS	754648	755157	.	similar to secretin RcpA/CpaC, associated with Flp pilus assembly	P55702	NGR_a00790,y4xJ	510	2006	2151	424	486	78.5501	74.6829	104.48	88.7988	76.6165	96.6395	154.02	146.437	204.863	174.115	150.228	189.489	0.332981	2079.87	456.026	1965.81	2193.93	394.364	517.688	0.316715	6.93093	20.7502	0.000548542	0.00152429
GL4_0733	CDS	755366	755872	.	type IV prepilin peptidase TadV/CpaA	NA	NA	507	2279	2418	302	346	89.2401	83.9531	74.4175	63.2189	86.5966	68.8182	176.016	165.588	146.78	124.692	170.802	135.736	-0.329352	2350.54	324.557	2221.64	2479.45	280.672	368.442	-0.350368	6.89733	22.6609	0.000378918	0.00109975
GL4_0734	CDS	755920	756048	.	hypothetical protein	NA	NA	129	57	79	9	17	2.23198	2.74288	2.21774	3.10613	2.48743	2.66194	17.3022	21.2627	17.1918	24.0785	19.2824	20.6352	0.0931476	67.9158	12.9852	64.1913	71.6404	11.2294	14.741	0.118815	1.9733	0.157974	0.702574	0.752856
GL4_0735	CDS	756127	756915	.	Flp pilus assembly protein RcpC/CpaB	NA	NA	789	4115	4762	569	677	161.133	165.337	140.21	123.697	163.235	131.954	204.225	209.553	177.707	156.777	206.889	167.242	-0.305275	4434.86	624.662	4191.65	4678.07	540.198	709.126	-0.321675	7.80278	26.4802	0.000191832	0.000597388
GL4_0736	CDS	756954	758519	.	type II/IV secretion system secretin RcpA/CpaC, associated with Flp pilus assembly	P55702	NGR_a00790,y4xJ	1566	5840	6691	667	778	228.68	232.312	164.359	142.151	230.496	153.255	146.028	148.347	104.955	90.7734	147.188	97.8641	-0.583908	6261.48	725.327	5918.1	6604.86	627.252	823.403	-0.603726	8.20358	86.2943	4.41885e-07	2.90718e-06
GL4_0737	CDS	758538	759296	.	Flp pilus assembly protein CpaD	P55703	NGR_a00780,y4xK	759	2964	3394	296	368	116.063	117.84	72.939	67.2386	116.951	70.0888	152.916	155.257	96.0989	88.5884	154.086	92.3436	-0.732447	3177.41	332.248	3003.16	3351.66	287.323	377.173	-0.751406	7.22171	139.158	2.74003e-08	2.60616e-07
GL4_0738	CDS	759300	760586	.	type II/IV secretion system ATPase TadZ/CpaE, associated with Flp pilus assembly	Q01464	minD,divIVB,BSU27990	1287	5631	6351	591	694	220.496	220.507	145.632	126.803	220.502	136.217	171.326	171.334	113.156	98.5262	171.33	105.841	-0.689708	5989.47	644.68	5661	6317.94	557.509	731.85	-0.709694	8.11206	123.071	5.66833e-08	4.90126e-07
GL4_0739	CDS	760758	762143	.	type II/IV secretion system ATP hydrolase TadA/VirB11/CpaF, TadA subfamily	P9WMT3	Rv3659c	1386	4209	4727	424	497	164.814	164.122	104.48	90.8086	164.468	97.6444	118.914	118.414	75.3826	65.5185	118.664	70.4505	-0.743969	4467.37	461.62	4222.38	4712.36	399.202	524.038	-0.768553	7.68986	142.707	2.35861e-08	2.28916e-07
GL4_0740	CDS	762148	763122	.	Flp pilus assembly protein TadB	NA	NA	975	3155	3480	285	418	123.542	120.826	70.2285	76.3743	122.184	73.3014	126.71	123.924	72.0292	78.3326	125.317	75.1809	-0.729546	3318.28	350.932	3136.3	3500.25	303.481	398.383	-0.735063	7.28484	124.737	5.2368e-08	4.59982e-07
GL4_0741	CDS	763137	764114	.	type II/IV secretion system protein TadC, associated with Flp pilus assembly	NA	NA	978	2265	2506	279	330	88.6919	87.0085	68.75	60.2955	87.8502	64.5227	90.687	88.9657	70.2965	61.6518	89.8263	65.9741	-0.439507	2385.86	304.879	2255.02	2516.7	263.655	346.104	-0.462102	6.88988	45.4167	1.43017e-05	6.00384e-05
GL4_0742	CDS	764268	765266	.	Flp pilus assembly protein TadD, contains TPR repeat	NA	NA	999	4394	4771	584	643	172.058	165.649	143.907	117.485	168.854	130.696	172.231	165.815	144.051	117.602	169.023	130.827	-0.367087	4585.38	616.444	4333.92	4836.85	533.092	699.797	-0.388931	7.8295	29.5144	0.000117124	0.000389115
GL4_0743	CDS	765493	766185	2.5.1.18	glutathione S-transferase	Q18938	gst-42,D1053.1	693	596	708	125	170	23.3379	24.5818	30.802	31.0613	23.9599	30.9316	33.6766	35.4716	44.4473	44.8215	34.5741	44.6344	0.359294	651.482	147.443	615.754	687.209	127.506	167.379	0.362373	5.24301	12.195	0.00400849	0.00843505
GL4_0744	CDS	766207	767661	3.4.11.23	peptidase B	A7NG41	pepA,Rcas_0295	1455	3629	4002	615	828	142.103	138.95	151.546	151.287	140.526	151.416	97.6651	95.4981	104.155	103.977	96.5816	104.066	0.106617	3816.5	720.978	3607.2	4025.8	623.491	818.466	0.10182	7.73468	3.37935	0.0891155	0.128817
GL4_0745	CDS	767658	768515	.	NLP/P60 family lipoprotein	O35010	ykfC,BSU12990	858	920	972	162	224	36.025	33.7479	39.9193	40.9278	34.8864	40.4236	41.9871	39.3332	46.526	47.7014	40.6602	47.1137	0.20778	946.639	192.905	894.724	998.553	166.821	218.989	0.211081	5.74513	5.67073	0.0333351	0.0545052
GL4_0746	CDS	768525	770159	.	oligopeptide transport system permease protein OppB	P33916	yejF,b2180,JW2168	1635	3598	3836	550	670	140.889	133.186	135.529	122.418	137.038	128.973	86.1706	81.4594	82.8921	74.8734	83.815	78.8828	-0.0864349	3720.67	611.152	3516.62	3924.71	528.515	693.789	-0.0999054	7.62522	2.67974	0.125748	0.173772
GL4_0747	CDS	770156	771073	.	cobalt-zinc-cadmium resistance protein CzcD	Q8ZGY6	zitB,YPO1129,y3050,YP_1027	918	1481	1647	251	284	57.9923	57.1839	61.8503	51.8906	57.5881	56.8705	63.1725	62.2919	67.3751	56.5258	62.7322	61.9504	-0.017806	1564.08	267.924	1478.3	1649.85	231.696	304.151	-0.0393667	6.40093	0.251928	0.624166	0.684264
GL4_0748	CDS	771083	772246	.	oligopeptide transport system permease protein OppC	P33915	yejE,b2179,JW2167	1164	3257	3641	570	635	127.536	126.416	140.457	116.023	126.976	128.24	109.567	108.605	120.667	99.6762	109.086	110.172	0.0141619	3448.88	604.932	3259.74	3638.02	523.136	686.728	-0.00523434	7.54936	0.00579172	0.940503	0.950314
GL4_0749	CDS	772246	773319	.	oligopeptide transport system permease protein OppB	P0AFU0	yejB,b2178,JW2166	1074	4158	4826	631	854	162.817	167.559	155.488	156.037	165.188	155.763	151.599	156.014	144.775	145.286	153.806	145.031	-0.0841948	4487.96	741.804	4241.84	4734.09	641.501	842.107	-0.0908997	7.89683	2.49147	0.138629	0.188983
GL4_0750	CDS	773746	775593	.	oligopeptide ABC transporter, periplasmic oligopeptide-binding protein OppA	Q8FW84	BRA0576,BS1330_II0571	1848	3405	3778	508	682	133.331	131.172	125.179	124.611	132.252	124.895	72.1491	70.9807	67.7376	67.43	71.5649	67.5838	-0.0814037	3591.95	594.675	3394.96	3788.93	514.266	675.084	-0.0885395	7.57827	2.46461	0.140598	0.191041
GL4_0751	CDS	775619	777541	.	ABC transporter, periplasmic substrate-binding protein	P55691	NGR_a00920,y4wM	1923	8996	10064	1192	1375	352.261	349.423	293.727	251.231	350.842	272.479	183.183	181.707	152.744	130.645	182.445	141.695	-0.362415	9529.41	1291.07	9006.81	10052	1116.5	1465.65	-0.37776	8.8684	32.9714	6.96784e-05	0.000242382
GL4_0752	CDS	777840	779402	.	membrane c-type cytochrome cy	P30323	cycM,blr1423	1563	40663	46041	6182	7520	1592.26	1598.55	1523.34	1374.01	1595.41	1448.67	1018.72	1022.74	974.627	879.082	1020.73	926.855	-0.139047	43335.1	6884.04	40958.5	45711.6	5953.21	7814.86	-0.14816	11.1314	5.77145	0.0320503	0.0528196
GL4_0753	CDS	779561	780298	2.7.7.38	3-deoxy-manno-octulosonate cytidylyltransferase	Q133H9	kdsB,RPD_3537	738	1063	1243	167	243	41.6245	43.157	41.1514	44.3994	42.3908	42.7754	56.4017	58.4784	55.7607	60.1618	57.4401	57.9612	0.0128096	1152.3	204.807	1089.11	1215.49	177.114	232.5	0.0138624	5.97515	0.0260197	0.874348	0.898643
GL4_0754	CDS	780330	781205	4.2.1.51	prephenate dehydratase	Q9SA96	ADT1,PDT1,At1g11790,F25C20.4	876	1941	2266	336	426	76.0048	78.6757	82.7957	77.836	77.3402	80.3158	86.7635	89.8124	94.5156	88.8538	88.2879	91.6847	0.0538661	2101.96	381.187	1986.68	2217.23	329.645	432.729	0.0428817	6.85071	0.437244	0.520075	0.590294
GL4_0755	CDS	781324	782388	3.5.1.24	choloylglycine hydrolase	P54965	cbh,CPE0709	1065	4628	5086	1476	1719	181.221	176.586	363.709	314.085	178.904	338.897	170.161	165.809	341.511	294.915	167.985	318.213	0.917628	4858.8	1606.57	4592.34	5125.26	1389.34	1823.8	0.9094	8.4832	204.354	2.703e-09	3.39559e-08
GL4_0756	CDS	782685	784529	2.7.7.7	DNA polymerase III subunits gamma and tau	P06710	dnaX,dnaZ,dnaZX,b0470,JW0459	1845	10106	11291	1388	1741	395.726	392.024	342.025	318.104	393.875	330.065	214.486	212.479	185.379	172.414	213.483	178.897	-0.253691	10698.2	1567.98	10111.5	11284.9	1355.97	1780	-0.264335	9.07493	21.0763	0.000514183	0.00144205
GL4_0757	CDS	784583	784903	.	hypothetical protein co-occurring with RecR	A6WUU9	Oant_0022	321	1785	2086	188	310	69.8962	72.4261	46.3261	56.6412	71.1611	51.4837	217.745	225.626	144.318	176.452	221.686	160.385	-0.464501	1934.11	248.46	1828.04	2040.18	214.864	282.055	-0.454481	6.59548	26.9755	0.000176518	0.000552281
GL4_0758	CDS	785171	785719	.	expressed protein	O69777		549	56585	65367	2043	3108	2215.73	2269.55	503.427	567.874	2242.64	535.65	4035.94	4133.96	916.989	1034.38	4084.95	975.684	-2.06471	60918.9	2554.3	57578	64259.7	2208.92	2899.68	-2.06983	11.0368	774.855	6.46048e-13	2.90634e-11
GL4_0759	CDS	785882	786493	.	recombination protein RecR	Q98BM4	recR,mlr5510	612	2479	2889	239	270	97.0716	100.306	58.8933	49.3327	98.6889	54.113	158.614	163.899	96.2309	80.6089	161.256	88.4199	-0.859607	2681.9	254.901	2534.82	2828.98	220.435	289.368	-0.889101	6.95949	136.082	3.12919e-08	2.92614e-07
GL4_0760	CDS	786495	786719	.	hypothetical protein	NA	NA	225	313	308	39	68	12.2563	10.6938	9.61021	12.4245	11.475	11.0174	54.4725	47.5279	42.712	55.2201	51.0002	48.9661	-0.0575687	311.026	53.3604	293.969	328.083	46.1452	60.5755	-0.0371258	4.08663	0.0446824	0.835887	0.866803
GL4_0761	CDS	786716	788065	.	AmpG permease	P24326	HI_0350	1350	3483	3824	540	780	136.386	132.77	133.064	142.517	134.578	137.791	101.026	98.3478	98.5663	105.568	99.6871	102.067	0.0337036	3654.79	658.34	3454.36	3855.22	569.323	747.358	0.0331621	7.64606	0.30165	0.592217	0.657602
GL4_0762	CDS	788122	788583	.	lactoylglutathione lyase	P54557	yqjT,BSU23750	462	379	393	67	115	14.8407	13.645	16.5098	21.0121	14.2428	18.761	32.1228	29.5346	35.7356	45.4806	30.8287	40.6081	0.386538	386.399	90.6861	365.208	407.589	78.4239	102.948	0.414709	4.49708	7.8396	0.015108	0.0271996
GL4_0763	CDS	788741	789661	.	manganese ABC transporter, periplasmic-binding protein SitA	Q56952	yfeA,YPO2439,y1897,YP_2227	921	3598	4067	281	410	140.889	141.206	69.2428	74.9126	141.048	72.0777	152.974	153.319	75.1822	81.3383	153.146	78.2602	-0.959631	3831.47	344.933	3621.35	4041.59	298.293	391.573	-0.967386	7.43313	216.191	1.91616e-09	2.5414e-08
GL4_0764	CDS	789689	790594	.	manganese ABC transporter, ATP-binding protein SitB	Q56953	yfeB,YPO2440,y1896,YP_2228	906	1917	2196	170	275	75.065	76.2453	41.8907	50.2462	75.6551	46.0684	82.8532	84.1559	46.2369	55.4594	83.5046	50.8482	-0.704736	2055.64	222.099	1942.91	2168.37	192.068	252.13	-0.704174	6.62708	69.8765	1.43988e-06	8.09684e-06
GL4_0765	CDS	790591	791508	.	manganese ABC transporter, inner membrane permease protein SitC	Q56954	yfeC,YPO2441,y1895,YP_2229	918	1126	1208	104	159	44.0914	41.9418	25.6272	29.0515	43.0166	27.3393	48.0299	45.6883	27.9164	31.6465	46.8591	29.7814	-0.636733	1167.62	131.371	1103.59	1231.65	113.608	149.135	-0.645651	5.85106	43.4457	1.79321e-05	7.28001e-05
GL4_0766	CDS	791508	792401	.	manganese ABC transporter, inner membrane permease protein SitD	Q56955	yfeD,YPO2442,y1894,YP_2230	894	1201	1309	166	216	47.0282	45.4486	40.905	39.4661	46.2384	40.1856	52.6043	50.8373	45.755	44.1456	51.7208	44.9503	-0.198298	1255.4	191.014	1186.55	1324.25	165.186	216.842	-0.210309	6.04232	6.68121	0.0227426	0.0386671
GL4_0767	CDS	792398	792889	.	hypothetical protein	NA	NA	492	919	982	100	152	35.9858	34.0951	24.6416	27.7725	35.0404	26.207	73.1419	69.299	50.0845	56.4481	71.2204	53.2663	-0.412351	951.041	125.869	898.885	1003.2	108.85	142.888	-0.411433	5.60586	15.9602	0.00154463	0.00369667
GL4_0768	CDS	792920	794158	.	DNA recombination protein RmuC	Q9KVQ7	rmuC,VC_0082	1239	2904	3296	399	517	113.714	114.437	98.3198	94.4629	114.075	96.3914	91.7785	92.3627	79.3542	76.2412	92.0706	77.7977	-0.240171	3098.97	458.109	2929.02	3268.92	396.166	520.052	-0.251961	7.31551	18.5578	0.000862782	0.00226158
GL4_0769	CDS	794288	794806	3.5.1.88	peptide deformylase	Q92SH6	def,R00419,SMc01101	519	1006	1076	169	217	39.3925	37.3588	41.6442	39.6488	38.3756	40.6465	75.9008	71.9823	80.2394	76.3947	73.9415	78.317	0.0818657	1041.56	193.039	984.441	1098.68	166.937	219.141	0.0742499	5.84613	0.756354	0.400343	0.47378
GL4_0770	CDS	794857	795783	2.1.2.9	methionyl-tRNA formyltransferase	Q11LC8	fmt,Meso_0393	927	1055	1215	198	228	41.3112	42.1849	48.7903	41.6587	41.748	45.2245	44.5644	45.5069	52.6325	44.9393	45.0357	48.7859	0.112985	1134.54	213.268	1072.32	1196.76	184.431	242.105	0.0946637	5.97513	1.20525	0.292317	0.36189
GL4_0771	CDS	795798	796535	4.2.1.70	tRNA pseudouridine synthase A	A7IKI9	truA,Xaut_3303	738	514	494	85	97	20.127	17.1517	20.9453	17.7232	18.6393	19.3343	27.2723	23.2408	28.3812	24.0152	25.2566	26.1982	0.0508328	505.12	91.1504	477.419	532.821	78.8255	103.475	0.0357265	4.7943	0.0626721	0.806259	0.842182
GL4_0772	CDS	796575	798209	.	proposed peptidoglycan lipid II flippase MurJ	P56882	murJ,mviN,R00397,SMc01123	1635	1249	1247	171	239	48.9078	43.2959	42.1371	43.6685	46.1019	42.9028	29.913	26.4807	25.7719	26.7086	28.1969	26.2402	-0.100073	1249.86	204.885	1181.32	1318.4	177.181	232.589	-0.102816	6.06241	1.20876	0.291644	0.361569
GL4_0773	CDS	798226	799056	5.1.1.3	glutamate racemase	Q39Y84	murI,Gmet_0547	831	744	858	145	157	29.1332	29.7898	35.7303	28.686	29.4615	32.2081	35.058	35.8482	42.9967	34.5199	35.4531	38.7583	0.125215	800.667	151.274	756.758	844.576	130.82	171.729	0.101986	5.47344	0.932643	0.351909	0.424459
GL4_0774	CDS	799046	800236	3.5.1.18	N-succinyl-L,L-diaminopimelate desuccinylase	B3QCH4	dapE,Rpal_0628	1191	1922	2197	369	438	75.2608	76.28	90.9274	80.0285	75.7704	85.478	63.1913	64.047	76.3454	67.1944	63.6191	71.7699	0.17138	2058.7	404.104	1945.8	2171.6	349.463	458.745	0.157095	6.85861	5.61794	0.0340328	0.0555369
GL4_0775	CDS	800389	800847	.	integral membrane protein	P64592	yhaI,b3104,JW3075	459	4791	5209	813	941	187.604	180.857	200.336	171.933	184.23	186.135	408.723	394.024	436.462	374.583	401.373	405.522	0.0147996	5003.1	880.927	4728.72	5277.47	761.813	1000.04	0.000320978	8.08718	2.4666e-05	0.996113	0.997012
GL4_0776	CDS	801008	801850	2.3.1.117	2,3,4,5-tetrahydropyridine-2,6-dicarboxylate N-succinyltransferase	B2IDV9	dapD,Bind_3332	843	3364	3583	569	699	131.726	124.402	140.21	127.717	128.064	133.964	156.259	147.571	166.323	151.503	151.915	158.913	0.0645609	3476.93	635.073	3286.25	3667.61	549.202	720.944	0.0532241	7.58183	0.782039	0.39268	0.466036
GL4_0777	CDS	801875	802660	3.1.3.74	pyridoxal-5'-phosphate phosphatase, alphaproteobacterial type	P53078	SDT1,SSM1,YGL224C	786	2090	2399	310	389	81.8393	83.2934	76.3888	71.0756	82.5664	73.7322	104.121	105.971	97.1868	90.4269	105.046	93.8069	-0.16163	2243.44	349.709	2120.41	2366.47	302.423	396.995	-0.17542	6.87824	7.37751	0.0177245	0.031203
GL4_0778	CDS	802657	803643	2.7.2.8	acetylglutamate kinase	A7HPT7	argB,Plav_0297	987	3450	3852	566	671	135.094	133.742	139.471	122.601	134.418	131.036	136.873	135.503	141.308	124.216	136.188	132.762	-0.0364875	3650.97	620.104	3450.75	3851.19	536.257	703.952	-0.0516457	7.61477	0.713659	0.413604	0.487912
GL4_0779	CDS	803670	804344	.	GTP-binding protein EngB	Q2RP11	engB,Rru_A3340	675	1308	1441	204	241	51.2181	50.0316	50.2688	44.034	50.6248	47.1514	75.8786	74.1209	74.4723	65.2355	74.9998	69.8539	-0.101148	1374.74	222.72	1299.35	1450.14	192.605	252.835	-0.119792	6.19434	2.2517	0.157508	0.2116
GL4_0780	CDS	804397	806463	.	inner membrane protein translocase component YidC, long form	Q89BQ0	yidC,blr8098	2067	13777	15914	1944	2435	539.474	552.535	479.032	444.907	546.004	461.97	260.994	267.313	231.752	215.243	264.153	223.498	-0.240125	14832	2195.06	14018.6	15645.4	1898.25	2491.86	-0.250331	9.5475	17.8584	0.00100401	0.00257903
GL4_0781	CDS	806515	806901	3.1.26.5	ribonuclease P protein component	Q5LW06	rnpA,SPO0537	387	1924	2071	287	348	75.3391	71.9053	70.7213	63.5843	73.6222	67.1528	194.675	185.802	182.742	164.301	190.238	173.521	-0.131967	1998.64	317.799	1889.03	2108.25	274.828	360.77	-0.146769	6.72189	4.52625	0.0532204	0.0824433
GL4_0782	CDS	806926	807060	.	LSU ribosomal protein L34p	B1LUP6	rpmH,Mrad2831_3505	135	4072	4588	779	978	159.45	159.296	191.958	178.694	159.373	185.326	1181.11	1179.97	1421.91	1323.66	1180.54	1372.78	0.217489	4329.05	879.845	4091.65	4566.46	760.877	998.813	0.207307	7.96027	13.6808	0.00270327	0.00597953
GL4_0783	CDS	807360	808151	.	uncharacterized membrane protein	Q8MXN7	DDB_G0275543	792	964	1098	164	246	37.7479	38.1226	40.4122	44.9475	37.9353	42.6798	47.6615	48.1346	51.0255	56.7519	47.8981	53.8887	0.166732	1030.74	204.741	974.21	1087.26	177.057	232.425	0.174208	5.85791	3.92257	0.0693452	0.103706
GL4_0784	CDS	808195	809619	1.16.1.1	mercuric ion reductase	P0A0E4	merA,SE_0085	1425	1322	1421	236	320	51.7663	49.3372	58.1541	58.4683	50.5517	58.3112	36.3272	34.6226	40.8099	41.0304	35.4749	40.9201	0.200739	1372.2	277.9	1296.95	1447.45	240.324	315.477	0.202166	6.28263	7.56711	0.0165913	0.0294731
GL4_0785	CDS	809766	811226	.	sensor histidine kinase in cluster with mercury reductase	Q3M8A7	sasA,Ava_3171	1461	4091	4495	760	903	160.194	156.067	187.276	164.99	158.13	176.133	109.647	106.822	128.183	112.93	108.234	120.557	0.154203	4294.53	834.25	4059.02	4530.05	721.447	947.053	0.142092	7.92198	5.48334	0.0358914	0.0580575
GL4_0786	CDS	811258	811629	.	hypothetical protein	NA	NA	372	2557	3097	497	628	100.126	107.528	122.469	114.744	103.827	118.606	269.156	289.054	329.217	308.452	279.105	318.834	0.191358	2822.57	562.957	2667.78	2977.36	486.837	639.078	0.180122	7.32586	7.899	0.0148056	0.0267432
GL4_0787	CDS	811717	812094	.	1-pyrroline-5-carboxylate dehydrogenase 2	A5W002	Pput_1301	378	703	763	159	174	27.5278	26.4914	39.1801	31.7922	27.0096	35.4861	72.8248	70.0831	103.651	84.1062	71.4539	93.8786	0.389019	733.254	166.824	693.042	773.467	144.267	189.381	0.369967	5.41797	12.6352	0.00355752	0.00759652
GL4_0789	CDS	812538	815717	.	acriflavin resistance protein	D0ZEW1	mdtB,ETAE_1070	3180	9021	9983	1293	1685	353.24	346.61	318.615	307.872	349.925	313.244	111.082	108.997	100.194	96.8152	110.039	98.5044	-0.15824	9504.07	1489.52	8982.86	10025.3	1288.11	1690.92	-0.167649	8.94324	8.94082	0.0104979	0.0198227
GL4_0790	CDS	815744	816868	.	probable RND efflux membrane fusion protein	D2BTK6	mdtA,Dd586_3002	1125	4790	5285	680	831	187.565	183.496	167.563	151.835	185.53	159.699	166.724	163.107	148.945	134.964	164.916	141.954	-0.214894	5038.86	757.247	4762.53	5315.19	654.856	859.638	-0.228204	8.01459	14.9863	0.00194994	0.00450476
GL4_0791	CDS	816827	817027	.	hypothetical protein	NA	NA	201	67	78	15	20	2.62356	2.70816	3.69623	3.65427	2.66586	3.67525	13.0525	13.4735	18.3892	18.1805	13.263	18.2848	0.435191	72.4815	17.4988	68.5065	76.4564	15.1327	19.8649	0.454551	2.12335	3.36416	0.104793	0.148323
GL4_0792	CDS	817103	818116	2.3.1.31	homoserine O-acetyltransferase	A4G1K0	metX,HEAR0152	1014	953	1102	173	226	37.3171	38.2615	42.6299	41.2933	37.7893	41.9616	36.8019	37.7332	42.0413	40.7231	37.2676	41.3822	0.147337	1027.04	199.509	970.719	1083.37	172.532	226.486	0.14205	5.8439	2.85462	0.115085	0.160704
GL4_0793	CDS	818125	819486	6.3.1.2	glutamine synthetase type I	A9ZPH9		1362	1257	1396	255	299	49.221	48.4692	62.836	54.6313	48.8451	58.7337	36.1388	35.5868	46.1351	40.1111	35.8628	43.1231	0.259369	1326.59	277.35	1253.84	1399.34	239.848	314.852	0.24807	6.24802	10.4552	0.00658066	0.0130012
GL4_0794	CDS	819593	819769	.	hypothetical protein	NA	NA	177	436	483	66	99	17.0727	16.7698	16.2634	18.0886	16.9212	17.176	96.4559	94.7446	91.8838	102.196	95.6002	97.0398	0.0213401	459.551	82.3724	434.349	484.753	71.2344	93.5104	0.0260432	4.65761	0.0374673	0.849527	0.878012
GL4_0795	CDS	819809	821188	.	ammonium transporter	Q60366	MJ0058	1380	867	936	174	283	33.9496	32.498	42.8763	51.7079	33.2238	47.2921	24.6012	23.5493	31.0698	37.4695	24.0752	34.2697	0.492166	901.857	227.979	852.398	951.315	197.153	258.805	0.521946	5.7695	29.0188	0.00012663	0.000415731
GL4_0796	CDS	821362	822717	6.3.1.2	glutamine synthetase type I	A9ZPH9		1356	1171	1252	164	252	45.8535	43.4695	40.4122	46.0438	44.6615	43.228	33.8153	32.0572	29.8025	33.9556	32.9362	31.879	-0.0456572	1212.19	207.704	1145.71	1278.66	179.619	235.788	-0.0389613	6.03438	0.193126	0.667589	0.722733
GL4_0797	CDS	822843	823571	.	transcriptional regulator, GntR family	P44487	uxuR,HI_0054	729	498	547	118	193	19.5005	18.9919	29.077	35.2637	19.2462	32.1704	26.7496	26.052	39.8862	48.3727	26.4008	44.1295	0.719853	522.608	155.028	493.948	551.268	134.066	175.99	0.752608	5.03797	40.7369	2.48053e-05	9.62435e-05
GL4_0798	CDS	823624	824124	.	acetyltransferase	P39979	HPA3,YEL066W	501	332	305	53	54	13.0003	10.5896	13.06	9.86653	11.795	11.4633	25.9487	21.137	26.0679	19.6937	23.5428	22.8808	-0.0394512	319.341	53.6288	301.828	336.854	46.3774	60.8803	-0.0679233	4.11754	0.135694	0.718566	0.766455
GL4_0799	CDS	824124	825428	6.3.1.2	glutamine synthetase type I	P31592	glnT	1305	1511	1639	229	299	59.1671	56.9062	56.4292	54.6313	58.0366	55.5303	45.3387	43.6063	43.2408	41.8631	44.4725	42.5519	-0.062258	1575.65	264.015	1489.24	1662.06	228.316	299.714	-0.0711964	6.40233	0.981188	0.340098	0.412303
GL4_0800	CDS	825489	826814	1.4.1.13	glutamate synthase [NADPH] large chain	O87392	glxD,R00089,SMc02612	1326	1590	1783	250	331	62.2605	61.9059	61.6039	60.4782	62.0832	61.041	46.9536	46.6862	46.4585	45.6095	46.8199	46.034	-0.0239081	1686.38	290.472	1593.9	1778.86	251.196	329.748	-0.0314075	6.51081	0.21113	0.65352	0.70981
GL4_0801	CDS	826814	827503	1.4.1.13	glutamate synthase [NADPH] putative GlxC chain	O87391	glxC,R00088,SMc02611	690	610	656	91	137	23.8861	22.7764	22.4238	25.0318	23.3312	23.7278	34.6175	33.0092	32.4983	36.2779	33.8134	34.3881	0.0236223	633.32	113.845	598.588	668.051	98.4515	129.239	0.0301741	5.11864	0.0690218	0.79691	0.833987
GL4_0802	CDS	827506	828324	.	glutamine amidotransferase protein GlxB	O87390	glxB,R00087,SMc02610	819	781	787	100	159	30.5821	27.3247	24.6416	29.0515	28.9534	26.8465	37.3407	33.3635	30.0874	35.4719	35.3521	32.7796	-0.105886	785.045	129.289	741.993	828.097	111.807	146.77	-0.0961059	5.39833	0.674515	0.426379	0.500853
GL4_0803	CDS	828512	829213	.	transcriptional regulator, MerR family	P06153		702	1183	1202	206	235	46.3234	41.7335	50.7616	42.9377	44.0285	46.8497	65.9877	59.4495	72.31	61.1648	62.7186	66.7374	0.0882381	1193.97	220.801	1128.49	1259.45	190.945	250.656	0.071088	6.04297	0.581205	0.459535	0.532877
GL4_0804	CDS	829311	830240	.	HTH-type transcriptional regulator glxA	O87389	glxA,R00086,SMc02609	930	502	513	63	106	19.6571	17.8114	15.5242	19.3676	18.7342	17.4459	21.1367	19.152	16.6927	20.8254	20.1443	18.759	-0.0977589	508.172	84.2712	480.304	536.041	72.8764	95.6659	-0.0861244	4.77847	0.358753	0.559557	0.62804
GL4_0805	CDS	830460	831710	1.5.3.1	sarcosine oxidase beta subunit	O87388	soxB,R00085,SMc02608	1251	399	428	70	126	15.6239	14.8602	17.2491	23.0219	15.242	20.1355	12.4891	11.8786	13.7882	18.4028	12.1839	16.0955	0.374844	413.734	97.5902	391.045	436.424	84.3945	110.786	0.42196	4.59845	8.11937	0.0137438	0.0250703
GL4_0806	CDS	831720	831983	1.5.3.1	sarcosine oxidase delta subunit	O87387	soxD,R00084,SMc02607	264	77	81	16	20	3.01513	2.81233	3.94265	3.65427	2.91373	3.79846	11.421	10.6527	14.9343	13.8419	11.0369	14.3881	0.354358	79.0303	18.0039	74.6962	83.3644	15.5695	20.4383	0.371068	2.22656	2.30209	0.174118	0.230656
GL4_0807	CDS	831991	834963	1.5.3.1	sarcosine oxidase alpha subunit	O87386	soxA,R00083,SMc02606	2973	1094	1209	212	308	42.8384	41.9766	52.2401	56.2758	42.4075	54.2579	14.4091	14.1193	17.5715	18.929	14.2642	18.2502	0.334724	1151.64	259.713	1088.49	1214.8	224.596	294.83	0.357284	6.07552	20.4938	0.000577437	0.00159526
GL4_0808	CDS	834956	835558	1.5.3.1	sarcosine oxidase gamma subunit	Q9AGP0	soxG	603	165	202	31	59	6.461	7.01345	7.63888	10.7801	6.73722	9.20949	10.7148	11.6309	12.6681	17.8774	11.1728	15.2728	0.418795	183.316	44.8506	173.262	193.369	38.7861	50.915	0.474444	3.43756	5.80367	0.0316516	0.0522142
GL4_0809	CDS	835753	836175	.	hypothetical protein	NA	NA	423	261	307	63	98	10.2201	10.6591	15.5242	17.9059	10.4396	16.7151	24.161	25.1987	36.7002	42.3308	24.6799	39.5155	0.657835	283.81	80.3228	268.246	299.375	69.462	91.1837	0.684592	4.12053	21.2878	0.00049323	0.00138796
GL4_0810	CDS	836499	838202	.	putative Glutathione-regulated potassium-efflux system protein KefB	P39830	ybaL,ylaA,b0478,JW0467	1704	2992	3200	682	890	117.159	111.104	168.055	162.615	114.132	165.335	68.7555	65.202	98.6241	95.4314	66.9788	97.0277	0.528106	3098.72	786.135	2928.78	3268.65	679.838	892.432	0.527194	7.60804	88.6793	3.78463e-07	2.54985e-06
GL4_0811	CDS	838223	838591	.	hypothetical protein	NA	NA	369	908	937	591	878	35.5551	32.5327	145.632	160.422	34.0439	153.027	96.3552	88.1645	394.666	434.749	92.2598	414.707	2.15624	923.264	732.503	872.631	973.896	633.457	831.548	2.17188	6.69778	912.232	2.28498e-13	1.3115e-11
GL4_0812	CDS	838584	838994	.	hypothetical protein	NA	NA	411	947	1053	1015	1400	37.0822	36.5602	250.112	255.799	36.8212	252.955	90.2243	88.9543	608.545	622.382	89.5893	615.463	2.7666	1000.05	1205.49	945.203	1054.89	1042.49	1368.49	2.77533	7.35406	2431.82	4.27918e-16	1.25983e-13
GL4_0813	CDS	839079	840599	1.2.1.3	aldehyde dehydrogenase	Q9RYG9	aldA,DR_A0348	1521	8574	9784	38877	53362	335.737	339.701	9579.9	9749.96	337.719	9664.93	220.734	223.341	6298.42	6410.23	222.037	6354.33	4.83261	9173.69	45982.3	8670.6	9676.78	39764.8	52199.8	4.83152	12.825	4481.58	8.37157e-18	1.39345e-14
GL4_0814	CDS	840828	841013	.	hypothetical protein	NA	NA	186	700	816	124	173	27.4103	28.3316	30.5555	31.6094	27.8709	31.0825	147.367	152.32	164.277	169.943	149.844	167.11	0.156352	757.58	148.413	716.034	799.127	128.345	168.48	0.154222	5.4066	2.41323	0.144462	0.195531
GL4_0815	CDS	841098	842162	.	GfdT protein	NA	NA	1065	2343	2663	195	277	91.7462	92.4595	48.051	50.6117	92.1028	49.3314	86.1466	86.8165	45.1184	47.5227	86.4815	46.3205	-0.886513	2502.2	235.824	2364.98	2639.42	203.937	267.711	-0.901261	6.86098	162.912	1.06737e-08	1.12446e-07
GL4_0816	CDS	842162	843508	.	two-component hybrid sensor and regulator	P39453	torS,yccI,b0993,JW5135	1347	3080	3319	405	581	120.605	115.236	99.7983	106.157	117.921	102.977	89.5362	85.55	74.0893	78.8096	87.5431	76.4495	-0.193125	3201.76	492.137	3026.17	3377.34	425.593	558.682	-0.19567	7.37879	9.81067	0.00799261	0.0154964
GL4_0817	CDS	843546	844220	.	transcriptional regulator, LuxR family	A8R3T0	agmR	675	1982	2234	1528	2036	77.6103	77.5646	376.523	372.005	77.5874	374.264	114.978	114.911	557.812	551.118	114.944	554.465	2.26026	2107.58	1780.75	1992	2223.16	1539.97	2021.54	2.26283	8.14771	1690.7	4.41551e-15	5.65355e-13
GL4_0818	CDS	844323	845333	1.1.1.1	alcohol dehydrogenase	P9WQC1	adhA,Rv1862	1011	2023	2280	236	296	79.2157	79.1617	58.1541	54.0832	79.1887	56.1186	78.3538	78.3004	57.5214	53.4948	78.3271	55.5081	-0.489358	2151.16	266.123	2033.19	2269.13	230.14	302.107	-0.508838	6.73329	55.882	4.83918e-06	2.29809e-05
GL4_0819	CDS	845345	845761	.	inhibitor of vertebrate lysozyme precursor	P58483	YPO2857,y1376,YP_2723	417	1968	2172	217	295	77.0621	75.412	53.4722	53.9005	76.237	53.6863	184.801	180.844	128.231	129.258	182.823	128.744	-0.502644	2070.37	255.912	1956.83	2183.91	221.309	290.515	-0.51006	6.67917	54.802	5.36825e-06	2.51349e-05
GL4_0820	CDS	845834	846361	.	hypothetical protein	NA	NA	528	1737	1974	306	335	68.0167	68.5374	75.4032	61.209	68.277	68.3061	128.819	129.806	142.809	115.926	129.313	129.368	0.000609462	1854.99	321.204	1753.26	1956.71	277.772	364.635	-0.023798	6.65069	0.0929507	0.765315	0.807011
GL4_0821	CDS	846933	848129	.	scaffold protein for [4Fe-4S] cluster assembly ApbC, MRP-like	Q54F15	nubpl,DDB_G0291193	1197	7788	8857	1224	1579	304.959	307.516	301.613	288.505	306.237	295.059	254.769	256.905	251.974	241.023	255.837	246.499	-0.0534352	8318.51	1402.63	7862.32	8774.7	1212.97	1592.29	-0.0621407	8.79432	1.22521	0.288527	0.358131
GL4_0822	CDS	848313	850241	6.3.5.4	asparagine synthetase [glutamine-hydrolyzing]	P54420	asnB,asn,BSU30540	1929	6633	7391	977	1252	259.732	256.616	240.748	228.757	258.174	234.753	134.646	133.031	124.805	118.589	133.838	121.697	-0.136135	7012.28	1115.62	6627.72	7396.84	964.772	1266.47	-0.145984	8.51614	6.76097	0.0220902	0.0377119
GL4_0823	CDS	850304	852259	.	diguanylate cyclase/phosphodiesterase (GGDEF & EAL domains) with PAS/PAC sensor(s)	Q9ABX9	CC_0091	1956	4242	4489	780	1057	166.106	155.858	192.204	193.128	160.982	192.666	84.9214	79.6822	98.2639	98.7363	82.3018	98.5001	0.25635	4370.86	917.473	4131.16	4610.56	793.417	1041.53	0.253857	7.99397	19.1938	0.000754012	0.00201291
GL4_0824	CDS	852465	853469	.	molybdenum cofactor biosynthesis protein MoaA	Q139F2	moaA,RPD_2052	1005	4250	4724	701	830	166.42	164.018	172.737	151.652	165.219	162.195	165.592	163.202	171.878	150.898	164.397	161.388	-0.0264859	4487.42	768.005	4241.33	4733.51	664.159	871.851	-0.0406492	7.91517	0.441515	0.518078	0.588829
GL4_0825	CDS	853713	853907	.	hypothetical protein	NA	NA	195	840	976	185	227	32.8923	33.8868	45.5869	41.476	33.3896	43.5314	168.679	173.778	233.779	212.697	171.229	223.238	0.380707	907.559	206.141	857.788	957.33	178.268	234.015	0.367614	5.72938	17.8583	0.00100403	0.00257903
GL4_0826	CDS	853926	854297	.	hypothetical protein co-occurring with HEAT repeat protein	NA	NA	372	1196	1272	265	302	46.8324	44.1639	65.3001	55.1795	45.4982	60.2398	125.894	118.72	175.538	148.332	122.307	161.935	0.402043	1234.77	283.964	1167.06	1302.49	245.568	322.36	0.38552	6.18811	22.0556	0.000425047	0.00120939
GL4_0827	CDS	854331	855107	2.1.1.63	ADA regulatory protein	P06134	ada,b2213,JW2201	777	855	894	151	168	33.4797	31.0397	37.2088	30.6959	32.2597	33.9523	43.0884	39.9482	47.8877	39.5056	41.5183	43.6967	0.0720835	875.22	159.739	827.222	923.217	138.14	181.338	0.0521036	5.58962	0.257402	0.620461	0.681238
GL4_0828	CDS	855797	857173	2.7.13.3	phosphate regulon sensor protein PhoR	P23545	phoR,BSU29100	1377	3536	3805	703	876	138.461	132.11	173.23	160.057	135.285	166.644	100.553	95.9403	125.803	116.236	98.2465	121.019	0.298021	3673.42	790.752	3471.96	3874.87	683.83	897.673	0.290207	7.75499	25.7161	0.000218569	0.000673962
GL4_0829	CDS	857337	858380	.	phosphate ABC transporter, periplasmic phosphate-binding protein PstS	Q4L694	pstS,SH1522	1044	5873	6374	501	680	229.972	221.306	123.454	124.245	225.639	123.85	220.28	211.979	118.251	119.009	216.129	118.63	-0.859975	6127.66	589.936	5791.61	6463.7	510.167	669.704	-0.870618	8.10199	212.199	2.14753e-09	2.80358e-08
GL4_0830	CDS	858506	859978	.	phosphate transport system permease protein PstC	P46339	yqgH,yzmC,BSU24980	1473	2164	2424	276	378	84.7369	84.1614	68.0107	69.0657	84.4492	68.5382	57.5268	57.1361	46.1716	46.8878	57.3314	46.5297	-0.295445	2293.86	326.827	2168.06	2419.65	282.635	371.019	-0.305098	6.87381	22.5027	0.00039039	0.00112813
GL4_0831	CDS	859978	861285	.	phosphate transport system permease protein PstA	P46340	yqgI,yzmD,BSU24970	1308	1905	2130	225	347	74.5951	73.9537	55.4435	63.4016	74.2744	59.4226	57.0299	56.5396	42.388	48.4722	56.7847	45.4301	-0.315628	2017.44	285.508	1906.8	2128.08	246.903	324.113	-0.314841	6.68913	17.3881	0.00111407	0.00281178
GL4_0832	CDS	861300	862148	.	phosphate transport ATP-binding protein PstB	Q2RWU0	pstB,Rru_A0601	849	2229	2538	340	473	87.2822	88.1195	83.7813	86.4235	87.7009	85.1024	102.806	103.792	98.6824	101.794	103.299	100.238	-0.0429686	2382.67	406.139	2252	2513.33	351.223	461.056	-0.0464795	7.00267	0.556592	0.468996	0.542302
GL4_0833	CDS	862175	862909	.	phosphate transport system regulatory protein PhoU	Q52989	phoU,R00514,SMc02141	735	1760	2028	218	295	68.9173	70.4123	53.7186	53.9005	69.6648	53.8096	93.765	95.799	73.0865	73.334	94.782	73.2103	-0.368136	1893.06	256.422	1789.25	1996.88	221.75	291.095	-0.378033	6.584	28.3916	0.000139967	0.000452817
GL4_0834	CDS	862943	863632	.	phosphate regulon transcriptional regulatory protein PhoB	Q52990	phoB,R00515,SMc02140	690	1421	1660	246	290	55.6429	57.6353	60.6182	52.9869	56.6391	56.8026	80.6419	83.5294	87.8525	76.7926	82.0856	82.3226	0.00410845	1539.5	268.308	1455.07	1623.92	232.028	304.587	-0.0144498	6.38481	0.0349006	0.854706	0.881995
GL4_0835	CDS	863757	864269	.	GcrA cell cycle regulator	NA	NA	513	6079	6927	1133	1595	238.039	240.506	279.189	291.428	239.272	285.309	464.013	468.822	544.228	568.086	466.418	556.157	0.253371	6499.64	1359.73	6143.2	6856.09	1175.87	1543.59	0.249001	8.5715	18.1502	0.000942057	0.00244626
GL4_0836	CDS	864660	865841	2.6.1.11	acetylornithine aminotransferase	Q98BB7	argD,mlr5646	1182	4993	5645	626	832	195.514	195.995	154.256	152.018	195.754	153.137	165.409	165.816	130.504	128.611	165.613	129.557	-0.351813	5317.36	728.713	5025.75	5608.97	630.18	827.246	-0.361224	8.04691	40.5629	2.53423e-05	9.80984e-05
GL4_0837	CDS	865885	867009	2.1.3.3	ornithine carbamoyltransferase	Q1QQG6	argF,Nham_0643	1125	3226	3648	388	496	126.322	126.659	95.6093	90.6259	126.491	93.1176	112.286	112.586	84.986	80.5564	112.436	82.7712	-0.437353	3436.07	442.218	3247.64	3624.51	382.424	502.013	-0.451849	7.40448	58.4092	3.82014e-06	1.86197e-05
GL4_0838	CDS	867006	867947	.	chaperone protein Hsp33	P58097	hslO,CC_2241	942	2864	3175	299	432	112.147	110.236	73.6783	78.9323	111.192	76.3053	119.052	117.024	78.2147	83.7922	118.038	81.0035	-0.537664	3019.89	364.989	2854.28	3185.5	315.637	414.341	-0.542476	7.19944	71.13	1.30518e-06	7.46551e-06
GL4_0839	CDS	867966	869129	3.5.1.16	acetylornithine deacetylase	Q9CLT9	argE,PM1117	1164	3163	3529	237	322	123.855	122.527	58.4005	58.8338	123.191	58.6171	106.405	105.264	50.1723	50.5445	105.834	50.3584	-1.0567	3346.02	279.386	3162.52	3529.52	241.609	317.163	-1.07597	7.22701	280.496	3.85515e-10	6.38497e-09
GL4_0840	CDS	869134	870333	2.5.1.49	O-acetylhomoserine sulfhydrylase	P9WGB5	metZ,Rv0391	1200	6471	7208	485	604	253.389	250.262	119.512	110.359	251.825	114.935	211.157	208.552	99.593	91.9658	209.854	95.7794	-1.12348	6839.83	545.307	6464.73	7214.93	471.573	619.041	-1.14272	8.19126	352.095	9.37257e-11	1.8796e-09
GL4_0841	CDS	870540	871271	.	transcriptional regulator, AraC family	Q8G9F9	inhA	732	768	811	136	205	30.073	28.158	33.5125	37.4563	29.1155	35.4844	41.0833	38.4672	45.7821	51.1698	39.7753	48.476	0.279034	790.043	170.265	746.716	833.369	147.242	193.287	0.291824	5.50459	8.55328	0.0119026	0.0220623
GL4_0842	CDS	871361	872554	3.5.4.13	deoxycytidine triphosphate deaminase	B8D0W3	dcd,Hore_01700	1194	4431	5226	628	779	173.507	181.447	154.749	142.334	177.477	148.541	145.316	151.966	129.606	119.208	148.641	124.407	-0.254891	4822.3	704.711	4557.84	5086.76	609.424	799.999	-0.268557	7.93855	19.4834	0.00070981	0.00190869
GL4_0843	CDS	872606	873991	.	sodium/glycine symporter GlyP	P44917	HI_0883	1386	3304	3753	457	594	129.377	130.304	112.612	108.532	129.84	110.572	93.3453	94.0147	81.2496	78.3058	93.68	79.7777	-0.229103	3527.2	525.614	3333.76	3720.63	454.543	596.685	-0.240384	7.50295	17.494	0.0010881	0.00275879
GL4_0844	CDS	874001	874249	.	hypothetical protein	NA	NA	249	967	1004	83	153	37.8654	34.8589	20.4525	27.9552	36.3621	24.2038	152.07	139.996	82.1385	112.27	146.033	97.2042	-0.582281	986.441	117.742	932.344	1040.54	101.822	133.663	-0.560406	5.62976	20.2559	0.000605821	0.0016599
GL4_0845	CDS	874412	875038	.	hypothetical/unknown protein	NA	NA	627	2626	2977	520	646	102.828	103.362	128.136	118.033	103.095	123.085	164	164.851	204.364	188.25	164.425	196.307	0.254263	2800.66	583.707	2647.07	2954.25	504.781	662.633	0.243581	7.33885	17.8077	0.00101524	0.0025978
GL4_0846	CDS	875171	875914	.	transcriptional regulatory protein	Q6NCZ5	rpaR,RPA0321	744	1460	1681	242	337	57.17	58.3644	59.6326	61.5745	57.7672	60.6035	76.8414	78.4468	80.1513	82.7614	77.6441	81.4564	0.0682916	1569.8	289.309	1483.71	1655.89	250.19	328.428	0.0661411	6.43587	0.852994	0.372636	0.445584
GL4_0847	CDS	876023	876691	.	autoinducer synthesis protein LuxI	Q6NCZ6	rpaI,RPA0320	669	1674	1964	505	672	65.5497	68.1902	124.44	122.784	66.87	123.612	97.9817	101.929	186.009	183.533	99.9551	184.771	0.87981	1817.58	588.34	1717.91	1917.26	508.787	667.892	0.87867	6.97037	216.342	1.90801e-09	2.54071e-08
GL4_0848	CDS	876719	877747	.	phytanoyl-CoA dioxygenase family protein	Q82IZ1	ptlH,SAV_2991	1029	5532	6178	1691	2049	216.62	214.501	416.689	374.38	215.56	395.534	210.515	208.455	404.945	363.829	209.485	384.387	0.872591	5854.91	1877.54	5533.82	6175.99	1623.67	2131.41	0.865219	8.73797	215.241	1.96849e-09	2.60043e-08
GL4_0849	CDS	877744	878046	.	hypothetical protein	NA	NA	303	1769	2014	493	644	69.2697	69.9262	121.483	117.668	69.598	119.575	228.613	230.78	400.934	388.342	229.696	394.638	0.778185	1890.9	568.555	1787.2	1994.6	491.678	645.432	0.772277	6.97963	179.208	6.00384e-09	6.86831e-08
GL4_0850	CDS	878058	878378	.	transcriptional regulator, Cro/CI family	P0C5S2	R00410,SMc01110	321	2850	3381	694	957	111.599	117.389	171.012	174.857	114.494	172.935	347.661	365.696	532.749	544.725	356.678	538.737	0.593594	3111.57	824.278	2940.93	3282.21	712.823	935.733	0.589576	7.64316	100.236	1.87537e-07	1.40294e-06
GL4_0851	CDS	878599	879588	.	radical SAM domain protein	P9WJ79	mftC,Rv0693	990	741	827	183	222	29.0157	28.7135	45.0941	40.5624	28.8646	42.8282	29.3088	29.0035	45.5496	40.9721	29.1562	43.2608	0.553577	784	202.678	741.005	826.995	175.273	230.084	0.554262	5.57313	38.5131	3.27943e-05	0.000124342
GL4_0853	CDS	880357	880638	.	hypothetical protein	NA	NA	282	430	449	96	124	16.8377	15.5893	23.6559	22.6565	16.2135	23.1562	59.7083	55.2812	83.8862	80.3421	57.4948	82.1142	0.506786	439.924	110.026	415.799	464.05	95.1488	124.903	0.50643	4.70937	16.3626	0.00140629	0.00341969
GL4_0854	CDS	880658	880774	.	hypothetical protein	NA	NA	117	279	303	66	70	10.925	10.5202	16.2634	12.7899	10.7226	14.5267	93.3757	89.9161	139.004	109.316	91.6459	124.16	0.433972	291.103	68.1701	275.139	307.067	58.9525	77.3877	0.411468	4.08561	6.96288	0.0205342	0.0352363
GL4_0855	CDS	882308	883444	.	hypothetical protein	NA	NA	1137	2350	2764	582	859	92.0203	95.9663	143.414	156.951	93.9933	150.182	80.9325	84.403	126.134	138.04	82.6678	132.087	0.669621	2554.47	718.356	2414.38	2694.56	621.224	815.489	0.675747	7.38809	110.345	1.07422e-07	8.43413e-07
GL4_0856	CDS	884016	885911	.	hypothetical protein	P96587	ydaM,BSU04300	1896	1094	1205	188	278	42.8384	41.8377	46.3261	50.7944	42.338	48.5603	22.5941	22.0663	24.4336	26.7903	22.3302	25.6119	0.189877	1149.69	232.721	1086.64	1212.74	201.254	264.189	0.201437	6.02461	5.97288	0.0296518	0.0492323
GL4_0857	CDS	886119	886988	.	bacterial extracellular solute-binding protein, family 3	P30859	artI,b0863,JW0847	870	1610	1778	307	388	63.0437	61.7323	75.6496	70.8929	62.388	73.2712	72.464	70.9566	86.9536	81.486	71.7103	84.2198	0.229029	1694.26	347.67	1601.35	1787.18	300.66	394.68	0.221153	6.59625	11.3011	0.00514546	0.010483
GL4_0858	CDS	886998	887933	.	possible sterol desaturase	P9WNZ9	erg3,Rv1814,MTCY1A11.29c	936	748	802	124	206	29.2899	27.8455	30.5555	37.639	28.5677	34.0973	31.2926	29.7495	32.6448	40.2126	30.521	36.4287	0.247831	775.388	164.617	732.865	817.911	142.358	186.876	0.270173	5.47122	6.15183	0.0276968	0.0461938
GL4_0859	CDS	888032	888661	.	putative membrane protein	NA	NA	630	3432	3680	557	687	134.389	127.77	137.254	125.524	131.079	131.389	213.315	202.809	217.863	199.245	208.062	208.554	0.00338702	3559.03	622.981	3363.85	3754.21	538.744	707.217	-0.00817617	7.59333	0.0188885	0.892806	0.912823
GL4_0860	CDS	888797	889699	.	probable transcriptional regulator	Q9EXL7	nagR	903	717	747	124	200	28.076	25.9359	30.5555	36.5427	27.0059	33.5491	31.0919	28.7219	33.8378	40.4681	29.9069	37.153	0.303866	732.631	161.658	692.453	772.809	139.799	183.517	0.325819	5.40419	8.80849	0.0109546	0.0205729
GL4_0861	CDS	890086	891444	.	hypothetical protein	NA	NA	1359	4236	4600	1061	1250	165.871	159.712	261.447	228.392	162.792	244.919	122.054	117.522	192.382	168.059	119.788	180.22	0.585268	4420.83	1160.59	4178.38	4663.27	1003.66	1317.52	0.576563	8.16056	86.4141	4.38419e-07	2.89009e-06
GL4_0862	CDS	891467	891880	.	hypothetical protein	NA	NA	414	1109	1273	266	306	43.4257	44.1986	65.5466	55.9103	43.8122	60.7285	104.893	106.76	158.325	135.049	105.827	146.687	0.467274	1190.57	286.443	1125.28	1255.86	247.712	325.175	0.450646	6.15623	31.7025	8.39025e-05	0.000288247
GL4_0863	CDS	892081	893736	6.1.1.6	Lysyl-tRNA synthetase	B0T2A6	lysS,Caul_0137	1656	4084	4716	710	878	159.919	163.74	174.955	160.422	161.83	167.689	96.5697	98.8767	105.649	96.8735	97.7232	101.261	0.0507998	4396.57	795.529	4155.46	4637.68	687.961	903.096	0.0396535	7.91573	0.462432	0.508493	0.580115
GL4_0864	CDS	893977	894342	.	hypothetical protein	NA	NA	366	4858	5438	2288	2526	190.227	188.808	563.799	461.534	189.518	512.667	519.747	515.868	1540.43	1261.02	517.808	1400.73	1.43394	5147.62	2429.58	4865.32	5429.92	2101.06	2758.1	1.42281	8.90247	374.295	6.39504e-11	1.35592e-09
GL4_0865	CDS	894438	895040	.	hypothetical protein	NA	NA	603	844	883	128	197	33.049	30.6578	31.5412	35.9946	31.8534	33.7679	54.8076	50.8421	52.3071	59.6925	52.8249	55.9998	0.0826842	864.202	162.267	816.809	911.596	140.326	184.208	0.0930217	5.58136	0.836208	0.377236	0.450739
GL4_0866	CDS	895063	895485	.	phage repressor	Q5LRH4	lexA,SPO2154	423	419	432	57	105	16.407	14.9991	14.0457	19.1849	15.703	16.6153	38.7873	35.4588	33.2049	45.3544	37.123	39.2797	0.0793896	425.992	80.6869	402.63	449.353	69.7768	91.597	0.105575	4.56561	0.452626	0.512946	0.584655
GL4_0867	CDS	895877	896224	.	hypothetical protein	NA	NA	348	1284	1470	232	265	50.2783	51.0385	57.1684	48.4191	50.6584	52.7938	144.478	146.662	164.277	139.135	145.57	151.706	0.0591678	1376.52	248.854	1301.03	1452.01	215.205	282.503	0.0383857	6.23872	0.224561	0.643495	0.701669
GL4_0868	CDS	896221	897294	1.3.3.1	dihydroorotate dehydrogenase	Q8G2K8	pyrD,BR0311,BS1330_I0312	1074	1455	1630	225	275	56.9742	56.5937	55.4435	50.2462	56.784	52.8449	53.0486	52.6943	51.6234	46.7842	52.8715	49.2038	-0.101725	1542.42	250.18	1457.83	1627	216.352	284.008	-0.11809	6.3592	2.54796	0.134599	0.184472
GL4_0869	CDS	897321	897668	1.20.4.1	arsenate reductase	P76569	yfgD,b2495,JW2480	348	567	649	74	77	22.2023	22.5333	18.2348	14.0689	22.3678	16.1519	63.7998	64.7509	52.3987	40.428	64.2754	46.4134	-0.461245	607.774	75.6488	574.444	641.105	65.4199	85.8777	-0.499889	4.95877	13.6306	0.00273846	0.0060373
GL4_0870	CDS	897628	897984	.	hypothetical protein	NA	NA	357	1359	1517	121	211	53.2151	52.6703	29.8163	38.5526	52.9427	34.1844	149.062	147.536	83.519	107.99	148.299	95.7547	-0.625801	1438	165.665	1359.14	1516.86	143.265	188.066	-0.611557	6.14771	36.7632	4.12152e-05	0.000151608
GL4_0871	CDS	898177	900726	.	helicase domain protein	Q57742	MJ0294	2550	4296	4739	819	1025	168.221	164.538	201.814	187.281	166.38	194.548	65.969	64.5249	79.1429	73.4437	65.2469	76.2933	0.22249	4518.72	923.573	4270.91	4766.53	798.692	1048.45	0.21542	8.02622	14.6281	0.0021292	0.00488162
GL4_0872	CDS	900737	901438	.	ICC-like protein phosphoesterase	NA	NA	702	1518	1584	247	309	59.4412	54.9966	60.8647	56.4585	57.2189	58.6616	84.674	78.3427	86.7018	80.4252	81.5084	83.5635	0.0354946	1552.49	278.146	1467.35	1637.63	240.537	315.756	0.0253727	6.40865	0.11107	0.744277	0.78983
GL4_0873	CDS	901462	902184	.	transmembrane protein co-occuring with sulfite exporter TauE/SafE	NA	NA	723	1174	1372	195	244	45.971	47.6359	48.051	44.5821	46.8034	46.3166	63.5836	65.8865	66.4606	61.6627	64.7351	64.0617	-0.0148555	1272.22	219.599	1202.45	1341.99	189.906	249.293	-0.0283457	6.10667	0.123832	0.730589	0.777535
GL4_0874	CDS	902276	903202	.	sulfite exporter TauE/SafE	O34578	yjnA,BSU12400	927	2150	2186	263	397	84.1887	75.8981	64.8073	72.5373	80.0434	68.6723	90.8185	81.8749	69.9108	78.2495	86.3467	74.0801	-0.218322	2171.34	329.434	2052.26	2290.41	284.889	373.978	-0.214454	6.82048	7.07262	0.0197426	0.0341775
GL4_0875	CDS	903347	906262	.	hypothetical protein	Q9ZG88	podJ,CC_2045	2916	9370	10876	989	1199	366.906	377.615	243.705	219.074	372.261	231.389	125.825	129.498	83.5751	75.1281	127.661	79.3516	-0.679181	10112.8	1097.74	9558.16	10667.3	949.307	1246.17	-0.697505	8.84761	126.768	4.7609e-08	4.26049e-07
GL4_0876	CDS	906590	906994	.	uncharacterized protein sll1880	P74125	sll1880	405	374	442	86	108	14.6449	15.3463	21.1917	19.7331	14.9956	20.4624	36.1603	37.892	52.3253	48.7236	37.0262	50.5245	0.438265	407.668	97.0588	385.311	430.025	83.935	110.183	0.435387	4.57993	11.1782	0.00532946	0.0108181
GL4_0877	CDS	906998	907894	3.4.11.5	proline iminopeptidase	Q87DF8	pip,PD_0727	897	975	1078	167	242	38.1786	37.4282	41.1514	44.2167	37.8034	42.684	42.5626	41.726	45.8767	49.294	42.1443	47.5853	0.171351	1026.62	204.308	970.32	1082.92	176.682	231.933	0.176926	5.85305	4.29789	0.0587298	0.0897665
GL4_0878	CDS	907980	909824	.	sodium:solute symporter family protein	P31640	H16_A2524	1845	2540	2681	445	557	99.4602	93.0845	109.655	101.771	96.2723	105.713	53.908	50.4523	59.4336	55.1607	52.1801	57.2971	0.132538	2613.17	501.446	2469.86	2756.48	433.643	569.249	0.124402	7.19386	4.03113	0.0660539	0.0994542
GL4_0879	CDS	909828	910133	.	hypothetical protein	NA	NA	306	998	1175	207	243	39.0792	40.7961	51.008	44.3994	39.9377	47.7037	127.71	133.321	166.693	145.096	130.515	155.894	0.254565	1085.77	225.255	1026.22	1145.31	194.797	255.713	0.236922	5.95203	7.56486	0.0166043	0.0294804
GL4_0880	CDS	910339	913161	.	hypothetical protein	NA	NA	2823	7224	8096	1308	1678	282.874	281.094	322.312	306.593	281.984	314.452	100.203	99.5727	114.173	108.606	99.888	111.389	0.155752	7659.19	1494.62	7239.16	8079.23	1292.52	1696.71	0.148628	8.76491	7.13061	0.0193389	0.0335483
GL4_0881	CDS	913514	913726	.	hypothetical protein	NA	NA	213	460	532	209	407	18.0125	18.4711	51.5009	74.3644	18.2418	62.9326	84.5656	86.7187	241.788	349.129	85.6421	295.458	1.77469	495.827	306.007	468.636	523.019	264.63	347.384	1.80933	5.42961	179.853	5.87467e-09	6.74372e-08
GL4_0882	CDS	913773	914066	.	ferredoxin, 2Fe-2S	P80306	fdxE	294	866	996	373	623	33.9104	34.5812	91.913	113.831	34.2458	102.872	115.342	117.623	312.629	387.179	116.482	349.904	1.57863	930.694	495.95	879.654	981.734	428.89	563.01	1.59771	6.3142	307.159	2.19452e-10	3.94895e-09
GL4_0883	CDS	914066	915511	2.1.1.107	uroporphyrinogen-III methyltransferase	Q3ILQ9	cysG,PSHAa0213	1446	3785	4069	1216	2096	148.211	141.276	299.641	382.968	144.744	341.305	102.497	97.7012	207.221	264.846	100.099	236.034	1.22932	3930.42	1635.36	3714.87	4145.96	1414.24	1856.49	1.24093	8.36779	180.309	5.78524e-09	6.66403e-08
GL4_0884	CDS	915531	915800	.	hypothetical protein	NA	NA	270	411	504	133	214	16.0938	17.4989	32.7733	39.1007	16.7963	35.937	59.6065	64.8108	121.383	144.817	62.2086	133.1	1.08512	456.954	172.929	431.895	482.014	149.546	196.311	1.10382	4.96405	82.4969	5.70021e-07	3.57363e-06
GL4_0885	CDS	915787	917442	1.8.1.2	sulfite reductase [NADPH] hemoprotein beta-component	Q73YC1	sir1,nirA1,MAP_2035	1656	5594	6047	1288	1985	219.047	209.952	317.383	362.686	214.5	340.035	132.275	126.783	191.657	219.014	129.529	205.335	0.66062	5825.08	1624.12	5505.63	6144.53	1404.52	1843.73	0.663412	8.61731	89.1093	3.68181e-07	2.49121e-06
GL4_0886	CDS	917429	918583	1.8.4.8	phosphoadenylyl-sulfate reductase [thioredoxin]	P56891	cysH,R00944,SMc00092	1155	3352	3723	653	988	131.256	129.263	160.909	180.521	130.259	170.715	113.642	111.916	139.316	156.295	112.779	147.805	0.387195	3537.87	816.955	3343.85	3731.89	706.49	927.419	0.391474	7.74305	36.4707	4.28549e-05	0.000156773
GL4_0887	CDS	918580	919485	2.7.7.4	sulfate adenylyltransferase subunit 2	Q985Q5	cysD,mlr7575	906	2962	3428	498	656	115.985	119.02	122.715	119.86	117.503	121.288	128.018	131.369	135.447	132.296	129.694	133.871	0.045395	3192.64	576.954	3017.56	3367.73	498.941	654.967	0.0378221	7.45266	0.430782	0.523125	0.592947
GL4_0888	CDS	919485	920969	2.7.7.4	sulfate adenylyltransferase subunit 1	P13442	nodQ,RA0469,SMa0857	1485	5868	6609	743	1017	229.777	229.465	183.087	185.82	229.621	184.453	154.732	154.522	123.291	125.131	154.627	124.211	-0.313729	6237.1	878.655	5895.06	6579.15	759.848	997.463	-0.321448	8.28609	31.372	8.8142e-05	0.000301257
GL4_0889	CDS	921031	921828	.	putative sulfate permease	O34578	yjnA,BSU12400	798	5466	6050	694	853	214.035	210.056	171.012	155.855	212.046	163.434	268.215	263.229	214.301	195.307	265.722	204.804	-0.374064	5759.15	775.22	5443.32	6074.99	670.398	880.041	-0.387116	8.15168	43.071	1.87373e-05	7.55164e-05
GL4_0890	CDS	921872	921988	.	hypothetical protein	NA	NA	117	3643	3615	228	338	142.651	125.513	56.1828	61.7572	134.082	58.97	1219.24	1072.76	480.195	527.839	1146	504.017	-1.18346	3637.79	282.57	3438.29	3837.29	244.362	320.777	-1.18023	7.3221	193.412	3.7794e-09	4.6256e-08
GL4_0891	CDS	922365	922589	.	hypothetical protein	NA	NA	225	370	415	48	69	14.4883	14.4088	11.828	12.6072	14.4486	12.2176	64.3924	64.0392	52.5687	56.0322	64.2158	54.3004	-0.237932	392.472	58.4504	370.948	413.995	50.547	66.3537	-0.241117	4.38214	2.65831	0.127138	0.175183
GL4_0892	CDS	922592	922993	.	phage protein	NA	NA	402	843	957	130	138	33.0098	33.2271	32.034	25.2145	33.1185	28.6243	82.114	82.6545	79.6866	62.7226	82.3842	71.2046	-0.207684	899.801	134.226	850.456	949.147	116.077	152.375	-0.238833	5.56233	5.00128	0.0436102	0.0687723
GL4_0893	CDS	923049	923378	.	hypothetical protein	NA	NA	330	906	1010	200	228	35.4767	35.0673	49.2831	41.6587	35.272	45.4709	107.505	106.264	149.343	126.238	106.885	137.791	0.363418	958.013	214.309	905.475	1010.55	185.331	243.287	0.345627	5.8022	15.1956	0.00185333	0.00430848
GL4_0894	CDS	923644	923949	.	hypothetical protein	NA	NA	306	552	587	134	189	21.615	20.3807	33.0197	34.5329	20.9978	33.7763	70.6372	66.6035	107.908	112.852	68.6203	110.38	0.677909	569.849	161.349	538.598	601.1	139.533	183.166	0.685453	5.14379	43.2065	1.84413e-05	7.45037e-05
GL4_0896	CDS	924402	924569	.	hypothetical protein	NA	NA	168	1248	1452	200	259	48.8686	50.4135	49.2831	47.3228	49.6411	48.303	290.885	300.081	293.352	281.683	295.483	287.518	-0.0392879	1349.24	229.53	1275.24	1423.23	198.494	260.566	-0.049333	6.18543	0.403078	0.536587	0.60573
GL4_0897	CDS	924672	925961	2.5.1.7	UDP-N-acetylglucosamine 1-carboxyvinyltransferase	A7IK18	murA,Xaut_3131	1290	8682	9678	1534	1824	339.966	336.021	378.002	333.27	337.993	355.636	263.539	260.481	293.024	258.348	262.01	275.686	0.0731326	9180.28	1687.27	8676.83	9683.73	1459.13	1915.41	0.0621981	8.98894	1.01599	0.331979	0.404228
GL4_0898	CDS	926048	926605	.	hypothetical protein	NA	NA	558	2916	3316	403	551	114.183	115.132	99.3055	100.675	114.658	99.9903	204.63	206.329	177.967	180.421	205.48	179.194	-0.196447	3114.84	476.632	2944.02	3285.66	412.184	541.08	-0.202151	7.33765	11.7838	0.00449065	0.00929687
GL4_0899	CDS	926612	927910	1.1.1.23	histidinol dehydrogenase	Q8YF59	hisD,BMEI1668	1299	3203	3699	371	458	125.422	128.43	91.4202	83.6828	126.926	87.5515	96.5525	98.868	70.3774	64.4209	97.7102	67.3992	-0.529221	3448.58	414.949	3259.46	3637.71	358.842	471.057	-0.548908	7.38402	77.63	8.02258e-07	4.9004e-06
GL4_0900	CDS	927907	928416	.	hypothetical protein	A8IC17	AZC_3148	510	1328	1432	148	167	52.0012	49.7191	36.4695	30.5132	50.8602	33.4913	101.963	97.4885	71.5089	59.8297	99.7258	65.6693	-0.59534	1380.66	157.67	1304.95	1456.38	136.351	178.989	-0.624214	6.08966	47.0814	1.18856e-05	5.09232e-05
GL4_0901	CDS	928490	928873	1.20.4.1	arsenate reductase	A4INR2	arsC,GTNG_1600	384	361	387	60	82	14.1359	13.4367	14.7849	14.9825	13.7863	14.8837	36.8122	34.9913	38.5024	39.017	35.9017	38.7597	0.107618	374.212	70.9684	353.69	394.734	61.3724	80.5644	0.107381	4.37966	0.575577	0.46167	0.534759
GL4_0902	CDS	929041	929910	.	hypothetical protein	NA	NA	870	5740	6424	867	1016	224.764	223.042	213.642	185.637	223.903	199.64	258.35	256.37	245.566	213.376	257.36	229.471	-0.164797	6081.58	945.583	5748.07	6415.1	817.726	1073.44	-0.179117	8.30017	8.06381	0.0140029	0.0255003
GL4_0903	CDS	929776	933072	.	hypothetical protein	NA	NA	3297	11823	13460	2189	2557	462.96	467.332	539.404	467.199	465.146	503.301	140.418	141.745	163.604	141.704	141.082	152.654	0.112969	12634.9	2388.26	11942	13327.8	2065.33	2711.19	0.102664	9.46914	2.48878	0.138825	0.189173
GL4_0904	CDS	933329	934354	.	HlyD family secretion protein	P37626	yhiI,b3487,JW3454	1026	3253	3788	601	850	127.38	131.52	148.096	155.307	129.45	151.701	124.152	128.187	144.343	151.371	126.169	147.857	0.227177	3517.31	723.984	3324.42	3710.2	626.091	821.878	0.225592	7.66443	14.3547	0.00227893	0.00517148
GL4_0905	CDS	934426	937146	.	ABC-type multidrug transport system, permease component	P37624	rbbA,yhiG,yhiH,b3486,JW5676	2721	3719	3967	557	687	145.627	137.734	137.254	125.524	141.681	131.389	53.5196	50.6191	50.4423	46.1316	52.0694	48.287	-0.106673	3846.79	623.002	3635.83	4057.75	538.763	707.242	-0.120291	7.66598	4.0115	0.0666349	0.100193
GL4_0906	CDS	937149	938270	.	ABC-type multidrug transport system, permease component	P0AGH2	yhhJ,SF3501,S4262	1122	2129	2393	351	424	83.3664	83.0851	86.4919	77.4705	83.2258	81.9812	74.3016	74.0509	77.0872	69.0468	74.1763	73.067	-0.0214457	2260.73	387.972	2136.75	2384.71	335.512	440.431	-0.0367127	6.93086	0.326133	0.577745	0.644975
GL4_0907	CDS	938584	939393	.	hypothetical protein	NA	NA	810	2275	2350	255	321	89.0834	81.5921	62.836	58.651	85.3378	60.7435	109.98	100.731	77.5753	72.4087	105.355	74.992	-0.484973	2315.54	288.135	2188.55	2442.52	249.175	327.096	-0.500426	6.83873	45.9453	1.34779e-05	5.68894e-05
GL4_0908	CDS	939446	939727	.	hypothetical protein	NA	NA	282	610	652	109	202	23.8861	22.6375	26.8593	36.9081	23.2618	31.8837	84.7025	80.2748	95.2458	130.88	82.4886	113.063	0.450177	631.345	154.9	596.721	665.968	133.955	175.845	0.478818	5.23085	13.7358	0.00266544	0.00592735
GL4_0909	CDS	939901	940755	2.7.1.15	ribokinase	P36945	rbsK,BSU35920	855	952	968	203	200	37.278	33.609	50.0224	36.5427	35.4435	43.2825	43.6	39.3088	58.5057	42.74	41.4544	50.6229	0.282096	961.101	202.07	908.394	1013.81	174.747	229.393	0.256165	5.78075	5.06783	0.0424351	0.0671099
GL4_0910	CDS	940976	941200	.	hypothetical protein	NA	NA	225	856	1000	198	240	33.5189	34.7201	48.7903	43.8513	34.1195	46.3208	148.973	154.311	216.846	194.894	151.642	205.87	0.438573	927.489	219.183	876.625	978.353	189.546	248.82	0.42477	5.77912	24.2547	0.000282695	0.000844028
GL4_0911	CDS	941461	941610	.	hypothetical protein	NA	NA	150	1037	1207	286	313	40.6064	41.9071	70.4749	57.1893	41.2568	63.8321	270.709	279.381	469.832	381.262	275.045	425.547	0.627802	1121.41	300.171	1059.91	1182.91	259.584	340.759	0.604496	6.12276	48.8825	9.78597e-06	4.29782e-05
GL4_0912	CDS	942388	943167	.	hypothetical protein	Q04737	slr0751	780	358	454	68	123	14.0184	15.7629	16.7563	22.4738	14.8907	19.615	17.9723	20.2089	21.4824	28.8125	19.0906	25.1475	0.380151	405.266	95.1	383.041	427.491	82.2411	107.959	0.414504	4.56721	6.99553	0.0202949	0.0349337
GL4_0913	CDS	943365	943532	.	hypothetical protein	NA	NA	168	155	145	21	50	6.06942	5.03441	5.17473	9.13568	5.55192	7.1552	36.1275	29.9667	30.802	54.379	33.0471	42.5905	0.356481	150.26	35.3474	142.02	158.501	30.5679	40.1269	0.417737	3.1402	2.97947	0.108147	0.152681
GL4_0914	CDS	943565	944578	.	cobalt/zinc/cadmium efflux RND transporter, membrane fusion protein, CzcB family	P13510	czcB,Rmet_5981	1014	498	553	91	140	19.5005	19.2002	22.4238	25.5799	19.3503	24.0019	19.2312	18.9351	22.1142	25.2267	19.0832	23.6705	0.296799	525.537	115.274	496.716	554.358	99.6869	130.86	0.317201	4.91854	6.88443	0.021123	0.0362279
GL4_0915	CDS	944591	947725	.	cobalt-zinc-cadmium resistance protein CzcA	P94177	czcA	3135	5016	5293	570	803	196.414	183.773	140.457	146.719	190.094	143.588	62.6521	58.6199	44.8028	46.8003	60.636	45.8016	-0.397216	5161.33	685.04	4878.28	5444.38	592.412	777.667	-0.407417	7.99016	42.8986	1.91215e-05	7.6786e-05
GL4_0916	CDS	947765	950170	.	ferrichrome-iron receptor	P81549	bfrD,vir90,BP0856	2406	42412	50188	4368	5032	1660.75	1742.53	1076.34	919.415	1701.64	997.879	690.254	724.244	447.358	382.134	707.249	414.746	-0.768553	46226.6	4737.79	43691.5	48761.7	4097.17	5378.41	-0.780386	10.9724	121.514	6.10922e-08	5.24165e-07
GL4_0917	CDS	950549	952093	.	hypothetical protein	P0A5G0	Mb2027c	1545	3385	3866	796	956	132.548	134.228	196.147	174.674	133.388	185.41	85.7918	86.8788	126.956	113.058	86.3353	120.007	0.470451	3623.67	878.564	3424.95	3822.4	759.769	997.359	0.46179	7.81033	61.0038	3.02296e-06	1.53173e-05
GL4_0918	CDS	952245	952421	.	hypothetical protein	NA	NA	177	2002	2355	658	752	78.3934	81.7657	162.141	137.401	80.0796	149.771	442.901	461.953	916.054	776.274	452.427	846.164	0.901771	2176.52	707.348	2057.16	2295.89	611.704	802.992	0.884448	7.24913	172.92	7.45132e-09	8.13293e-08
GL4_0919	CDS	952697	952822	.	hypothetical protein	NA	NA	126	31798	38937	5147	6691	1245.13	1351.9	1268.3	1222.54	1298.51	1245.42	9882	10729.3	10065.9	9702.67	10305.7	9884.28	-0.0602241	35279.1	5922.6	33344.4	37213.8	5121.77	6723.42	-0.0684641	10.8718	1.16028	0.301112	0.371668
GL4_0920	CDS	953095	953310	.	hypothetical protein	NA	NA	216	2529	3156	341	446	99.0295	109.577	84.0277	81.4902	104.303	82.759	458.47	507.299	389.017	377.27	482.884	383.143	-0.333017	2836.56	393.522	2681.01	2992.12	340.312	446.732	-0.343551	7.1636	21.3524	0.000487028	0.00137283
GL4_0921	CDS	953509	953649	.	hypothetical protein	NA	NA	141	86	114	19	25	3.36755	3.95809	4.6819	4.56784	3.66282	4.62487	23.8833	28.0715	33.2049	32.396	25.9774	32.8005	0.325291	99.8688	21.9997	94.3919	105.346	19.025	24.9744	0.322886	2.54504	1.86757	0.195068	0.25456
GL4_0922	CDS	953638	955398	3.1.6.1	arylsulfatase	P25549	aslA,atsA,b3801,JW3773	1761	3279	3715	793	933	128.398	128.985	195.408	170.472	128.691	182.94	72.9118	73.2453	110.964	96.8039	73.0786	103.884	0.501666	3495.86	866.049	3304.15	3687.58	748.946	983.152	0.492893	7.77146	65.3739	2.07564e-06	1.1038e-05
GL4_0923	CDS	955636	956730	.	hypothetical protein	NA	NA	1095	1186	1321	382	460	46.4409	45.8652	94.1308	84.0482	46.153	89.0895	42.4117	41.886	85.9642	76.7564	42.1489	81.3603	0.932625	1253.53	421.556	1184.79	1322.28	364.555	478.557	0.933728	6.42849	186.766	4.674e-09	5.53728e-08
GL4_0924	CDS	956969	958576	3.1.6.1	arylsulfatase	P25549	aslA,atsA,b3801,JW3773	1608	24100	27414	4970	5794	943.697	951.816	1224.69	1058.64	947.756	1141.66	586.876	591.925	761.62	658.36	589.401	709.99	0.268135	25743.8	5421.74	24332	27155.6	4688.64	6154.85	0.258648	10.5771	15.168	0.00186574	0.0043343
GL4_0925	CDS	958663	959652	.	hypothetical protein	NA	NA	990	3974	4639	887	1162	155.612	161.066	218.571	212.313	158.339	215.442	157.184	162.693	220.778	214.458	159.939	217.618	0.441902	4302.04	1024.58	4066.11	4537.96	886.04	1163.12	0.436039	8.05218	59.9942	3.30786e-06	1.64848e-05
GL4_0926	CDS	959812	960219	.	hypothetical protein	NA	NA	408	3565	3866	770	887	139.597	134.228	189.74	162.067	136.912	175.903	342.149	328.99	465.049	397.223	335.569	431.136	0.360582	3717.84	831.952	3513.95	3921.73	719.46	944.445	0.346137	7.79665	28.9385	0.000128253	0.000419818
GL4_0927	CDS	960231	960650	.	hypothetical protein	NA	NA	420	2636	2933	629	733	103.219	101.834	154.995	133.929	102.527	144.462	245.76	242.462	369.037	318.879	244.111	343.958	0.492984	2784.66	683.058	2631.95	2937.38	590.699	775.418	0.478594	7.42751	58.8411	3.672e-06	1.80357e-05
GL4_0928	CDS	960805	963231	.	probable deca-heme c-type cytochrome	O15294	OGT	2427	2455	2568	463	567	96.1318	89.1611	114.09	103.599	92.6465	108.845	39.6093	36.7372	47.0088	42.6859	38.1732	44.8473	0.22697	2514.44	515.681	2376.55	2652.34	445.953	585.409	0.220341	7.17278	11.806	0.004463	0.00925143
GL4_0929	CDS	963235	963969	.	putative membrane protein	Q58492	MJ1092	735	748	905	116	162	29.2899	31.4217	28.5842	29.5996	30.3558	29.0919	39.8501	42.7506	38.8901	40.2716	41.3003	39.5808	-0.0598714	825.643	138.926	780.364	870.922	120.141	157.711	-0.0651384	5.47726	0.396104	0.540079	0.60864
GL4_0930	CDS	964061	964312	.	hypothetical protein	NA	NA	252	1923	1961	340	430	75.3	68.086	83.7813	78.5668	71.693	81.1741	298.809	270.183	332.466	311.773	284.496	322.119	0.178596	1944.75	385.2	1838.1	2051.4	333.115	437.285	0.170127	6.78042	5.58771	0.0344402	0.0561191
GL4_0931	CDS	964287	964529	.	hypothetical protein	NA	NA	243	193	214	89	87	7.55741	7.43009	21.931	15.8961	7.49375	18.9135	31.1004	30.5765	90.251	65.416	30.8385	77.8335	1.30804	203.515	88.403	192.354	214.676	76.4496	100.356	1.30219	3.82821	63.2193	2.49151e-06	1.28593e-05
GL4_0932	CDS	964590	965732	.	lipid carrier : UDP-N-acetylgalactosaminyltransferase	Q0P9C9	pglA,Cj1125c	1143	1492	1580	267	322	58.4231	54.8577	65.793	58.8338	56.6404	62.3134	51.1138	47.9945	57.5617	51.4731	49.5541	54.5174	0.13511	1537.15	294.787	1452.85	1621.45	254.927	334.646	0.123519	6.42367	2.71843	0.123288	0.170868
GL4_0933	CDS	965729	966658	5.1.3.2	UDP-glucose 4-epimerase	Q56623	galE,wbfT	930	877	943	136	161	34.3412	32.741	33.5125	29.4169	33.5411	31.4647	36.926	35.2054	36.035	31.6311	36.0657	33.833	-0.0896293	910.433	148.628	860.504	960.362	128.532	168.725	-0.108771	5.60762	1.26434	0.281291	0.350981
GL4_0934	CDS	966665	967672	.	undecaprenyl-phosphate N-acetylglucosaminyl 1-phosphate transferase	O34753	tagO,yvhI,BSU35530	1008	959	1031	182	220	37.5521	35.7964	44.8476	40.197	36.6742	42.5223	37.2541	35.5123	44.4917	39.878	36.3832	42.1848	0.208136	995.463	201.16	940.871	1050.05	173.96	228.359	0.19898	5.81494	5.27494	0.0390112	0.062557
GL4_0935	CDS	967677	969635	.	UDP-N-acetylglucosamine 4,6-dehydratase	P39853	capD	1959	4150	4667	689	933	162.504	162.039	169.78	170.472	162.271	170.126	82.9525	82.7149	86.6669	87.0198	82.8337	86.8433	0.0674024	4407.73	810.182	4166.01	4649.45	700.633	919.731	0.062326	7.92801	1.25122	0.283689	0.353179
GL4_0936	CDS	969853	970956	.	TRAP transporter solute receptor, unknown substrate 6	Q8YSQ6	all3028	1104	1183	1301	309	390	46.3234	45.1708	76.1424	71.2583	45.7471	73.7004	41.9596	40.9156	68.9696	64.5455	41.4376	66.7576	0.67504	1242.24	349.684	1174.11	1310.36	302.401	396.966	0.677138	6.30408	95.8442	2.42713e-07	1.74136e-06
GL4_0937	CDS	971157	972710	1.1.99.14	glycolate dehydrogenase, subunit GlcD	P0AEP9	glcD,gox,yghM,b2979,JW2946	1554	3952	4400	763	1013	154.751	152.768	188.015	185.089	153.759	186.552	99.5821	98.3065	120.988	119.105	98.9443	120.046	0.276363	4176.23	887.657	3947.2	4405.26	767.632	1007.68	0.271908	7.93503	24.7252	0.000259926	0.000785203
GL4_0938	CDS	972707	973942	1.1.99.14	glycolate dehydrogenase, FAD-binding subunit GlcE	P52073	glcE,gox,yghL,b4468,JW5487	1236	2401	2556	470	539	94.0173	88.7445	115.815	98.4826	91.3809	107.149	76.0658	71.7997	93.7017	79.6785	73.9328	86.6901	0.226818	2480.6	505.778	2344.56	2616.64	437.389	574.167	0.211917	7.15008	9.6347	0.00843751	0.0162832
GL4_0939	CDS	973949	975325	1.1.99.14	glycolate dehydrogenase, iron-sulfur subunit GlcF	P52074	glcF,gox,yghL,b4467,JW5486	1377	2364	2629	443	554	92.5685	91.279	109.162	101.223	91.9238	105.193	67.2247	66.2883	79.2753	73.51	66.7565	76.3927	0.191837	2496.66	498.947	2359.74	2633.58	431.482	566.412	0.182992	7.14842	9.71586	0.00822883	0.0159174
GL4_0940	CDS	975412	976926	6.1.1.21	histidyl-tRNA synthetase	B3QII5	hisS,Rpal_1369	1515	3579	4029	682	876	140.145	139.887	168.055	160.057	140.016	164.056	92.5049	92.3347	110.928	105.648	92.4198	108.288	0.226334	3803.28	779.515	3594.7	4011.85	674.113	884.917	0.219441	7.77634	15.9778	0.00153823	0.00368401
GL4_0941	CDS	976931	978109	2.4.2.17	ATP phosphoribosyltransferase regulatory subunit	A6X3C2	hisZ,Oant_3018	1179	1803	1962	332	375	70.6011	68.1208	81.81	68.5176	69.3609	75.1638	59.8822	57.7784	69.3893	58.115	58.8303	63.7522	0.114052	1883.23	354.191	1779.95	1986.51	306.299	402.083	0.0954275	6.70935	1.69068	0.216231	0.278681
GL4_0942	CDS	978106	978807	2.4.2.17	ATP phosphoribosyltransferase	Q20X96	hisG,RPC_4718	702	1235	1344	199	237	48.3596	46.6638	49.0367	43.3031	47.5117	46.1699	68.8883	66.4726	69.8529	61.6853	67.6804	65.7691	-0.0407187	1289.94	218.199	1219.2	1360.68	188.696	247.703	-0.0575252	6.11928	0.50261	0.490953	0.56358
GL4_0943	CDS	978927	979661	.	hypothetical protein	NA	NA	735	439	498	102	120	17.1902	17.2906	25.1344	21.9256	17.2404	23.53	23.388	23.5246	34.1965	29.8308	23.4563	32.0136	0.432855	468.39	111.171	442.703	494.077	96.1388	126.203	0.430946	4.78041	12.2057	0.00399668	0.00841838
GL4_0944	CDS	979683	980072	.	hypothetical protein	NA	NA	390	259	291	42	75	10.1418	10.1035	10.3495	13.7035	10.1227	12.0265	26.0046	25.9065	26.5371	35.1372	25.9556	30.8371	0.240127	274.976	58.316	259.896	290.056	50.4308	66.2012	0.268512	3.97245	2.51121	0.137204	0.187347
GL4_0945	CDS	980091	980300	.	hypothetical protein	NA	NA	210	128	168	19	36	5.01217	5.83297	4.6819	6.57769	5.42257	5.62979	23.8675	27.7761	22.2947	31.3223	25.8218	26.8085	0.052124	147.767	27.4395	139.664	155.871	23.7293	31.1498	0.0769387	3.05177	0.112914	0.742246	0.788429
GL4_0946	CDS	980461	982095	.	heat shock protein 60 family chaperone GroEL	Q89DA6	groL7,groEL7,blr7533	1635	10929	12211	1163	1504	427.953	423.967	286.581	274.801	425.96	280.691	261.745	259.307	175.279	168.074	260.526	171.677	-0.598881	11569.7	1334.43	10935.2	12204.1	1153.99	1514.86	-0.609992	9.06422	114.139	8.81886e-08	7.12573e-07
GL4_0947	CDS	982188	982475	.	heat shock protein 60 family co-chaperone GroES	B1LVA1	groS,groES,Mrad2831_0535	288	1804	2044	200	269	70.6402	70.9678	49.2831	49.1499	70.804	49.2165	245.279	246.416	171.122	170.66	245.847	170.891	-0.522127	1923.55	234.447	1818.06	2029.03	202.747	266.148	-0.530315	6.57159	55.3559	5.08897e-06	2.40642e-05
GL4_0948	CDS	982628	983614	1.11.1.6	catalase	Q55025	srpA,Synpcc7942_B2620,pANL46	987	5811	6447	332	502	227.545	223.84	81.81	91.7222	225.692	86.7661	230.542	226.788	82.8875	92.9303	228.665	87.9089	-1.36913	6129.88	415.698	5793.71	6466.04	359.489	471.906	-1.37613	7.99536	397.137	4.41269e-11	1.02726e-09
GL4_0949	CDS	983783	983902	.	hypothetical protein	NA	NA	120	713	865	167	178	27.9193	30.0329	41.1514	32.523	28.9761	36.8372	232.661	250.274	342.928	271.025	241.467	306.977	0.34503	788.188	172.87	744.963	831.412	149.496	196.245	0.317121	5.50816	8.43928	0.0123569	0.0228027
GL4_0950	CDS	983964	985631	.	hypothetical protein	P75995	ycgG,b1168,JW5174	1668	9416	10482	1770	2245	368.708	363.936	436.156	410.192	366.322	423.174	221.048	218.187	261.484	245.918	219.617	253.701	0.207261	9949.66	2011.11	9404.01	10495.3	1739.18	2283.04	0.199388	9.16815	12.4067	0.00378378	0.00801284
GL4_0951	CDS	985683	985955	.	hypothetical protein	NA	NA	273	2224	2360	319	446	87.0864	81.9393	78.6066	81.4902	84.5129	80.0484	318.998	300.144	287.936	298.499	309.571	293.218	-0.0780393	2293.98	382.154	2168.17	2419.78	330.481	433.827	-0.0795711	6.93823	1.44876	0.25032	0.317212
GL4_0952	CDS	986108	986986	.	HAD superfamily protein	O32125	yutF,BSU32290	879	4673	5123	475	618	182.983	177.871	117.047	112.917	180.427	114.982	208.172	202.356	133.16	128.461	205.264	130.81	-0.64603	4900.03	546.623	4631.31	5168.75	472.712	620.535	-0.658087	7.84578	128.203	4.45474e-08	4.01892e-07
GL4_0953	CDS	987012	987395	.	chemotaxis regulator - transmits chemoreceptor signals to flagelllar motor components CheY	P0AE69	cheY,SF1931,S2022	384	946	1138	115	145	37.043	39.5114	28.3378	26.4935	38.2772	27.4156	96.4663	102.894	73.7963	68.9934	99.6803	71.3949	-0.475822	1040.98	130.036	983.893	1098.07	112.453	147.619	-0.494795	5.71737	24.5588	0.000267729	0.000803815
GL4_0954	CDS	987576	988013	.	hypothetical protein	Q2RQ36	phaJ,Rru_A2964	438	2885	3210	653	739	112.97	111.451	160.909	135.025	112.21	147.967	257.921	254.455	367.373	308.277	256.188	337.825	0.397715	3047.69	698.75	2880.55	3214.83	604.268	793.232	0.381157	7.51907	33.1639	6.77737e-05	0.000236994
GL4_0955	CDS	988040	989038	2.7.1.26	riboflavin kinase	P44957	ribF,HI_0963	999	2903	3157	569	700	113.674	109.611	140.21	127.899	111.643	134.055	113.788	109.721	140.351	128.028	111.755	134.189	0.261794	3031.58	635.507	2865.32	3197.83	549.577	721.437	0.251943	7.45814	18.6449	0.00084687	0.0022304
GL4_0956	CDS	989109	992834	6.1.1.5	isoleucyl-tRNA synthetase	Q3SPJ6	ileS,Nwi_2542	3726	10251	12017	1945	2402	401.404	417.231	479.278	438.878	409.318	459.078	107.731	111.978	128.631	117.788	109.854	123.209	0.164108	11119.7	2180.62	10509.9	11729.6	1885.77	2475.47	0.15573	9.30896	6.66587	0.0228707	0.0388552
GL4_0957	CDS	992839	993354	3.4.23.36	lipoprotein signal peptidase	B8IB41	lspA,Mnod_0392	516	914	1027	139	191	35.79	35.6575	34.2518	34.8983	35.7238	34.575	69.3605	69.1037	66.3794	67.6323	69.2321	67.0059	-0.0464709	970.417	164.937	917.199	1023.64	142.635	187.238	-0.0506358	5.71235	0.323612	0.579202	0.64595
GL4_0958	CDS	993389	994006	.	hypothetical protein	NA	NA	618	7916	8695	1855	2273	309.971	301.891	457.101	415.308	305.931	436.204	501.572	488.497	739.646	672.019	495.034	705.832	0.510929	8308.89	2071.46	7853.22	8764.55	1791.37	2351.55	0.50203	9.05556	73.0794	1.12354e-06	6.58499e-06
GL4_0959	CDS	994301	995683	.	peptidase M16-like	P55679	NGR_a01040,y4wA	1383	12424	14253	1276	1624	486.493	494.865	314.426	296.727	490.679	305.577	351.767	357.82	227.351	214.553	354.793	220.952	-0.680792	13328.9	1452.16	12597.9	14059.8	1255.81	1648.52	-0.692214	9.23744	140.055	2.6373e-08	2.53014e-07
GL4_0960	CDS	995685	997100	.	zinc protease	P55680	NGR_a01030,y4wB	1416	10746	11914	1274	1491	420.787	413.655	313.934	272.426	417.221	293.18	297.166	292.129	221.704	192.391	294.648	207.048	-0.506963	11332	1390.02	10710.5	11953.4	1202.07	1577.97	-0.521163	9.0643	65.4572	2.06126e-06	1.09967e-05
GL4_0961	CDS	997190	999031	.	DNA mismatch repair protein MutL	B3Q7Y9	mutL,Rpal_4855	1842	4584	5153	565	672	179.498	178.912	139.225	122.784	179.205	131.004	97.4475	97.1295	75.5835	66.6577	97.2885	71.1206	-0.446611	4867.68	620.202	4600.74	5134.63	536.342	704.063	-0.466354	7.89026	56.9424	4.37748e-06	2.0974e-05
GL4_0962	CDS	999039	999533	.	hypothetical protein	NA	NA	495	1257	1398	193	242	49.221	48.5386	47.5582	44.2167	48.8798	45.8874	99.4365	98.0579	96.0772	89.3266	98.7472	92.7019	-0.0901973	1327.56	217.593	1254.76	1400.37	188.171	247.014	-0.103015	6.14848	1.75766	0.207884	0.269174
GL4_0963	CDS	999545	1000105	.	ribosomal RNA small subunit methyltransferase D	O34331	ylbH,BSU15010	561	632	695	108	110	24.7476	24.1304	26.6129	20.0985	24.439	23.3557	44.1133	43.0133	47.4383	35.8262	43.5633	41.6322	-0.0639109	663.633	109.26	627.239	700.027	94.4862	124.033	-0.0965435	5.15794	0.608027	0.449583	0.523857
GL4_0964	CDS	1000105	1000935	4.2.1.70	ribosomal large subunit pseudouridine synthase B	Q1RJR2	RBE_0321	831	1726	1870	237	263	67.5859	64.9265	58.4005	48.0537	66.2562	53.2271	81.3309	78.1306	70.2774	57.8263	79.7307	64.0518	-0.311528	1798.81	250.417	1700.16	1897.46	216.557	284.278	-0.338545	6.52236	17.6313	0.0010555	0.00269171
GL4_0965	CDS	1000934	1001422	.	tRNA-specific adenosine-34 deaminase	A9CK16	tadA,Atu0688	489	730	775	70	102	28.585	26.908	17.2491	18.6368	27.7465	17.9429	58.4561	55.0267	35.2742	38.112	56.7414	36.6931	-0.615304	753.018	85.9387	711.722	794.314	74.3185	97.5589	-0.625038	5.24032	28.1034	0.000146634	0.000470275
GL4_0966	CDS	1001487	1001849	.	hypothetical protein	NA	NA	363	1961	2179	201	319	76.788	75.655	49.5295	58.2856	76.2215	53.9076	211.537	208.416	136.445	160.566	209.977	148.506	-0.496882	2070.15	259.515	1956.62	2183.67	224.425	294.605	-0.489736	6.68307	38.0103	3.49911e-05	0.000131771
GL4_0967	CDS	1002018	1003292	6.3.4.13	phosphoribosylamine--glycine ligase	Q986A5	purD,mlr7447	1275	1631	1857	267	365	63.866	64.4752	65.793	66.6904	64.1706	66.2417	50.091	50.5688	51.6023	52.3062	50.3299	51.9543	0.0449492	1743.48	315.848	1647.87	1839.09	273.141	358.555	0.0413748	6.58008	0.375176	0.550827	0.619076
GL4_0968	CDS	1003418	1004878	3.1.11.6	exodeoxyribonuclease VII large subunit	A7HQR0	xseA,Plav_0620	1461	2080	2222	279	352	81.4477	77.148	68.75	64.3152	79.2978	66.5326	55.7479	52.8049	47.0568	44.0213	54.2764	45.5391	-0.248222	2152.54	315.649	2034.5	2270.59	272.969	358.33	-0.263571	6.79529	15.2127	0.0018457	0.00429375
GL4_0969	CDS	1004939	1005163	.	Msl8272 protein	NA	NA	225	698	743	98	116	27.332	25.797	24.1487	21.1948	26.5645	22.6718	121.475	114.653	107.328	94.199	118.064	100.763	-0.226524	720.959	107.093	681.421	760.496	92.6122	121.573	-0.244929	5.24586	4.77685	0.0478679	0.0749541
GL4_0970	CDS	1005167	1006225	2.7.1.130	tetraacyldisaccharide 4'-kinase	A4Z0S1	lpxK,BRADO6095	1059	3355	3686	402	496	131.374	127.978	99.0591	90.6259	129.676	94.8425	124.054	120.848	93.5402	85.5769	122.451	89.5585	-0.447019	3521.65	449.533	3328.52	3714.78	388.749	510.317	-0.463672	7.43602	58.701	3.71931e-06	1.82082e-05
GL4_0971	CDS	1006215	1008224	.	3-deoxy-D-manno-octulosonic-acid transferase	Q1RGU8	waaA,kdtA,RBE_1335	2010	6271	7191	743	914	245.557	249.672	183.087	167	247.615	175.043	122.168	124.215	91.088	83.0847	123.191	87.0863	-0.495574	6726.49	830.443	6357.6	7095.37	718.154	942.731	-0.511834	8.33145	73.0968	1.12206e-06	6.58499e-06
GL4_0972	CDS	1008237	1010099	3.6.3.25	lipid A export ATP-binding/permease protein MsbA	Q2LVL0	msbA,SYNAS_22440,SYN_01564	1863	17487	19292	2320	2949	684.748	669.819	571.684	538.822	677.284	555.253	367.551	359.538	306.862	289.223	363.545	298.043	-0.285745	18395.2	2639.28	17386.4	19404	2282.41	2996.15	-0.295059	9.83767	25.7757	0.000216336	0.000668072
GL4_0973	CDS	1010263	1010520	.	uncharacterized protein, Bsl7517 homolog	NA	NA	258	2026	2467	367	508	79.3332	85.6544	90.4345	92.8185	82.4938	91.6265	307.493	331.994	350.521	359.762	319.743	355.142	0.151031	2243.18	437.127	2120.16	2366.2	378.021	496.233	0.146613	6.97895	4.46451	0.0546466	0.0844169
GL4_0974	CDS	1010572	1011408	3.1.3.25	inositol-1-monophosphatase	P54928	IMP3	837	3510	3828	1515	2008	137.443	132.908	373.32	366.889	135.176	370.104	164.209	158.791	446.021	438.338	161.5	442.18	1.44745	3670.95	1760.69	3469.63	3872.26	1522.61	1998.76	1.44598	8.39872	691.768	1.32827e-12	5.14166e-11
GL4_0975	CDS	1011667	1012635	2.5.1.39	4-hydroxybenzoate polyprenyltransferase	Q298G6	Coq2,GA21912	969	1072	1162	210	301	41.9769	40.3447	51.7473	54.9968	41.1608	53.372	43.3198	41.6354	53.4028	56.7562	42.4776	55.0795	0.367201	1117.41	255.256	1056.13	1178.69	220.742	289.771	0.375841	6.03736	22.3185	0.000404255	0.00115616
GL4_0976	CDS	1012674	1013405	.	ribosomal RNA small subunit methyltransferase E	Q9ZDZ5	rsmE,RP168	732	1046	1120	204	258	40.9588	38.8865	50.2688	47.1401	39.9226	48.7044	55.9546	53.1236	68.6732	64.399	54.5391	66.5361	0.282155	1083.57	231.089	1024.14	1142.99	199.842	262.335	0.276727	5.96132	11.7165	0.00457596	0.00944998
GL4_0977	CDS	1013645	1014469	.	cytochrome O ubiquinol oxidase subunit II	Q9I427	cyoA,PA1317	825	2354	2709	417	567	92.1769	94.0567	102.755	103.599	93.1168	103.177	111.73	114.008	124.552	125.574	112.869	125.063	0.146772	2530.1	491.685	2391.35	2668.85	425.202	558.168	0.142648	7.15282	5.77923	0.0319535	0.0526861
GL4_0978	CDS	1014474	1016513	.	cytochrome O ubiquinol oxidase subunit I	P0ABI8	cyoB,b0431,JW0421	2040	4305	4648	671	896	168.573	161.379	165.345	163.711	164.976	164.528	82.634	79.1073	81.0514	80.2507	80.8706	80.651	-0.00387461	4479.91	783.073	4234.23	4725.59	677.19	888.957	-0.0102041	7.92387	0.0325322	0.859663	0.885738
GL4_0979	CDS	1016528	1017109	.	cytochrome O ubiquinol oxidase subunit III	Q9I425	cyoC,PA1319	582	839	868	135	183	32.8532	30.137	33.2661	33.4366	31.4951	33.3513	56.4488	51.7818	57.1583	57.4512	54.1153	57.3047	0.0811599	854.317	158.954	807.466	901.168	137.461	180.446	0.0798616	5.56156	0.668487	0.428402	0.502182
GL4_0980	CDS	1017109	1017429	.	cytochrome O ubiquinol oxidase subunit IV	Q9WWR4	cyoD	321	346	390	54	70	13.5485	13.5408	13.3064	12.7899	13.5447	13.0482	42.2072	42.1833	41.4531	39.8441	42.1952	40.6486	-0.0526045	367.949	62.0079	347.77	388.127	53.6235	70.3923	-0.0628975	4.32202	0.186251	0.67317	0.726913
GL4_0981	CDS	1017633	1019015	6.3.2.2	glutamate--cysteine ligase	A2YL07	GSH1-2,OsI_025000	1383	3761	4154	560	685	147.272	144.227	137.993	125.159	145.749	131.576	106.487	104.286	99.7778	90.498	105.386	95.1379	-0.146136	3958.4	623.647	3741.32	4175.49	539.32	707.973	-0.160062	7.69344	7.45151	0.0172717	0.0305513
GL4_0982	CDS	1019012	1019824	.	hypothetical protein	NA	NA	813	1136	1299	312	382	44.483	45.1014	76.8817	69.7966	44.7922	73.3391	54.7146	55.4752	94.5654	85.8506	55.0949	90.208	0.701291	1217.12	347.323	1150.37	1283.87	300.36	394.286	0.696826	6.28116	95.4862	2.47983e-07	1.77154e-06
GL4_0983	CDS	1020040	1021128	.	NADH-dependent flavin oxidoreductase, Oye family	Q84QK0	OPR1,OPDA,OPDA2,OPDAR1,OPR11,OPR2,RRJ4,Os06g0216300,LOC_Os06g11290,OsJ_20595,OSJNBb0024N18.13,P0537F07.35	1089	2120	2530	310	427	83.014	87.8418	76.3888	78.0187	85.4279	77.2038	76.2296	80.6628	70.1459	71.6425	78.4462	70.8942	-0.144103	2322.33	368.253	2194.97	2449.69	318.459	418.046	-0.150745	6.93418	4.88481	0.0457609	0.0718915
GL4_0984	CDS	1021407	1021679	.	transcriptional regulator, HxlR family	P42406	hxlR,BSU03470	273	695	749	153	141	27.2145	26.0053	37.7016	25.7626	26.6099	31.7321	99.6868	95.2576	138.101	94.3685	97.4722	116.235	0.251612	722.322	147.53	682.709	761.935	127.582	167.478	0.214354	5.3533	2.76356	0.120493	0.167273
GL4_0985	CDS	1021861	1022367	.	signal recognition particle GTPase	NA	NA	507	1807	2087	433	551	70.7577	72.4608	106.698	100.675	71.6092	103.687	139.562	142.921	210.45	198.57	141.241	204.51	0.53087	1945.94	492.267	1839.22	2052.65	425.705	558.829	0.523047	6.91289	74.3602	1.0201e-06	6.08585e-06
GL4_0986	CDS	1022982	1023815	1.9.3.1	cytochrome c oxidase polypeptide II	Q1RI44	ctaC,coxB,RBE_0889	834	22998	26231	3847	4700	900.545	910.742	947.961	858.754	905.644	903.357	1079.79	1092.02	1136.64	1029.68	1085.9	1083.16	-0.0036435	24600.1	4292.11	23251	25949.2	3711.75	4872.47	-0.0128607	10.3778	0.0445769	0.836078	0.866803
GL4_0987	CDS	1023889	1025499	1.9.3.1	cytochrome c oxidase polypeptide I	P31833	ctaD,coxA,blr1171	1611	42372	47046	5629	6591	1659.18	1633.44	1387.07	1204.26	1646.31	1295.67	1029.91	1013.93	861.002	747.526	1021.92	804.264	-0.345159	44715.2	6153.95	42263	47167.5	5321.85	6986.06	-0.355133	11.0863	28.877	0.000129511	0.000423517
GL4_0988	CDS	1025542	1026510	.	heme O synthase, protoheme IX farnesyltransferase COX10-CtaB	A7HQW1	ctaB,Plav_0671	969	8477	9328	1244	1478	331.939	323.869	306.541	270.051	327.904	288.296	342.558	334.23	316.348	278.69	338.394	297.519	-0.185138	8905.72	1367.29	8417.33	9394.12	1182.41	1552.17	-0.197363	8.83854	10.1383	0.00723493	0.014176
GL4_0989	CDS	1026510	1026653	.	hypothetical protein	NA	NA	144	321	431	28	37	12.5696	14.9643	6.89964	6.7604	13.767	6.83002	87.2887	103.919	47.9142	46.9472	95.6039	47.4307	-0.99616	375.005	32.4987	354.44	395.571	28.1044	36.8931	-1.02156	4.21499	27.5127	0.000161486	0.000513455
GL4_0990	CDS	1026671	1027279	.	cytochrome oxidase biogenesis protein Cox11-CtaG, copper delivery to Cox1	A1BA38	ctaG,Pden_4318	609	5626	6937	906	1238	220.3	240.853	223.253	226.199	230.577	224.726	361.741	395.489	366.589	371.428	378.615	369.008	-0.0369812	6266.13	1070.26	5922.49	6609.76	925.548	1214.98	-0.0435581	8.39421	0.452374	0.513061	0.584655
GL4_0991	CDS	1027339	1028226	1.9.3.1	cytochrome c oxidase polypeptide III	P06030	ctaE,coiII	888	14871	18021	1999	2478	582.312	625.69	492.585	452.764	604.001	472.675	655.757	704.606	554.713	509.87	680.181	532.291	-0.353116	16410.1	2245.5	15510.2	17310.1	1941.88	2549.13	-0.363426	9.64758	32.0374	7.98465e-05	0.000275165
GL4_0992	CDS	1028385	1028720	.	conserved hypothetical protein in cyt c oxidase gene clusters	NA	NA	336	1176	1329	170	199	46.0493	46.143	41.8907	36.36	46.0961	39.1253	137.051	137.33	124.675	108.214	137.191	116.444	-0.234684	1252.29	184.676	1183.61	1320.97	159.705	209.647	-0.255402	6.0284	8.91861	0.010573	0.0199357
GL4_0993	CDS	1028730	1029458	.	cytochrome oxidase biogenesis protein Surf1, facilitates heme A insertion	P09925	Surf1,Surf-1	729	3294	3683	362	380	128.985	127.874	89.2025	69.4311	128.429	79.3168	176.934	175.41	122.363	95.2416	176.172	108.802	-0.690245	3488.37	372.342	3297.06	3679.67	321.996	422.689	-0.721746	7.35856	84.2777	5.05232e-07	3.25953e-06
GL4_0994	CDS	1029544	1030965	4.2.3.1	threonine synthase	P29363	thrC,PA3735	1422	6392	6996	1295	1481	250.295	242.902	319.108	270.599	246.598	294.854	176.016	170.817	224.408	190.294	173.417	207.351	0.256481	6697.26	1396.79	6329.98	7064.54	1207.92	1585.65	0.244582	8.6128	13.5445	0.00279993	0.00615651
GL4_0995	CDS	1030962	1032242	3.4.24.64	mitochondrial processing peptidase-like protein	Q1RJ61	RBE_0522	1281	4544	5077	733	861	177.932	176.274	180.623	157.316	177.103	168.97	138.901	137.606	141.001	122.807	138.254	131.904	-0.0673258	4810.37	799.94	4546.57	5074.18	691.776	908.104	-0.0821348	7.99979	1.74126	0.209889	0.271453
GL4_0996	CDS	1032258	1032860	.	ribosomal-protein-S5p-alanine acetyltransferase	O31633	yjcK,BSU11890	603	2284	2520	328	393	89.4359	87.4946	80.8243	71.8064	88.4652	76.3154	148.318	145.099	134.037	119.082	146.708	126.559	-0.211582	2402.48	360.959	2270.73	2534.23	312.152	409.766	-0.22855	6.961	12.1672	0.00403906	0.00847595
GL4_0997	CDS	1032863	1035943	.	diguanylate cyclase/phosphodiesterase (GGDEF & EAL domains) with PAS/PAC sensor(s)	Q9I310	PA1727	3081	8948	10258	1565	1858	350.382	356.158	385.64	339.482	353.27	362.561	113.723	115.598	125.167	110.186	114.661	117.676	0.0371329	9596.36	1720.13	9070.09	10122.6	1487.54	1952.72	0.0260774	9.03722	0.173961	0.683464	0.735992
GL4_0998	CDS	1035989	1036594	.	UPF0301 protein YqgE	A7IIJ3	Xaut_2594	606	2818	3201	950	1285	110.346	111.139	234.095	234.787	110.742	234.441	182.089	183.398	386.295	387.437	182.743	386.866	1.07787	3008.38	1116.26	2843.4	3173.36	965.323	1267.19	1.07568	7.85154	395.2	4.54999e-11	1.04462e-09
GL4_0999	CDS	1036819	1037625	.	putative thiol:disulfide interchange protein	NA	NA	807	2671	2677	454	506	104.59	92.9456	111.873	92.4531	98.7677	102.163	129.603	115.174	138.628	114.564	122.389	126.596	0.0483709	2679.32	481.435	2532.39	2826.26	416.337	546.532	0.0295873	7.19778	0.135236	0.719019	0.766497
GL4_1000	CDS	1037636	1037821	.	hypothetical protein	NA	NA	186	1163	1269	200	273	45.5402	44.0598	49.2831	49.8808	44.8	49.582	244.84	236.88	264.963	268.176	240.86	266.57	0.145741	1216.36	236.407	1149.65	1283.07	204.441	268.373	0.142798	6.08948	3.39371	0.0885109	0.128054
GL4_1001	CDS	1037984	1038469	.	peroxiredoxin	Q69TY4	PRXIIE-1,Os06g0625500,LOC_Os06g42000,OSJNBa0029G06.40,OSJNBa0072A21.9	486	2782	3072	625	880	108.936	106.66	154.01	160.788	107.798	157.399	224.149	219.465	316.893	330.839	221.807	323.866	0.54405	2927.63	751.048	2767.07	3088.18	649.495	852.601	0.543259	7.53062	90.2867	3.41641e-07	2.34017e-06
GL4_1002	CDS	1038508	1038951	3.1.26.4	ribonuclease HI	A5EAL2	rnhA,BBta_0950	444	769	915	173	217	30.1122	31.7689	42.6299	39.6488	30.9405	41.1394	67.8202	71.5515	96.0133	89.2992	69.6858	92.6562	0.405954	841.348	195.092	795.208	887.488	168.713	221.472	0.397413	5.62729	18.9893	0.000787159	0.00208801
GL4_1003	CDS	1038963	1039931	2.7.1.39	homoserine kinase	Q2J0F9	thrB,RPB_1341	969	1419	1644	237	315	55.5646	57.0798	58.4005	57.5548	56.3222	57.9776	57.3422	58.9059	60.2688	59.396	58.124	59.8324	0.0410965	1530.69	275.963	1446.74	1614.63	238.648	313.277	0.0344093	6.39021	0.227919	0.641047	0.699687
GL4_1004	CDS	1039932	1040924	1.17.1.2	4-hydroxy-3-methylbut-2-enyl diphosphate reductase	Q89UU5	ispH1,blr1314	993	3210	3647	673	910	125.696	126.624	165.838	166.269	126.16	166.054	126.582	127.517	167.007	167.441	127.049	167.224	0.393685	3427.2	790.801	3239.25	3615.15	683.873	897.73	0.390384	7.69579	50.3203	8.41378e-06	3.75966e-05
GL4_1005	CDS	1041154	1041816	.	hypothetical protein	NA	NA	663	1257	1309	427	545	49.221	45.4486	105.219	99.5789	47.3348	102.399	74.2399	68.5499	158.702	150.194	71.3949	154.448	1.10247	1284.15	486.229	1213.72	1354.57	420.484	551.975	1.10482	6.5491	271.47	4.72024e-10	7.59115e-09
GL4_1006	CDS	1041833	1042612	.	predicted periplasmic protein	P27840	yigE,b4482,JW5591	780	410	485	137	138	16.0546	16.8392	33.7589	25.2145	16.4469	29.4867	20.5828	21.5888	43.2807	32.3262	21.0858	37.8035	0.813067	447.143	138.084	422.621	471.664	119.413	156.755	0.810562	4.82435	36.8367	4.08148e-05	0.000150302
GL4_1007	CDS	1042622	1044109	.	trehalose synthase	O58762	treT,PH1035	1488	1867	2030	332	418	73.1072	70.4817	81.81	76.3743	71.7944	79.0921	49.1312	47.3668	54.9798	51.3268	48.249	53.1533	0.136957	1949.3	375.213	1842.4	2056.2	324.479	425.948	0.128864	6.76978	4.04432	0.065667	0.0990239
GL4_1008	CDS	1044171	1044662	3.6.3.14	ATP synthase F0 sector subunit b	A7HQY4	atpF1,Plav_0694	492	4091	4557	1100	1228	160.194	158.219	271.057	224.372	159.206	247.715	325.597	321.584	550.929	456.041	323.59	503.485	0.636192	4324.19	1171.71	4087.05	4561.33	1013.28	1330.14	0.622209	8.15062	80.9387	6.3469e-07	3.94932e-06
GL4_1009	CDS	1044666	1045151	3.6.3.14	ATP synthase F0 sector subunit b'	Q57EX8	atpF,BruAb1_0409	486	10533	11725	2531	2963	412.447	407.093	623.678	541.38	409.77	582.529	848.655	837.639	1283.29	1113.95	843.147	1198.62	0.50701	11129.8	2764.8	10519.4	11740.1	2390.96	3138.64	0.496865	9.48185	59.2973	3.52265e-06	1.74146e-05
GL4_1010	CDS	1045190	1045417	3.6.3.14	ATP synthase C chain	Q4FPE8	atpE,SAR11_0117	228	5313	6061	1268	1370	208.044	210.438	312.455	250.318	209.241	281.386	912.474	922.975	1370.42	1097.88	917.725	1234.15	0.426982	5683.96	1330.46	5372.24	5995.67	1150.56	1510.36	0.411065	8.45062	29.5082	0.000117237	0.000389115
GL4_1011	CDS	1045456	1046181	3.6.3.14	ATP synthase A chain	Q4FPE9	atpB,SAR11_0116	726	5833	7187	1651	1960	228.406	249.533	406.832	358.119	238.97	382.475	314.609	343.709	560.375	493.276	329.159	526.826	0.6769	6493.98	1814.59	6137.84	6850.11	1569.23	2059.95	0.666571	8.77962	95.6557	2.45471e-07	1.75736e-06
GL4_1012	CDS	1046259	1046660	.	ATP synthase protein I	P15011	atpI	402	8353	9663	2742	3364	327.083	335.5	675.672	614.648	331.292	645.16	813.639	834.577	1680.78	1528.98	824.108	1604.88	0.960705	8999.66	3064.84	8506.11	9493.21	2650.43	3479.25	0.951972	9.43324	249.711	7.90646e-10	1.17503e-08
GL4_1013	CDS	1046880	1050329	.	chromosome partition protein smc	Q6N1B7	smc,RPA4489	3450	13581	15124	2708	3336	531.799	525.106	667.294	609.532	528.452	638.413	154.145	152.205	193.418	176.676	153.175	185.047	0.271104	14353.3	3033.07	13566.2	15140.5	2622.95	3443.19	0.263509	9.73183	19.6018	0.000692597	0.00186996
GL4_1014	CDS	1050450	1051073	.	periplasmic thiol:disulfide interchange protein DsbA	Q68XQ3	RT0103	624	1747	2085	388	538	68.4082	72.3913	95.6093	98.2999	70.3998	96.9546	109.629	116.012	153.22	157.532	112.82	155.376	0.458262	1913.98	462.586	1809.02	2018.95	400.037	525.134	0.457219	6.86116	47.941	1.08247e-05	4.71667e-05
GL4_1015	CDS	1051220	1051942	.	periplasmic thiol:disulfide interchange protein DsbA	Q1RGZ5	RBE_1288	723	8763	9942	1778	2118	343.138	345.187	438.127	386.987	344.162	412.557	474.603	477.437	605.985	535.252	476.02	570.618	0.261004	9348.54	1957.84	8835.86	9861.22	1693.11	2222.56	0.250561	9.10166	16.4497	0.00137828	0.00336139
GL4_1016	CDS	1052092	1052664	.	Zn-ribbon-containing, possibly RNA-binding protein and truncated derivatives	NA	NA	573	1467	1657	173	215	57.4441	57.5311	42.6299	39.2834	57.4876	40.9567	100.252	100.403	74.3977	68.5574	100.327	71.4776	-0.483418	1561.73	194.087	1476.08	1647.38	167.843	220.33	-0.502242	6.28587	41.1892	2.34703e-05	9.14901e-05
GL4_1017	CDS	1052692	1053285	.	hypothetical protein	NA	NA	594	629	639	98	127	24.6301	22.1861	24.1487	23.2046	23.4081	23.6767	41.4648	37.3504	40.6544	39.065	39.4076	39.8597	0.016053	634.814	112.514	600	669.627	97.3008	127.728	0.00982005	5.11735	0.00707661	0.934249	0.945898
GL4_1018	CDS	1053842	1054933	.	modification methylase	O30569	smeIM,ccrM,R00926,SMc00021	1092	4898	5524	807	931	191.794	191.794	198.857	170.106	191.794	184.482	175.635	175.635	182.104	155.775	175.635	168.939	-0.0557524	5209.7	873.003	4923.99	5495.4	754.96	991.047	-0.0710906	8.11834	1.20729	0.291925	0.361674
GL4_1019	CDS	1055110	1055895	.	hypothetical protein	C0LA90	pytH	786	672	685	131	166	26.3139	23.7832	32.2804	30.3304	25.0486	31.3054	33.4782	30.2586	41.0693	38.5884	31.8684	39.8288	0.312887	679.284	148.556	642.032	716.537	128.469	168.643	0.312949	5.2904	8.71249	0.0113005	0.0210988
GL4_1020	CDS	1055913	1056254	.	Rrf2 family transcriptional regulator, group III	NA	NA	342	619	726	118	145	24.2385	25.2068	29.077	26.4935	24.7226	27.7853	70.8729	73.704	85.0206	77.4663	72.2884	81.2434	0.166315	672.065	131.588	635.209	708.922	113.795	149.38	0.153425	5.23328	2.08555	0.172512	0.228985
GL4_1021	CDS	1056729	1056980	.	hypothetical protein	NA	NA	252	1442	1552	198	226	56.4652	53.8855	48.7903	41.2933	55.1754	45.0418	224.068	213.831	193.612	163.862	218.95	178.737	-0.291286	1497.77	212.263	1415.63	1579.91	183.562	240.965	-0.312793	6.26928	14.0527	0.00245876	0.00552308
GL4_1022	CDS	1057014	1057211	.	hypothetical protein	NA	NA	198	754	785	113	153	29.5248	27.2552	27.845	27.9552	28.39	27.9001	149.115	137.653	140.631	141.188	143.384	140.909	-0.0249398	770.195	132.963	727.957	812.433	114.985	150.942	-0.0281412	5.38635	0.0732131	0.79099	0.828573
GL4_1023	CDS	1057329	1057997	3.1.26.4	ribonuclease HII	Q1MKS7	rnhB,RL0930	669	1386	1558	312	378	54.2724	54.0939	76.8817	69.0657	54.1831	72.9737	81.1246	80.8578	114.92	103.237	80.9912	109.079	0.424995	1471.85	345.36	1391.14	1552.57	298.662	392.058	0.414536	6.45689	35.6641	4.77813e-05	0.000172333
GL4_1024	CDS	1058074	1059195	.	radical SAM domain protein	P65024	Mb2609c	1122	4234	4554	592	715	165.793	158.115	145.878	130.64	161.954	138.259	147.766	140.923	130.016	116.435	144.344	123.226	-0.22651	4397.68	655.027	4156.51	4638.86	566.457	743.596	-0.241059	7.81666	15.614	0.00167634	0.00395502
GL4_1025	CDS	1059307	1059996	.	glycosyl transferase, group 2 family protein	Q73WU1	MAP_2569c	690	3072	3336	537	654	120.292	115.826	132.325	119.495	118.059	125.91	174.336	167.864	191.776	173.181	171.1	182.478	0.0923604	3205.79	596.556	3029.98	3381.6	515.892	677.219	0.0800904	7.4742	1.8047	0.202269	0.262619
GL4_1026	CDS	1060039	1060680	.	hypothetical protein	NA	NA	642	489	565	87	90	19.148	19.6168	21.4382	16.4442	19.3824	18.9412	29.8256	30.5558	33.3928	25.614	30.1907	29.5034	-0.0321461	526.73	88.7344	497.844	555.616	76.7362	100.733	-0.0634239	4.8343	0.215419	0.650277	0.707442
GL4_1027	CDS	1060723	1064637	.	hypothetical protein	P09489		3915	1718	1994	324	468	67.2727	69.2318	79.8387	85.5099	68.2522	82.6743	17.1833	17.6837	20.393	21.8416	17.4335	21.1173	0.262845	1854.89	395.47	1753.17	1956.62	341.997	448.944	0.276325	6.74699	16.6792	0.00130751	0.00320995
GL4_1028	CDS	1064841	1065842	.	transcriptional regulator, AraC family	Q47129	feaR,maoB,maoR,ydbM,b1384,JW1379	1002	1357	1491	301	385	53.1368	51.7676	74.1711	70.3447	52.4522	72.2579	53.0307	51.6643	74.0231	70.2043	52.3475	72.1137	0.45472	1424.3	343.115	1346.2	1502.41	296.721	389.51	0.452497	6.42204	44.7092	1.54974e-05	6.45692e-05
GL4_1029	CDS	1066095	1066658	.	molybdenum cofactor biosynthesis protein MoaB	P0AEZ9	moaB,chlA2,b0782,JW0765	564	1405	1479	197	262	55.0164	51.351	48.5439	47.8709	53.1837	48.2074	97.5467	91.0478	86.0707	84.8776	94.2973	85.4741	-0.140166	1443.18	229.472	1364.03	1522.32	198.444	260.5	-0.146792	6.25672	3.46646	0.0855256	0.12433
GL4_1030	CDS	1066691	1067464	.	uracil-DNA glycosylase, family 4	P30314	31	774	1113	1272	232	270	43.5824	44.1639	57.1684	49.3327	43.8731	53.2505	56.308	57.0593	73.861	63.7373	56.6836	68.7992	0.275047	1192.13	251.323	1126.76	1257.51	217.34	285.305	0.260073	6.09557	10.2836	0.00692605	0.0136028
GL4_1031	CDS	1067648	1069309	1.5.5.1	electron transfer flavoprotein-ubiquinone oxidoreductase	Q9HZP5	PA2953	1662	5953	6666	782	1023	233.105	231.444	192.697	186.916	232.274	189.806	140.256	139.256	115.943	112.464	139.756	114.204	-0.28901	6308.98	902.616	5962.99	6654.97	780.569	1024.66	-0.299165	8.31	28.258	0.000143012	0.000461009
GL4_1032	CDS	1069468	1071231	.	FOG: TPR repeat	P42810	PA4667	1764	23929	26882	5075	5767	937.001	933.345	1250.56	1053.71	935.173	1152.13	531.18	529.107	708.934	597.341	530.143	653.137	0.300492	25401	5469.75	24008	26794	4730.16	6209.35	0.290706	10.5743	17.2163	0.00115771	0.00291089
GL4_1033	CDS	1071262	1072200	2.7.1.148	4-diphosphocytidyl-2-C-methyl-D-erythritol kinase	Q11KG9	ispE,Meso_0706	939	1361	1478	253	333	53.2934	51.3163	62.3432	60.8436	52.3048	61.5934	56.7555	54.6499	66.3931	64.7962	55.7027	65.5947	0.231989	1420.03	292.991	1342.16	1497.91	253.374	332.608	0.229018	6.3411	10.4203	0.00664932	0.0131213
GL4_1034	CDS	1072211	1073227	.	octaprenyl-diphosphate synthase	P0AD58	ispB,SF3227,S3445	1017	5927	6579	1035	1338	232.087	228.423	255.04	244.471	230.255	249.755	228.207	224.605	250.777	240.384	226.406	245.581	0.116788	6253.84	1187.27	5910.87	6596.8	1026.73	1347.81	0.108952	8.45362	3.85817	0.0713906	0.10624
GL4_1035	CDS	1073345	1073578	.	hypothetical protein	NA	NA	234	971	1158	204	213	38.022	40.2058	50.2688	38.918	39.1139	44.5934	162.487	171.82	214.824	166.316	167.153	190.57	0.188093	1063.61	208.964	1005.28	1121.94	180.709	237.219	0.158375	5.89945	2.46983	0.140213	0.190673
GL4_1036	CDS	1073550	1074356	2.1.1.223	tRNA (adenine37-N(6))-methyltransferase TrmN6	P37543	yabB,BSU00340	807	6727	7524	240	305	263.413	261.234	59.1398	55.7276	262.323	57.4337	326.41	323.71	73.2835	69.0553	325.06	71.1694	-2.17568	7125.12	272.651	6734.37	7515.86	235.784	309.518	-2.20158	8.08015	1089.79	7.3445e-14	5.17319e-12
GL4_1037	CDS	1074477	1074818	.	hypothetical protein	NA	NA	342	48606	53638	290	361	1903.29	1862.31	71.4605	65.9596	1882.8	68.7101	5565.18	5445.36	208.949	192.864	5505.27	200.907	-4.76932	51137.7	325.957	48333.2	53942.1	281.882	370.031	-4.78736	10.5652	4048.7	1.61045e-17	1.78707e-14
GL4_1038	CDS	1075022	1075318	.	hypothetical protein	NA	NA	297	8684	10402	1004	1205	340.044	361.158	247.401	220.17	350.601	233.786	1144.93	1216.02	833.001	741.313	1180.48	787.157	-0.584035	9525.69	1108.75	9003.3	10048.1	958.828	1258.67	-0.596829	8.79462	83.5109	5.32025e-07	3.37998e-06
GL4_1039	CDS	1075583	1077292	.	hypothetical protein	NA	NA	1710	4235	4796	691	852	165.832	166.517	170.273	155.672	166.175	162.973	96.9779	97.3786	99.575	91.0362	97.1783	95.3056	-0.027784	4513.98	773.039	4266.43	4761.53	668.512	877.565	-0.0397388	7.92391	0.472513	0.503988	0.575369
GL4_1040	CDS	1077325	1077438	.	hypothetical protein	NA	NA	114	87	90	20	18	3.40671	3.12481	4.92831	3.28884	3.26576	4.10858	29.8834	27.4106	43.2308	28.8495	28.647	36.0402	0.321205	88.5474	19.0335	83.6914	93.4034	16.4599	21.6071	0.287517	2.36867	1.28081	0.27832	0.347796
GL4_1041	CDS	1077469	1078356	.	hypothetical protein	Q2YMB3	nhaA,BAB1_0425	888	3553	3739	758	1057	139.127	129.818	186.783	193.128	134.473	189.956	156.674	146.192	210.341	217.487	151.433	213.914	0.495584	3650.71	905.67	3450.51	3850.92	783.21	1028.13	0.494902	7.83672	69.5951	1.47229e-06	8.22359e-06
GL4_1042	CDS	1078361	1078558	.	hypothetical protein	NA	NA	198	548	568	115	95	21.4583	19.721	28.3378	17.3578	20.5897	22.8478	108.375	99.601	143.12	87.6656	103.988	115.393	0.148775	558.585	105.553	527.952	589.219	91.2805	119.825	0.102199	4.95373	0.401921	0.537164	0.606176
GL4_1043	CDS	1078699	1079646	6.1.1.14	glycyl-tRNA synthetase alpha chain	Q20YB4	glyQ,RPC_4349	948	3487	4003	557	619	136.542	138.984	137.254	113.1	137.763	125.177	144.032	146.608	144.782	119.303	145.32	132.043	-0.137237	3742.73	590.423	3537.47	3947.98	510.589	670.257	-0.158212	7.61431	5.11408	0.0416407	0.0660104
GL4_1044	CDS	1079639	1081711	6.1.1.14	glycyl-tRNA synthetase beta chain	Q89S69	glyS,blr2536	2073	8134	9190	1238	1525	318.508	319.077	305.063	278.638	318.792	291.85	153.646	153.921	147.16	134.413	153.783	140.786	-0.126529	8659.28	1385.57	8184.4	9134.17	1198.22	1572.92	-0.137714	8.82162	5.55855	0.0348385	0.0566573
GL4_1045	CDS	1081715	1082140	4.4.1.5	lactoylglutathione lyase	NA	NA	426	1123	1295	164	179	43.9739	44.9625	40.4122	32.7057	44.4682	36.5589	103.225	105.546	94.8642	76.774	104.385	85.8191	-0.279591	1208.47	171.753	1142.2	1274.75	148.53	194.977	-0.308666	5.96601	10.741	0.00604899	0.0120798
GL4_1046	CDS	1082137	1082565	.	hypothetical protein	NA	NA	429	1049	1157	135	183	41.0763	40.1711	33.2661	33.4366	40.6237	33.3513	95.7489	93.639	77.5434	77.9407	94.6939	77.7421	-0.281293	1103.17	158.961	1042.67	1163.67	137.467	180.455	-0.288805	5.84082	10.8963	0.00578124	0.0116078
GL4_1047	CDS	1082692	1085379	2.7.9.1	pyruvate,phosphate dikinase	Q59754	ppdK,podA,R00932,SMc00025	2688	10813	11800	1344	1702	423.411	409.697	331.183	310.978	416.554	321.081	157.519	152.417	123.208	115.691	154.968	119.45	-0.372819	11313.1	1525.66	10692.7	11933.5	1319.37	1731.95	-0.384435	9.10981	44.3178	1.62082e-05	6.68412e-05
GL4_1048	CDS	1085713	1086834	.	cell wall hydrolyses	P0A3V0	sleB,BC_2753	1122	18766	21511	3664	4083	734.831	746.863	902.867	746.019	740.847	824.443	654.929	665.654	804.694	664.901	660.291	734.798	0.154023	20124.1	3911.68	19020.5	21227.7	3382.77	4440.6	0.142982	10.1619	3.80312	0.0731968	0.10854
GL4_1049	CDS	1086785	1087648	2.4.2.19	quinolinate phosphoribosyltransferase [decarboxylating]	P77938	nadC	864	1442	1563	174	216	56.4652	54.2675	42.8763	39.4661	55.3663	41.1712	65.3532	62.8096	49.6254	45.6784	64.0814	47.6519	-0.41975	1503.13	195.09	1420.69	1585.56	168.711	221.469	-0.439636	6.24561	30.5026	0.000100528	0.000339754
GL4_1050	CDS	1087693	1089315	1.4.3.16	L-aspartate oxidase	Q92R32	nadB,R01095,SMc02599	1623	5784	6278	421	573	226.487	217.973	103.741	104.695	222.23	104.218	139.549	134.302	63.9193	64.507	136.925	64.2131	-1.08065	6035.06	496.546	5704.09	6366.02	429.405	563.686	-1.09726	8.02912	323.351	1.59416e-10	3.01531e-09
GL4_1051	CDS	1089349	1090416	2.5.1.72	quinolinate synthetase	C3M8U4	nadA,NGR_c08490	1068	7269	7743	391	504	284.636	268.837	96.3485	92.0876	276.737	94.2181	266.513	251.72	90.214	86.2244	259.117	88.2192	-1.54373	7514.74	447.706	7102.63	7926.85	387.169	508.242	-1.56297	8.23919	595.221	3.44495e-12	1.17023e-10
GL4_1052	CDS	1090716	1092299	.	hypothetical protein	P22525	ycbB,b0925,JW0908	1584	878	1020	185	267	34.3803	35.4145	45.5869	48.7845	34.8974	47.1857	21.7048	22.3576	28.7796	30.7983	22.0312	29.789	0.418824	948.54	225.775	896.521	1000.56	195.247	256.303	0.435142	5.81527	25.847	0.000213698	0.000661152
GL4_1053	CDS	1092316	1093704	.	hypothetical protein	O07576	yhdG,BSU09460	1389	2135	2336	274	391	83.6014	81.1061	67.5179	71.441	82.3537	69.4794	60.1882	58.3917	48.609	51.4334	59.2899	50.0212	-0.240821	2236.24	332.152	2113.61	2358.88	287.24	377.064	-0.245089	6.85385	13.5021	0.00283079	0.00621953
GL4_1054	CDS	1093829	1094590	.	ABC-type multidrug transport system, permease component	P0AFN9	yadH,SF0125,S0127	762	1539	1811	189	275	60.2635	62.878	46.5726	50.2462	61.5708	48.4094	79.0859	82.5171	61.1188	65.9399	80.8015	63.5294	-0.342171	1673.69	231.779	1581.9	1765.48	200.439	263.119	-0.346113	6.41743	18.976	0.000789382	0.00209224
GL4_1055	CDS	1094587	1095513	.	ABC-type multidrug transport system, ATPase component	P36879	yadG,b0127,JW0123	927	1998	2352	279	417	78.2368	81.6616	68.75	76.1915	79.9492	72.4708	84.3978	88.0923	74.1639	82.1915	86.2451	78.1777	-0.139979	2173.09	347.417	2053.91	2292.26	300.441	394.393	-0.138945	6.84245	3.64709	0.0786238	0.115507
GL4_1056	CDS	1095599	1096003	.	hypothetical protein	NA	NA	405	510	540	82	110	19.9704	18.7488	20.2061	20.0985	19.3596	20.1523	49.3095	46.2934	49.8916	49.6259	47.8015	49.7587	0.0567315	525.404	95.9762	496.59	554.217	82.9987	108.954	0.053347	4.85526	0.186219	0.673197	0.726913
GL4_1057	CDS	1096000	1097181	.	PQQ-dependent oxidoreductase, gdhB family	P75804	yliI,b0837,JW0821	1182	2953	3207	368	533	115.632	111.347	90.681	97.3863	113.49	94.0336	97.8276	94.2024	76.7182	82.3911	96.015	79.5547	-0.26824	3081.65	449.713	2912.65	3250.65	388.905	510.521	-0.27056	7.30168	18.2472	0.000922456	0.00239911
GL4_1058	CDS	1097279	1098304	.	predicted NAD regulator in Alphaproteobacteria	NA	NA	1026	1164	1178	186	271	45.5794	40.9002	45.8333	49.5154	43.2398	47.6743	44.4244	39.8638	44.6718	48.2606	42.1441	46.4662	0.137739	1172.49	228.265	1108.19	1236.79	197.4	259.13	0.14523	6.0371	2.55983	0.133771	0.183563
GL4_1059	CDS	1098308	1098883	.	Mll1302 protein	NA	NA	576	2310	2512	410	476	90.454	87.2168	101.03	86.9716	88.8354	94.001	157.038	151.418	175.4	150.992	154.228	163.196	0.0810314	2412.1	443.91	2279.82	2544.38	383.887	503.934	0.0640897	7.05721	0.924946	0.353837	0.426475
GL4_1060	CDS	1098927	1099496	.	predicted hydrolases of HD superfamily	P42506	RCAP_rcc00048	570	597	725	116	145	23.3771	25.172	28.5842	26.4935	24.2746	27.5388	41.0124	44.1615	50.1477	46.4798	42.5869	48.3138	0.178094	660.271	130.565	624.061	696.481	112.911	148.22	0.167712	5.21123	2.3217	0.151681	0.204266
GL4_1061	CDS	1099735	1099974	.	hypothetical protein	NA	NA	240	1351	1621	319	417	52.9019	56.2812	78.6066	76.1915	54.5915	77.3991	220.424	234.505	327.527	317.465	227.465	322.496	0.501777	1484.51	368.021	1403.1	1565.92	318.259	417.783	0.493863	6.49833	48.361	1.03463e-05	4.53196e-05
GL4_1062	CDS	1099987	1100514	3.2.2.20	DNA-3-methyladenine glycosylase	P44321	tag,HI_0654	528	984	1114	141	194	38.531	38.6782	34.7446	35.4464	38.6046	35.0955	72.9754	73.2541	65.8042	67.1334	73.1148	66.4688	-0.135541	1048.81	167.436	991.29	1106.32	144.796	190.075	-0.140995	5.80201	2.59838	0.131125	0.18008
GL4_1063	CDS	1100565	1101449	.	folate-dependent protein for Fe/S cluster synthesis/repair in oxidative stress	B8JMH0	iba57,ch1073-162b20.1	885	2941	3227	422	464	115.162	112.042	103.987	84.7791	113.602	94.3832	130.127	126.601	117.5	95.7956	128.364	106.648	-0.265117	3085.03	444.405	2915.84	3254.21	384.314	504.495	-0.289268	7.29889	16.2389	0.00144722	0.00350131
GL4_1064	CDS	1101420	1101533	.	hypothetical protein	NA	NA	114	0	0	0	0	0	0	0	0	0	0	0	0	0	0	0	0	0	NA	NA	NA	NA	NA	NA	NA	NA	NA	NA	NA
GL4_1065	CDS	1101526	1102869	3.5.2.3	dihydroorotase	Q8PVF4	pyrC,MM_2011	1344	3477	3828	506	628	136.151	132.908	124.686	114.744	134.53	119.715	101.303	98.8902	92.7726	85.3751	100.096	89.0738	-0.166552	3653.56	567.753	3453.2	3853.92	490.984	644.522	-0.17991	7.57248	9.52274	0.00873563	0.0168098
GL4_1066	CDS	1102885	1103484	.	hypothetical protein	NA	NA	600	1258	1476	179	243	49.2602	51.2468	44.1084	44.3994	50.2535	44.2539	82.1003	85.4114	73.514	73.999	83.7558	73.7565	-0.181114	1366.06	210.937	1291.15	1440.98	182.415	239.458	-0.189062	6.16729	5.50869	0.0355323	0.0575886
GL4_1067	CDS	1103635	1104282	.	putative threonine efflux protein	P94381	ycgF,BSU03090	648	1545	1889	236	316	60.4984	65.5862	58.1541	57.7375	63.0423	57.9458	93.3618	101.213	89.744	89.101	97.2875	89.4225	-0.120326	1714.68	275.942	1620.64	1808.71	238.63	313.253	-0.129437	6.50683	2.68673	0.1253	0.173224
GL4_1068	CDS	1104310	1104570	.	hypothetical protein	NA	NA	261	524	582	89	122	20.5186	20.2071	21.931	22.2911	20.3628	22.111	78.6152	77.4217	84.0268	85.4063	78.0185	84.7166	0.117384	553.038	105.448	522.709	583.367	91.1902	119.707	0.115163	4.94301	0.9695	0.342888	0.415384
GL4_1069	CDS	1104661	1105248	.	hypothetical protein	NA	NA	588	4318	4734	827	1101	169.082	164.365	203.786	201.168	166.724	202.477	287.555	279.532	346.574	342.122	283.543	344.348	0.279402	4527.88	963.504	4279.57	4776.19	833.224	1093.78	0.273564	8.0541	24.5959	0.000265967	0.000800419
GL4_1070	CDS	1105325	1105891	.	hypothetical protein	NA	NA	567	1986	2317	366	403	77.7669	80.4464	90.1881	73.6336	79.1066	81.9108	137.155	141.881	159.062	129.865	139.518	144.464	0.049904	2149.92	385.476	2032.02	2267.83	333.354	437.599	0.026474	6.87862	0.121103	0.733446	0.779828
GL4_1071	CDS	1106001	1106699	.	hypothetical protein	O64131	yoqW,SPBc2p119	699	692	786	128	191	27.097	27.29	31.5412	34.8983	27.1935	33.2197	38.7654	39.0414	45.1233	49.926	38.9034	47.5247	0.282206	738.837	159.292	698.319	779.355	137.753	180.831	0.292388	5.40701	8.5603	0.0118753	0.0220239
GL4_1072	CDS	1106725	1107609	.	hypothetical protein	Q04605		885	1210	1415	256	302	47.3806	49.1289	63.0824	55.1795	48.2548	59.1309	53.5374	55.5129	71.2796	62.3497	54.5252	66.8146	0.288455	1311.68	279.336	1239.75	1383.62	241.565	317.106	0.274659	6.23974	12.2438	0.00395535	0.00835551
GL4_1073	CDS	1107619	1108296	.	O-methyltransferase	Q00719	mdmC	678	874	911	137	165	34.2237	31.63	33.7589	30.1477	32.9268	31.9533	50.4774	46.6519	49.792	44.4657	48.5647	47.1288	-0.0424109	893.277	151.111	844.289	942.265	130.679	171.544	-0.057434	5.59234	0.336784	0.571676	0.639916
GL4_1074	CDS	1108329	1109780	.	D-2-hydroxyglutarate dehydrogenase	P46681	DLD2,AIP2,YDL178W	1452	3091	3463	477	650	121.036	120.236	117.54	118.764	120.636	118.152	83.3581	82.8069	80.9506	81.7933	83.0825	81.3719	-0.0296529	3276.74	563.026	3097.04	3456.44	486.897	639.156	-0.0349387	7.46464	0.374597	0.55113	0.619208
GL4_1075	CDS	1109790	1110791	.	TsaC protein (YrdC-Sua5 domains)	Q9UYB2	sua5,PYRAB15960,PAB1302	1002	613	695	116	135	24.0036	24.1304	28.5842	24.6663	24.067	26.6253	23.9557	24.0823	28.5272	24.6171	24.019	26.5721	0.140188	653.864	125.654	618.005	689.722	108.664	142.645	0.126479	5.18705	1.34141	0.26775	0.336101
GL4_1076	CDS	1110838	1111791	3.5.1.48	acetylspermidine deacetylase	P72702	slr0245	954	1546	1747	238	352	60.5376	60.656	58.6469	64.3152	60.5968	61.481	63.4566	63.5807	61.4748	67.4163	63.5186	64.4455	0.0205793	1646.2	294.605	1555.92	1736.48	254.77	334.44	0.0237573	6.49176	0.104006	0.752234	0.796244
GL4_1077	CDS	1111822	1112079	3.1.11.6	exodeoxyribonuclease VII small subunit	Q6G0D5	xseB,BQ03530	258	823	924	141	189	32.2267	32.0813	34.7446	34.5329	32.154	34.6387	124.91	124.346	134.669	133.848	124.628	134.259	0.106564	873.435	164.968	825.535	921.334	142.662	187.275	0.101514	5.59883	1.25244	0.283465	0.353164
GL4_1078	CDS	1112230	1114173	2.2.1.7	1-deoxy-D-xylulose 5-phosphate synthase	B0CKC0	dxs,BSUIS_A0462	1944	10026	11398	1447	1606	392.594	395.739	356.563	293.438	394.166	325.001	201.951	203.57	183.417	150.945	202.761	167.181	-0.276856	10706.9	1539.03	10119.7	11294	1330.93	1747.13	-0.292387	9.06537	16.4298	0.00138463	0.00337441
GL4_1079	CDS	1114170	1114658	.	hypothetical protein	NA	NA	489	580	663	79	130	22.7114	23.0194	19.4668	23.7528	22.8654	21.6098	46.4445	47.0744	39.8095	48.5742	46.7595	44.1918	-0.079726	621.293	104.273	587.221	655.365	90.1736	118.372	-0.0688408	5.06961	0.307485	0.588699	0.654788
GL4_1080	CDS	1114773	1115201	.	hypothetical protein	NA	NA	429	409	480	75	123	16.0154	16.6656	18.4812	22.4738	16.3405	20.4775	37.332	38.8476	43.0797	52.3864	38.0898	47.733	0.318107	444.174	98.708	419.815	468.533	85.3612	112.055	0.336016	4.67977	5.97413	0.0296376	0.0492323
GL4_1081	CDS	1115212	1115652	.	conserved hypothetical protein, conserved	Q9VW15	ash1,KMT2H,CG8887	441	527	540	107	178	20.636	18.7488	26.3665	32.523	19.6924	29.4447	46.7937	42.5144	59.7879	73.7483	44.654	66.7681	0.569864	534.106	142.058	504.816	563.397	122.85	161.267	0.595209	5.02005	22.4779	0.000392221	0.00113148
GL4_1082	CDS	1115892	1116638	.	RNA binding methyltransferase FtsJ like	P9WJ63	tlyA,Rv1694	747	412	454	76	127	16.1329	15.7629	18.7276	23.2046	15.9479	20.9661	21.5969	21.1016	25.0704	31.0637	21.3493	28.0671	0.379158	433.08	101.168	409.329	456.83	87.4887	114.848	0.407994	4.66116	8.77113	0.0110877	0.0207832
GL4_1083	CDS	1116628	1117854	.	RNA methyltransferase	Q8UHE7	Atu0735,AGR_C_1331	1227	634	641	138	143	24.8259	22.2556	34.0054	26.128	23.5407	30.0667	20.233	18.1382	27.7142	21.2942	19.1856	24.5042	0.337411	638.316	140.869	603.311	673.322	121.822	159.917	0.326035	5.20318	6.99693	0.0202847	0.0349337
GL4_1084	CDS	1117875	1118582	.	NAD-dependent protein deacetylase of SIR2 family	Q9CM50	cobB,PM0993	708	401	399	65	78	15.7022	13.8533	16.017	14.2517	14.7777	15.1343	22.1782	19.5668	22.6229	20.1295	20.8725	21.3762	0.0328446	400.66	71.5707	378.688	422.633	61.8932	81.2481	0.021096	4.45928	0.0203335	0.88881	0.909106
GL4_1085	CDS	1118572	1118931	.	hypothetical protein	NA	NA	360	273	290	35	49	10.69	10.0688	8.62455	8.95296	10.3794	8.78876	29.6945	27.9689	23.9571	24.8693	28.8317	24.4132	-0.231268	281.683	41.9783	266.235	297.131	36.3022	47.6544	-0.240114	3.91112	2.00421	0.180519	0.238187
GL4_1086	CDS	1119117	1119602	.	hypothetical protein	P40761	yuxK,yugD,BSU31500	486	516	569	52	88	20.2053	19.7557	12.8136	16.0788	19.9805	14.4462	41.5747	40.6496	26.3655	33.0839	41.1122	29.7247	-0.454838	542.599	69.8395	512.843	572.356	60.3961	79.2828	-0.45152	4.80637	9.96508	0.0076246	0.0148348
GL4_1087	CDS	1119599	1120744	4.2.3.5	chorismate synthase	Q11KE5	aroC,Meso_0730	1146	2877	3290	454	558	112.656	114.229	111.873	101.954	113.443	106.913	98.3039	99.6763	97.6202	88.9652	98.9901	93.2927	-0.0846391	3082.01	506.67	2912.99	3251.03	438.161	575.18	-0.0986998	7.35569	2.71196	0.123695	0.171284
GL4_1088	CDS	1120947	1121390	.	hypothetical protein	NA	NA	444	1040	1237	577	563	40.7239	42.9487	142.182	102.868	41.8363	122.525	91.7204	96.7313	320.229	231.684	94.2259	275.957	1.54023	1137.63	573.231	1075.24	1200.02	495.722	650.741	1.51703	6.58786	222.73	1.59654e-09	2.19623e-08
GL4_1089	CDS	1121434	1122252	1.3.1.9	enoyl-[acyl-carrier-protein] reductase [NADH]	P58380	fabI1,R00898,SMc00005	819	4089	4779	953	1128	160.115	165.927	234.834	206.101	163.021	220.467	195.501	202.597	286.733	251.649	199.049	269.191	0.433626	4429.25	1044.64	4186.35	4672.15	903.387	1185.89	0.421971	8.08855	45.4731	1.42111e-05	5.97334e-05
GL4_1090	CDS	1122368	1122556	.	hypothetical protein	NA	NA	189	1606	1832	456	549	62.887	63.6072	112.366	100.31	63.2471	106.338	332.736	336.546	594.527	530.739	334.641	562.633	0.747838	1718.44	503.255	1624.2	1812.68	435.208	571.303	0.734239	6.81756	133.783	3.46209e-08	3.20147e-07
GL4_1091	CDS	1122565	1122900	.	hypothetical protein	P22882	omp,RT0821	336	2304	2490	727	735	90.219	86.453	179.144	134.294	88.336	156.719	268.509	257.3	533.167	399.686	262.905	466.427	0.824723	2398.42	735.959	2266.89	2529.95	636.446	835.472	0.801608	7.35542	85.5095	4.65381e-07	3.03857e-06
GL4_1092	CDS	1123170	1123778	1.4.3.5	pyridoxamine 5'-phosphate oxidase	Q3SV02	pdxH,Nwi_0622	609	825	949	181	251	32.305	32.9493	44.6012	45.8611	32.6272	45.2312	53.0459	54.104	73.2368	75.3056	53.575	74.2712	0.463858	886.68	215.876	838.054	935.306	186.686	245.065	0.467737	5.72654	30.2343	0.000104749	0.000352586
GL4_1093	CDS	1123853	1124770	.	hypothetical protein	NA	NA	918	1675	1837	443	515	65.5889	63.7808	109.162	94.0975	64.6848	101.63	71.4476	69.4779	118.913	102.503	70.4628	110.708	0.644467	1756.46	479.975	1660.14	1852.79	415.075	544.875	0.634345	6.80702	89.384	3.61783e-07	2.46294e-06
GL4_1094	CDS	1125954	1126760	.	possible neuromedin U precursor	NA	NA	807	345	422	81	119	13.5094	14.6519	19.9597	21.7429	14.0806	20.8513	16.7402	18.156	24.7332	26.9429	17.4481	25.838	0.540807	383.013	99.8423	362.008	404.017	86.3421	113.342	0.566118	4.52463	17.4894	0.00108922	0.00275953
GL4_1095	CDS	1126805	1128739	.	hypothetical protein	NA	NA	1935	764	808	150	253	29.9164	28.0538	36.9623	46.2265	28.9851	41.5944	15.4607	14.4981	19.102	23.8897	14.9794	21.4958	0.493447	786.507	200.954	743.375	829.64	173.782	228.126	0.537333	5.57239	24.9469	0.000249942	0.000757793
GL4_1096	CDS	1128760	1130580	.	hypothetical protein	NA	NA	1821	1275	1382	263	368	49.9259	47.9831	64.8073	67.2386	48.9545	66.0229	27.4167	26.3499	35.5889	36.924	26.8833	36.2564	0.418087	1329.02	315.254	1256.13	1401.9	272.627	357.882	0.430216	6.31144	35.7204	4.74167e-05	0.000171204
GL4_1097	CDS	1130602	1132524	.	hypothetical protein	NA	NA	1923	1502	1678	296	416	58.8146	58.2603	72.939	76.0088	58.5375	74.4739	30.5848	30.2966	37.9298	39.5262	30.4407	38.728	0.337523	1589.98	355.682	1502.78	1677.17	307.589	403.776	0.345661	6.54562	26.4223	0.000193718	0.000602698
GL4_1098	CDS	1132539	1134479	.	hypothetical protein	NA	NA	1941	1341	1412	266	353	52.5103	49.0247	65.5466	64.4979	50.7675	65.0222	27.0532	25.2575	33.7695	33.2292	26.1553	33.4993	0.345333	1377.59	309.46	1302.04	1453.14	267.616	351.303	0.351678	6.33732	23.1224	0.000347614	0.00101509
GL4_1099	CDS	1134531	1135445	.	hypothetical protein	NA	NA	915	748	876	154	218	29.2899	30.4148	37.948	39.8316	29.8523	38.8898	32.0108	33.2402	41.4732	43.5318	32.6255	42.5025	0.371543	811.523	185.855	767.019	856.027	160.725	210.986	0.379508	5.56896	16.7863	0.00127593	0.00314402
GL4_1100	CDS	1135688	1136428	.	membrane protein	NA	NA	741	792	846	96	161	31.0128	29.3732	23.6559	29.4169	30.193	26.5364	41.8526	39.6399	31.9243	39.6989	40.7463	35.8116	-0.181487	819.468	128.245	774.528	864.409	110.904	145.585	-0.169695	5.44348	2.20963	0.161146	0.215961
GL4_1101	CDS	1136554	1138275	.	putative exported protein	P36682	yacH,b0117,JW0113	1722	5202	5713	1693	1969	203.698	198.356	417.182	359.763	201.027	388.472	118.291	115.189	242.266	208.922	116.74	225.594	0.9445	5459.65	1842.09	5160.24	5759.06	1593.01	2091.16	0.938552	8.67626	214.322	2.02067e-09	2.65882e-08
GL4_1102	CDS	1138340	1139260	.	putative exported protein	NA	NA	921	2733	3067	902	955	107.018	106.486	222.267	174.491	106.752	198.379	116.197	115.62	241.332	189.459	115.909	215.395	0.888286	2899.67	935.073	2740.65	3058.69	808.637	1061.51	0.87326	7.68059	127.193	4.66771e-08	4.18835e-07
GL4_1103	CDS	1139341	1139874	.	hypothetical protein	Q45585	sigW,ybbL,BSU01730	534	730	732	149	182	28.585	25.4151	36.7159	33.2539	27.0001	34.9849	53.53	47.5938	68.7564	62.2732	50.5619	65.5148	0.36737	731.976	165.627	691.834	772.119	143.231	188.022	0.362091	5.4133	11.8906	0.00435931	0.00905876
GL4_1104	CDS	1139871	1141997	.	Von Willebrand factor type A domain protein	P76481	yfbK,b2270,JW2265	2127	1969	2153	308	407	77.1012	74.7523	75.896	74.3644	75.9268	75.1302	36.2488	35.1445	35.6822	34.9621	35.6966	35.3222	-0.0147985	2061.68	357.469	1948.62	2174.74	309.134	405.804	-0.0218813	6.80265	0.119035	0.735636	0.781907
GL4_1105	CDS	1142204	1143979	.	hypothetical protein	P72958	sll0640	1776	2948	3151	491	636	115.436	109.403	120.99	116.206	112.42	118.598	64.998	61.6007	68.125	65.4312	63.2994	66.7781	0.0760149	3052.13	563.665	2884.75	3219.51	487.449	639.882	0.0691392	7.39898	1.39904	0.258197	0.325582
GL4_1108	CDS	1145381	1147294	.	hypothetical protein	NA	NA	1914	3396	3702	598	939	132.979	128.534	147.357	171.568	130.756	159.462	69.477	67.1545	76.9888	89.6385	68.3158	83.3136	0.282582	3550.79	764.514	3356.07	3745.52	661.14	867.888	0.290504	7.70491	16.8364	0.00126144	0.00311756
GL4_1109	CDS	1147420	1148610	.	probable ATP /GTP binding protein	NA	NA	1191	2270	2588	418	539	88.8876	89.8555	103.002	98.4826	89.3716	100.742	74.6328	75.4454	86.4834	82.689	75.0391	84.5862	0.170637	2428.08	478.652	2294.93	2561.24	413.931	543.373	0.163264	7.10055	7.69683	0.0158649	0.0283338
GL4_1110	CDS	1148582	1150831	.	ATP-dependent helicase	O27830	MTH_1802	2250	2894	2968	487	694	113.322	103.049	120.004	126.803	108.186	123.404	50.3653	45.7996	53.3353	56.357	48.0825	54.8461	0.18625	2935.88	589.414	2774.87	3096.88	509.716	669.111	0.189594	7.38679	8.12975	0.0136961	0.0249969
GL4_1111	CDS	1150903	1151970	.	exonuclease SbcD	Q6GH61	sbcD,SAR1356	1068	1272	1417	204	280	49.8084	49.1983	50.2688	51.1598	49.5034	50.7143	46.6371	46.0659	47.0682	47.9024	46.3515	47.4853	0.034138	1344.53	241.893	1270.8	1418.27	209.185	274.6	0.0313742	6.20247	0.173807	0.683595	0.735992
GL4_1112	CDS	1151967	1155041	.	exonuclease SbcC	Q9KM67	sbcC,VC_A0521	3075	4983	5617	826	1187	195.122	195.023	203.539	216.881	195.072	210.21	63.4543	63.422	66.1916	70.5304	63.4382	68.361	0.10621	5298.73	1003.03	5008.15	5589.32	867.402	1138.65	0.104755	8.21164	3.04611	0.104654	0.14819
GL4_1113	CDS	1155251	1157014	.	site-specific recombinases, DNA invertase Pin homologs	P17867	cisA,spoIVCA,BSU25770	1764	1500	1587	236	357	58.7363	55.1007	58.1541	65.2287	56.9185	61.6914	33.2972	31.2362	32.9672	36.9777	32.2667	34.9725	0.112812	1544.68	296.024	1459.96	1629.39	255.997	336.05	0.122511	6.42973	2.39167	0.146123	0.1975
GL4_1114	CDS	1157007	1157360	.	putative bacteriophage-related protein	NA	NA	354	272	270	21	42	10.6509	9.37442	5.17473	7.67397	10.0126	6.42435	30.0872	26.4814	14.6179	21.6779	28.2843	18.1479	-0.612942	271.418	31.4183	256.534	286.303	27.17	35.6665	-0.604213	3.8066	8.38753	0.0125697	0.0231299
GL4_1115	CDS	1157518	1158138	.	hypothetical protein	NA	NA	621	721	815	105	153	28.2326	28.2969	25.8736	27.9552	28.2647	26.9144	45.4631	45.5666	41.6645	45.0164	45.5149	43.3404	-0.0690687	767.872	128.882	725.762	809.983	111.455	146.309	-0.0687457	5.37268	0.443477	0.517165	0.588394
GL4_1116	CDS	1158631	1159974	.	DNA modification methylase	P76068	ynaK,b1365,JW1359	1344	710	709	160	255	27.8019	24.6165	39.4265	46.592	26.2092	43.0092	20.6859	18.3159	29.3352	34.6666	19.5009	32.0009	0.68682	710.433	207.023	671.473	749.394	179.03	235.015	0.726965	5.48596	44.665	1.55759e-05	6.4815e-05
GL4_1117	CDS	1159961	1160446	.	hypothetical protein	NA	NA	486	167	191	38	59	6.53931	6.63153	9.36379	10.7801	6.58542	10.0719	13.4554	13.6451	19.2671	22.1813	13.5503	20.7242	0.578257	178.953	48.4205	169.139	188.767	41.8733	54.9677	0.619557	3.43674	12.4803	0.00370908	0.00788476
GL4_1118	CDS	1160439	1161884	.	phage-related protein	Q9P9T5	XF_1569,XF_1674	1446	1027	1163	197	273	40.2148	40.3794	48.5439	49.8808	40.2971	49.2123	27.8111	27.9249	33.5711	34.4957	27.868	34.0334	0.279261	1094.8	234.869	1034.76	1154.84	203.111	266.627	0.285258	5.97859	12.9426	0.00327744	0.00708021
GL4_1119	CDS	1162329	1166081	1.7.99.4	respiratory nitrate reductase alpha chain	P09152	narG,bisD,narC,b1224,JW1215	3753	10404	11525	469	746	407.395	400.149	115.569	136.304	403.772	125.937	108.552	106.621	30.7937	36.3188	107.586	33.5563	-1.65183	10966.6	603.784	10365.2	11568	522.143	685.424	-1.67684	8.7316	480.739	1.32794e-11	3.62353e-10
GL4_1120	CDS	1166078	1167598	1.7.99.4	respiratory nitrate reductase beta chain	P19318	narY,b1467,JW1462	1521	3227	3586	160	262	126.361	124.506	39.4265	47.8709	125.434	43.6487	83.0779	81.8581	25.9214	31.4733	82.468	28.6974	-1.49089	3406.79	210.575	3219.96	3593.62	182.102	239.048	-1.5098	7.18131	348.397	1.00113e-10	1.98379e-09
GL4_1121	CDS	1167598	1168308	1.7.99.4	respiratory nitrate reductase delta chain	P0AF26	narJ,b1226,JW1217	711	1227	1336	53	99	48.0463	46.386	13.06	18.0886	47.2162	15.5743	67.5757	65.2405	18.3685	25.4411	66.4081	21.9048	-1.55727	1281.94	75.8989	1211.64	1352.25	65.6362	86.1616	-1.57159	5.85614	164.686	9.99987e-09	1.06356e-07
GL4_1122	CDS	1168305	1169051	1.7.99.4	respiratory nitrate reductase gamma chain	P11350	narI,chlI,b1227,JW1218	747	1279	1492	71	106	50.0825	51.8023	17.4955	19.3676	50.9424	18.4316	67.0449	69.3472	23.421	25.9272	68.196	24.6741	-1.43037	1384.63	88.4513	1308.69	1460.56	76.4914	100.411	-1.46203	5.97216	199.43	3.1364e-09	3.91051e-08
GL4_1123	CDS	1169057	1169890	5.2.1.8	peptidyl-prolyl cis-trans isomerase ppiD	Q0PAS1	cbf2,peb4A,Cj0596	834	1706	1837	111	160	66.8028	63.7808	27.3521	29.2342	65.2918	28.2932	80.0993	76.4757	32.7963	35.053	78.2875	33.9246	-1.18285	1772.47	135.426	1675.27	1869.67	117.115	153.738	-1.20391	6.34021	191.495	4.01537e-09	4.86079e-08
GL4_1124	CDS	1170011	1170718	.	nitric oxide -responding transcriptional regulator NnrR	P46148	etrA,SO_2356	708	3582	3939	408	513	140.262	136.762	100.538	93.732	138.512	97.1348	198.111	193.167	142.002	132.39	195.639	137.196	-0.508832	3761.69	460.899	3555.39	3967.98	398.578	523.219	-0.522775	7.51249	77.2563	8.24222e-07	5.02534e-06
GL4_1125	CDS	1170828	1172015	.	NnrS protein	NA	NA	1188	2089	2353	238	319	81.8001	81.6963	58.6469	58.2856	81.7482	58.4663	68.8553	68.7679	49.3661	49.062	68.8116	49.214	-0.475377	2220.66	278.438	2098.88	2342.44	240.789	316.087	-0.489458	6.7821	54.1552	5.71705e-06	2.66556e-05
GL4_1126	CDS	1172193	1172405	.	hypothetical protein	NA	NA	213	642	707	36	67	25.1392	24.5471	8.87096	12.2418	24.8431	10.5564	118.024	115.245	41.6477	57.4733	116.634	49.5605	-1.21823	674.635	51.403	637.637	711.632	44.4525	58.3534	-1.20754	5.01226	63.7172	2.38745e-06	1.24826e-05
GL4_1127	CDS	1172424	1173695	.	hypothetical protein	NA	NA	1272	1684	1888	164	269	65.9413	65.5515	40.4122	49.1499	65.7464	44.7811	51.8407	51.5342	31.7706	38.6399	51.6874	35.2052	-0.54126	1785.88	216.087	1687.94	1883.81	186.869	245.305	-0.540823	6.46482	38.4603	3.30171e-05	0.000125044
GL4_1128	CDS	1173734	1176517	.	nitrate/nitrite transporter	P10903	narK,b1223,JW1214	2784	3842	4276	409	618	150.443	148.463	100.784	112.917	149.453	106.85	54.0386	53.3272	36.2011	40.5593	53.6829	38.3802	-0.473619	4059.25	511.896	3836.63	4281.86	442.68	581.112	-0.481212	7.62993	52.7287	6.58302e-06	3.04373e-05
GL4_1129	CDS	1177051	1178583	2.6.1.1	transcriptional regulator, GntR family domain	P96669	ydeL,BSU05240	1533	2023	2331	315	440	79.2157	80.9325	77.6209	80.394	80.0741	79.0074	51.6737	52.7935	50.6334	52.4422	52.2336	51.5378	-0.0189813	2175.85	377.172	2056.52	2295.17	326.172	428.171	-0.0222342	6.87964	0.118157	0.736573	0.782652
GL4_1130	CDS	1178767	1180656	1.1.99.8	methanol dehydrogenase large subunit protein	P29968	xoxF	1890	3961	4248	789	963	155.103	147.491	194.422	175.953	151.297	185.188	82.0651	78.0375	102.869	93.0969	80.0513	97.9828	0.288343	4108.21	878.164	3882.91	4333.5	759.423	996.905	0.280087	7.91458	22.4477	0.000394466	0.00113695
GL4_1131	CDS	1182306	1182524	.	hypothetical protein	NA	NA	219	7555	8877	454	588	295.835	308.21	111.873	107.436	302.023	109.654	1350.85	1407.35	510.834	490.573	1379.1	500.704	-1.45986	8205.35	521.199	7755.36	8655.33	450.725	591.673	-1.47054	8.37467	536.939	6.61027e-12	1.98248e-10
GL4_1132	CDS	1182625	1183134	.	hypothetical protein	NA	NA	510	18405	23539	897	1188	720.695	817.276	221.035	217.064	768.985	219.049	1413.13	1602.5	433.402	425.615	1507.81	429.508	-1.8093	20896	1042.09	19750.1	22042	901.184	1183	-1.81959	9.58945	591.383	3.58897e-12	1.18294e-10
GL4_1133	CDS	1183321	1183734	.	nitrite-sensitive transcriptional repressor NsrR	Q65M01	nsrR,BLi01005,BL02858	414	1558	1832	120	167	61.0075	63.6072	29.5699	30.5132	62.3073	30.0415	147.361	153.64	71.4248	73.7033	150.501	72.5641	-1.04225	1693.67	143.448	1600.79	1786.56	124.052	162.845	-1.05531	6.2992	146.452	2.02093e-08	2.00827e-07
GL4_1134	CDS	1184647	1185492	.	LysR family transcriptional regulator HdfR	A1JI47	hdfR,YE0145	846	1354	1462	295	360	53.0193	50.7607	72.6926	65.7769	51.89	69.2347	62.6706	60.0009	85.9251	77.7504	61.3357	81.8378	0.410229	1408.64	327.801	1331.39	1485.89	283.477	372.124	0.402586	6.38797	31.75	8.3313e-05	0.000286518
GL4_1135	CDS	1185665	1186270	6.3.3.2	5-formyltetrahydrofolate cyclo-ligase	P44905	HI_0858	606	14574	16316	164	263	570.682	566.493	40.4122	48.0537	568.587	44.2329	941.72	934.806	66.6867	79.2965	938.263	72.9916	-3.6661	15443.7	212.772	14596.8	16290.7	184.002	241.542	-3.67529	8.9897	1950.22	1.76623e-15	3.45869e-13
GL4_1136	CDS	1186856	1188277	1.8.1.2	sulfite reductase [NADPH] flavoprotein alpha-component	O32214	cysJ,yvgR,BSU33440	1422	24496	27758	348	417	959.203	963.76	85.7526	76.1915	961.481	80.9721	674.545	677.749	60.3042	53.5806	676.147	56.9424	-3.54678	26116.3	383.485	24684.1	27548.6	331.632	435.337	-3.58346	9.69962	2409.43	4.54129e-16	1.25983e-13
GL4_1137	CDS	1188327	1190036	1.8.1.2	sulfite reductase [NADPH] hemoprotein beta-component	Q1QQC7	cysI,Nham_0683	1710	23248	26265	306	436	910.335	911.922	75.4032	79.6631	911.129	77.5331	532.36	533.288	44.0954	46.5866	532.824	45.341	-3.526	24748.4	370.175	23391.2	26105.6	320.122	420.228	-3.5568	9.62805	2427.84	4.32457e-16	1.25983e-13
GL4_1138	CDS	1190036	1190668	.	alkyl hydroperoxide reductase subunit C-like protein	Q54SE2	DDB_G0282517	633	11287	12920	140	175	441.971	448.583	34.4982	31.9749	445.277	33.2365	698.217	708.662	54.4995	50.5132	703.44	52.5064	-3.71869	12095.5	157.6	11432.2	12758.9	136.29	178.91	-3.7557	8.66375	2410.78	4.52508e-16	1.25983e-13
GL4_1139	CDS	1190687	1191862	2.5.1.48	cystathionine gamma-synthase	P00935	metB,b3939,JW3910	1176	18440	21069	333	427	722.065	731.517	82.0564	78.0187	726.791	80.0375	614.001	622.038	69.7759	66.3424	618.02	68.0591	-3.16408	19742.1	380.24	18659.5	20824.8	328.826	431.655	-3.19205	9.34805	2164.99	9.0301e-16	2.13438e-13
GL4_1140	CDS	1191884	1192618	.	hypothetical protein	NA	NA	735	3046	3342	101	174	119.274	116.034	24.888	31.7922	117.654	28.3401	162.277	157.87	33.8612	43.2546	160.074	38.5579	-2.02568	3195.05	137.276	3019.83	3370.27	118.714	155.837	-2.03435	7.0347	502.095	1.00965e-11	2.8484e-10
GL4_1141	CDS	1192840	1193007	.	hypothetical protein	NA	NA	168	384	401	58	85	15.0365	13.9227	14.2921	15.5307	14.4796	14.9114	89.503	82.8735	85.0721	92.4444	86.1882	88.7582	0.0419104	392.873	71.4142	371.327	414.418	61.7579	81.0705	0.0462418	4.43679	0.103264	0.753088	0.796444
GL4_1142	CDS	1193140	1193280	.	hypothetical protein	NA	NA	141	256	298	29	57	10.0243	10.3466	7.14605	10.4147	10.1855	8.78036	71.0946	73.38	50.6812	73.8629	72.2373	62.2721	-0.211009	276.848	42.8625	261.665	292.03	37.0668	48.6581	-0.185109	3.89637	0.957775	0.345721	0.418359
GL4_1143	CDS	1193381	1193749	.	protein of unknown function YeaO	P76243	yeaO,b1792,JW1781	369	577	623	63	103	22.5939	21.6306	15.5242	18.8195	22.1123	17.1718	61.2301	58.6195	42.071	51.0013	59.9248	46.5362	-0.358005	600.289	82.839	567.369	633.209	71.6379	94.0401	-0.351089	4.96608	7.08378	0.0196642	0.0340593
GL4_1144	CDS	1193773	1195374	1.9.3.1	cytochrome c oxidase polypeptide I	P31833	ctaD,coxA,blr1171	1602	9196	10055	702	924	360.093	349.11	172.984	168.827	354.602	170.906	224.777	217.921	107.98	105.385	221.349	106.683	-1.04604	9630.57	812.919	9102.42	10158.7	703	922.838	-1.06036	8.68092	326.35	1.50507e-10	2.86307e-09
GL4_1145	CDS	1195495	1195899	.	4Fe-4S ferredoxin, iron-sulfur binding	D5AP15	fdxA,RCAP_rcc02791	405	2391	2673	136	155	93.6257	92.8067	33.5125	28.3206	93.2162	30.9166	231.175	229.152	82.747	69.9274	230.164	76.3372	-1.57968	2531.93	145.625	2393.07	2670.78	125.934	165.315	-1.61361	6.77058	393.948	4.64141e-11	1.05509e-09
GL4_1146	CDS	1195896	1196321	.	truncated hemoglobins	Q0PB48	ctb,Cj0465c	426	1815	1846	92	110	71.071	64.0932	22.6702	20.0985	67.5821	21.3844	166.833	150.454	53.2165	47.1796	158.643	50.198	-1.64069	1833.14	101.042	1732.61	1933.67	87.3799	114.705	-1.67487	6.33011	259.467	6.24198e-10	9.57584e-09
GL4_1147	CDS	1196426	1196881	.	nitrite-sensitive transcriptional repressor NsrR	Q65M01	nsrR,BLi01005,BL02858	456	1358	1516	112	185	53.176	52.6356	27.5986	33.802	52.9058	30.7003	116.614	115.429	60.5231	74.1272	116.021	67.3252	-0.776284	1436.99	148.278	1358.19	1515.8	128.228	168.327	-0.770484	6.11812	63.6936	2.39228e-06	1.24826e-05
GL4_1148	CDS	1197019	1197162	.	hypothetical protein	NA	NA	144	312	341	32	59	12.2172	11.8395	7.8853	10.7801	12.0283	9.3327	84.8414	82.219	54.759	74.8618	83.5302	64.8104	-0.361151	326.594	45.378	308.683	344.504	39.2422	51.5138	-0.341137	4.10534	3.73514	0.0755038	0.111417
GL4_1149	CDS	1197424	1198338	.	hypothetical protein	NA	NA	915	2825	3195	869	1215	110.62	110.931	214.135	221.997	110.775	218.066	120.896	121.236	234.028	242.62	121.066	238.324	0.971302	3009.16	1039.69	2844.14	3174.19	899.105	1180.27	0.972783	7.79231	303.482	2.36509e-10	4.233e-09
GL4_1150	CDS	1198893	1199354	.	hypothetical protein	NA	NA	462	1496	1602	321	446	58.5797	55.6215	79.0994	81.4902	57.1006	80.2948	126.796	120.393	171.211	176.386	123.594	173.798	0.488452	1549.91	383.198	1464.91	1634.9	331.384	435.012	0.48997	6.56123	52.628	6.64966e-06	3.06603e-05
GL4_1151	CDS	1199608	1200165	.	hypothetical protein	NA	NA	558	788	884	156	257	30.8562	30.6925	38.4408	46.9574	30.7743	42.6991	55.2978	55.0045	68.8904	84.153	55.1512	76.5217	0.465285	835.948	206.007	790.104	881.792	178.152	233.863	0.485224	5.64529	23.1668	0.000344761	0.00100765
GL4_1152	CDS	1200133	1200882	.	hypothetical protein	NA	NA	750	1011	1074	236	318	39.5883	37.2893	58.1541	58.1029	38.4388	58.1285	52.7844	49.7191	77.5388	77.4705	51.2518	77.5047	0.587299	1043.13	276.915	985.924	1100.34	239.472	314.358	0.592543	6.01048	58.0254	3.95765e-06	1.92055e-05
GL4_1153	CDS	1201509	1201811	.	hypothetical protein	NA	NA	303	521	582	129	126	20.4011	20.2071	31.7876	23.0219	20.3041	27.4048	67.3303	66.69	104.91	75.9799	67.0102	90.4448	0.42715	551.493	127.974	521.249	581.737	110.67	145.278	0.398417	5.00943	9.28078	0.00942281	0.0179866
GL4_1154	CDS	1202681	1204555	.	hypothetical protein	P0C0F6	rpfC,XCC1856	1875	4995	5674	657	938	195.592	197.002	161.895	171.385	196.297	166.64	104.316	105.068	86.344	91.4055	104.692	88.8748	-0.233873	5332.25	795.263	5039.83	5624.68	687.731	902.794	-0.239184	8.09117	15.817	0.0015976	0.00380159
GL4_1155	CDS	1205423	1205617	.	hypothetical protein	NA	NA	195	374	429	81	93	14.6449	14.8949	19.9597	16.9924	14.7699	18.476	75.1022	76.3841	102.357	87.1403	75.7432	94.7488	0.319216	401.344	87.1488	379.334	423.353	75.365	98.9327	0.302619	4.52398	4.95063	0.0445304	0.070157
GL4_1156	CDS	1205749	1205874	.	putative exported protein	NA	NA	126	328	329	60	74	12.8437	11.4229	14.7849	13.5208	12.1333	14.1529	101.934	90.6579	117.341	107.308	96.2959	112.324	0.220006	328.975	67.0464	310.934	347.016	57.9807	76.112	0.211172	4.21621	1.92932	0.188314	0.247199
GL4_1157	CDS	1206149	1206643	1.3.99.16	isoquinoline 1-oxidoreductase alpha subunit	Q51697	iorA	495	26521	32307	3534	4046	1038.5	1121.7	870.833	739.259	1080.1	805.046	2097.97	2266.06	1759.26	1493.45	2182.02	1626.36	-0.423795	29344.8	3821.14	27735.5	30954.1	3304.46	4337.81	-0.43498	10.4502	35.0046	5.23e-05	0.00018701
GL4_1158	CDS	1206646	1208829	1.3.99.16	isoquinoline 1-oxidoreductase beta subunit	Q51698	iorB	2184	76374	85865	11112	13595	2990.62	2981.24	2738.17	2483.99	2985.93	2611.08	1369.33	1365.04	1253.74	1137.36	1367.18	1195.55	-0.193381	81103.3	12410.3	76655.5	85551	10732.2	14088.4	-0.202174	12.0095	10.6824	0.00615383	0.0122671
GL4_1159	CDS	1208925	1209938	.	carbon monoxide dehydrogenase F protein	O32147	pucA,yurF,BSU32510	1014	24655	26655	3186	3915	965.43	925.463	785.08	715.324	945.446	750.202	952.1	912.686	774.241	705.447	932.393	739.844	-0.333315	25676.9	3564.4	24268.8	27085.1	3082.44	4046.36	-0.342693	10.2959	31.6045	8.51349e-05	0.000291878
GL4_1160	CDS	1209938	1210558	.	molybdopterin biosynthesis protein MoeA	B3EMY6	kdsB,Cphamn1_2065	621	8030	9216	1177	1537	314.435	319.98	290.031	280.831	317.208	285.431	506.337	515.266	467.039	452.223	510.801	459.631	-0.151972	8616.85	1357.33	8144.29	9089.4	1173.79	1540.86	-0.160342	8.80574	8.05159	0.0140606	0.0255715
GL4_1161	CDS	1211599	1212549	.	hypothetical protein	NA	NA	951	5707	6839	928	1187	223.472	237.451	228.674	216.881	230.461	222.777	234.987	249.685	240.456	228.056	242.336	234.256	-0.0487177	6262.03	1058.61	5918.62	6605.44	915.467	1201.75	-0.0584147	8.38745	0.93482	0.351367	0.424103
GL4_1162	CDS	1212618	1214318	.	putative phage protein	NA	NA	1701	13908	16623	2215	2811	544.603	577.152	545.811	513.608	560.877	529.709	320.167	339.301	320.876	301.945	329.734	311.41	-0.0822283	15237.9	2517.73	14402.2	16073.5	2177.3	2858.17	-0.0914139	9.65257	2.23462	0.158972	0.213308
GL4_1163	CDS	1214525	1216093	.	hypothetical protein	P03014	pinE,pin,b1158,JW1144	1569	2947	3169	488	706	115.397	110.028	120.251	128.996	112.713	124.623	73.5483	70.1261	76.6417	82.2153	71.8372	79.4285	0.143031	3060.28	595.669	2892.45	3228.11	515.125	676.212	0.144957	7.43022	5.4673	0.0361207	0.0583434
GL4_1164	CDS	1216290	1216643	.	hypothetical protein	NA	NA	354	241	213	42	52	9.43697	7.39537	10.3495	9.5011	8.41617	9.92528	26.6581	20.8909	29.2358	26.8393	23.7745	28.0375	0.229062	227.646	47.0261	215.162	240.131	40.6675	53.3848	0.230586	3.69187	1.4183	0.255106	0.322173
GL4_1165	CDS	1216801	1217427	.	hypothetical protein	NA	NA	627	380	399	41	98	14.8799	13.8533	10.103	17.9059	14.3666	14.0045	23.7319	22.0946	16.1133	28.5581	22.9132	22.3357	-0.0352695	389.839	69.0821	368.46	411.218	59.7411	78.423	0.00954254	4.41898	0.00243593	0.961391	0.968959
GL4_1166	CDS	1218521	1218673	.	DNA-binding protein	NA	NA	153	597	626	70	101	23.3771	21.7348	17.2491	18.4541	22.5559	17.8516	152.791	142.057	112.739	120.615	147.424	116.677	-0.334894	612.051	85.4282	578.485	645.616	73.877	96.9794	-0.33469	4.99638	7.14165	0.0192631	0.0334517
GL4_1167	CDS	1219171	1219467	.	hypothetical protein	NA	NA	297	191	173	40	61	7.47909	6.00657	9.85663	11.1455	6.74283	10.5011	25.1821	20.2241	33.1873	37.527	22.7031	35.3572	0.617161	182.413	50.4236	172.409	192.416	43.6056	57.2416	0.650397	3.4707	11.6626	0.00464553	0.00956991
GL4_1168	CDS	1219527	1220927	.	phage-related protein	Q9P9T5	XF_1569,XF_1674	1401	1304	1408	196	260	51.0615	48.8858	48.2975	47.5055	49.9737	47.9015	36.4464	34.8935	34.4736	33.9083	35.67	34.1909	-0.0593961	1356.61	227.977	1282.22	1431.01	197.151	258.803	-0.0669893	6.18884	0.756577	0.400276	0.47378
GL4_1169	CDS	1220932	1221354	.	hypothetical protein	NA	NA	423	257	276	40	72	10.0635	9.58274	9.85663	13.1554	9.82311	11.506	23.7908	22.6542	23.3017	31.1002	23.2225	27.2009	0.219396	266.631	55.8236	252.009	281.253	48.2754	63.3718	0.249964	3.92401	2.08715	0.172359	0.228872
GL4_1170	CDS	1221351	1222676	.	DNA modification methylase	P34721	mboIBM,mboC	1326	867	864	102	143	33.9496	29.9981	25.1344	26.128	31.9739	25.6312	25.603	22.623	18.955	19.7044	24.113	19.3297	-0.304845	866.788	122.439	819.253	914.323	105.883	138.994	-0.317486	5.49314	8.00768	0.0142704	0.025889
GL4_1171	CDS	1222855	1223007	.	hypothetical protein	NA	NA	153	246	288	47	61	9.63276	9.99938	11.5815	11.1455	9.81607	11.3635	62.9592	65.3554	75.6963	72.8466	64.1573	74.2714	0.208176	266.837	54.0062	252.204	281.471	46.7037	61.3086	0.201135	3.9148	1.59479	0.228963	0.293129
GL4_1172	CDS	1223954	1224271	.	hypothetical protein	Q08385	mopA	318	1293	1321	155	200	50.6307	45.8652	38.1944	36.5427	48.248	37.3686	159.216	144.23	120.108	114.914	151.723	117.511	-0.365895	1308.58	177.524	1236.82	1380.34	153.52	201.528	-0.375799	6.06411	17.1031	0.00118755	0.00297022
GL4_1173	CDS	1224342	1225742	.	hypothetical protein	P33976	CC_0911	1401	1295	1428	164	215	50.709	49.5803	40.4122	39.2834	50.1446	39.8478	36.1949	35.3892	28.8452	28.0396	35.792	28.4424	-0.321499	1361.73	189.502	1287.05	1436.4	163.879	215.126	-0.339044	6.12807	18.0435	0.000964179	0.00249592
GL4_1174	CDS	1225824	1225955	.	hypothetical protein	NA	NA	132	179	239	31	48	7.0092	8.2981	7.63888	8.77025	7.65365	8.20457	53.1	62.8644	57.8703	66.4413	57.9822	62.1558	0.0986362	208.565	39.4471	197.128	220.003	34.1133	44.781	0.103438	3.54509	0.27842	0.606683	0.669867
GL4_1175	CDS	1226140	1226910	.	molybdenum ABC transporter, periplasmic molybdenum-binding protein ModA	Q08383	modA,molP	771	785	866	118	163	30.7387	30.0676	29.077	29.7823	30.4031	29.4297	39.8686	38.9982	37.7134	38.6282	39.4334	38.1708	-0.0457683	825.623	140.438	780.345	870.901	121.449	159.427	-0.0494912	5.481	0.260112	0.618645	0.679724
GL4_1176	CDS	1226926	1227051	.	hypothetical protein	NA	NA	126	152	169	12	30	5.95195	5.86769	2.95699	5.48141	5.90982	4.2192	47.2377	46.569	23.4682	43.5032	46.9033	33.4857	-0.474128	160.506	20.9395	151.704	169.308	18.1081	23.7708	-0.431626	3.09036	2.95292	0.109579	0.154375
GL4_1177	CDS	1227237	1227395	.	hypothetical protein	NA	NA	159	639	761	83	92	25.0217	26.422	20.4525	16.8096	25.7218	18.6311	157.369	166.176	128.632	105.721	161.772	117.177	-0.461913	699.368	87.6142	661.014	737.721	75.7675	99.461	-0.490589	5.1583	15.5526	0.00170107	0.00400768
GL4_1178	CDS	1227686	1229401	3.1.6.1	arylsulfatase	P25549	aslA,atsA,b3801,JW3773	1716	36255	42213	4338	5008	1419.66	1465.64	1068.95	915.029	1442.65	991.99	827.306	854.101	622.932	533.234	840.704	578.083	-0.539543	39189.1	4709.93	37039.9	41338.2	4073.08	5346.78	-0.550623	10.8194	63.3096	2.47227e-06	1.27997e-05
GL4_1179	CDS	1229557	1230573	.	transcriptional regulator, AraC family	Q9I1P2	vqsM,PA2227	1017	2108	2367	338	413	82.5441	82.1824	83.2885	75.4607	82.3633	79.3746	81.1643	80.8086	81.8962	74.1993	80.9865	78.0478	-0.0526612	2237.27	375.882	2114.58	2359.96	325.057	426.707	-0.0673341	6.9064	1.10778	0.311855	0.383369
GL4_1180	CDS	1230888	1232489	.	inner membrane component of tripartite multidrug resistance system	P0AEJ0	emrB,b2686,JW2661	1602	1227	1388	289	348	48.0463	48.1914	71.2141	63.5843	48.1189	67.3992	29.9915	30.0821	44.4533	39.6906	30.0368	42.0719	0.47277	1307.27	318.842	1235.58	1378.96	275.73	361.954	0.470343	6.30155	41.9067	2.15189e-05	8.54849e-05
GL4_1181	CDS	1232486	1233733	.	membrane fusion component of tripartite multidrug resistance system	P52599	emrK,b2368,JW2365	1248	666	726	133	187	26.0789	25.2068	32.7733	34.1674	25.6428	33.4704	20.8966	20.1977	26.2606	27.3778	20.5472	26.8192	0.368583	696.205	159.882	658.025	734.386	138.263	181.5	0.383436	5.34602	15.244	0.00183178	0.00426731
GL4_1182	CDS	1233831	1233965	.	hypothetical protein	NA	NA	135	103	101	16	31	4.03323	3.50673	3.94265	5.66412	3.76998	4.80339	29.8758	25.9758	29.2048	41.9564	27.9258	35.5806	0.338725	102.103	23.4509	96.5038	107.703	20.28	26.6218	0.383027	2.58689	2.48521	0.139085	0.189449
GL4_1183	CDS	1234059	1234934	1.11.1.10	non-heme chloroperoxidase	O31158	cpo,cpoF	876	1152	1226	179	255	45.1095	42.5668	44.1084	46.592	43.8382	45.3502	51.4949	48.5922	50.3521	53.1872	50.0436	51.7696	0.0479786	1189.74	216.832	1124.49	1254.99	187.513	246.151	0.050041	6.03137	0.361722	0.557959	0.626457
GL4_1184	CDS	1235057	1235764	.	protein of unknown function DUF1275	O34343	yoaK,BSU18640	708	408	436	55	132	15.9763	15.1379	13.5529	24.1182	15.5571	18.8355	22.5654	21.3813	19.1425	34.0652	21.9733	26.6038	0.26491	422.264	92.8106	399.107	445.422	80.2612	105.36	0.320114	4.60298	2.88964	0.113085	0.158488
GL4_1185	CDS	1235808	1236074	.	hypothetical protein	NA	NA	267	101	112	23	26	3.95491	3.88865	5.66756	4.75055	3.92178	5.20906	14.8124	14.5642	21.2268	17.7923	14.6883	19.5096	0.386607	106.505	24.5214	100.665	112.346	21.2058	27.8371	0.38656	2.64689	3.11286	0.101292	0.144536
GL4_1186	CDS	1236101	1236307	.	hypothetical protein	NA	NA	207	49	68	4	11	1.91872	2.36096	0.985663	2.00985	2.13984	1.49776	9.26918	11.4056	4.76165	9.70942	10.3374	7.23554	-0.461156	58.4352	7.49033	55.2306	61.6399	6.47753	8.50314	-0.455743	1.68882	1.52217	0.239268	0.304714
GL4_1187	CDS	1236363	1237529	4.1.1.2	oxalate decarboxylase	O34714	oxdC,yvrK,BSU33240	1167	767	850	160	213	30.0338	29.5121	39.4265	38.918	29.7729	39.1722	25.7359	25.2888	33.7845	33.3487	25.5124	33.5666	0.382713	808.569	186.473	764.227	852.912	161.259	211.687	0.389551	5.56682	19.175	0.000757	0.00201927
GL4_1188	CDS	1237551	1239035	1.11.1.5	cytochrome c551 peroxidase	Q51658	mauG,Pden_4736	1485	1233	1355	242	313	48.2813	47.0457	59.6326	57.1893	47.6635	58.411	32.5126	31.6806	40.1566	38.5113	32.0966	39.334	0.285312	1294.27	277.546	1223.29	1365.24	240.018	315.074	0.28467	6.22345	15.3714	0.00177647	0.00414717
GL4_1189	CDS	1239049	1239615	.	YbbM seven transmembrane helix protein	P77307	fetB,ybbM,b0491,JW5066	567	494	539	95	150	19.3438	18.7141	23.4095	27.407	19.029	25.4083	34.1161	33.0055	41.2866	48.3369	33.5608	44.8117	0.406581	516.662	122.209	488.328	544.997	105.684	138.733	0.426022	4.92259	12.2074	0.00399481	0.00841838
GL4_1190	CDS	1239845	1240552	.	YbbL ABC transporter ATP-binding protein	Q8RCU0	pstB1,pstB,TTE0320	708	761	814	129	181	29.7989	28.2621	31.7876	33.0712	29.0305	32.4294	42.0888	39.9183	44.8978	46.7107	41.0036	45.8042	0.156127	787.923	154.901	744.713	831.133	133.956	175.846	0.159302	5.46488	2.67816	0.125851	0.173841
GL4_1191	CDS	1240520	1240651	.	hypothetical protein	NA	NA	132	149	167	26	39	5.83448	5.79825	6.40681	7.12583	5.81636	6.76632	44.2006	43.9261	48.5364	53.9835	44.0634	51.26	0.213752	157.993	32.4694	149.329	166.658	28.079	36.8597	0.223056	3.17215	1.31786	0.271792	0.340661
GL4_1192	CDS	1240872	1241165	.	hypothetical protein	NA	NA	294	734	780	138	197	28.7416	27.0816	34.0054	35.9946	27.9116	35	97.7607	92.1145	115.664	122.431	94.9376	119.047	0.323437	757.462	167.356	715.922	799.002	144.727	189.985	0.327708	5.45333	11.3516	0.00507188	0.0103458
GL4_1193	CDS	1241312	1241833	1.16.3.1	non-specific DNA-binding protein Dps	P73321	slr1894	522	647	721	137	187	25.3349	25.0332	33.7589	34.1674	25.1841	33.9632	48.5344	47.9563	64.6723	65.4549	48.2453	65.0636	0.423869	684.013	161.93	646.501	721.524	140.035	183.826	0.427282	5.33285	19.4425	0.000715871	0.00192188
GL4_1194	CDS	1242063	1242350	.	hypothetical protein	NA	NA	288	290	343	64	98	11.3557	11.909	15.7706	17.9059	11.6323	16.8383	39.4295	41.3506	54.759	62.1734	40.3901	58.4662	0.522786	316.258	80.8421	298.914	333.602	69.9111	91.7732	0.537823	4.23834	13.6921	0.00269549	0.00597025
GL4_1195	CDS	1242374	1243150	.	transcriptional regulator, AraC family	O31449	ybfI,BSU02220	777	849	921	181	232	33.2448	31.9772	44.6012	42.3895	32.611	43.4954	42.7861	41.1547	57.4018	54.5554	41.9704	55.9786	0.407079	885.303	206.551	836.752	933.853	178.622	234.48	0.406288	5.70508	22.6687	0.000378362	0.0010991
GL4_1196	CDS	1243501	1243902	.	two-component response regulator	O87940	tdiR	402	654	782	127	223	25.609	27.1511	31.2948	40.7451	26.3801	36.02	63.7041	67.54	77.8477	101.356	65.6221	89.6019	0.443541	717.392	174.453	678.05	756.734	150.864	198.041	0.466004	5.41422	15.4638	0.00173754	0.00407629
GL4_1197	CDS	1243990	1244598	.	two-component response regulator	P15940	nodW,bll1714	609	628	722	151	159	24.5909	25.0679	37.2088	29.0515	24.8294	33.1301	40.3792	41.1624	61.0981	47.7035	40.7708	54.4008	0.407413	674.747	155.378	637.744	711.751	134.369	176.388	0.387378	5.30121	12.0044	0.00422408	0.00883288
GL4_1198	CDS	1244637	1246100	.	two-component hybrid sensor and regulator	P15939	nodV,bll1715	1464	2260	2503	433	546	88.4961	86.9043	106.698	99.7616	87.7002	103.23	60.4481	59.3609	72.8811	68.1432	59.9045	70.5121	0.231639	2381.82	489.855	2251.2	2512.44	423.619	556.091	0.224391	7.09482	14.5495	0.00217104	0.0049707
GL4_1199	CDS	1246934	1247737	.	thiosulfate reductase cytochrome B subunit	NA	NA	804	1022	1149	190	301	40.019	39.8934	46.819	54.9968	39.9562	50.9079	49.7749	49.6186	58.2326	68.404	49.6967	63.3183	0.343335	1085.4	245.014	1025.88	1144.92	211.884	278.144	0.358694	5.98878	16.3078	0.00142426	0.00345329
GL4_1200	CDS	1247734	1248522	.	sulfite oxidase and related enzymes	Q8XV50	msrP,RSc2981,RS01260	789	1070	1199	208	275	41.8986	41.6294	51.2545	50.2462	41.764	50.7503	53.1034	52.7622	64.9613	63.6834	52.9328	64.3224	0.276414	1134.44	241.482	1072.23	1196.65	208.83	274.134	0.274006	6.02723	12.6661	0.00352809	0.00754337
GL4_1201	CDS	1249035	1249592	.	hypothetical protein	NA	NA	558	393	358	69	99	15.3889	12.4298	17.0027	18.0886	13.9094	17.5457	27.5787	22.2756	30.4708	32.4169	24.9272	31.4438	0.323481	376.567	83.9069	355.916	397.219	72.5614	95.2524	0.339828	4.44021	4.66096	0.0502592	0.07833
GL4_1202	CDS	1250014	1251045	.	HoxN/HupN/NixA family nickel/cobalt transporter	P23516	hoxN,PHG023	1032	584	604	111	207	22.868	20.9709	27.3521	37.8217	21.9195	32.5869	22.1589	20.3207	26.504	36.6489	21.2398	31.5765	0.550687	594.573	158.33	561.966	627.18	136.922	179.739	0.596953	5.17871	19.9603	0.000643374	0.00175424
GL4_1203	CDS	1251136	1252212	.	hypothetical protein	NA	NA	1077	583	652	118	177	22.8289	22.6375	29.077	32.3403	22.7332	30.7087	21.1967	21.019	26.9982	30.0281	21.1079	28.5132	0.416799	617.484	147.274	583.62	651.347	127.36	167.188	0.43802	5.18622	16.8798	0.00124908	0.00309159
GL4_1204	CDS	1252757	1254526	.	L-sorbosone dehydrogenase	Q44091		1770	2037	2243	356	474	79.7639	77.8771	87.724	86.6062	78.8205	87.1651	45.0644	43.9984	49.5616	48.9301	44.5314	49.2458	0.142143	2140.48	414.91	2023.09	2257.86	358.808	471.012	0.138972	6.90876	5.20671	0.0401018	0.0639669
GL4_1205	CDS	1254612	1255538	.	aldo-keto reductase	A2XRZ0	OsI_15387,OSIGBa0115A19.4	927	1346	1560	260	357	52.7061	54.1633	64.0681	65.2287	53.4347	64.6484	56.8566	58.4286	69.1133	70.3654	57.6426	69.7394	0.270565	1452.24	308.335	1372.6	1531.88	266.644	350.027	0.270303	6.38685	14.3917	0.00225798	0.00514497
GL4_1206	CDS	1255990	1256391	.	Rrf2 family transcriptional regulator	O68025	RCAP_rcc02142	402	527	538	84	134	20.636	18.6794	20.6989	24.4836	19.6577	22.5913	51.3334	46.4662	51.4898	60.9045	48.8998	56.1972	0.19691	533.175	108.749	503.935	562.415	94.0447	123.454	0.212363	4.91314	2.67039	0.126353	0.174317
GL4_1207	CDS	1256545	1257567	.	sulfate and thiosulfate binding protein CysP	P0AG79	sbp,SF3995,S3752	1023	626	671	99	153	24.5126	23.2972	24.3951	27.9552	23.9049	26.1752	23.9615	22.7734	23.8467	27.3267	23.3674	25.5867	0.125748	648.847	125.792	613.264	684.43	108.783	142.801	0.139166	5.17908	1.51358	0.240526	0.306083
GL4_1208	CDS	1257576	1258424	.	sulfate transport system permease protein CysT	Q9TKU8	cysT	849	270	235	58	84	10.5725	8.15921	14.2921	15.3479	9.36588	14.82	12.4529	9.61038	16.834	18.0777	11.0317	17.4559	0.617243	253.276	70.9138	239.386	267.166	61.3252	80.5024	0.669022	3.94918	14.231	0.00235072	0.00531987
GL4_1209	CDS	1258417	1259301	.	sulfate transport system permease protein CysW	P0AEB0	cysW,b2423,JW2416	885	469	508	131	154	18.3649	17.6378	32.2804	28.1379	18.0013	30.2092	20.7513	19.9297	36.4751	31.7942	20.3405	34.1347	0.719301	488.697	142.732	461.896	515.497	123.433	162.032	0.730168	4.93031	41.1322	2.36339e-05	9.20131e-05
GL4_1210	CDS	1259311	1260417	3.6.3.25	sulfate and thiosulfate import ATP-binding protein CysA	P63354	cysA,BR0110,BS1330_I0110	1107	737	807	147	197	28.8591	28.0191	36.2231	35.9946	28.4391	36.1088	26.0697	25.3108	32.7219	32.5154	25.6902	32.6186	0.332949	772.182	171.963	729.835	814.529	148.711	195.215	0.339123	5.48465	13.4445	0.00287332	0.00629708
GL4_1211	CDS	1260484	1262229	.	hypothetical protein	P72958	sll0640	1746	767	872	164	256	30.0338	30.2759	40.4122	46.7747	30.1549	43.5934	17.2015	17.3401	23.1456	26.7896	17.2708	24.9676	0.50717	819.319	209.607	774.387	864.251	181.265	237.949	0.539191	5.63318	32.1573	7.84499e-05	0.000270912
GL4_1212	CDS	1262480	1263796	.	phosphate-specific outer membrane porin OprP	P33976	CC_0911	1317	898	835	171	231	35.1635	28.9913	42.1371	42.2068	32.0774	42.172	26.6997	22.0131	31.9947	32.0477	24.3564	32.0212	0.381044	868.415	200.941	820.79	916.039	173.771	228.111	0.394349	5.67359	12.2391	0.00396044	0.00836036
GL4_1213	CDS	1264027	1264590	.	hypothetical protein	NA	NA	564	226	236	55	63	8.84961	8.19393	13.5529	11.511	8.52177	12.5319	15.6908	14.5283	24.0299	20.4095	15.1095	22.2197	0.527435	231.186	59.091	218.508	243.865	51.101	67.081	0.537589	3.78367	10.8749	0.00581723	0.011673
GL4_1214	CDS	1264558	1265283	.	hypothetical protein	NA	NA	726	409	402	88	113	16.0154	13.9575	21.6846	20.6466	14.9865	21.1656	22.0598	19.2252	29.8686	28.4389	20.6425	29.1537	0.478469	406.232	100.531	383.954	428.51	86.9377	114.124	0.491165	4.58878	13.0699	0.00316903	0.00685936
GL4_1215	CDS	1265463	1266356	.	transcriptional regulator, LysR family	Q01610	PA2220	894	1117	1191	254	336	43.739	41.3516	62.5896	61.3918	42.5453	61.9907	48.925	46.2546	70.0107	68.6709	47.5898	69.3408	0.533708	1154.67	294.973	1091.34	1217.99	255.088	334.858	0.537142	6.14155	51.7938	7.23286e-06	3.31199e-05
GL4_1216	CDS	1266492	1267367	.	putative periplasmic ATP/GTP-binding protein	NA	NA	876	1307	1589	5030	5474	51.1789	55.1702	1239.47	1000.17	53.1746	1119.82	58.4234	62.9797	1414.92	1141.75	60.7015	1278.34	4.37394	1445.53	5312.94	1366.26	1524.81	4594.55	6031.33	4.38375	9.60333	2232.8	7.40702e-16	1.89677e-13
GL4_1217	CDS	1267370	1269121	.	L-sorbosone dehydrogenase	Q44091		1752	2269	2487	7279	7432	88.8485	86.3488	1793.66	1357.93	87.5986	1575.79	50.7126	49.2858	1023.78	775.073	49.9992	899.425	4.14206	2378.97	7473.68	2248.5	2509.43	6463.13	8484.24	4.15741	10.1494	1603.07	6.2114e-15	7.13026e-13
GL4_1218	CDS	1269304	1270356	.	probable RND efflux membrane fusion protein	D3V7P2	mdtA,XBJ1_2730	1053	2970	3361	1700	1913	116.298	116.694	418.907	349.531	116.496	384.219	110.444	110.821	397.822	331.938	110.633	364.88	1.71261	3164.52	1820.06	2990.97	3338.06	1573.96	2066.16	1.70798	8.35403	600.835	3.24615e-12	1.12567e-10
GL4_1219	CDS	1270359	1273454	.	RND multidrug efflux transporter	Q57124	HI_0895	3096	5031	5652	1690	2046	197.002	196.238	416.442	373.832	196.62	395.137	63.631	63.3843	134.51	120.747	63.5077	127.628	0.995665	5340.64	1875.58	5047.76	5633.52	1621.98	2129.19	0.996345	8.67826	284.621	3.52177e-10	5.89144e-09
GL4_1220	CDS	1273591	1275057	.	putative exported protein	NA	NA	1467	10582	12103	3480	4153	414.365	420.217	857.526	758.809	417.291	808.168	282.458	286.446	584.544	517.252	284.452	550.898	0.951154	11335.2	3838.21	10713.6	11956.9	3319.22	4357.19	0.943725	9.77053	221.733	1.64106e-09	2.24641e-08
GL4_1221	CDS	1275094	1276572	.	hypothetical signal peptide protein	NA	NA	1479	11814	13858	4362	5227	462.607	481.151	1074.87	955.044	471.879	1014.95	312.784	325.322	726.751	645.736	319.053	686.244	1.10251	12819.2	4821.3	12116.2	13522.2	4169.39	5473.21	1.09522	10.0509	289.125	3.19513e-10	5.42684e-09
GL4_1222	CDS	1276599	1277408	.	hypothetical protein	NA	NA	810	9174	10666	2807	3316	359.231	370.324	691.689	605.878	364.778	648.783	443.496	457.19	853.937	747.998	450.343	800.967	0.829319	9909.47	3080.09	9366.03	10452.9	2663.61	3496.56	0.820197	9.49518	161.084	1.14228e-08	1.18833e-07
GL4_1223	CDS	1277615	1278130	.	hypothetical protein	NA	NA	516	1577	1679	428	510	61.7515	58.295	105.466	93.1839	60.0232	99.3249	119.673	112.975	204.391	180.589	116.324	192.49	0.721761	1629.1	469.735	1539.76	1718.44	406.219	533.25	0.711814	6.72732	112.034	9.83143e-08	7.79258e-07
GL4_1224	CDS	1279285	1279944	.	hypothetical protein	NA	NA	660	2457	2799	362	475	96.2101	97.1815	89.2025	86.7889	96.6958	87.9957	145.773	147.245	135.155	131.498	146.509	133.327	-0.135053	2627.02	418.503	2482.95	2771.08	361.915	475.091	-0.144057	7.11261	5.76299	0.0321559	0.0529412
GL4_1225	CDS	1279980	1280201	.	hypothetical protein	NA	NA	222	1414	1634	228	293	55.3688	56.7326	56.1828	53.5351	56.0507	54.8589	249.409	255.552	253.076	241.149	252.481	247.112	-0.0308822	1523.25	260.558	1439.71	1606.78	225.326	295.789	-0.0414221	6.36178	0.320666	0.580912	0.647425
GL4_1226	CDS	1280384	1282180	.	hypothetical protein	P17867	cisA,spoIVCA,BSU25770	1797	1028	1004	195	292	40.254	34.8589	48.051	53.3524	37.5565	50.7017	22.4006	19.3984	26.7396	29.6897	20.8995	28.2146	0.415791	1017.67	243.156	961.86	1073.48	210.277	276.034	0.44065	5.92139	19.6283	0.000688821	0.00186127
GL4_1227	CDS	1282173	1282526	.	putative bacteriophage-related protein	NA	NA	354	230	217	42	51	9.00624	7.53425	10.3495	9.31839	8.27025	9.83392	25.4413	21.2832	29.2358	26.3231	23.3623	27.7794	0.24039	223.955	46.5342	211.673	236.237	40.2421	52.8263	0.238993	3.6706	1.70795	0.214038	0.276068
GL4_1228	CDS	1282683	1283309	.	hypothetical protein	NA	NA	627	828	890	102	180	32.4225	30.9009	25.1344	32.8884	31.6617	29.0114	51.7105	49.2837	40.0868	52.4536	50.4971	46.2702	-0.123559	859.415	140.658	812.285	906.546	121.639	159.677	-0.105091	5.52556	0.815264	0.383096	0.456452
GL4_1229	CDS	1283518	1284930	.	phage-related protein	Q9P9T5	XF_1569,XF_1674	1413	888	975	162	204	34.7719	33.8521	39.9193	37.2736	34.312	38.5964	24.6086	23.9576	28.2515	26.379	24.2831	27.3152	0.163407	931.688	183.071	880.594	982.783	158.317	207.825	0.158567	5.70748	3.29966	0.0925605	0.133276
GL4_1230	CDS	1284935	1285357	.	hypothetical protein	NA	NA	423	239	285	33	56	9.35866	9.89522	8.13172	10.232	9.62694	9.18184	22.1245	23.393	19.2239	24.189	22.7587	21.7065	-0.0653534	261.778	44.4033	247.422	276.134	38.3993	50.4073	-0.0535139	3.83931	0.0899561	0.769005	0.809875
GL4_1231	CDS	1285354	1286697	.	DNA modification methylase	P34721	mboIBM,mboC	1344	552	565	93	132	21.615	19.6168	22.9167	24.1182	20.6159	23.5174	16.0826	14.5959	17.0511	17.9451	15.3392	17.4981	0.179037	559.176	112.399	528.511	589.842	97.2012	127.597	0.191307	4.97675	2.52151	0.136468	0.186572
GL4_1232	CDS	1287880	1288605	.	probable conserved integral membrane protein	Q6GNM0	nrm	726	1152	1348	185	255	45.1095	46.8026	45.5869	46.592	45.9561	46.0894	62.1343	64.4665	62.7919	64.1762	63.3004	63.4841	0.00411524	1249.21	219.898	1180.71	1317.72	190.165	249.632	-6.44969e-05	6.08775	6.35412e-07	0.999376	0.999376
GL4_1233	CDS	1288799	1289566	.	hypothetical protein	NA	NA	768	856	1059	222	328	33.5189	36.7685	54.7043	59.93	35.1437	57.3172	43.6444	47.8757	71.2295	78.0339	45.76	74.6317	0.693715	956.333	274.613	903.887	1008.78	237.481	311.745	0.705811	5.92189	60.7249	3.09872e-06	1.56061e-05
GL4_1234	CDS	1289955	1291214	.	hypothetical protein	NA	NA	1260	3007	3460	543	786	117.747	120.131	133.804	143.613	118.939	138.708	93.4498	95.3424	106.193	113.978	94.3961	110.086	0.219674	3231.46	662.841	3054.25	3408.68	573.215	752.467	0.22058	7.53853	13.0465	0.00318867	0.0068974
GL4_1235	CDS	1291452	1291655	.	hypothetical protein	NA	NA	204	805	903	137	141	31.5218	31.3522	33.7589	25.7626	31.437	29.7608	154.519	153.687	165.485	126.287	154.103	145.886	-0.0785287	853.944	139.288	807.113	900.775	120.454	158.122	-0.109996	5.51575	0.994679	0.336917	0.409043
GL4_1236	CDS	1292144	1293067	.	cobalt-zinc-cadmium resistance protein CzcD	P94178	czcD	924	2837	3370	730	875	111.09	117.007	179.883	159.874	114.048	169.879	120.227	126.631	194.679	173.024	123.429	183.852	0.571046	3099.51	804.672	2929.53	3269.49	695.868	913.476	0.560447	7.62378	80.8363	6.39227e-07	3.97012e-06
GL4_1237	CDS	1293253	1293705	.	hypothetical protein	NA	NA	453	2767	3221	603	750	108.349	111.833	148.589	137.035	110.091	142.812	239.181	246.873	328.01	302.506	243.027	315.258	0.374063	2991.47	677.437	2827.42	3155.52	585.838	769.037	0.363329	7.48378	38.7234	3.19229e-05	0.000121314
GL4_1238	CDS	1294440	1294892	.	hypothetical protein	Q5UPL7	MIMI_L153	453	6082	7170	1256	1543	238.156	248.943	309.498	281.927	243.55	295.713	525.731	549.543	683.219	622.355	537.637	652.787	0.279507	6616.97	1403.75	6254.1	6979.85	1213.94	1593.56	0.269153	8.60663	19.9601	0.000643413	0.00175424
GL4_1239	CDS	1295208	1295399	.	hypothetical protein	NA	NA	192	3659	4568	888	1033	143.277	158.601	218.817	188.743	150.939	203.78	746.237	826.048	1139.67	983.037	786.143	1061.35	0.432569	4103.05	964.697	3878.03	4328.06	834.255	1095.14	0.41748	7.97355	33.2835	6.66202e-05	0.000233206
GL4_1240	CDS	1295440	1298574	.	cobalt-zinc-cadmium resistance protein CzcA	P94177	czcA	3135	10497	11652	1663	2012	411.037	404.558	409.789	367.62	407.798	388.704	131.112	129.046	130.714	117.263	130.079	123.989	-0.0686389	11076.1	1845.22	10468.6	11683.5	1595.71	2094.72	-0.0795345	9.19876	1.73726	0.210381	0.27188
GL4_1241	CDS	1298588	1299619	.	cobalt/zinc/cadmium efflux RND transporter, membrane fusion protein, CzcB family	P13510	czcB,Rmet_5981	1032	2955	3424	397	513	115.711	118.881	97.827	93.732	117.296	95.7795	112.123	115.195	94.7936	90.8256	113.659	92.8096	-0.289541	3187.12	455.132	3012.33	3361.9	393.591	516.673	-0.301825	7.34055	25.304	0.000234771	0.000716364
GL4_1242	CDS	1299620	1300012	.	hypothetical protein	NA	NA	393	1121	1310	219	239	43.8956	45.4833	53.965	43.6685	44.6895	48.8168	111.694	115.734	137.316	111.116	113.714	124.216	0.126379	1214.77	229.421	1148.15	1281.39	198.4	260.443	0.101423	6.07593	1.26575	0.281035	0.350793
GL4_1243	CDS	1301564	1302832	.	probable Co/Zn/Cd efflux system membrane fusion protein	Q8XEH9	cusB,Z0713,ECs0612	1269	1151	1234	161	285	45.0703	42.8446	39.6729	52.0734	43.9575	45.8731	35.5164	33.7625	31.2631	41.035	34.6394	36.149	0.0598504	1193.13	222.371	1127.7	1258.56	192.303	252.439	0.0823254	6.04387	0.623431	0.444027	0.517928
GL4_1244	CDS	1302946	1303194	.	hypothetical protein	NA	NA	249	824	925	154	185	32.2658	32.1161	37.948	33.802	32.1909	35.875	129.582	128.98	152.402	135.751	129.281	144.076	0.155187	874.436	169.641	826.482	922.391	146.703	192.579	0.140143	5.61067	2.31418	0.152294	0.205008
GL4_1245	CDS	1303193	1303321	.	hypothetical protein	NA	NA	129	669	795	147	194	26.1964	27.6025	36.2231	35.4464	26.8994	35.8348	203.073	213.972	280.799	274.779	208.523	277.789	0.412066	731.432	170.49	691.32	771.545	147.437	193.543	0.404909	5.42434	17.513	0.00108353	0.0027493
GL4_1246	CDS	1303493	1303765	.	CopG protein	NA	NA	273	3180	3637	538	672	124.521	126.277	132.572	122.784	125.399	127.678	456.121	462.553	485.61	449.756	459.337	467.683	0.0259238	3406.76	605.733	3219.93	3593.59	523.829	687.638	0.0144019	7.53821	0.0620039	0.807271	0.842976
GL4_1247	CDS	1304028	1304144	.	hypothetical protein	NA	NA	117	1649	2055	234	334	64.5708	71.3497	57.6613	61.0263	67.9603	59.3438	551.887	609.827	492.831	521.593	580.857	507.212	-0.195234	1848.88	283.743	1747.49	1950.28	245.377	322.11	-0.197923	6.59558	5.55092	0.0349436	0.0567727
GL4_1248	CDS	1306439	1306561	.	hypothetical protein	NA	NA	123	1901	2155	212	293	74.4385	74.8217	52.2401	53.5351	74.6301	52.8876	605.191	608.307	424.716	435.244	606.749	429.98	-0.495853	2027.5	252.373	1916.31	2138.69	218.249	286.498	-0.499959	6.65198	50.977	7.86191e-06	3.55602e-05
GL4_1249	CDS	1306860	1307300	.	hypothetical protein	NA	NA	441	1420	1619	176	227	55.6037	56.2118	43.3692	41.476	55.9078	42.4226	126.086	127.464	98.3427	94.0498	126.775	96.1963	-0.394632	1519.04	201.53	1435.73	1602.34	174.28	228.78	-0.407977	6.26702	27.7638	0.000154969	0.000494149
GL4_1250	CDS	1307283	1307570	.	carbohydrate-selective porin OprB	NA	NA	288	787	973	129	142	30.817	33.7826	31.7876	25.9453	32.2998	28.8665	107.003	117.301	110.374	90.0879	112.152	100.231	-0.160615	878.84	135.694	830.643	927.036	117.347	154.042	-0.189141	5.53911	2.80947	0.117728	0.163777
GL4_1251	CDS	1307599	1307799	.	hypothetical protein	NA	NA	201	981	1227	141	209	38.4136	42.6015	34.7446	38.1871	40.5075	36.4659	191.112	211.948	172.859	189.986	201.53	181.422	-0.150854	1102.37	174.825	1041.92	1162.83	151.186	198.464	-0.150554	5.87036	2.18879	0.162987	0.21788
GL4_1252	CDS	1308265	1310544	.	ferrichrome-iron receptor	P81549	bfrD,vir90,BP0856	2280	36752	41723	5219	6090	1439.12	1448.63	1286.04	1112.73	1443.87	1199.38	631.192	635.362	564.054	488.037	633.277	526.046	-0.267185	39219.4	5696.14	37068.6	41370.2	4925.94	6466.35	-0.277461	10.9308	17.3557	0.00112214	0.00282786
GL4_1253	CDS	1311146	1312570	.	heavy metal RND efflux outer membrane protein, CzcC family	P13509	czcC,Rmet_5982	1425	6158	7166	708	997	241.132	248.804	174.462	182.165	244.968	178.314	169.216	174.599	122.43	127.835	171.907	125.133	-0.45506	6655.12	850.336	6290.15	7020.09	735.357	965.314	-0.462296	8.33171	57.5433	4.13851e-06	1.99958e-05
GL4_1254	CDS	1312560	1313948	.	cobalt/zinc/cadmium efflux RND transporter, membrane fusion protein, CzcB family	P13510	czcB,Rmet_5981	1389	5751	6625	720	952	225.195	230.02	177.419	173.943	227.608	175.681	162.128	165.601	127.732	125.229	163.864	126.48	-0.371005	6183.2	835.785	5844.11	6522.29	722.774	948.796	-0.381088	8.25401	43.902	1.70052e-05	6.96312e-05
GL4_1255	CDS	1313956	1317090	.	cobalt-zinc-cadmium resistance protein CzcA	P94177	czcA	3135	12617	14557	1656	2111	494.051	505.42	408.064	385.708	499.735	396.886	157.592	161.218	130.164	123.033	159.405	126.598	-0.33011	13575.1	1886.37	12830.7	14319.6	1631.31	2141.44	-0.341224	9.38548	34.3527	5.72598e-05	0.00020257
GL4_1256	CDS	1317417	1317914	.	probable Co/Zn/Cd efflux system membrane fusion protein	NA	NA	498	1367	1518	221	269	53.5284	52.7051	54.4579	49.1499	53.1167	51.8039	107.487	105.833	109.353	98.6947	106.66	104.024	-0.0357657	1442.6	245.185	1363.49	1521.71	212.033	278.338	-0.0506728	6.28148	0.451507	0.513459	0.584777
GL4_1257	CDS	1317973	1318092	.	hypothetical protein	NA	NA	120	186	206	15	52	7.28331	7.15233	3.69623	9.5011	7.21782	6.59867	60.6942	59.6028	30.802	79.1759	60.1485	54.9889	-0.127176	196.017	33.2969	185.267	206.767	28.7946	37.7991	-0.0514251	3.42902	0.035978	0.852509	0.880274
GL4_1258	CDS	1318211	1318909	.	cobalt-zinc-cadmium resistance protein CzcD	NA	NA	699	2602	2761	455	559	101.888	95.8621	112.119	102.137	98.875	107.128	145.762	137.142	160.399	146.119	141.452	153.259	0.114877	2684.01	507.637	2536.82	2831.2	438.997	576.278	0.103519	7.22532	2.78147	0.119404	0.165831
GL4_1259	CDS	1319606	1320067	.	integral membrane protein	NA	NA	462	544	586	98	150	21.3017	20.346	24.1487	27.407	20.8238	25.7779	46.1076	44.0389	52.27	59.3226	45.0732	55.7963	0.301868	565.273	123.776	534.273	596.273	107.04	140.513	0.314727	5.02366	7.2667	0.0184287	0.032255
GL4_1260	CDS	1320364	1320498	.	hypothetical protein	NA	NA	135	445	516	58	86	17.4251	17.9156	14.2921	15.7134	17.6703	15.0027	129.075	132.708	105.867	116.395	130.891	111.131	-0.23416	480.222	71.9094	453.886	506.557	62.1862	81.6327	-0.23329	4.6705	2.83919	0.11598	0.161683
GL4_1261	CDS	1320836	1321030	.	hypothetical protein	NA	NA	195	1421	1800	253	329	55.6429	62.4961	62.3432	60.1128	59.0695	61.228	285.348	320.493	319.708	308.271	302.921	313.99	0.0516098	1607.56	291.031	1519.4	1695.72	251.679	330.383	0.0404141	6.46234	0.220504	0.646484	0.703775
GL4_1262	CDS	1321310	1321612	.	hypothetical protein	NA	NA	303	753	880	137	174	29.4856	30.5537	33.7589	31.7922	30.0196	32.7755	97.3123	100.837	111.416	104.925	99.0747	108.17	0.1255	816.025	155.548	771.274	860.777	134.516	176.581	0.114765	5.50398	1.43225	0.252899	0.319993
GL4_1263	CDS	1321856	1324267	2.7.9.2	phosphoenolpyruvate synthase	Q55905	ppsA,slr0301	2412	5446	6204	470	733	213.252	215.403	115.815	133.929	214.328	124.872	88.413	89.3048	48.0163	55.5261	88.8589	51.7712	-0.76791	5822.12	598.58	5502.83	6141.41	517.643	679.517	-0.775845	8.05448	117.574	7.41334e-08	6.09359e-07
GL4_1264	CDS	1324754	1326100	.	hypothetical protein	NA	NA	1347	913	1028	180	306	35.7508	35.6922	44.3548	55.9103	35.7215	50.1326	26.5411	26.4976	32.9286	41.5073	26.5193	37.218	0.473805	970.396	242.325	917.179	1023.61	209.559	275.091	0.504321	5.87165	25.5339	0.000225567	0.000691449
GL4_1265	CDS	1326066	1327799	.	type I secretion system ATPase	Q7ANN4	prsD,RB1292,SM_b21466	1734	1192	1325	217	336	46.6758	46.0041	53.4722	61.3918	46.3399	57.432	26.918	26.5306	30.8375	35.4047	26.7243	33.1211	0.299513	1258.57	275.995	1189.55	1327.59	238.677	313.314	0.316934	6.19244	14.8464	0.00201782	0.00465189
GL4_1266	CDS	1327815	1329119	.	HlyD family secretion protein	Q7ANN5	prsE,RB1291,SM_b21465	1305	1211	1243	226	332	47.4198	43.157	55.6899	60.6609	45.2884	58.1754	36.337	33.0705	42.6743	46.4834	34.7038	44.5789	0.352289	1228.34	278.647	1160.98	1295.7	240.97	316.324	0.365794	6.17336	18.8337	0.000813509	0.00214934
GL4_1267	CDS	1329244	1329669	.	transcriptional regulator, LuxR family	NA	NA	426	853	920	180	220	33.4014	31.9425	44.3548	40.197	32.6719	42.2759	78.407	74.9823	104.119	94.3591	76.6947	99.2392	0.367559	886.867	200.145	838.231	935.504	173.082	227.208	0.358299	5.69302	16.6139	0.00132721	0.00325113
GL4_1268	CDS	1329854	1340527	.	hypothetical protein	Q9K0K9	frpA,NMB0585	10674	6699	7428	1284	1990	262.316	257.901	316.398	363.6	260.109	339.999	24.5753	24.1616	29.6419	34.0641	24.3684	31.853	0.372991	7064.65	1624.07	6677.22	7452.08	1404.47	1843.67	0.385031	8.75832	29.6756	0.000114212	0.000380975
GL4_1269	CDS	1340549	1341745	.	hypothetical protein	NA	NA	1197	1085	1160	171	285	42.4859	40.2753	42.1371	52.0734	41.3806	47.1052	35.4937	33.6468	35.2022	43.5032	34.5703	39.3527	0.181994	1123.12	227.465	1061.52	1184.71	196.708	258.222	0.202218	5.99072	4.33946	0.0576779	0.0884838
GL4_1270	CDS	1341772	1342908	.	hypothetical protein	NA	NA	1137	1538	1750	295	370	60.2243	60.7601	72.6926	67.604	60.4922	70.1483	52.9677	53.439	63.9337	59.4582	53.2034	61.696	0.20999	1643.54	332.689	1553.4	1733.67	287.705	377.674	0.201466	6.54527	8.92614	0.0105474	0.019905
GL4_1271	CDS	1343137	1344081	.	hypothetical protein	NA	NA	945	1297	1455	247	397	50.7873	50.5177	60.8647	72.5373	50.6525	66.701	53.7432	53.4579	64.4071	76.759	53.6006	70.583	0.390702	1375.9	321.207	1300.45	1451.36	277.775	364.639	0.407189	6.35394	23.7321	0.000310739	0.000915442
GL4_1272	CDS	1344113	1345684	.	hypothetical protein	A0QYL8	MSMEG_3705,MSMEI_3617,LJ00_18410	1572	1747	1985	290	440	68.4082	68.9193	71.4605	80.394	68.6638	75.9272	43.5167	43.8418	45.4584	51.1412	43.6793	48.2998	0.141976	1865.49	364.31	1763.18	1967.79	315.05	413.571	0.149717	6.71191	4.33044	0.0579043	0.0887492
GL4_1273	CDS	1345728	1346498	1.3.1.54	cobalt-precorrin-6x reductase	P21920	cobK	771	878	880	167	213	34.3803	30.5537	41.1514	38.918	32.467	40.0347	44.5919	39.6286	53.3741	50.4773	42.1102	51.9257	0.295937	880.158	190.054	831.889	928.426	164.356	215.752	0.294631	5.66324	9.16287	0.00978045	0.018584
GL4_1274	CDS	1346578	1347006	1.1.1.205	inosine-5'-monophosphate dehydrogenase	Q9LEV3	CBSX3,At5g10860,T30N20.130	429	478	527	106	102	18.7173	18.2975	26.1201	18.6368	18.5074	22.3784	43.6301	42.6515	60.8859	43.4424	43.1408	52.1641	0.268342	502.589	104.412	475.026	530.151	90.2937	118.53	0.238862	4.83349	2.87144	0.11412	0.159556
GL4_1275	CDS	1347139	1348011	.	Mlr8238 protein	NA	NA	873	1148	1115	127	227	44.9529	38.7129	31.2948	41.476	41.8329	36.3854	51.4924	44.3446	35.8474	47.5097	47.9185	41.6786	-0.196869	1133.56	176.56	1071.39	1195.72	152.686	200.433	-0.176549	5.90464	2.04317	0.176626	0.233551
GL4_1276	CDS	1348291	1348530	.	hypothetical protein	NA	NA	240	1146	1314	227	238	44.8746	45.6222	55.9363	43.4858	45.2484	49.7111	186.977	190.092	233.068	181.191	188.535	207.13	0.135019	1229.56	233.026	1162.13	1296.99	201.517	264.534	0.106445	6.09506	1.30389	0.274228	0.343068
GL4_1277	CDS	1348608	1351058	.	sigma factor-like phosphatase with CBS pair domains	Q8THF6	msmS,MA_4561	2451	5356	6023	936	1055	209.728	209.119	230.645	192.763	209.423	211.704	85.5683	85.3198	94.1024	78.6466	85.4441	86.3745	0.0154455	5688.45	1001.43	5376.5	6000.41	866.021	1136.84	7.19615e-05	8.27209	1.11209e-06	0.999175	0.999376
GL4_1278	CDS	1351068	1351637	.	hypothetical protein	NA	NA	570	1336	1444	210	268	52.3145	50.1358	51.7473	48.9672	51.2251	50.3573	91.7798	87.9575	90.7847	85.9074	89.8687	88.3461	-0.0243785	1390.61	239.066	1314.35	1466.87	206.741	271.392	-0.0341852	6.23324	0.203098	0.659703	0.715358
GL4_1279	CDS	1351649	1352038	.	Fe-S oxidoreductase	Q02UQ8	PA14_02130	390	1037	1178	148	192	40.6064	40.9002	36.4695	35.081	40.7533	35.7753	104.119	104.872	93.5116	89.9513	104.496	91.7314	-0.186053	1107.25	170.016	1046.52	1167.97	147.028	193.005	-0.197142	5.86643	5.28443	0.0388623	0.0623483
GL4_1280	CDS	1352038	1353081	4.6.1.1	adenylate cyclase	P40138	cyaB	1044	2059	2355	297	373	80.6254	81.7657	73.1854	68.1522	81.1956	70.6688	77.2274	78.3197	70.101	65.2798	77.7735	67.6904	-0.197602	2206.1	335.189	2085.12	2327.08	289.866	380.511	-0.212384	6.84392	10.6709	0.00617459	0.0122949
GL4_1281	CDS	1353310	1353975	.	transcriptional regulator, Crp/Fnr family	P9WMH3	crp,Rv3676	666	1267	1257	227	327	49.6126	43.6431	55.9363	59.7473	46.6279	57.8418	74.4934	65.5302	83.9885	89.7107	70.0118	86.8496	0.306977	1263.96	276.714	1194.64	1333.27	239.298	314.129	0.314516	6.19863	12.4368	0.00375307	0.0079681
GL4_1282	CDS	1354076	1354285	.	hypothetical protein	NA	NA	210	397	388	71	87	15.5455	13.4714	17.4955	15.8961	14.5085	16.6958	74.0264	64.1494	83.312	75.6956	69.0879	79.5038	0.19989	393.242	79.0648	371.676	414.807	68.3741	89.7556	0.191641	4.46843	1.71221	0.213502	0.275484
GL4_1283	CDS	1354392	1355276	.	Zn-dependent hydrolases, including glyoxylases	Q3JRV4	BURPS1710b_2304	885	801	813	91	169	31.3652	28.2274	22.4238	30.8786	29.7963	26.6512	35.4409	31.8954	25.3377	34.8911	33.6681	30.1144	-0.15603	807.999	129.631	763.688	852.31	112.103	147.16	-0.133855	5.43112	1.04101	0.326315	0.398413
GL4_1284	CDS	1355291	1356970	.	oxidoreductase	Q54DK1	sqrdl,DDB_G0292250	1680	1073	1189	193	239	42.0161	41.2822	47.5582	43.6685	41.6491	45.6134	25.0096	24.5727	28.3085	25.9932	24.7911	27.1508	0.126302	1131.1	216.122	1069.07	1193.13	186.899	245.345	0.118212	5.97731	2.14869	0.166606	0.222208
GL4_1285	CDS	1356981	1358735	.	sulfate transporter	Q9FY46	SULTR4;1,At5g13550,MSH12.1,T6I14_80	1755	884	880	151	226	34.6153	30.5537	37.2088	41.2933	32.5845	39.251	19.7238	17.4095	21.2016	23.5289	18.5666	22.3652	0.255968	883.238	188.26	834.801	931.675	162.805	213.716	0.275911	5.66278	7.15929	0.0191427	0.03326
GL4_1286	CDS	1358745	1360694	.	hypothetical protein	P0DMC6	rcsC	1950	1127	1232	208	328	44.1306	42.7751	51.2545	59.93	43.4528	55.5922	22.6311	21.936	26.2843	30.7334	22.2835	28.5088	0.341839	1179.81	267.462	1115.11	1244.52	231.297	303.626	0.364832	6.11336	17.9706	0.000979646	0.00252418
GL4_1287	CDS	1360839	1361492	.	nitrate/nitrite response regulator protein	Q7WZY4	nreC,Sca_1888	654	706	776	157	199	27.6452	26.9428	38.6873	36.36	27.294	37.5236	42.271	41.1969	59.1548	55.5963	41.7339	57.3756	0.449982	741.139	178.068	700.494	781.783	153.99	202.145	0.448621	5.45691	23.4981	0.000324325	0.000951258
GL4_1288	CDS	1361698	1364118	.	hypothetical protein	NA	NA	2421	2658	2874	464	652	104.081	99.7855	114.337	119.129	101.933	116.733	42.9908	41.2166	47.2271	49.2066	42.1037	48.2169	0.19134	2767.66	557.211	2615.88	2919.44	481.868	632.555	0.19366	7.3022	10.5533	0.00639221	0.0126589
GL4_1289	CDS	1364400	1367264	.	cytochrome c family protein	NA	NA	2865	2117	2296	403	553	82.8965	79.7173	99.3055	101.041	81.3069	100.173	28.9342	27.8245	34.6616	35.2672	28.3794	34.9644	0.291766	2207.57	477.633	2086.51	2328.64	413.05	542.216	0.297534	7.01051	24.1814	0.000286445	0.000854459
GL4_1290	CDS	1367387	1368619	.	transporter, MFS superfamily	P32135	yihN,b3874,JW3845	1233	609	665	101	170	23.847	23.0888	24.888	31.0613	23.4679	27.9746	19.3406	18.7257	20.1849	25.1916	19.0332	22.6883	0.241782	637.182	135.144	602.238	672.125	116.87	153.417	0.268755	5.18559	5.12072	0.0415279	0.0659458
GL4_1291	CDS	1368732	1369076	.	hypothetical protein	NA	NA	345	502	470	70	117	19.6571	16.3184	17.2491	21.3775	17.9878	19.3133	56.9771	47.2998	49.9974	61.9637	52.1384	55.9805	0.100714	487.272	93.2273	460.549	513.994	80.6216	105.833	0.120093	4.7615	0.608796	0.449303	0.523714
GL4_1292	CDS	1369212	1369982	.	molybdenum ABC transporter, periplasmic molybdenum-binding protein ModA	Q08383	modA,molP	771	1155	1194	172	263	45.227	41.4558	42.3835	48.0537	43.3414	45.2186	58.6602	53.7688	54.9721	62.3264	56.2145	58.6493	0.0601238	1175.67	217.186	1111.2	1240.15	187.82	246.553	0.0695515	6.01952	0.574559	0.462058	0.535022
GL4_1293	CDS	1369998	1370666	.	molybdenum transport system permease protein ModB	Q08382	modB,molJ	669	626	673	106	115	24.5126	23.3666	26.1201	21.0121	23.9396	23.5661	36.6407	34.9277	39.0434	31.4082	35.7842	35.2258	-0.022068	649.831	110.704	614.194	685.468	95.7351	125.673	-0.0472944	5.13835	0.157864	0.697617	0.748668
GL4_1294	CDS	1370663	1371751	.	molybdenum transport ATP-binding protein ModC	Q08381	modC,molD	1089	868	954	130	192	33.9888	33.1229	32.034	35.081	33.5558	33.5575	31.211	30.4159	29.416	32.214	30.8135	30.815	6.94506e-05	911.176	160.836	861.207	961.146	139.088	182.583	0.00390552	5.63518	0.00171399	0.96761	0.973458
GL4_1295	CDS	1371780	1373339	.	hypothetical protein	P39886	tcmA	1560	3386	3793	310	428	132.587	131.693	76.3888	78.2014	132.14	77.2951	84.992	84.4187	48.9672	50.1291	84.7053	49.5482	-0.761727	3589.22	368.701	3392.39	3786.06	318.847	418.555	-0.777039	7.38425	159.218	1.22517e-08	1.26664e-07
GL4_1296	CDS	1373581	1373850	.	hypothetical protein	NA	NA	270	3095	3835	178	257	121.193	133.151	43.862	46.9574	127.172	45.4097	448.862	493.153	162.452	173.916	471.008	168.184	-1.48022	3457.8	217.303	3268.17	3647.42	187.92	246.685	-1.48587	7.20486	307.494	2.17973e-10	3.94366e-09
GL4_1297	CDS	1373898	1374251	.	hypothetical protein	NA	NA	354	4807	5818	236	310	188.23	202.001	58.1541	56.6412	195.116	57.3976	531.724	570.625	164.277	160.003	551.175	162.14	-1.75901	5302.53	272.997	5011.74	5593.33	236.084	309.911	-1.77354	7.73876	592.932	3.52999e-12	1.18294e-10
GL4_1298	CDS	1374409	1375854	.	two-component oxygen-sensor histidine kinase FixL	P26489	fixL,AZC_4654	1446	2576	2875	626	776	100.87	99.8202	154.256	141.786	100.345	148.021	69.7579	69.0319	106.678	98.0537	69.3949	102.366	0.554216	2725.5	702.033	2576.03	2874.97	607.108	796.959	0.549103	7.42681	94.5766	2.61983e-07	1.85168e-06
GL4_1299	CDS	1375851	1376477	.	two-component nitrogen fixation transcriptional regulator FixJ	P23221	fixJ,bll2759	627	1065	1180	591	803	41.7028	40.9697	145.632	146.719	41.3362	146.175	66.5116	65.3424	232.267	234.002	65.927	233.134	1.80668	1122.6	696.485	1061.03	1184.16	602.31	790.661	1.81718	6.76186	965.713	1.58888e-13	1.00409e-11
GL4_1300	CDS	1376614	1377015	.	hypothetical protein	NA	NA	402	6677	7817	531	697	261.455	271.407	130.847	127.351	266.431	129.099	650.386	675.141	325.489	316.794	662.763	321.142	-1.04297	7238.38	614.001	6841.42	7635.33	530.979	697.024	-1.05326	8.2887	295.894	2.76782e-10	4.82411e-09
GL4_1301	CDS	1377122	1377802	.	transcriptional regulatory protein	P13295	fixK,RA0667,SMa1225	681	25067	28015	686	687	981.562	972.683	169.041	125.524	977.122	147.283	1441.35	1428.32	248.225	184.323	1434.83	216.274	-2.7243	26540	693.684	25084.5	27995.5	599.887	787.481	-2.75163	9.78882	842.785	3.78437e-13	1.93818e-11
GL4_1302	CDS	1377799	1378158	.	hypothetical protein	P24059	cycB,blr6128	360	6828	7710	254	305	267.368	267.692	62.5896	55.7276	267.53	59.1586	742.688	743.588	173.86	154.799	743.138	164.329	-2.17023	7266.9	279.94	6868.38	7665.42	242.088	317.792	-2.19195	8.10757	1009.52	1.19712e-13	7.81413e-12
GL4_1303	CDS	1378350	1380023	1.9.3.1	cytochrome c oxidase subunit CcoN	Q03073	fixN,blr2763	1674	25827	28941	893	1186	1011.32	1004.83	220.049	216.698	1008.08	218.374	604.135	600.259	131.451	129.449	602.197	130.45	-2.19811	27381	1038.96	25879.4	28882.6	898.475	1179.44	-2.21388	9.8979	1264.84	2.83361e-14	2.30075e-12
GL4_1304	CDS	1380034	1380768	1.9.3.1	cytochrome c oxidase subunit CcoO	NA	NA	735	11296	13181	402	581	442.324	457.645	99.0591	106.157	449.984	102.608	601.801	622.646	134.774	144.431	612.224	139.602	-2.12479	12224.3	490.129	11553.9	12894.7	423.857	556.402	-2.13431	8.80958	964.701	1.59954e-13	1.00409e-11
GL4_1305	CDS	1380779	1380955	.	hypothetical protein	NA	NA	177	2300	2724	80	104	90.0624	94.5775	19.7133	19.0022	92.3199	19.3577	508.827	534.336	111.374	107.357	521.581	109.366	-2.24336	2509.43	92.0035	2371.81	2647.05	79.5632	104.444	-2.26301	6.6959	597.038	3.37911e-12	1.1597e-10
GL4_1306	CDS	1380959	1381825	1.9.3.1	cytochrome c oxidase subunit CcoP	Q9ZHR4	ccoP,cytP	867	10131	11340	405	580	396.705	393.726	99.7983	105.974	395.215	102.886	457.561	454.124	115.108	122.231	455.842	118.669	-1.93265	10734.7	491.28	10146	11323.4	424.851	557.708	-1.94346	8.66081	877.272	2.9312e-13	1.54888e-11
GL4_1307	CDS	1381845	1383317	.	type cbb3 cytochrome oxidase biogenesis protein CcoG	P18396	fixG,RA0661,SMa1211	1473	7470	8534	344	453	292.507	296.301	84.767	82.7692	294.404	83.7681	198.579	201.155	57.5472	56.1909	199.867	56.869	-1.79538	7997.3	398.47	7558.73	8435.88	344.591	452.35	-1.82083	8.28265	820.053	4.504e-13	2.19195e-11
GL4_1308	CDS	1383317	1383817	.	type cbb3 cytochrome oxidase biogenesis protein CcoH	P18397	fixH,RA0660,SMa1210	501	2610	3067	102	150	102.201	106.486	25.1344	27.407	104.344	26.2707	203.994	212.548	50.1685	54.7047	208.271	52.4366	-1.96947	2835.83	125.923	2680.31	2991.34	108.896	142.949	-1.98679	6.8813	540.211	6.36134e-12	1.92517e-10
GL4_1309	CDS	1383892	1386009	3.6.3.4	type cbb3 cytochrome oxidase biogenesis protein CcoI	Q59207	fixI,blr2769	2118	5189	5871	246	395	203.189	203.841	60.6182	72.1719	203.515	66.395	95.9342	96.2424	28.6205	34.0755	96.0883	31.348	-1.58562	5528.22	319.404	5225.05	5831.39	276.216	362.593	-1.6072	7.81756	439.398	2.33872e-11	5.81016e-10
GL4_1310	CDS	1386006	1386173	.	type cbb3 cytochrome oxidase biogenesis protein CcoS	P18399	fixS,RA0658,SMa1208	168	236	251	28	31	9.24118	8.71474	6.89964	5.66412	8.97796	6.28188	55.007	51.8734	41.0693	33.715	53.4402	37.3921	-0.503862	243.649	29.5318	230.287	257.011	25.5387	33.525	-0.537842	3.66325	7.80286	0.0152986	0.0274824
GL4_1311	CDS	1386217	1387371	1.14.15.3	alkane-1 monooxygenase	P21395	xylM	1155	830	824	135	236	32.5008	28.6093	33.2661	43.1204	30.5551	38.1933	28.1392	24.77	28.8018	37.3337	26.4546	33.0678	0.311359	828.187	184.973	782.769	873.605	159.962	209.984	0.343325	5.58832	8.16802	0.0135216	0.0247056
GL4_1312	CDS	1387456	1388409	1.1.1.100	3-oxoacyl-[acyl-carrier protein] reductase	Q9N126	RDH8,PRRDH	954	972	1159	206	299	38.0611	40.2406	50.7616	54.6313	39.1508	52.6965	39.8964	42.1809	53.2092	57.2656	41.0386	55.2374	0.419815	1064.62	252.224	1006.24	1123.01	218.119	286.328	0.428403	5.98299	25.6462	0.000221224	0.00067876
GL4_1313	CDS	1388412	1390766	.	hypothetical protein	Q58957	MJ1562	2355	11239	12536	2254	2896	440.092	435.251	555.421	529.138	437.671	542.28	186.875	184.82	235.847	224.687	185.848	230.267	0.307699	11887.7	2578.07	11235.8	12539.6	2229.48	2926.67	0.300941	9.47652	28.236	0.000143523	0.000462077
GL4_1314	CDS	1391319	1391975	2.8.3.8	acetyl-CoA:acetoacetyl-CoA transferase, alpha subunit	P76458	atoD,b2221,JW2215	657	3038	3693	224	309	118.961	128.221	55.1971	56.4585	123.591	55.8278	181.066	195.162	84.0139	85.9338	188.114	84.9738	-1.13729	3359.82	266.35	3175.56	3544.07	230.335	302.364	-1.15083	7.219	234.709	1.15763e-09	1.63295e-08
GL4_1315	CDS	1391972	1392625	2.8.3.8	acetyl-CoA:acetoacetyl-CoA transferase, beta subunit	P23673	ctfB,CA_P0164	654	2564	2703	180	265	100.4	93.8483	44.3548	48.4191	97.1242	46.387	153.517	143.499	67.8208	74.0353	148.508	70.9281	-1.05559	2636.19	222.269	2491.62	2780.76	192.215	252.323	-1.0619	6.90376	189.164	4.32558e-09	5.1798e-08
GL4_1316	CDS	1392662	1393366	.	probable metal-dependent peptidase	O05248	yugP,BSU31310	705	1320	1452	185	206	51.688	50.4135	45.5869	37.639	51.0508	41.6129	73.3163	71.5086	64.6623	53.3886	72.4124	59.0254	-0.29045	1386.28	195.773	1310.25	1462.3	169.302	222.245	-0.31786	6.15855	13.39	0.00291426	0.00637005
GL4_1317	CDS	1393365	1393532	.	hypothetical protein	NA	NA	168	783	823	94	148	30.6604	28.5746	23.1631	27.0416	29.6175	25.1023	182.502	170.087	137.875	160.962	176.295	149.419	-0.237165	803.634	120.824	759.562	847.706	104.487	137.161	-0.227519	5.40365	4.13652	0.0630366	0.0956466
GL4_1318	CDS	1393668	1394252	.	hypothetical protein	NA	NA	585	6751	7046	401	586	264.353	244.638	98.8127	107.07	254.495	102.941	451.885	418.184	168.911	183.026	435.034	175.968	-1.30095	6909.93	492.122	6530.99	7288.88	425.58	558.665	-1.30547	8.17149	351.59	9.45702e-11	1.88518e-09
GL4_1319	CDS	1394437	1394589	.	hypothetical protein	NA	NA	153	62	63	16	23	2.42777	2.18736	3.94265	4.20241	2.30757	4.07253	15.8678	14.2965	25.769	27.4667	15.0821	26.6178	0.780142	62.5317	19.4917	59.1024	65.961	16.8561	22.1272	0.822185	1.99975	11.0182	0.00558057	0.0112524
GL4_1320	CDS	1394626	1396218	1.1.1.95	D-3-phosphoglycerate dehydrogenase	Q58424	serA,MJ1018	1593	1309	1440	1225	1524	51.2572	49.9969	301.859	278.455	50.6271	290.157	32.1765	31.3854	189.491	174.799	31.781	182.145	2.48206	1374.81	1377.38	1299.42	1450.21	1191.14	1563.62	2.50855	7.65286	2001.01	1.49746e-15	3.11565e-13
GL4_1321	CDS	1396215	1396871	3.1.3.3	phosphoserine phosphatase	O82796	PSP,PSP1,At1g18640,F26I16.2	657	432	504	263	336	16.9161	17.4989	64.8073	61.3918	17.2075	63.0995	25.7474	26.6346	98.6413	93.4425	26.191	96.0419	1.83548	467.797	299.643	442.143	493.451	259.127	340.159	1.86293	5.36541	447.604	2.08184e-11	5.37243e-10
GL4_1322	CDS	1396960	1397547	.	hypothetical protein	NA	NA	588	4286	4538	340	407	167.829	157.56	83.7813	74.3644	162.694	79.0729	285.424	267.959	142.485	126.47	276.691	134.478	-1.03543	4417.18	374.12	4174.94	4659.42	323.533	424.707	-1.05543	7.61103	245.274	8.82973e-10	1.2949e-08
GL4_1323	CDS	1398018	1398638	.	transcriptional regulator, TetR family	NA	NA	621	4156	4986	934	1134	162.739	173.114	230.152	207.197	167.927	218.675	262.059	278.767	370.615	333.651	270.413	352.133	0.379722	4563.29	1037.1	4313.04	4813.54	896.868	1177.33	0.368512	8.1078	34.5706	5.5544e-05	0.000197338
GL4_1324	CDS	1398701	1399822	.	hypothetical protein	NA	NA	1122	2359	2441	371	487	92.3727	84.7517	91.4202	88.9815	88.5622	90.2008	82.3286	75.5363	81.4797	79.3061	78.9324	80.3929	0.0261225	2403.19	429	2271.4	2534.98	370.993	487.008	0.0201436	7.03695	0.0923417	0.76606	0.807541
GL4_1325	CDS	1399856	1400350	.	hypothetical protein	NA	NA	495	1099	1205	224	241	43.0342	41.8377	55.1971	44.034	42.4359	49.6155	86.9377	84.5206	111.509	88.9575	85.7291	100.233	0.223097	1152.26	232.973	1089.07	1215.45	201.472	264.475	0.199781	6.02806	4.85928	0.046249	0.0725215
GL4_1326	CDS	1400614	1401069	.	hypothetical protein	NA	NA	456	5572	7373	888	1226	218.186	255.991	218.817	224.007	237.088	221.412	478.478	561.384	479.862	491.243	519.931	485.553	-0.0984963	6445.44	1054.86	6091.97	6798.91	912.225	1197.49	-0.10518	8.41088	1.78743	0.204307	0.264955
GL4_1327	CDS	1401168	1403039	.	hypothetical protein	NA	NA	1872	76786	88977	7700	9286	3006.75	3089.29	1897.4	1696.68	3048.02	1797.04	1606.17	1650.26	1013.57	906.345	1628.22	959.957	-0.761634	82796.7	8539.26	78256.1	87337.4	7384.62	9693.9	-0.771341	11.8094	143.643	2.26846e-08	2.22109e-07
[truncated: 2,028 more rows]
